# Supplementary material for: Comprehensive in vivo identification of the c-Myc mRNA protein interactome using HyPR-MS
Source: RNA. 2019 Oct;25(10):1337–52. doi: 10.1261/rna.072157.119 (PMC6800478; doi:10.1261/rna.072157.119)
Supplement: Supplemental Material [file supp_072157.119_Supplemental_Table_S1.xlsx]

## Sheet: myc enriched proteins
myc enriched over lysate, scrambled, and/or polydT
Protein IDs	Protein names	Gene names
P49588	Alanine--tRNA ligase, cytoplasmic	AARS
P24752	Acetyl-CoA acetyltransferase, mitochondrial	ACAT1
P53396	ATP-citrate synthase	ACLY
Q99798	Aconitate hydratase, mitochondrial	ACO2
O43707	Alpha-actinin-4	ACTN4
P23526	Adenosylhomocysteinase	AHCY		present in at least 2 bioreps
Q09666	Neuroblast differentiation-associated protein AHNAK	AHNAK		contaminants removed
P54819	Adenylate kinase 2, mitochondrial;Adenylate kinase 2, mitochondrial, N-terminally processed	AK2
O75342	Arachidonate 12-lipoxygenase, 12R-type	ALOX12B
P63010	AP-2 complex subunit beta	AP2B1
P05089	Arginase-1	ARG1
P31939	Bifunctional purine biosynthesis protein PURH;Phosphoribosylaminoimidazolecarboxamide formyltransferase;IMP cyclohydrolase	ATIC
P25311	Zinc-alpha-2-glycoprotein	AZGP1
P30043	Flavin reductase (NADPH)	BLVRB
Q8TDN6	Ribosome biogenesis protein BRX1 homolog	BRIX1
P27824	Calnexin	CANX
P52907	F-actin-capping protein subunit alpha-1	CAPZA1
P78371	T-complex protein 1 subunit beta	CCT2
P49368	T-complex protein 1 subunit gamma	CCT3
P50991	T-complex protein 1 subunit delta	CCT4
P48643	T-complex protein 1 subunit epsilon	CCT5
P40227	T-complex protein 1 subunit zeta	CCT6A
Q99832	T-complex protein 1 subunit eta	CCT7
Q16543	Hsp90 co-chaperone Cdc37;Hsp90 co-chaperone Cdc37, N-terminally processed	CDC37
Q00610	Clathrin heavy chain 1	CLTC
P13073	Cytochrome c oxidase subunit 4 isoform 1, mitochondrial	COX4I1
Q08257	Quinone oxidoreductase	CRYZ
O75390	Citrate synthase, mitochondrial	CS
P07339	Cathepsin D;Cathepsin D light chain;Cathepsin D heavy chain	CTSD
P99999	Cytochrome c	CYCS
P14868	Aspartate--tRNA ligase, cytoplasmic	DARS
P39656	Dolichyl-diphosphooligosaccharide--protein glycosyltransferase 48 kDa subunit	DDOST
Q92499	ATP-dependent RNA helicase DDX1	DDX1
Q92841	Probable ATP-dependent RNA helicase DDX17	DDX17
Q9NVP1	ATP-dependent RNA helicase DDX18	DDX18
O43143	Pre-mRNA-splicing factor ATP-dependent RNA helicase DHX15	DHX15
Q99848	Probable rRNA-processing protein EBP2	EBNA1BP2
P29692	Elongation factor 1-delta	EEF1D
P26641	Elongation factor 1-gamma	EEF1G
P41091	Eukaryotic translation initiation factor 2 subunit 3	EIF2S3
Q2VIR3	Putative eukaryotic translation initiation factor 2 subunit 3-like protein	EIF2S3L
O60841	Eukaryotic translation initiation factor 5B	EIF5B
P56537	Eukaryotic translation initiation factor 6	EIF6
Q15717	ELAV-like protein 1	ELAVL1
P50402	Emerin	EMD
P07814	Bifunctional glutamate/proline--tRNA ligase;Glutamate--tRNA ligase;Proline--tRNA ligase	EPRS
Q9BSJ8	Extended synaptotagmin-1	ESYT1
P13804	Electron transfer flavoprotein subunit alpha, mitochondrial	ETFA
P38117	Electron transfer flavoprotein subunit beta	ETFB
Q9NSD9	Phenylalanine--tRNA ligase beta subunit	FARSB
P49327	Fatty acid synthase;[Acyl-carrier-protein] S-acetyltransferase;[Acyl-carrier-protein] S-malonyltransferase;3-oxoacyl-[acyl-carrier-protein] synthase;3-oxoacyl-[acyl-carrier-protein] reductase;3-hydroxyacyl-[acyl-carrier-protein] dehydratase;Enoyl-[acyl-carrier-protein] reductase;Oleoyl-[acyl-carrier-protein] hydrolase	FASN
P22087	rRNA 2-O-methyltransferase fibrillarin	FBL
Q86UX7	Fermitin family homolog 3	FERMT3
Q02790	Peptidyl-prolyl cis-trans isomerase FKBP4;Peptidyl-prolyl cis-trans isomerase FKBP4, N-terminally processed	FKBP4
P21333	Filamin-A	FLNA
Q14315	Filamin-C	FLNC
Q14697	Neutral alpha-glucosidase AB	GANAB
P41250	Glycine--tRNA ligase	GARS
P50395	Rab GDP dissociation inhibitor beta	GDI2
Q96QA5	Gasdermin-A	GSDMA
Q92522	Histone H1x	H1FX
Q71UI9	Histone H2A.V	H2AFV
P0C0S5	Histone H2A.Z	H2AFZ
Q9P035	Very-long-chain (3R)-3-hydroxyacyl-CoA dehydratase 3	HACD3
P40939	Trifunctional enzyme subunit alpha, mitochondrial;Long-chain enoyl-CoA hydratase;Long chain 3-hydroxyacyl-CoA dehydrogenase	HADHA
P69905	Hemoglobin subunit alpha	HBA1
P69891	Hemoglobin subunit gamma-1	HBG1
P16403	Histone H1.2	HIST1H1C
P16402	Histone H1.3	HIST1H1D
P10412	Histone H1.4	HIST1H1E
P33778	Histone H2B type 1-B	HIST1H2BB
P06899	Histone H2B type 1-J	HIST1H2BJ
P23527	Histone H2B type 1-O	HIST1H2BO
Q16778	Histone H2B type 2-E	HIST2H2BE
P26583	High mobility group protein B2	HMGB2
Q01581	Hydroxymethylglutaryl-CoA synthase, cytoplasmic	HMGCS1
P05204	Non-histone chromosomal protein HMG-17	HMGN2
Q99729	Heterogeneous nuclear ribonucleoprotein A/B	HNRNPAB
O43390	Heterogeneous nuclear ribonucleoprotein R	HNRNPR
Q58FF8	Putative heat shock protein HSP 90-beta 2	HSP90AB2P
P14625	Endoplasmin	HSP90B1
P34932	Heat shock 70 kDa protein 4	HSPA4
P61604	10 kDa heat shock protein, mitochondrial	HSPE1
Q92598	Heat shock protein 105 kDa	HSPH1
O75874	Isocitrate dehydrogenase [NADP] cytoplasmic	IDH1
Q9NZI8	Insulin-like growth factor 2 mRNA-binding protein 1	IGF2BP1
P01876	Ig alpha-1 chain C region	IGHA1
Q16891	MICOS complex subunit MIC60	IMMT
P12268	Inosine-5-monophosphate dehydrogenase 2	IMPDH2
P52292	Importin subunit alpha-1	KPNA2
Q14974	Importin subunit beta-1	KPNB1
Q14739	Lamin-B receptor	LBR
P47929	Galectin-7	LGALS7
P36776	Lon protease homolog, mitochondrial	LONP1
Q96AG4	Leucine-rich repeat-containing protein 59	LRRC59
Q9Y383	Putative RNA-binding protein Luc7-like 2	LUC7L2
Q96N66	Lysophospholipid acyltransferase 7	MBOAT7
P49736	DNA replication licensing factor MCM2	MCM2
P25205	DNA replication licensing factor MCM3	MCM3
Q14566	DNA replication licensing factor MCM6	MCM6
P33993	DNA replication licensing factor MCM7	MCM7
P40925	Malate dehydrogenase, cytoplasmic	MDH1
P40926	Malate dehydrogenase, mitochondrial	MDH2
Q9BQG0	Myb-binding protein 1A	MYBBP1A
Q6ZVX7	F-box only protein 50	NCCRP1
Q14978	Nucleolar and coiled-body phosphoprotein 1	NOLC1
P46087	Probable 28S rRNA (cytosine(4447)-C(5))-methyltransferase	NOP2
O00567	Nucleolar protein 56	NOP56
Q9Y2X3	Nucleolar protein 58	NOP58
Q9Y266	Nuclear migration protein nudC	NUDC
P04181	Ornithine aminotransferase, mitochondrial;Ornithine aminotransferase, hepatic form;Ornithine aminotransferase, renal form	OAT
Q9NTK5	Obg-like ATPase 1	OLA1
P07237	Protein disulfide-isomerase	P4HB
Q9UQ80	Proliferation-associated protein 2G4	PA2G4
P11940	Polyadenylate-binding protein 1	PABPC1
P22234	Multifunctional protein ADE2;Phosphoribosylaminoimidazole-succinocarboxamide synthase;Phosphoribosylaminoimidazole carboxylase	PAICS
P30101	Protein disulfide-isomerase A3	PDIA3
Q15084	Protein disulfide-isomerase A6	PDIA6
P18669	Phosphoglycerate mutase 1	PGAM1
P35232	Prohibitin	PHB
Q99623	Prohibitin-2	PHB2
Q13492	Phosphatidylinositol-binding clathrin assembly protein	PICALM
P30153	Serine/threonine-protein phosphatase 2A 65 kDa regulatory subunit A alpha isoform	PPP2R1A
P78527	DNA-dependent protein kinase catalytic subunit	PRKDC
P60900	Proteasome subunit alpha type-6	PSMA6
O14818	Proteasome subunit alpha type-7	PSMA7
Q8TAA3	Proteasome subunit alpha type-7-like	PSMA8
P49721	Proteasome subunit beta type-2	PSMB2
P28074	Proteasome subunit beta type-5	PSMB5
P28072	Proteasome subunit beta type-6	PSMB6
Q13200	26S proteasome non-ATPase regulatory subunit 2	PSMD2
P32322	Pyrroline-5-carboxylate reductase 1, mitochondrial	PYCR1
P61026	Ras-related protein Rab-10	RAB10
P62820	Ras-related protein Rab-1A	RAB1A
Q9UKM9	RNA-binding protein Raly	RALY
P43487	Ran-specific GTPase-activating protein	RANBP1
P18754	Regulator of chromosome condensation	RCC1
Q9P258	Protein RCC2	RCC2
P27635	60S ribosomal protein L10	RPL10
P62906	60S ribosomal protein L10a	RPL10A
Q96L21	60S ribosomal protein L10-like	RPL10L
P62913	60S ribosomal protein L11	RPL11
P30050	60S ribosomal protein L12	RPL12
P26373	60S ribosomal protein L13	RPL13
P40429	60S ribosomal protein L13a	RPL13A
Q6NVV1	Putative 60S ribosomal protein L13a protein RPL13AP3	RPL13AP3
P50914	60S ribosomal protein L14	RPL14
P18621	60S ribosomal protein L17	RPL17
Q07020	60S ribosomal protein L18	RPL18
Q02543	60S ribosomal protein L18a	RPL18A
P84098	60S ribosomal protein L19	RPL19
P35268	60S ribosomal protein L22	RPL22
P62829	60S ribosomal protein L23	RPL23
P62750	60S ribosomal protein L23a	RPL23A
P83731	60S ribosomal protein L24	RPL24
P61254	60S ribosomal protein L26	RPL26
Q9UNX3	60S ribosomal protein L26-like 1	RPL26L1
P61353	60S ribosomal protein L27	RPL27
P47914	60S ribosomal protein L29	RPL29
P39023	60S ribosomal protein L3	RPL3
P62899	60S ribosomal protein L31	RPL31
P49207	60S ribosomal protein L34	RPL34
P42766	60S ribosomal protein L35	RPL35
P18077	60S ribosomal protein L35a	RPL35A
P62917	60S ribosomal protein L8	RPL8
P32969	60S ribosomal protein L9	RPL9
P05388	60S acidic ribosomal protein P0	RPLP0
Q8NHW5	60S acidic ribosomal protein P0-like	RPLP0P6
P04844	Dolichyl-diphosphooligosaccharide--protein glycosyltransferase subunit 2	RPN2
P62244	40S ribosomal protein S15a	RPS15A
P62269	40S ribosomal protein S18	RPS18
P39019	40S ribosomal protein S19	RPS19
P15880	40S ribosomal protein S2	RPS2
P60866	40S ribosomal protein S20	RPS20
P62266	40S ribosomal protein S23	RPS23
P62847	40S ribosomal protein S24	RPS24
P62851	40S ribosomal protein S25	RPS25
P42677	40S ribosomal protein S27	RPS27
P62701	40S ribosomal protein S4, X isoform	RPS4X
P62753	40S ribosomal protein S6	RPS6
P46781	40S ribosomal protein S9	RPS9
Q9P2E9	Ribosome-binding protein 1	RRBP1
O76021	Ribosomal L1 domain-containing protein 1	RSL1D1
Q9Y265	RuvB-like 1	RUVBL1
P05109	Protein S100-A8;Protein S100-A8, N-terminally processed	S100A8
P06702	Protein S100-A9	S100A9
Q6UWP8	Suprabasin	SBSN
P31040	Succinate dehydrogenase [ubiquinone] flavoprotein subunit, mitochondrial	SDHA
P53992	Protein transport protein Sec24C	SEC24C
Q96P63	Serpin B12	SERPINB12
P29508	Serpin B3	SERPINB3
P50454	Serpin H1	SERPINH1
Q13435	Splicing factor 3B subunit 2	SF3B2
Q9H9B4	Sideroflexin-1	SFXN1
P34897	Serine hydroxymethyltransferase, mitochondrial	SHMT2
P53007	Tricarboxylate transport protein, mitochondrial	SLC25A1
Q7KZF4	Staphylococcal nuclease domain-containing protein 1	SND1
P14678	Small nuclear ribonucleoprotein-associated proteins B and B	SNRPB
P62318	Small nuclear ribonucleoprotein Sm D3	SNRPD3
P63162	Small nuclear ribonucleoprotein-associated protein N	SNRPN
P37108	Signal recognition particle 14 kDa protein	SRP14
Q07955	Serine/arginine-rich splicing factor 1	SRSF1
Q01130	Serine/arginine-rich splicing factor 2	SRSF2
P42229	Signal transducer and activator of transcription 5A	STAT5A
P51692	Signal transducer and activator of transcription 5B	STAT5B
P31948	Stress-induced-phosphoprotein 1	STIP1
Q9UJZ1	Stomatin-like protein 2, mitochondrial	STOML2
P37837	Transaldolase	TALDO1
P26639	Threonine--tRNA ligase, cytoplasmic	TARS
Q13428	Treacle protein	TCOF1
P17987	T-complex protein 1 subunit alpha	TCP1
P02786	Transferrin receptor protein 1;Transferrin receptor protein 1, serum form	TFRC
Q9Y490	Talin-1	TLN1
Q8WUH6	Transmembrane protein 263	TMEM263
P57088	Transmembrane protein 33	TMEM33
P11387	DNA topoisomerase 1	TOP1
Q12931	Heat shock protein 75 kDa, mitochondrial	TRAP1
P68371	Tubulin beta-4B chain	TUBB4B
P10599	Thioredoxin	TXN
P61088	Ubiquitin-conjugating enzyme E2 N	UBE2N
Q5JXB2	Putative ubiquitin-conjugating enzyme E2 N-like	UBE2NL
Q9P0L0	Vesicle-associated membrane protein-associated protein A	VAPA
P26640	Valine--tRNA ligase	VARS
P18206	Vinculin	VCL
P55072	Transitional endoplasmic reticulum ATPase	VCP
P21796	Voltage-dependent anion-selective channel protein 1	VDAC1
P54577	Tyrosine--tRNA ligase, cytoplasmic;Tyrosine--tRNA ligase, cytoplasmic, N-terminally processed	YARS
Q9Y5A9	YTH domain-containing family protein 2	YTHDF2			x
P61981	14-3-3 protein gamma;14-3-3 protein gamma, N-terminally processed	YWHAG
