# Supplementary material for: Comprehensive in vivo identification of the c-Myc mRNA protein interactome using HyPR-MS
Source: RNA. 2019 Oct;25(10):1337–52. doi: 10.1261/rna.072157.119 (PMC6800478; doi:10.1261/rna.072157.119)
Supplement: Supplemental Material [file supp_072157.119_Supplemental_Table_S2.xlsx]

## Sheet: Table S2
Table S2: Gene Ontology Term Enrichment Analysis for c-Myc mRNA protein interactome.

## Sheet: Key
Gene Ontology Table Key:
GO biological process complete = GO analysis was run on terms related to biological process. The listed terms are accompanied by their GO reference number.
GO cellular component complete = GO analysis was run on terms related to cellular component. The listed terms are accompanied by their GO reference number.
GO molecular function complete = GO analysis was run on terms related to molecular function. The listed terms are accompanied by their GO reference number.
Homo sapiens - REFLIST (21002) = the total number of genes present in the GO database that are associated with the listed term
c-Myc RBPs enriched = the observed number of proteins within the input list that are associated with the listed term
c-Myc RBPs enriched (expected) = the expected number of proteins that would be present in the input list if its combination of proteins was completely random
c-Myc RBPs enriched (over/under) = a binary measure of whether the observed enrichment in the input list is higher (+) or lower (-) than the expected enrichment
c-Myc RBPs enriched (fold Enrichment) = the degree to which enrichment was observed; a fold enrichment higher than 1 indicates a higher-than-expected enrichment, while a fold enrichment lower than 1 indicates a lower-than-expected enrichment
c-Myc RBPs enriched (P-value) = the likelihood that the observed fold enrichment occurred due to random chance; in this case, a p-value less than 0.05 was considered significant and that the corresponding term was not enriched by chance

## Sheet: c-Myc RBPs biological processes
Analysis Type:	PANTHER Overrepresentation Test (Released 20181113)
Annotation Version and Release Date:	GO Ontology database Released 2018-12-01
Analyzed List:	upload_1 (Homo sapiens)
Reference List:	Homo sapiens (all genes in database)
Test Type:	FISHER
Correction:	BONFERRONI
Bonferroni count:	8723
GO biological process complete	Homo sapiens - REFLIST (20996)	upload_1 (234)	upload_1 (expected)	upload_1 (over/under)	upload_1 (fold Enrichment)	upload_1 (P-value)
positive regulation of protein localization to Cajal body (GO:1904871)	9	7	0.1	+	69.79	1.66e-06
regulation of protein localization to Cajal body (GO:1904869)	9	7	0.1	+	69.79	1.66e-06
positive regulation of establishment of protein localization to telomere (GO:1904851)	10	7	0.11	+	62.81	2.79e-06
regulation of establishment of protein localization to telomere (GO:0070203)	11	7	0.12	+	57.1	4.52e-06
regulation of establishment of protein localization to chromosome (GO:0070202)	12	7	0.13	+	52.34	7.1e-06
positive regulation of protein localization to chromosome, telomeric region (GO:1904816)	13	7	0.14	+	48.31	1.08e-05
positive regulation of telomerase RNA localization to Cajal body (GO:1904874)	15	8	0.17	+	47.85	7.17e-07
regulation of protein localization to chromosome, telomeric region (GO:1904814)	15	7	0.17	+	41.87	2.33e-05
regulation of telomerase RNA localization to Cajal body (GO:1904872)	18	8	0.2	+	39.88	2.22e-06
SRP-dependent cotranslational protein targeting to membrane (GO:0006614)	97	39	1.08	+	36.08	1.09e-40
cotranslational protein targeting to membrane (GO:0006613)	102	39	1.14	+	34.31	5.4e-40
protein targeting to ER (GO:0045047)	109	39	1.21	+	32.1	4.55e-39
ribosomal large subunit assembly (GO:0000027)	31	11	0.35	+	31.84	6.37e-09
establishment of protein localization to endoplasmic reticulum (GO:0072599)	113	40	1.26	+	31.76	5.15e-40
nuclear-transcribed mRNA catabolic process, nonsense-mediated decay (GO:0000184)	120	40	1.34	+	29.91	3.79e-39
protein localization to endoplasmic reticulum (GO:0070972)	137	41	1.53	+	26.85	1.29e-38
translational initiation (GO:0006413)	146	43	1.63	+	26.43	1.91e-40
ribosomal large subunit biogenesis (GO:0042273)	73	20	0.81	+	24.58	1.4e-16
cytoplasmic translation (GO:0002181)	70	19	0.78	+	24.35	1.52e-15
protein targeting to membrane (GO:0006612)	160	39	1.78	+	21.87	1.35e-33
proteasomal ubiquitin-independent protein catabolic process (GO:0010499)	25	6	0.28	+	21.53	0.00858
ribosome assembly (GO:0042255)	66	14	0.74	+	19.03	1.83e-09
positive regulation of telomere maintenance via telomerase (GO:0032212)	34	7	0.38	+	18.47	0.00258
nuclear-transcribed mRNA catabolic process (GO:0000956)	195	40	2.17	+	18.41	5.61e-32
citrate metabolic process (GO:0006101)	36	7	0.4	+	17.45	0.00362
cellular response to interleukin-7 (GO:0098761)	31	6	0.35	+	17.37	0.0256
response to interleukin-7 (GO:0098760)	31	6	0.35	+	17.37	0.0256
mRNA catabolic process (GO:0006402)	211	40	2.35	+	17.01	8.58e-31
positive regulation of telomere maintenance via telomere lengthening (GO:1904358)	37	7	0.41	+	16.98	0.00427
response to interleukin-4 (GO:0070670)	32	6	0.36	+	16.82	0.0301
tricarboxylic acid metabolic process (GO:0072350)	40	7	0.45	+	15.7	0.00681
tRNA aminoacylation for protein translation (GO:0006418)	46	8	0.51	+	15.6	0.00113
tricarboxylic acid cycle (GO:0006099)	35	6	0.39	+	15.38	0.0478
RNA catabolic process (GO:0006401)	242	41	2.7	+	15.2	6.38e-30
tRNA aminoacylation (GO:0043039)	49	8	0.55	+	14.65	0.00175
amino acid activation (GO:0043038)	50	8	0.56	+	14.36	0.00201
establishment of protein localization to membrane (GO:0090150)	260	41	2.9	+	14.15	8.22e-29
translation (GO:0006412)	395	58	4.4	+	13.18	4.75e-41
positive regulation of telomere maintenance (GO:0032206)	50	7	0.56	+	12.56	0.0261
peptide biosynthetic process (GO:0043043)	418	58	4.66	+	12.45	8.4e-40
regulation of telomere maintenance via telomerase (GO:0032210)	55	7	0.61	+	11.42	0.0463
amide biosynthetic process (GO:0043604)	529	67	5.9	+	11.36	1.41e-44
protein targeting (GO:0006605)	352	43	3.92	+	10.96	2.94e-26
ribosome biogenesis (GO:0042254)	292	34	3.25	+	10.45	2.11e-19
nucleobase-containing compound catabolic process (GO:0034655)	405	47	4.51	+	10.41	3.61e-28
aerobic respiration (GO:0009060)	72	8	0.8	+	9.97	0.0247
peptide metabolic process (GO:0006518)	556	60	6.2	+	9.68	1.22e-35
establishment of protein localization to organelle (GO:0072594)	432	46	4.81	+	9.55	5.45e-26
rRNA processing (GO:0006364)	207	22	2.31	+	9.54	9.55e-11
heterocycle catabolic process (GO:0046700)	454	48	5.06	+	9.49	3.57e-27
cellular nitrogen compound catabolic process (GO:0044270)	455	48	5.07	+	9.47	3.91e-27
aromatic compound catabolic process (GO:0019439)	469	48	5.23	+	9.18	1.38e-26
ribonucleoprotein complex assembly (GO:0022618)	227	23	2.53	+	9.09	5.91e-11
ribonucleoprotein complex subunit organization (GO:0071826)	241	24	2.69	+	8.94	2.12e-11
ribonucleoprotein complex biogenesis (GO:0022613)	445	43	4.96	+	8.67	1.8e-22
organic cyclic compound catabolic process (GO:1901361)	503	48	5.61	+	8.56	2.51e-25
nucleosome assembly (GO:0006334)	116	11	1.29	+	8.51	0.00146
protein folding (GO:0006457)	222	21	2.47	+	8.49	3.18e-09
rRNA metabolic process (GO:0016072)	233	22	2.6	+	8.47	8.83e-10
cellular amide metabolic process (GO:0043603)	797	72	8.88	+	8.11	3.59e-39
protein localization to membrane (GO:0072657)	477	42	5.32	+	7.9	2.09e-20
chromatin assembly (GO:0031497)	133	11	1.48	+	7.42	0.0052
mRNA metabolic process (GO:0016071)	682	55	7.6	+	7.24	3.16e-26
regulation of protein localization to nucleus (GO:1900180)	125	10	1.39	+	7.18	0.0225
protein stabilization (GO:0050821)	174	13	1.94	+	6.7	0.00146
nucleosome organization (GO:0034728)	153	11	1.71	+	6.45	0.0188
chromatin assembly or disassembly (GO:0006333)	154	11	1.72	+	6.41	0.02
protein localization to organelle (GO:0033365)	719	50	8.01	+	6.24	1.04e-20
purine ribonucleotide biosynthetic process (GO:0009152)	184	12	2.05	+	5.85	0.0169
cellular macromolecule catabolic process (GO:0044265)	869	56	9.68	+	5.78	3.52e-22
ncRNA processing (GO:0034470)	379	24	4.22	+	5.68	1.91e-07
purine nucleotide biosynthetic process (GO:0006164)	193	12	2.15	+	5.58	0.027
regulation of translation (GO:0006417)	341	21	3.8	+	5.53	5.84e-06
ribonucleotide biosynthetic process (GO:0009260)	198	12	2.21	+	5.44	0.0346
DNA conformation change (GO:0071103)	250	15	2.79	+	5.38	0.00239
ncRNA metabolic process (GO:0034660)	537	32	5.98	+	5.35	3.23e-10
ribose phosphate biosynthetic process (GO:0046390)	204	12	2.27	+	5.28	0.0462
intracellular protein transport (GO:0006886)	1003	57	11.18	+	5.1	4.39e-20
macromolecule catabolic process (GO:0009057)	1008	57	11.23	+	5.07	5.54e-20
regulation of cellular amide metabolic process (GO:0034248)	407	23	4.54	+	5.07	4.24e-06
organonitrogen compound biosynthetic process (GO:1901566)	1428	80	15.92	+	5.03	3.78e-30
coenzyme metabolic process (GO:0006732)	314	16	3.5	+	4.57	0.00759
regulation of protein stability (GO:0031647)	276	14	3.08	+	4.55	0.0391
cellular amino acid metabolic process (GO:0006520)	321	16	3.58	+	4.47	0.00999
cellular protein-containing complex assembly (GO:0034622)	826	41	9.21	+	4.45	2.14e-11
posttranscriptional regulation of gene expression (GO:0010608)	463	22	5.16	+	4.26	0.000207
cellular nitrogen compound biosynthetic process (GO:0044271)	1674	77	18.66	+	4.13	2.43e-23
neutrophil degranulation (GO:0043312)	483	22	5.38	+	4.09	0.000422
neutrophil activation involved in immune response (GO:0002283)	487	22	5.43	+	4.05	0.000485
neutrophil mediated immunity (GO:0002446)	494	22	5.51	+	4	0.000616
neutrophil activation (GO:0042119)	495	22	5.52	+	3.99	0.000637
granulocyte activation (GO:0036230)	500	22	5.57	+	3.95	0.000753
RNA metabolic process (GO:0016070)	1672	73	18.63	+	3.92	1.78e-20
leukocyte degranulation (GO:0043299)	505	22	5.63	+	3.91	0.000889
protein-containing complex assembly (GO:0065003)	1533	66	17.09	+	3.86	1.18e-17
RNA processing (GO:0006396)	860	37	9.58	+	3.86	3.52e-08
myeloid leukocyte mediated immunity (GO:0002444)	515	22	5.74	+	3.83	0.00123
protein transport (GO:0015031)	1499	64	16.71	+	3.83	8.81e-17
myeloid cell activation involved in immune response (GO:0002275)	518	22	5.77	+	3.81	0.00135
purine ribonucleotide metabolic process (GO:0009150)	424	18	4.73	+	3.81	0.0191
cellular catabolic process (GO:0044248)	1731	73	19.29	+	3.78	1.31e-19
peptide transport (GO:0015833)	1523	64	16.97	+	3.77	1.94e-16
intracellular transport (GO:0046907)	1547	65	17.24	+	3.77	9.02e-17
cellular macromolecule biosynthetic process (GO:0034645)	1700	71	18.95	+	3.75	1.12e-18
establishment of protein localization (GO:0045184)	1582	66	17.63	+	3.74	5.97e-17
gene expression (GO:0010467)	2003	83	22.32	+	3.72	1.05e-22
ribose phosphate metabolic process (GO:0019693)	459	19	5.12	+	3.71	0.0142
amide transport (GO:0042886)	1552	64	17.3	+	3.7	4.95e-16
ribonucleotide metabolic process (GO:0009259)	440	18	4.9	+	3.67	0.0315
cellular protein localization (GO:0034613)	1567	64	17.46	+	3.66	7.97e-16
cellular macromolecule localization (GO:0070727)	1575	64	17.55	+	3.65	1.02e-15
macromolecule biosynthetic process (GO:0009059)	1754	71	19.55	+	3.63	6.34e-18
purine nucleotide metabolic process (GO:0006163)	445	18	4.96	+	3.63	0.0366
nucleotide metabolic process (GO:0009117)	582	23	6.49	+	3.55	0.00238
organic substance catabolic process (GO:1901575)	1703	67	18.98	+	3.53	5.72e-16
purine-containing compound metabolic process (GO:0072521)	486	19	5.42	+	3.51	0.0316
nucleoside phosphate metabolic process (GO:0006753)	589	23	6.56	+	3.5	0.00291
regulated exocytosis (GO:0045055)	693	27	7.72	+	3.5	0.000269
myeloid leukocyte activation (GO:0002274)	572	22	6.37	+	3.45	0.00678
cofactor metabolic process (GO:0051186)	497	19	5.54	+	3.43	0.043
nucleic acid metabolic process (GO:0090304)	2309	88	25.73	+	3.42	5.14e-22
protein-containing complex subunit organization (GO:0043933)	1810	68	20.17	+	3.37	3.01e-15
leukocyte activation involved in immune response (GO:0002366)	613	23	6.83	+	3.37	0.00568
catabolic process (GO:0009056)	1973	74	21.99	+	3.37	4.84e-17
nucleobase-containing compound metabolic process (GO:0006139)	2949	110	32.87	+	3.35	3.89e-29
cell activation involved in immune response (GO:0002263)	617	23	6.88	+	3.34	0.00633
carboxylic acid metabolic process (GO:0019752)	894	33	9.96	+	3.31	2.47e-05
establishment of localization in cell (GO:0051649)	1789	66	19.94	+	3.31	2.95e-14
heterocycle metabolic process (GO:0046483)	3116	114	34.73	+	3.28	6.89e-30
nitrogen compound transport (GO:0071705)	1810	65	20.17	+	3.22	2.13e-13
nucleobase-containing small molecule metabolic process (GO:0055086)	676	24	7.53	+	3.19	0.00826
cellular component biogenesis (GO:0044085)	2678	95	29.85	+	3.18	3.96e-22
cellular aromatic compound metabolic process (GO:0006725)	3163	112	35.25	+	3.18	7.13e-28
drug metabolic process (GO:0017144)	651	23	7.26	+	3.17	0.0153
negative regulation of gene expression (GO:0010629)	1689	59	18.82	+	3.13	3.23e-11
organic acid metabolic process (GO:0006082)	1005	35	11.2	+	3.12	3.32e-05
cellular nitrogen compound metabolic process (GO:0034641)	3591	125	40.02	+	3.12	5.33e-32
organic cyclic compound metabolic process (GO:1901360)	3379	117	37.66	+	3.11	8.56e-29
exocytosis (GO:0006887)	781	27	8.7	+	3.1	0.00273
protein localization (GO:0008104)	2111	72	23.53	+	3.06	3.37e-14
macromolecule localization (GO:0033036)	2442	82	27.22	+	3.01	1.38e-16
oxoacid metabolic process (GO:0043436)	984	33	10.97	+	3.01	0.000234
organic substance biosynthetic process (GO:1901576)	2884	95	32.14	+	2.96	8.6e-20
cellular biosynthetic process (GO:0044249)	2780	91	30.98	+	2.94	1.97e-18
biosynthetic process (GO:0009058)	2942	96	32.79	+	2.93	8.59e-20
interspecies interaction between organisms (GO:0044419)	736	24	8.2	+	2.93	0.0342
organic substance transport (GO:0071702)	2179	70	24.28	+	2.88	2.48e-12
cellular localization (GO:0051641)	2388	75	26.61	+	2.82	4.61e-13
cellular component assembly (GO:0022607)	2454	75	27.35	+	2.74	1.99e-12
secretion by cell (GO:0032940)	978	29	10.9	+	2.66	0.02
secretion (GO:0046903)	1092	31	12.17	+	2.55	0.0208
cellular protein metabolic process (GO:0044267)	3679	104	41	+	2.54	2.22e-17
small molecule metabolic process (GO:0044281)	1816	49	20.24	+	2.42	7.22e-05
negative regulation of macromolecule metabolic process (GO:0010605)	2589	69	28.85	+	2.39	3.86e-08
transport (GO:0006810)	4430	111	49.37	+	2.25	6.47e-15
protein metabolic process (GO:0019538)	4365	108	48.65	+	2.22	6.03e-14
negative regulation of metabolic process (GO:0009892)	2831	70	31.55	+	2.22	7.04e-07
establishment of localization (GO:0051234)	4552	112	50.73	+	2.21	1.63e-14
organonitrogen compound metabolic process (GO:1901564)	5467	132	60.93	+	2.17	1.71e-18
cellular macromolecule metabolic process (GO:0044260)	5040	118	56.17	+	2.1	4.12e-14
cellular metabolic process (GO:0044237)	7604	171	84.75	+	2.02	5.5e-26
nitrogen compound metabolic process (GO:0006807)	7167	160	79.88	+	2	3.57e-22
macromolecule metabolic process (GO:0043170)	6240	139	69.54	+	2	1.18e-16
primary metabolic process (GO:0044238)	7665	167	85.43	+	1.95	5.15e-23
organic substance metabolic process (GO:0071704)	7991	172	89.06	+	1.93	9.35e-24
localization (GO:0051179)	5607	119	62.49	+	1.9	7.45e-11
metabolic process (GO:0008152)	8445	176	94.12	+	1.87	3.82e-23
response to organic substance (GO:0010033)	2869	59	31.97	+	1.85	0.0294
cellular component organization or biogenesis (GO:0071840)	5714	117	63.68	+	1.84	2.31e-09
regulation of gene expression (GO:0010468)	4396	86	48.99	+	1.76	0.000373
regulation of macromolecule metabolic process (GO:0060255)	6052	114	67.45	+	1.69	2.12e-06
regulation of metabolic process (GO:0019222)	6571	122	73.23	+	1.67	5.19e-07
cellular component organization (GO:0016043)	5531	99	61.64	+	1.61	0.00125
cellular process (GO:0009987)	14385	228	160.32	+	1.42	1.86e-25
biological_process (GO:0008150)	17746	232	197.78	+	1.17	1.37e-10

## Sheet: c-Myc RBPs cellular component
Analysis Type:	PANTHER Overrepresentation Test (Released 20181113)
Annotation Version and Release Date:	GO Ontology database Released 2018-12-01
Analyzed List:	upload_1 (Homo sapiens)
Reference List:	Homo sapiens (all genes in database)
Test Type:	FISHER
Correction:	BONFERRONI
Bonferroni count:	1421
GO cellular component complete	Homo sapiens - REFLIST (20996)	upload_1 (234)	upload_1 (expected)	upload_1 (over/under)	upload_1 (fold Enrichment)	upload_1 (P-value)
chaperonin-containing T-complex (GO:0005832)	11	7	0.12	+	57.1	7.37e-07
box C/D snoRNP complex (GO:0031428)	7	4	0.08	+	51.27	0.00635
zona pellucida receptor complex (GO:0002199)	7	4	0.08	+	51.27	0.00635
cytosolic large ribosomal subunit (GO:0022625)	67	30	0.75	+	40.18	2.05e-32
chaperone complex (GO:0101031)	22	9	0.25	+	36.71	4.78e-08
MCM complex (GO:0042555)	11	4	0.12	+	32.63	0.0254
cytosolic ribosome (GO:0022626)	119	43	1.33	+	32.42	2.02e-44
polysomal ribosome (GO:0042788)	31	9	0.35	+	26.05	5.94e-07
cytosolic small ribosomal subunit (GO:0022627)	47	13	0.52	+	24.82	1.18e-10
proteasome core complex (GO:0005839)	22	6	0.25	+	24.47	0.000735
large ribosomal subunit (GO:0015934)	126	30	1.4	+	21.36	1.4e-25
ribosomal subunit (GO:0044391)	199	43	2.22	+	19.39	2.7e-36
cytosolic part (GO:0044445)	255	52	2.84	+	18.3	1.6e-43
ribosome (GO:0005840)	246	45	2.74	+	16.41	2.54e-35
polysome (GO:0005844)	74	13	0.82	+	15.76	1.79e-08
small ribosomal subunit (GO:0015935)	76	13	0.85	+	15.35	2.42e-08
melanosome (GO:0042470)	106	15	1.18	+	12.7	7.49e-09
pigment granule (GO:0048770)	106	15	1.18	+	12.7	7.49e-09
nucleosome (GO:0000786)	74	10	0.82	+	12.13	4.2e-05
DNA packaging complex (GO:0044815)	82	10	0.91	+	10.94	0.000102
proteasome complex (GO:0000502)	67	8	0.75	+	10.71	0.00245
endopeptidase complex (GO:1905369)	68	8	0.76	+	10.56	0.00272
myelin sheath (GO:0043209)	167	18	1.86	+	9.67	3.57e-09
catalytic step 2 spliceosome (GO:0071013)	87	8	0.97	+	8.25	0.0146
azurophil granule lumen (GO:0035578)	90	8	1	+	7.98	0.0184
ribonucleoprotein complex (GO:1990904)	866	76	9.65	+	7.87	1.03e-41
peptidase complex (GO:1905368)	95	8	1.06	+	7.56	0.0265
focal adhesion (GO:0005925)	404	33	4.5	+	7.33	3.58e-15
cell-substrate adherens junction (GO:0005924)	407	33	4.54	+	7.28	4.4e-15
ficolin-1-rich granule (GO:0101002)	124	10	1.38	+	7.24	0.00343
ficolin-1-rich granule lumen (GO:1904813)	124	10	1.38	+	7.24	0.00343
cell-substrate junction (GO:0030055)	411	33	4.58	+	7.2	5.78e-15
protein-DNA complex (GO:0032993)	171	13	1.91	+	6.82	0.000197
cytoplasmic vesicle lumen (GO:0060205)	336	24	3.74	+	6.41	2.88e-09
vesicle lumen (GO:0031983)	337	24	3.76	+	6.39	3.06e-09
secretory granule lumen (GO:0034774)	320	21	3.57	+	5.89	3.2e-07
azurophil granule (GO:0042582)	154	10	1.72	+	5.83	0.0207
primary lysosome (GO:0005766)	154	10	1.72	+	5.83	0.0207
adherens junction (GO:0005912)	539	33	6.01	+	5.49	9.77e-12
anchoring junction (GO:0070161)	555	33	6.19	+	5.34	2.14e-11
cytoplasmic ribonucleoprotein granule (GO:0036464)	207	12	2.31	+	5.2	0.00866
extracellular exosome (GO:0070062)	2095	117	23.35	+	5.01	8.03e-50
extracellular vesicle (GO:1903561)	2116	117	23.58	+	4.96	2.2e-49
extracellular organelle (GO:0043230)	2118	117	23.61	+	4.96	2.42e-49
ribonucleoprotein granule (GO:0035770)	219	12	2.44	+	4.92	0.0149
nucleolus (GO:0005730)	942	40	10.5	+	3.81	1.01e-09
extracellular space (GO:0005615)	3334	124	37.16	+	3.34	2.69e-35
extracellular region part (GO:0044421)	3528	124	39.32	+	3.15	7.98e-33
vesicle (GO:0031982)	3803	129	42.38	+	3.04	3.56e-33
secretory granule (GO:0030141)	840	27	9.36	+	2.88	0.00174
intracellular non-membrane-bounded organelle (GO:0043232)	4227	127	47.11	+	2.7	3.99e-27
cytosol (GO:0005829)	5094	153	56.77	+	2.69	1.44e-36
non-membrane-bounded organelle (GO:0043228)	4235	127	47.2	+	2.69	4.8e-27
extracellular region (GO:0005576)	4342	125	48.39	+	2.58	1.07e-24
secretory vesicle (GO:0099503)	992	28	11.06	+	2.53	0.0121
cell junction (GO:0030054)	1281	36	14.28	+	2.52	0.000594
protein-containing complex (GO:0032991)	5388	151	60.05	+	2.51	4.23e-32
synapse (GO:0045202)	1187	33	13.23	+	2.49	0.00368
organelle lumen (GO:0043233)	5246	140	58.47	+	2.39	5.89e-26
intracellular organelle lumen (GO:0070013)	5246	140	58.47	+	2.39	5.89e-26
membrane-enclosed lumen (GO:0031974)	5246	140	58.47	+	2.39	5.89e-26
nuclear part (GO:0044428)	4491	113	50.05	+	2.26	3.19e-16
nuclear lumen (GO:0031981)	4103	103	45.73	+	2.25	5.55e-14
cytoplasmic vesicle part (GO:0044433)	1486	37	16.56	+	2.23	0.00724
nucleoplasm (GO:0005654)	3489	76	38.88	+	1.95	4.73e-06
cytoplasmic vesicle (GO:0031410)	2302	50	25.66	+	1.95	0.00665
intracellular vesicle (GO:0097708)	2305	50	25.69	+	1.95	0.00679
intracellular organelle part (GO:0044446)	9273	194	103.35	+	1.88	1.27e-30
cytoplasmic part (GO:0044444)	9709	199	108.21	+	1.84	1.88e-31
nucleus (GO:0005634)	7390	151	82.36	+	1.83	3.03e-16
organelle part (GO:0044422)	9574	195	106.7	+	1.83	3.77e-29
cytoplasm (GO:0005737)	11567	210	128.91	+	1.63	2.77e-27
membrane-bounded organelle (GO:0043227)	12489	217	139.19	+	1.56	3.78e-27
intracellular membrane-bounded organelle (GO:0043231)	10981	188	122.38	+	1.54	1.17e-15
intracellular organelle (GO:0043229)	12763	210	142.24	+	1.48	9.17e-20
organelle (GO:0043226)	13591	223	151.47	+	1.47	7.47e-26
intracellular (GO:0005622)	14540	230	162.05	+	1.42	1.12e-27
intracellular part (GO:0044424)	14540	230	162.05	+	1.42	1.12e-27
cell part (GO:0044464)	17014	231	189.62	+	1.22	4.96e-14
cell (GO:0005623)	17077	231	190.32	+	1.21	7.94e-14
cellular_component (GO:0005575)	18817	233	209.72	+	1.11	5.25e-07
membrane part (GO:0044425)	7227	48	80.54	-	0.6	0.00598
intrinsic component of membrane (GO:0031224)	5927	26	66.06	-	0.39	6.04e-07
integral component of membrane (GO:0016021)	5772	25	64.33	-	0.39	7.33e-07
integral component of plasma membrane (GO:0005887)	1646	3	18.34	-	0.16	0.0279
intrinsic component of plasma membrane (GO:0031226)	1726	3	19.24	-	0.16	0.00857

## Sheet: c-Myc RBPs molecular function
Analysis Type:	PANTHER Overrepresentation Test (Released 20181113)
Annotation Version and Release Date:	GO Ontology database Released 2018-12-01
Analyzed List:	upload_1 (Homo sapiens)
Reference List:	Homo sapiens (all genes in database)
Test Type:	FISHER
Correction:	BONFERRONI
Bonferroni count:	2782
GO molecular function complete	Homo sapiens - REFLIST (20996)	upload_1 (234)	upload_1 (expected)	upload_1 (over/under)	upload_1 (fold Enrichment)	upload_1 (P-value)
large ribosomal subunit rRNA binding (GO:0070180)	7	6	0.08	+	76.91	7.53e-06
threonine-type peptidase activity (GO:0070003)	23	6	0.26	+	23.41	0.0018
threonine-type endopeptidase activity (GO:0004298)	23	6	0.26	+	23.41	0.0018
structural constituent of ribosome (GO:0003735)	172	41	1.92	+	21.39	1.14e-35
rRNA binding (GO:0019843)	63	12	0.7	+	17.09	9.55e-08
ligase activity, forming carbon-oxygen bonds (GO:0016875)	42	8	0.47	+	17.09	0.000194
aminoacyl-tRNA ligase activity (GO:0004812)	42	8	0.47	+	17.09	0.000194
nucleosomal DNA binding (GO:0031492)	44	7	0.49	+	14.27	0.00385
unfolded protein binding (GO:0051082)	131	17	1.46	+	11.64	1.92e-09
cadherin binding (GO:0045296)	314	33	3.5	+	9.43	5.79e-18
RNA binding (GO:0003723)	1661	132	18.51	+	7.13	3.17e-76
ligase activity (GO:0016874)	156	12	1.74	+	6.9	0.00105
cell adhesion molecule binding (GO:0050839)	482	36	5.37	+	6.7	2.63e-15
mRNA binding (GO:0003729)	243	15	2.71	+	5.54	0.00054
structural molecule activity (GO:0005198)	835	46	9.31	+	4.94	2.19e-15
catalytic activity, acting on RNA (GO:0140098)	365	16	4.07	+	3.93	0.0154
nucleic acid binding (GO:0003676)	4125	146	45.97	+	3.18	4.37e-42
adenyl nucleotide binding (GO:0030554)	1569	48	17.49	+	2.74	5.95e-07
adenyl ribonucleotide binding (GO:0032559)	1556	47	17.34	+	2.71	1.44e-06
ATP binding (GO:0005524)	1498	45	16.7	+	2.7	4.29e-06
drug binding (GO:0008144)	1755	52	19.56	+	2.66	2.7e-07
heterocyclic compound binding (GO:1901363)	6058	175	67.52	+	2.59	1.15e-43
nucleoside phosphate binding (GO:1901265)	2169	62	24.17	+	2.56	1.07e-08
organic cyclic compound binding (GO:0097159)	6144	175	68.47	+	2.56	9.31e-43
purine ribonucleoside triphosphate binding (GO:0035639)	1848	52	20.6	+	2.52	2.35e-06
nucleotide binding (GO:0000166)	2168	61	24.16	+	2.52	4.5e-08
purine nucleotide binding (GO:0017076)	1928	54	21.49	+	2.51	1.08e-06
purine ribonucleotide binding (GO:0032555)	1913	53	21.32	+	2.49	2.15e-06
ribonucleotide binding (GO:0032553)	1928	53	21.49	+	2.47	2.66e-06
small molecule binding (GO:0036094)	2550	70	28.42	+	2.46	1.78e-09
carbohydrate derivative binding (GO:0097367)	2241	57	24.98	+	2.28	1.02e-05
anion binding (GO:0043168)	2803	70	31.24	+	2.24	1.63e-07
protein binding (GO:0005515)	11862	204	132.2	+	1.54	2.25e-20
binding (GO:0005488)	15167	225	169.04	+	1.33	5.75e-18
molecular_function (GO:0003674)	17690	232	197.15	+	1.18	2.79e-11
signaling receptor activity (GO:0038023)	1521	1	16.95	-	0.06	0.00318
molecular transducer activity (GO:0060089)	1580	1	17.61	-	0.06	0.00134
