# Supplementary material for: Comprehensive in vivo identification of the c-Myc mRNA protein interactome using HyPR-MS
Source: RNA. 2019 Oct;25(10):1337–52. doi: 10.1261/rna.072157.119 (PMC6800478; doi:10.1261/rna.072157.119)
Supplement: Supplemental Material [file supp_072157.119_Supplemental_Table_S3.xlsx]

## Sheet: c-Myc interactome
		INFORMATION RELATED TO THE STRUCTURE OF THE IDENTIFIED PROTEINS								FUNCTIONAL INFORMATION OF THE IDENTIFIED PROTEINS
		SPECIFIC STRUCTURAL INFORMATION				PROTEINS BELONGING IN ENRICHED GO TERMS GROUPS				PROTEINS BELONGING IN ENRICHED GO TERMS																				PROTEINS IDENTIFIED BY MASS SPECTROMETRY WORKS OF SPECIFIC STRUCTURES									OTHERS
Protein Name		Known c-Myc mRNA Interactor	Interacts with a known interactor	Domain types by Uniprot (the underlined domains are able to interact with RNA)	Complexe type (the underlined are complexes containing structurally RNA molecules or able to link them)	RNA binding	mRNA binding	ribonucleotide binding	ribonucleoprotein complex	RNA metabolic process	mRNA metabolis process	ribonucleotide metabolic process	catalytic activity acting on RNA	mRNA catabolic process or mRNA decay	Ribosome biogenesis	regulation of translation	Translational initiation	Translation	tRNA aminoacylation for protein translation	Protein folding	Chaperonin-containing T- complex	rRNA processing	Nucleolus	cytoplasmic ribonucleoprotein granule	Polysome	ribosome component	catalytic step 2 spliceosome	intracellular vesicle	extracellular vesicle or exosome	Spliceosome (Rappsilber et al., 2002; Behzadnia et al., 2007)	mRNA 3′ processing complexe	Speckle components (Saitoh et al., 2004; Galganski et al., 2017)	known interactors of a Speckle protein components (Galganski et al., 2017)	Nucleolus (Boisvert et al., 2011; Scherl et al., 2002; Anderson et al., 2002)	40S ribosome subunit ( van de Waterbeemd et al., 2018)	60S ribosome subunit ( van de Waterbeemd et al., 2018)	P-bodies (Hubstenberger et al., 2017)	Stress Granule (Jain et al., 2016)	Perinuclear region of cytoplasm (not enriched GO Term)	Nucleolar proteins present in our list and part of 40S ribosomal subunit (van de Waterbeemd et al., 2018)	Nucleolar proteins present in our list and part of 60S ribosomal subunit (van de Waterbeemd et al., 2018)
Alanine--tRNA ligase, cytoplasmic	AARS			tRNA synthetase (Jankowsky and Harris, 2015) and DHHA1 domains		x		x		x			x			x		x	x										x
Acetyl-CoA acetyltransferase, mitochondrial	ACAT1							x				x																	x
ATP-citrate synthase	ACLY							x				x																x	x
Aconitate hydratase, mitochondrial	ACO2		Interacts with RPL11 (Biogrid)
Alpha-actinin-4	ACTN4		Interacts with ELAVL1 (Biogrid)	CH, EF hand, calponin homology, repeat domains	IGF2BP1-dependent mRNP granule complex containing untranslated mRNAs ; CART complex	x			x																			x	x										x
Adenosylhomocysteinase	AHCY																											x	x
Neuroblast differentiation-associated protein AHNAK	AHNAK			PDZ domain, repeat domains		x																							x
Adenylate kinase 2, mitochondrial;Adenylate kinase 2, mitochondrial, N-terminally processed	AK2			CORE domain, NMPbind domain, LID domain				x				x																	x
Arachidonate 12-lipoxygenase, 12R-type	ALOX12B			PLAT domain
AP-2 complex subunit beta	AP2B1			TBP domain	AP2 complex																							x					x
Arginase-1	ARG1				N/A																							x	x								x
Bifunctional purine biosynthesis protein PURH;Phosphoribosylaminoimidazolecarboxamide formyltransferase;IMP cyclohydrolase	ATIC											x																	x
Zinc-alpha-2-glycoprotein	AZGP1			Ig-like C1-type domain	N/A					x			x																x								x
Flavin reductase (NADPH)	BLVRB																												x
Ribosome biogenesis protein BRX1 homolog	BRIX1		Interacts with RPL11 (Biogrid)	Brix domain		x									x								x											x			x
Calnexin	CANX		Interacts with ELAVL1 (Biogrid)		ribosome-translocon complex	x			x											x						x		x	x
F-actin-capping protein subunit alpha-1	CAPZA1		Interacts with ELAVL1 (Biogrid)		WASH complex																								x
T-complex protein 1 subunit beta	CCT2				BBS/CCT complex			x													x							x	x					x
T-complex protein 1 subunit gamma	CCT3				BBS/CCT complex	x		x												x	x								x									x
T-complex protein 1 subunit delta	CCT4				BBS/CCT complex	x		x												x	x							x	x
T-complex protein 1 subunit epsilon	CCT5				BBS/CCT complex	x	x	x												x	x		x						x					x
T-complex protein 1 subunit zeta	CCT6A					x		x												x	x								x									x
T-complex protein 1 subunit eta	CCT7							x												x	x								x
Hsp90 co-chaperone Cdc37;Hsp90 co-chaperone Cdc37, N-terminally processed	CDC37																			x									x				x
Clathrin heavy chain 1	CLTC			WD40-like domains (Jin et al., 2016)	TACC3/ch-TOG/clathrin complex	x																						x	x		x		x
Cytochrome c oxidase subunit 4 isoform 1, mitochondrial	COX4I1											x
Quinone oxidoreductase	CRYZ					x	x																						x
Citrate synthase, mitochondrial	CS					x																							x
Cathepsin D;Cathepsin D light chain;Cathepsin D heavy chain	CTSD																											x	x				x
Cytochrome c	CYCS											x
Aspartate--tRNA ligase, cytoplasmic	DARS			tRNA synthetase domains (Jankowsky and Harris, 2015)	complex grouping tRNA ligases (Jurkin et al. 2014)	x		x		x			x					x	x										x
Dolichyl-diphosphooligosaccharide--protein glycosyltransferase 48 kDa subunit	DDOST				OST complex																							x
ATP-dependent RNA helicase DDX1	DDX1			DEAD box helicase (Jankowsky and Harris, 2015), SPRY domain	tRNA-splicing ligase complex (Jurkin et al., 2014)	x		x	x	x	x		x			x								x						x								x
Probable ATP-dependent RNA helicase DDX17	DDX17		interacts with ELAVL1 (Biogrid)	DEAD box helicase (Jankowsky and Harris, 2015)	N/A	x		x		x	x		x		x							x	x									x		x
ATP-dependent RNA helicase DDX18	DDX18		interacts with ELAVL1 and with RPL11 (Biogrid)	DEAD box helicase (Jankowsky and Harris, 2015)		x		x					x										x											x			x
Pre-mRNA-splicing factor ATP-dependent RNA helicase DHX15	DHX15			DEAD box helicase (Jankowsky and Harris, 2015)	U11/U12 snRNPs (U12-type spliceosome)(Will et al., 2004), IL complex	x		x	x	x	x		x										x							x	x	x		x			x
Probable rRNA-processing protein EBP2	EBNA1BP2		Interacts with RPL11 (Biogrid)			x			x	x					x							x	x											x
Elongation factor 1-delta	EEF1D			Leucine-zipper region		x				x	x							x					x						x
Elongation factor 1-gamma	EEF1G					x												x															x
Eukaryotic translation initiation factor 2 subunit 3	EIF2S3		Interacts with ELAVL1 (Biogrid)		eIF2 complex	x		x									x	x											x
Putative eukaryotic translation initiation factor 2 subunit 3-like protein	EIF2S3L				eIF2 complex	x		x									x	x											x
Eukaryotic translation initiation factor 5B	EIF5B					x		x								x	x	x
Eukaryotic translation initiation factor 6	EIF6				RISC complex (Filipowicz et al., 2008)	x			x						x	x	x	x				x	x						x				x	x							x
ELAV-like protein 1	ELAVL1	interacts with the AREs within 3’ UTR of c-Myc mRNA (Raghavan et al., 2001)	interacts with IGF2BP1 and with YTHDF2 (Biogrid)	RRM domains (Jankowsky and Harris, 2015)	N/A	x	x		x	x	x					x								x						x		x					x	x
Emerin	EMD			LEM domain																													x
Bifunctional glutamate/proline--tRNA ligase;Glutamate--tRNA ligase;Proline--tRNA ligase	EPRS			WHEP-TRS domains (involved in RNA binding by Uniprot)	complex grouping tRNA ligases (Jurkin et al., 2014); GAIT complex	x		x	x	x			x			x		x	x
Extended synaptotagmin-1	ESYT1			SMP-LBD domain, C2 domains
Electron transfer flavoprotein subunit alpha, mitochondrial	ETFA
Electron transfer flavoprotein subunit beta	ETFB																												x
Phenylalanine--tRNA ligase beta subunit	FARSB			tRNA synthetase domains (Jankowsky and Harris, 2015)		x		x		x			x					x	x
Fatty acid synthase;[Acyl-carrier-protein] S-acetyltransferase;[Acyl-carrier-protein] S-malonyltransferase;3-oxoacyl-[acyl-carrier-protein] synthase;3-oxoacyl-[acyl-carrier-protein] reductase;3-hydroxyacyl-[acyl-carrier-protein] dehydratase;Enoyl-[acyl-carrier-protein] reductase;Oleoyl-[acyl-carrier-protein] hydrolase	FASN					x						x																x	x
rRNA 2-O-methyltransferase fibrillarin	FBL		Interacts with RPL11 (Biogrid)		box C/D snoRNPs (Sharma et al., 2017), ribosomal and nucleolar protein complexes	x			x	x			x		x							x	x						x					x				x
Fermitin family homolog 3	FERMT3			FERM domain, PH domain																								x	x
Peptidyl-prolyl cis-trans isomerase FKBP4;Peptidyl-prolyl cis-trans isomerase FKBP4, N-terminally processed	FKBP4			PPIase domains, TPR domains	steroid hormone receptor complexes, HSP90 complex	x		x												x									x				x						x
Filamin-A	FLNA			filamin repeat domains		x				x	x												x						x				x						x
Filamin-C	FLNC			filamin repeat domains
Neutral alpha-glucosidase AB	GANAB					x																						x	x
Glycine--tRNA ligase	GARS			WHEP-TRS domain and tRNA synthetase domains (Jankowsky and Harris, 2015)				x		x		x	x					x	x									x	x
Rab GDP dissociation inhibitor beta	GDI2		Interacts with ELAVL1 (Biogrid)			x																						x	x
Gasdermin-A	GSDMA																																				x		x
Histone H1x	H1FX			H15 domain		x																	x															x
Histone H2A.V	H2AFV		Interacts with ELAVL1 (Biogrid)		nucleosome																								x									x
Histone H2A.Z	H2AFZ																												x
Very-long-chain (3R)-3-hydroxyacyl-CoA dehydratase 3	HACD3			CS domain	INSR complexes
Trifunctional enzyme subunit alpha, mitochondrial;Long-chain enoyl-CoA hydratase;Long chain 3-hydroxyacyl-CoA dehydrogenase	HADHA							x
Hemoglobin subunit alpha	HBA1								x																	x			x
Hemoglobin subunit gamma-1	HBG1							x				x																x
Histone H1.2	HIST1H1C			H15 domain		x
Histone H1.3	HIST1H1D			H15 domain	N/A	x																							x
Histone H1.4	HIST1H1E			H15 domain	N/A	x		x																					x
Histone H2B type 1-B	HIST1H2BB				nucleosome																								x
Histone H2B type 1-J	HIST1H2BJ				nucleosome																								x
Histone H2B type 1-O	HIST1H2BO				nucleosome																								x
Histone H2B type 2-E	HIST2H2BE				nucleosome																								x
High mobility group protein B2	HMGB2		interacts with ELAVL1 (Biogrid)		RAG complex, SET complex	x																	x																x
Hydroxymethylglutaryl-CoA synthase, cytoplasmic	HMGCS1											x
Non-histone chromosomal protein HMG-17	HMGN2					x																											x
Heterogeneous nuclear ribonucleoprotein A/B	HNRNPAB			RRM domains (Jankowsky and Harris, 2015)	IGF2BP1-dependent mRNP granule complex containing untranslated mRNAs	x	x		x																					x		x		x				x
Heterogeneous nuclear ribonucleoprotein R	HNRNPR			RRM domains, repeat domains (Jankowsky and Harris, 2015)	spliceosome C complex, mRNP granule complex	x	x		x	x	x					x											x			x							x
Putative heat shock protein HSP 90-beta 2	HSP90AB2P							x												x									x
Endoplasmin	HSP90B1				eIF2 complex, chaperone multiprotein complex	x		x												x								x	x										x
Heat shock 70 kDa protein 4	HSPA4							x																					x									x
10 kDa heat shock protein, mitochondrial	HSPE1					x		x												x									x
Heat shock protein 105 kDa	HSPH1							x												x								x	x			x
Isocitrate dehydrogenase [NADP] cytoplasmic	IDH1		Interacts with ELAVL1 (Biogrid)																									x	x
Insulin-like growth factor 2 mRNA-binding protein 1	IGF2BP1	Associates with a sequence in the open reading frame of c-Myc mRNA, termed the coding region determinant (Ioannidis et al., 2003; Weidensdorfer et al., 2009)	interacts with ELAVL1 (Biogrid)	RRM domains, KH domains (Jankowsky and Harris, 2015)	CRD complex, (Weidensdorfer et al., 2009), IGF2BP1-dependent mRNP granule complex comtaining untranslated mRNAs, ARC complex, TAU mRNP complex	x	x		x							x								x						x							x	x	x
Ig alpha-1 chain C region	IGHA1			Ig-like domains																									x								x
MICOS complex subunit MIC60	IMMT				MICOS complex, MIB complex	x
Inosine-5-monophosphate dehydrogenase 2	IMPDH2			CBS domains		x						x																x	x
Importin subunit alpha-1	KPNA2			IBB domain, ARM domains		x																											x	x				x
Importin subunit beta-1	KPNB1		Interacts with ELAVL1 (Biogrid)	HEAT domains (Jankowsky and Harris, 2015)	import snRNP complex, nuclear export receptor complex	x			x															x				x	x									x
Lamin-B receptor	LBR			Tudor domain (Ponting, 1997)		x																											x					x
Galectin-7	LGALS7																												x								x
Lon protease homolog, mitochondrial	LONP1					x		x
Leucine-rich repeat-containing protein 59	LRRC59			LRR repeat domains
Putative RNA-binding protein Luc7-like 2	LUC7L2		interacts with ELAVL1 (Biogrid)	Arg/Ser-rich domain	N/A	x	x		x	x	x																					x
Lysophospholipid acyltransferase 7	MBOAT7
DNA replication licensing factor MCM2	MCM2		Interacts with RPL11, YTHDF2 and RPS25 (Biogrid)	zinc finger domain (Jankowsky and Harris, 2015)	minichromosome maintenance complex			x																									x
DNA replication licensing factor MCM3	MCM3			zinc finger domain (Jankowsky and Harris, 2015)	minichromosome maintenance complex			x																															x
DNA replication licensing factor MCM6	MCM6			zinc finger domain (Jankowsky and Harris, 2015)	minichromosome maintenance complex			x
DNA replication licensing factor MCM7	MCM7			zinc finger domain (Jankowsky and Harris, 2015)	minichromosome maintenance complex			x																									x				x	x
Malate dehydrogenase, cytoplasmic	MDH1																												x
Malate dehydrogenase, mitochondrial	MDH2					x																							x
Myb-binding protein 1A	MYBBP1A		Interacts with RPL11 (Biogrid)		B-WICH complex	x																	x											x
F-box only protein 50	NCCRP1		interacts with ELAVL1 (Biogrid)	FBA domain																									x
Nucleolar and coiled-body phosphoprotein 1	NOLC1		Interacts with RPL11 (Biogrid)	LisH domain, acidic serine cluster repeat domains		x		x	x	x					x	x						x	x											x
Probable 28S rRNA (cytosine(4447)-C(5))-methyltransferase	NOP2		Interacts with RPL11 (Biogrid)			x				x			x		x							x	x
Nucleolar protein 56	NOP56		Interacts with RPL11, IGF2BP1 and RPS25 (Biogrid)	Nop domain	RNP complex, box C/D snoRNP particles	x			x	x					x							x	x											x			x
Nucleolar protein 58	NOP58		Interacts with RPL11 (Biogrid)	Nop domain	box C/D snoRNP particles	x			x	x					x							x	x											x			x	x
Nuclear migration protein nudC	NUDC			CS domain																x																		x
Ornithine aminotransferase, mitochondrial;Ornithine aminotransferase, hepatic form;Ornithine aminotransferase, renal form	OAT
Obg-like ATPase 1	OLA1			OBG-type G domain				x				x											x					x	x
Protein disulfide-isomerase	P4HB			thioredoxin domains		x														x								x	x					x
Proliferation-associated protein 2G4	PA2G4		Interacts with RPL11 (Biogrid)		ribonucleoprotein complex	x					x				x	x						x	x					x	x				x	x
Polyadenylate-binding protein 1	PABPC1		interacts with ELAVL1 and with RPL11 (Biogrid)	RRM domains (Jankowsky and Harris, 2015)	autoregulatory ribonucleoprotein complex (ARC), spliceosome C complex	x	x		x	x	x			x		x	x	x						x			x		x		x	x						x
Multifunctional protein ADE2;Phosphoribosylaminoimidazole-succinocarboxamide synthase;Phosphoribosylaminoimidazole carboxylase	PAICS							x				x																	x
Protein disulfide-isomerase A3	PDIA3			thioredoxin domains	TAP complex (PLC complex)	x														x								x	x				x
Protein disulfide-isomerase A6	PDIA6			thioredoxin domains	chaperone multiprotein complex															x								x	x
Phosphoglycerate mutase 1	PGAM1											x																x	x
Prohibitin	PHB																											x	x					x
Prohibitin-2	PHB2																																					x
Phosphatidylinositol-binding clathrin assembly protein	PICALM			ENTH domain																								x											x
Serine/threonine-protein phosphatase 2A 65 kDa regulatory subunit A alpha isoform	PPP2R1A		Interacts with ELAVL1 (Biogrid)	HEAT domains (Jankowsky and Harris, 2015)						x	x			x															x				x					x
DNA-dependent protein kinase catalytic subunit	PRKDC		interacts with ELAVL1 (Biogrid)	HEAT domains (Jankowsky and Harris, 2015), TPR domains, FAT domain, PI3K/PI4K domain, FATC domain	NHEJ complex, DNA-PK complex, HDP-RNP complex (Morchikh et al., 2017)	x		x															x								x		x	x
Proteasome subunit alpha type-6	PSMA6			Proteasome alpha-subunit, N-terminal domain	20S proteasome core	x			x															x	x				x				x
Proteasome subunit alpha type-7	PSMA7				20S proteasome core																								x				x
Proteasome subunit alpha type-7-like	PSMA8				20S proteasome core, spermatoproteasome																								x
Proteasome subunit beta type-2	PSMB2				20S proteasome core																								x
Proteasome subunit beta type-5	PSMB5				20S proteasome core																								x
Proteasome subunit beta type-6	PSMB6				20S proteasome core																								x
26S proteasome non-ATPase regulatory subunit 2	PSMD2			PC repeat domains	19S proteasome regulatory particle complex																							x	x									x
Pyrroline-5-carboxylate reductase 1, mitochondrial	PYCR1																																					x
Ras-related protein Rab-10	RAB10		interacts with ELAVL1 (Biogrid)					x																				x	x										x
Ras-related protein Rab-1A	RAB1A		Interacts with ELAVL1 (Biogrid)					x																				x	x				x					x
RNA-binding protein Raly	RALY			RRM domain (Jankowsky and Harris, 2015)	spliceosome C complex	x			x	x	x																x					x
Ran-specific GTPase-activating protein	RANBP1		interacts with ELAVL1 (Biogrid)	PH-like, RanBD1 domains																																		x
Regulator of chromosome condensation	RCC1			RCC1 repeat domains																													x					x
Protein RCC2	RCC2		interacts with ELAVL1 (Biogrid)	RCC1 repeat domains	N/A	x																	x					x										x
60S ribosomal protein L10	RPL10		Interacts with RPL11, YTHDF2 and RPS25 (Biogrid)		60S ribosomal subunit	x			x	x	x			x	x	x	x	x								x								x		x					x
60S ribosomal protein L10a	RPL10A		Interacts with RPL11 (STRING) and RPS25 (Biogrid)		60S ribosomal subunit	x			x	x	x			x	x		x	x				x			x	x			x					x		x					x
60S ribosomal protein L10-like	RPL10L		Interacts with RPL11 and RPS25 (Biogrid)		60S ribosomal subunit				x									x							x	x
60S ribosomal protein L11	RPL11	Interacts with the 3' UTR of c-myc mRNA (Challagundla et al., 2011)	Interacts with RPS25 (Biogrid)		5S RNP subcomplex, 60S ribosomal subunit	x			x	x	x			x	x		x	x				x	x		x	x			x					x		x					x
60S ribosomal protein L12	RPL12		Interacts with RPL11 (Biogrid)(STRING) and RPS25 (Biogrid)		60S ribosomal subunit	x	x		x		x			x	x		x	x					x			x			x					x		x
60S ribosomal protein L13	RPL13		Interacts with RPL11 and RPS25 (Biogrid)		60S ribosomal subunit	x			x	x	x			x			x	x					x			x							x	x		x
60S ribosomal protein L13a	RPL13A		Interacts with RPL11 (biogrid) (STRING) and RPS25 (Biogrid)		GAIT complex, 60S ribosomal subunit	x	x		x	x	x			x		x	x	x					x			x								x		x					x
Putative 60S ribosomal protein L13a protein RPL13AP3	RPL13AP3				60S ribosomal subunit	x	x									x		x								x
60S ribosomal protein L14	RPL14		Interacts with RPL11 and RPS25 (Biogrid)	l	60S ribosomal subunit	x			x	x	x			x	x		x	x				x				x			x					x		x					x
60S ribosomal protein L17	RPL17		Interacts with RPL11 (STRING) (Biogrid) and RPS25 (Biogrid)		60S ribosomal subunit	x			x	x	x			x			x	x								x								x		x					x
60S ribosomal protein L18	RPL18		Interacts with RPL11 and RPS25 (Biogrid)		60S ribosomal subunit	x			x	x	x			x			x	x					x		x	x								x		x
60S ribosomal protein L18a	RPL18A		Interacts with RPL11 (Biogrid)		60S ribosomal subunit	x			x	x	x			x			x	x							x	x								x		x					x
60S ribosomal protein L19	RPL19		Interacts with RPS25 (Biogrid)		60S ribosomal subunit	x	x		x	x	x			x			x	x							x	x										x					x
60S ribosomal protein L22	RPL22		Interacts with RPS25 (Biogrid)		60S ribosomal subunit	x			x	x	x			x	x		x	x				x				x			x	x				x		x					x
60S ribosomal protein L23	RPL23		Interacts with RPL11 (STRING) (Biogrid)		60S ribosomal subunit	x			x	x	x				x		x	x				x	x		x	x			x					x		x					x
60S ribosomal protein L23a	RPL23A		Interacts with RPL11 and RPS25 (Biogrid)		60S ribosomal subunit	x			x	x	x			x	x		x	x					x			x			x	x				x		x					x
60S ribosomal protein L24	RPL24		Interacts with RPL11 (Biogrid)		60S ribosomal subunit	x				x	x			x	x		x	x							x	x			x		x					x					x
60S ribosomal protein L26	RPL26		Interacts with RPS25 (Biogrid)	KOW domain (Jankowsky and Harris, 2015)	60S ribosomal subunit	x	x		x	x	x			x	x	x	x	x				x	x			x			x					x		x	x				x
60S ribosomal protein L26-like 1	RPL26L1		Interacts with RPL11 (Biogrid)	KOW domain (Jankowsky and Harris, 2015)	60S ribosomal subunit	x			x						x			x								x										x					x
60S ribosomal protein L27	RPL27		Interacts with RPL11 and RPS25 (Biogrid)	KOW domain (Jankowsky and Harris, 2015)	60S ribosomal subunit	x			x	x	x			x	x		x	x				x				x			x		x			x		x					x
60S ribosomal protein L29	RPL29		Interacts with RPS25 (Biogrid)		60S ribosomal subunit	x			x	x	x			x	x		x	x				x				x										x					x
60S ribosomal protein L3	RPL3		Interacts with RPL11 (Biogrid)(STRING) and RPS25 (Biogrid)		60S ribosomal subunit	x			x	x	x			x	x		x	x					x			x			x					x		x
60S ribosomal protein L31	RPL31		Interacts with RPL11 (Biogrid)		60S ribosomal subunit	x			x	x	x			x	x		x	x				x			x	x			x	x				x		x					x
60S ribosomal protein L34	RPL34		Interacts with RPS25 (Biogrid)		60S ribosomal subunit	x			x	x	x			x			x	x								x			x							x					x
60S ribosomal protein L35	RPL35		Interacts with RPL11 (Biogrid) (STRING) and RPS25 (Biogrid)		60S ribosomal subunit	x	x		x	x	x			x	x		x	x				x	x			x								x		x					x
60S ribosomal protein L35a	RPL35A		Interacts with RPL11 and RPS25 (Biogrid)		60S ribosomal subunit	x			x	x	x			x			x	x				x				x			x					x		x					x
60S ribosomal protein L8	RPL8		Interacts with RPL11 and RPS25 (Biogrid)	Ribosomal Proteins L2, RNA binding domain (InterPro)	60S ribosomal subunit	x			x	x	x			x			x	x							x	x					x			x		x					x
60S ribosomal protein L9	RPL9		Interacts with RPL11 (Biogrid)(STRING) and RPS25 (biogrid)		60S ribosomal subunit	x			x	x	x			x			x	x								x					x			x		x					x
60S acidic ribosomal protein P0	RPLP0		Interacts with RPL11 and RPS25 (Biogrid)		IGF2BP1-dependent mRNP granule complex containing untranslated mRNAs; 60S ribosomal subunit	x			x	x	x			x	x		x	x						x		x			x					x		x
60S acidic ribosomal protein P0-like	RPLP0P6		Interacts with RPL11 and RPS25 (Biogrid)		60S ribosomal subunit	x			x						x			x								x
Dolichyl-diphosphooligosaccharide--protein glycosyltransferase subunit 2	RPN2				OST complex
40S ribosomal protein S15a	RPS15A		Interacts with RPL11 and RPS25 (biogrid)		40S ribosomal subunit	x			x	x	x			x			x	x								x			x	x				x	x	x				x	x
40S ribosomal protein S18	RPS18		Interacts with RPL11 and RPS25 (Biogrid)		40S ribosomal subunit	x			x	x	x			x			x	x								x			x	x				x	x	x
40S ribosomal protein S19	RPS19		interacts with RPS25 (Biogrid)(STRING) and with RPL11 (Biogrid)		40S ribosomal subunit	x			x	x	x			x	x		x	x				x	x			x			x	x					x	x
40S ribosomal protein S2	RPS2		Interacts with RPS25 (Biogrid)	Ribosomal protein S5 domain 2-type fold; found in numerous RNA binding proteins (InterPro)	40S ribosomal subunit	x	x		x	x	x			x	x		x	x				x				x			x						x	x
40S ribosomal protein S20	RPS20		Interacts with RPL11 and RPS25 (biogrid)		40S ribosomal subunit	x			x	x	x			x	x		x	x				x				x			x						x	x
40S ribosomal protein S23	RPS23		Interacts with RPL11 and RPS25 (biogrid)		40S ribosomal subunit	x			x	x	x			x			x	x								x									x					x
40S ribosomal protein S24	RPS24		interacts with RPS25 (Biogrid) (STRING) and with RPL11 (biogrid)		40S ribosomal subunit	x			x	x				x	x		x	x				x				x					x				x					x
40S ribosomal protein S25	RPS25	Interacts with c-Myc IRES (Shi et al., 2015)	Interacts with RPL11 (biogrid)		40S ribosomal subunit	x			x	x	x			x			x	x					x			x			x	x					x	x
40S ribosomal protein S27	RPS27		interacts with RPS25 (Biogrid) (STRING) and with RPL11 (biogrid)		40S ribosomal subunit	x			x	x	x			x	x		x	x				x				x									x	x				x	x
40S ribosomal protein S4, X isoform	RPS4X		interacts with RPS25 (Biogrid)(STRING) and with RPL11 (biogrid)	RNA-binding S4 domain could bind RNA molecules (InterPRO)	IGF2BP1-dependent mRNP granule complex containing untranslated mRNAs; 40S ribosomal subunit	x			x	x	x			x		x	x	x						x	x	x			x					x	x	x	x			x	x
40S ribosomal protein S6	RPS6		Interacts with RPL11 and RPS25(biogrid)		40S ribosomal subunit	x			x	x	x			x	x		x	x				x	x	x	x	x							x	x	x	x			x
40S ribosomal protein S9	RPS9		Interacts with RPL11 and RPS25 (biogrid)	RNA-binding S4 domain could bind RNA molecules (InterPRO)	IGF2BP1-dependent mRNP granule complex containing untranslated mRNAs; 40S ribosomal subunit	x			x	x	x			x	x	x	x	x				x	x			x			x	x				x	x	x
Ribosome-binding protein 1	RRBP1		Interacts with RPL11 and with RPS25 (biogrid)			x			x									x								x
Ribosomal L1 domain-containing protein 1	RSL1D1					x	x		x	x					x							x	x											x				x
RuvB-like 1	RUVBL1		Interacts with ELAVL1 (Biogrid)	myc domain	interacts with the transcriptional activation domain of MYC; RNA polymerase II holoenzyme complex; NuA4 histone acetyltransferase complex (interacts with MYC); BAF53 complex; MLL1/MLL complex; chromatin-remodeling INO80 complex; SWR1-like complex; R2TP complex			x	x																				x				x
Protein S100-A8;Protein S100-A8, N-terminally processed	S100A8			EF-hand domains	N/A																								x								x
Protein S100-A9	S100A9			EF-hand domains	N/A																							x	x								x	x
Suprabasin	SBSN																												x								x
Succinate dehydrogenase [ubiquinone] flavoprotein subunit, mitochondrial	SDHA		Interacts with ELAVL1 (Biogrid)		complex II (FP-SDHA, IP-SDHB, CYPb560)							x											x
Protein transport protein Sec24C	SEC24C			zinc finger domain (Jankowsky and Harris, 2015)	COPII complex																							x										x
Serpin B12	SERPINB12																											x	x								x
Serpin B3	SERPINB3																											x	x								x
Serpin H1	SERPINH1		Interacts with ELAVL1 (Biogrid)	Serpin domain		x																							x
Splicing factor 3B subunit 2	SF3B2			SAP domain (Castello et al., 2012)	Spliceosome C complex, U11/U12 snRNPs, SF3B complex --> U2 snRNP cmplex	x			x	x	x																x			x		x
Sideroflexin-1	SFXN1		Interacts with ELAVL1 (Biogrid)
Serine hydroxymethyltransferase, mitochondrial	SHMT2				BRISC complex											x													x
Tricarboxylate transport protein, mitochondrial	SLC25A1			solcar repeat domains																									x
Staphylococcal nuclease domain-containing protein 1	SND1			Tnase-like domains, Tudor domain (Ponting, 1997)	N/A	x			x	x			x															x	x									x
Small nuclear ribonucleoprotein-associated proteins B and B	SNRPB			LSM domains (Jankowsky and Harris, 2015)	U1 snRNP, U11/U12 snRNPs, U7 snRNP complex (U7 Sm protein core complex), SMN-Sm complex, 6S pICln-Sm complex	x			x	x	x																x		x	x		x
Small nuclear ribonucleoprotein Sm D3	SNRPD3		interacts with ELAVL1 (Biogrid)	LSM domains (Jankowsky and Harris, 2015)	U1 snRNP, U11/U12 snRNPs, U7 snRNP complex (U7 Sm protein core complex), SMN-Sm complex, 6S pICln-Sm complex	x			x	x	x																x		x	x		x		x
Small nuclear ribonucleoprotein-associated protein N	SNRPN			LSM domains (Jankowsky and Harris, 2015)	N/A	x			x	x	x																x			x
Signal recognition particle 14 kDa protein	SRP14				signal recognition particle	x			x																			x	x					x
Serine/arginine-rich splicing factor 1	SRSF1		interacts with ELAVL1 (Biogrid)	RRM domains (Jankowsky and Harris, 2015)	spliceosome C complex	x	x		x	x	x																x		x	x	x	x		x				x
Serine/arginine-rich splicing factor 2	SRSF2			RRM domain (Jankowsky and Harris, 2015)	N/A	x				x	x																		x	x		x		x
Signal transducer and activator of transcription 5A	STAT5A			SH2 domain
Signal transducer and activator of transcription 5B	STAT5B			SH2 domain
Stress-induced-phosphoprotein 1	STIP1		interacts with ELAVL1 (Biogrid)	TPR domains; STI1 domain		x																																x
Stomatin-like protein 2, mitochondrial	STOML2		interacts with ELAVL1 (Biogrid)									x
Transaldolase	TALDO1																												x
Threonine--tRNA ligase, cytoplasmic	TARS			tRNA synthetase domains (Jankowsky and Harris, 2015)		x		x		x			x					x	x										x
Treacle protein	TCOF1			LisH domain	large pre-ribosomal nucleoprotein complex	x										x							x											x
T-complex protein 1 subunit alpha	TCP1				BBS/CCT complex	x		x												x	x							x	x									x
Transferrin receptor protein 1;Transferrin receptor protein 1, serum form	TFRC			PA domain		x																						x	x										x
Talin-1	TLN1			FERM domain, I/LWEQ domain																									x
Transmembrane protein 263	TMEM263		interacts with ELAVL1 (Biogrid)		N/A
Transmembrane protein 33	TMEM33																											x	x
DNA topoisomerase 1	TOP1		interacts with ELAVL1 (Biogrid)	DNA topoisomerase I, DNA binding, N-terminal domain 1 and 2	N/A	x		x	x														x	x										x
Heat shock protein 75 kDa, mitochondrial	TRAP1			Ribosomal protein S5 domain 2-type fold domains are found in nomerous RNA binding proteins (interPRO analysis) HSP90, C-terminal domain		x		x				x				x				x								x
Tubulin beta-4B chain	TUBB4B			Tubulin/FtsZ, GTPase domain, Tubulin/FtsZ, 2-layer sandwich domain		x		x																				x	x
Thioredoxin	TXN			thioredoxin domain	N/A	x																							x									x
Ubiquitin-conjugating enzyme E2 N	UBE2N		interacts with ELAVL1 (Biogrid)			x		x															x						x
Putative ubiquitin-conjugating enzyme E2 N-like	UBE2NL		interacts with ELAVL1 (Biogrid)																										x
Vesicle-associated membrane protein-associated protein A	VAPA			MSP domain																								x											x
Valine--tRNA ligase	VARS			tRNA synthetase domains (Jankowsky and Harris, 2015); GST C-terminal domain; HIGH region motif; KMSKS region motif				x		x			x					x	x
Vinculin	VCL																											x	x
Transitional endoplasmic reticulum ATPase	VCP		Interacts with RPS25 and ELAVL1 (Biogrid)	PIM motif, CDC48 domain 2, ATPase domain	VCP/p97-AMFR/gp78 complex	x		x	x			x								x				x				x	x									x	x
Voltage-dependent anion-selective channel protein 1	VDAC1				HK1-VDAC1 complex; mPTPC complex																								x
Tyrosine--tRNA ligase, cytoplasmic;Tyrosine--tRNA ligase, cytoplasmic, N-terminally processed	YARS			tRNA- synthetase domains (Jankowsky and Harris, 2015); HIGH region motif; KMSKS region motif		x		x		x			x					x	x
YTH domain-containing family protein 2	YTHDF2	(Su et al., 2017)	interacts with ELAVL1 (Biogrid)	YTH domain (Zhang et al., 2010)	N/A	x			x							x								x														x
14-3-3 protein gamma;14-3-3 protein gamma, N-terminally processed	YWHAG		interacts with ELAVL1 (Biogrid)	14-3-3 domain		x																							x
