# Supplementary material for: Comprehensive in vivo identification of the c-Myc mRNA protein interactome using HyPR-MS
Source: RNA. 2019 Oct;25(10):1337–52. doi: 10.1261/rna.072157.119 (PMC6800478; doi:10.1261/rna.072157.119)
Supplement: Supplemental Material [file supp_072157.119_Supplemental_Table_S4.xlsx]

## Sheet: ELAVL1 interactors in myc list 
Interactors of ELAVL1 present in myc list by BioGRID and STRING analysis
ACTN4
CANX
CAPZA1
DDX17
DDX18
EIF2S3
GDI2
H2AFV
HMGB2
IDH1
IGF2BP1
KPNB1
LUC7L2
NCCRP1
PABPC1
PPP2R1A
PRKDC
RAB10
RAB1A
RANBP1
RCC2
RUVBL1
SDHA
SERPINH1
SFXN1
SNRPD3
SRSF1
STIP1
STOML2
TMEM263
TOP1
UBE2N
UBE2NL
VCP
YTHDF2
YWHAG

## Sheet: key
Table S5: Gene Ontology Term Enrichment Analysis for ELAVL1 interactors present in c-Myc mRNA protein interactome.
Gene Ontology Table Key:
GO biological process complete = GO analysis was run on terms related to biological process. The listed terms are accompanied by their GO reference number.
GO cellular component complete = GO analysis was run on terms related to cellular component. The listed terms are accompanied by their GO reference number.
GO molecular function complete = GO analysis was run on terms related to molecular function. The listed terms are accompanied by their GO reference number.
Homo sapiens - REFLIST (21002) = the total number of genes present in the GO database that are associated with the listed term
ELAVL1 interactors present in c-Myc RBPs list enriched = the observed number of proteins within the input list that are associated with the listed term
ELAVL1 interactors present in c-Myc RBPs list enriched (expected) = the expected number of proteins that would be present in the input list if its combination of proteins was completely random
ELAVL1 interactors present in c-Myc RBPs list enriched (over/under) = a binary measure of whether the observed enrichment in the input list is higher (+) or lower (-) than the expected enrichment
ELAVL1 c-Myc RBPs list enriched (fold Enrichment) = the degree to which enrichment was observed; a fold enrichment higher than 1 indicates a higher-than-expected enrichment, while a fold enrichment lower than 1 indicates a lower-than-expected enrichment
ELAVL1 interactors present in c-Myc RBPs list enriched (P-value) = the likelihood that the observed fold enrichment occurred due to random chance; in this case, a p-value less than 0.05 was considered significant and that the corresponding term was not enriched by chance

## Sheet: Cellular components
Analysis Type:	PANTHER Overrepresentation Test (Released 20181113)
Annotation Version and Release Date:	GO Ontology database Released 2018-12-01
Analyzed List:	upload_1 (Homo sapiens)
Reference List:	Homo sapiens (all genes in database)
Test Type:	FISHER
Correction:	BONFERRONI
Bonferroni count:	1421
GO cellular component complete	Homo sapiens - REFLIST (20996)	upload_1 (36)	upload_1 (expected)	upload_1 (over/under)	upload_1 (fold Enrichment)	upload_1 (P-value)
cytoplasmic stress granule (GO:0010494)	60	4	0.1	+	38.88	0.00607
myelin sheath (GO:0043209)	167	6	0.29	+	20.95	0.00064
cytoplasmic ribonucleoprotein granule (GO:0036464)	207	6	0.35	+	16.9	0.00216
ribonucleoprotein granule (GO:0035770)	219	6	0.38	+	15.98	0.00297
ribonucleoprotein complex (GO:1990904)	866	12	1.48	+	8.08	1.83e-05
extracellular exosome (GO:0070062)	2095	18	3.59	+	5.01	2.21e-06
extracellular vesicle (GO:1903561)	2116	18	3.63	+	4.96	2.6e-06
extracellular organelle (GO:0043230)	2118	18	3.63	+	4.96	2.63e-06
extracellular space (GO:0005615)	3334	20	5.72	+	3.5	8.21e-05
extracellular region part (GO:0044421)	3528	20	6.05	+	3.31	0.000215
vesicle (GO:0031982)	3803	19	6.52	+	2.91	0.00411
intracellular non-membrane-bounded organelle (GO:0043232)	4227	21	7.25	+	2.9	0.00081
non-membrane-bounded organelle (GO:0043228)	4235	21	7.26	+	2.89	0.000838
extracellular region (GO:0005576)	4342	20	7.44	+	2.69	0.00664
protein-containing complex (GO:0032991)	5388	24	9.24	+	2.6	0.000414
nuclear part (GO:0044428)	4491	20	7.7	+	2.6	0.0114
cytosol (GO:0005829)	5094	22	8.73	+	2.52	0.0041
organelle lumen (GO:0043233)	5246	22	8.99	+	2.45	0.0069
intracellular organelle lumen (GO:0070013)	5246	22	8.99	+	2.45	0.0069
membrane-enclosed lumen (GO:0031974)	5246	22	8.99	+	2.45	0.0069
intracellular organelle part (GO:0044446)	9273	30	15.9	+	1.89	0.0027
organelle part (GO:0044422)	9574	30	16.42	+	1.83	0.007
cytoplasmic part (GO:0044444)	9709	29	16.65	+	1.74	0.0474
intracellular membrane-bounded organelle (GO:0043231)	10981	32	18.83	+	1.7	0.00746
membrane-bounded organelle (GO:0043227)	12489	35	21.41	+	1.63	0.000503
organelle (GO:0043226)	13591	35	23.3	+	1.5	0.00654

## Sheet: Molecular function
Analysis Type:	PANTHER Overrepresentation Test (Released 20181113)
Annotation Version and Release Date:	GO Ontology database Released 2018-12-01
Analyzed List:	upload_1 (Homo sapiens)
Reference List:	Homo sapiens (all genes in database)
Test Type:	FISHER
Correction:	BONFERRONI
Bonferroni count:	2782
GO molecular function complete	Homo sapiens - REFLIST (20996)	upload_1 (36)	upload_1 (expected)	upload_1 (over/under)	upload_1 (fold Enrichment)	upload_1 (P-value)
cadherin binding (GO:0045296)	314	7	0.54	+	13	0.00287
cell adhesion molecule binding (GO:0050839)	482	8	0.83	+	9.68	0.00389
RNA binding (GO:0003723)	1661	22	2.85	+	7.72	2.3e-12
nucleic acid binding (GO:0003676)	4125	23	7.07	+	3.25	2.49e-05
heterocyclic compound binding (GO:1901363)	6058	28	10.39	+	2.7	4.95e-06
organic cyclic compound binding (GO:0097159)	6144	28	10.53	+	2.66	7.03e-06
Unclassified (UNCLASSIFIED)	3306	2	5.67	-	0.35	0

## Sheet: Biological processes
Analysis Type:	PANTHER Overrepresentation Test (Released 20181113)
Annotation Version and Release Date:	GO Ontology database Released 2018-12-01
Analyzed List:	upload_1 (Homo sapiens)
Reference List:	Homo sapiens (all genes in database)
Test Type:	FISHER
Correction:	BONFERRONI
Bonferroni count:	8723
GO biological process complete	Homo sapiens - REFLIST (20996)	upload_1 (36)	upload_1 (expected)	upload_1 (over/under)	upload_1 (fold Enrichment)	upload_1 (P-value)
ribonucleoprotein complex subunit organization (GO:0071826)	241	6	0.41	+	14.52	0.0312
establishment of localization in cell (GO:0051649)	1789	13	3.07	+	4.24	0.0395
cellular localization (GO:0051641)	2388	15	4.09	+	3.66	0.0328
cellular component assembly (GO:0022607)	2454	15	4.21	+	3.56	0.046
cellular component biogenesis (GO:0044085)	2678	16	4.59	+	3.48	0.0253
nucleobase-containing compound metabolic process (GO:0006139)	2949	17	5.06	+	3.36	0.0169
heterocycle metabolic process (GO:0046483)	3116	17	5.34	+	3.18	0.0365
cellular aromatic compound metabolic process (GO:0006725)	3163	17	5.42	+	3.13	0.0449
cellular component organization or biogenesis (GO:0071840)	5714	25	9.8	+	2.55	0.00144
cellular component organization (GO:0016043)	5531	24	9.48	+	2.53	0.00429
Unclassified (UNCLASSIFIED)	3250	1	5.57	-	0.18	0
