# Supplementary material for: Comprehensive in vivo identification of the c-Myc mRNA protein interactome using HyPR-MS
Source: RNA. 2019 Oct;25(10):1337–52. doi: 10.1261/rna.072157.119 (PMC6800478; doi:10.1261/rna.072157.119)
Supplement: Supplemental Material [file supp_072157.119_Supplemental_Table_S5.xlsx]

## Sheet: Foglio1
			CONFIRMATION GROUPS				VALIDATION GROUPS
			Protein belonging in at least one enriched GO term group related with known aspects of mRNA biology or of the nascent protein *	Proteins with structural characteristics proper of RBPs and/or of mRNPs components **	Defined interactors of known c-Myc mRNA bounders ***	Protein known to be linked with metabolism of c-Myc transcript and of the nascent protein****	Previous defined c-Myc mRNA interactors #	Previous defined potential interactors by previous in vitro methods ##	Predicted c-Myc mRNA interactors ###	c-Myc mRNA interactors by previous RIP and CLIP seq data ####	RIP-qPCR performed for the validation #####
Number of HyPR-MS c-Myc RBPs belonging in the correspondent confirmation or validation group			209/229 (91.2%)	154/229 (67.2%)	91/229 (39.7%)	14/229(6.1%)
Protein IDs	Protein names	Gene names
P49588	Alanine--tRNA ligase, cytoplasmic	AARS	x	x						x
P24752	Acetyl-CoA acetyltransferase, mitochondrial	ACAT1	x	x
P53396	ATP-citrate synthase	ACLY	x	x
Q99798	Aconitate hydratase, mitochondrial	ACO2			x
O43707	Alpha-actinin-4	ACTN4	x	x	x
P23526	Adenosylhomocysteinase	AHCY	x
Q09666	Neuroblast differentiation-associated protein AHNAK	AHNAK	x	x
P54819	Adenylate kinase 2, mitochondrial;Adenylate kinase 2, mitochondrial, N-terminally processed	AK2	x	x
O75342	Arachidonate 12-lipoxygenase, 12R-type	ALOX12B
P63010	AP-2 complex subunit beta	AP2B1	x			x
P05089	Arginase-1	ARG1	x
P31939	Bifunctional purine biosynthesis protein PURH;Phosphoribosylaminoimidazolecarboxamide formyltransferase;IMP cyclohydrolase	ATIC	x
P25311	Zinc-alpha-2-glycoprotein	AZGP1	x
P30043	Flavin reductase (NADPH)	BLVRB	x
Q8TDN6	Ribosome biogenesis protein BRX1 homolog	BRIX1	x	x	x
P27824	Calnexin	CANX	x	x	x
P52907	F-actin-capping protein subunit alpha-1	CAPZA1	x		x
P78371	T-complex protein 1 subunit beta	CCT2	x	x
P49368	T-complex protein 1 subunit gamma	CCT3	x	x
P50991	T-complex protein 1 subunit delta	CCT4	x	x
P48643	T-complex protein 1 subunit epsilon	CCT5	x	x
P40227	T-complex protein 1 subunit zeta	CCT6A	x	x
Q99832	T-complex protein 1 subunit eta	CCT7	x	x
Q16543	Hsp90 co-chaperone Cdc37;Hsp90 co-chaperone Cdc37, N-terminally processed	CDC37	x
Q00610	Clathrin heavy chain 1	CLTC	x	x
P13073	Cytochrome c oxidase subunit 4 isoform 1, mitochondrial	COX4I1	x
Q08257	Quinone oxidoreductase	CRYZ	x	x
O75390	Citrate synthase, mitochondrial	CS	x	x
P07339	Cathepsin D;Cathepsin D light chain;Cathepsin D heavy chain	CTSD	x
P99999	Cytochrome c	CYCS	x
P14868	Aspartate--tRNA ligase, cytoplasmic	DARS	x	x
P39656	Dolichyl-diphosphooligosaccharide--protein glycosyltransferase 48 kDa subunit	DDOST	x
Q92499	ATP-dependent RNA helicase DDX1	DDX1	x	x				x
Q92841	Probable ATP-dependent RNA helicase DDX17	DDX17	x	x	x
Q9NVP1	ATP-dependent RNA helicase DDX18	DDX18	x	x	x
O43143	Pre-mRNA-splicing factor ATP-dependent RNA helicase DHX15	DHX15	x	x
Q99848	Probable rRNA-processing protein EBP2	EBNA1BP2	x	x	x
P29692	Elongation factor 1-delta	EEF1D	x	x
P26641	Elongation factor 1-gamma	EEF1G	x	x
P41091	Eukaryotic translation initiation factor 2 subunit 3	EIF2S3	x	x	x			x
Q2VIR3	Putative eukaryotic translation initiation factor 2 subunit 3-like protein	EIF2S3L	x	x
O60841	Eukaryotic translation initiation factor 5B	EIF5B	x	x
P56537	Eukaryotic translation initiation factor 6	EIF6	x	x
Q15717	ELAV-like protein 1	ELAVL1	x	x	x	x	x	x	x
P50402	Emerin	EMD
P07814	Bifunctional glutamate/proline--tRNA ligase;Glutamate--tRNA ligase;Proline--tRNA ligase	EPRS	x	x
Q9BSJ8	Extended synaptotagmin-1	ESYT1
P13804	Electron transfer flavoprotein subunit alpha, mitochondrial	ETFA
P38117	Electron transfer flavoprotein subunit beta	ETFB	x
Q9NSD9	Phenylalanine--tRNA ligase beta subunit	FARSB	x	x
P49327	Fatty acid synthase;[Acyl-carrier-protein] S-acetyltransferase;[Acyl-carrier-protein] S-malonyltransferase;3-oxoacyl-[acyl-carrier-protein] synthase;3-oxoacyl-[acyl-carrier-protein] reductase;3-hydroxyacyl-[acyl-carrier-protein] dehydratase;Enoyl-[acyl-carrier-protein] reductase;Oleoyl-[acyl-carrier-protein] hydrolase	FASN	x	x
P22087	rRNA 2-O-methyltransferase fibrillarin	FBL	x	x	x
Q86UX7	Fermitin family homolog 3	FERMT3	x
Q02790	Peptidyl-prolyl cis-trans isomerase FKBP4;Peptidyl-prolyl cis-trans isomerase FKBP4, N-terminally processed	FKBP4	x	x
P21333	Filamin-A	FLNA	x	x
Q14315	Filamin-C	FLNC
Q14697	Neutral alpha-glucosidase AB	GANAB	x	x
P41250	Glycine--tRNA ligase	GARS	x	x
P50395	Rab GDP dissociation inhibitor beta	GDI2	x	x	x
Q96QA5	Gasdermin-A	GSDMA
Q92522	Histone H1x	H1FX	x	x							x
Q71UI9	Histone H2A.V	H2AFV	x		x
P0C0S5	Histone H2A.Z	H2AFZ	x			x
Q9P035	Very-long-chain (3R)-3-hydroxyacyl-CoA dehydratase 3	HACD3
P40939	Trifunctional enzyme subunit alpha, mitochondrial;Long-chain enoyl-CoA hydratase;Long chain 3-hydroxyacyl-CoA dehydrogenase	HADHA	x	x
P69905	Hemoglobin subunit alpha	HBA1	x	x
P69891	Hemoglobin subunit gamma-1	HBG1	x	x
P16403	Histone H1.2	HIST1H1C	x	x
P16402	Histone H1.3	HIST1H1D	x	x
P10412	Histone H1.4	HIST1H1E	x	x
P33778	Histone H2B type 1-B	HIST1H2BB	x
P06899	Histone H2B type 1-J	HIST1H2BJ	x
P23527	Histone H2B type 1-O	HIST1H2BO	x
Q16778	Histone H2B type 2-E	HIST2H2BE	x
P26583	High mobility group protein B2	HMGB2	x	x	x
Q01581	Hydroxymethylglutaryl-CoA synthase, cytoplasmic	HMGCS1	x
P05204	Non-histone chromosomal protein HMG-17	HMGN2	x	x
Q99729	Heterogeneous nuclear ribonucleoprotein A/B	HNRNPAB	x	x
O43390	Heterogeneous nuclear ribonucleoprotein R	HNRNPR	x	x
Q58FF8	Putative heat shock protein HSP 90-beta 2	HSP90AB2P	x	x
P14625	Endoplasmin	HSP90B1	x	x
P34932	Heat shock 70 kDa protein 4	HSPA4	x	x
P61604	10 kDa heat shock protein, mitochondrial	HSPE1	x	x
Q92598	Heat shock protein 105 kDa	HSPH1	x	x		x
O75874	Isocitrate dehydrogenase [NADP] cytoplasmic	IDH1	x		x
Q9NZI8	Insulin-like growth factor 2 mRNA-binding protein 1	IGF2BP1	x	x	x	x	x			x
P01876	Ig alpha-1 chain C region	IGHA1	x
Q16891	MICOS complex subunit MIC60	IMMT	x	x
P12268	Inosine-5-monophosphate dehydrogenase 2	IMPDH2	x	x
P52292	Importin subunit alpha-1	KPNA2	x	x
Q14974	Importin subunit beta-1	KPNB1	x	x	x
Q14739	Lamin-B receptor	LBR	x	x
P47929	Galectin-7	LGALS7	x
P36776	Lon protease homolog, mitochondrial	LONP1	x	x
Q96AG4	Leucine-rich repeat-containing protein 59	LRRC59
Q9Y383	Putative RNA-binding protein Luc7-like 2	LUC7L2	x	x	x
Q96N66	Lysophospholipid acyltransferase 7	MBOAT7
P49736	DNA replication licensing factor MCM2	MCM2	x	x	x
P25205	DNA replication licensing factor MCM3	MCM3	x	x		x
Q14566	DNA replication licensing factor MCM6	MCM6	x	x
P33993	DNA replication licensing factor MCM7	MCM7	x	x
P40925	Malate dehydrogenase, cytoplasmic	MDH1	x
P40926	Malate dehydrogenase, mitochondrial	MDH2	x	x
Q9BQG0	Myb-binding protein 1A	MYBBP1A	x	x	x						x
Q6ZVX7	F-box only protein 50	NCCRP1	x		x
Q14978	Nucleolar and coiled-body phosphoprotein 1	NOLC1	x	x	x					x
P46087	Probable 28S rRNA (cytosine(4447)-C(5))-methyltransferase	NOP2	x	x	x
O00567	Nucleolar protein 56	NOP56	x	x	x
Q9Y2X3	Nucleolar protein 58	NOP58	x	x	x
Q9Y266	Nuclear migration protein nudC	NUDC	x
P04181	Ornithine aminotransferase, mitochondrial;Ornithine aminotransferase, hepatic form;Ornithine aminotransferase, renal form	OAT
Q9NTK5	Obg-like ATPase 1	OLA1	x	x
P07237	Protein disulfide-isomerase	P4HB	x	x
Q9UQ80	Proliferation-associated protein 2G4	PA2G4	x	x	x
P11940	Polyadenylate-binding protein 1	PABPC1	x	x	x			x	x
P22234	Multifunctional protein ADE2;Phosphoribosylaminoimidazole-succinocarboxamide synthase;Phosphoribosylaminoimidazole carboxylase	PAICS	x	x
P30101	Protein disulfide-isomerase A3	PDIA3	x	x
Q15084	Protein disulfide-isomerase A6	PDIA6	x			x
P18669	Phosphoglycerate mutase 1	PGAM1	x
P35232	Prohibitin	PHB	x
Q99623	Prohibitin-2	PHB2
Q13492	Phosphatidylinositol-binding clathrin assembly protein	PICALM	x
P30153	Serine/threonine-protein phosphatase 2A 65 kDa regulatory subunit A alpha isoform	PPP2R1A	x		x
P78527	DNA-dependent protein kinase catalytic subunit	PRKDC	x	x	x	x
P60900	Proteasome subunit alpha type-6	PSMA6	x	x
O14818	Proteasome subunit alpha type-7	PSMA7	x
Q8TAA3	Proteasome subunit alpha type-7-like	PSMA8	x
P49721	Proteasome subunit beta type-2	PSMB2	x
P28074	Proteasome subunit beta type-5	PSMB5	x
P28072	Proteasome subunit beta type-6	PSMB6	x
Q13200	26S proteasome non-ATPase regulatory subunit 2	PSMD2	x
P32322	Pyrroline-5-carboxylate reductase 1, mitochondrial	PYCR1
P61026	Ras-related protein Rab-10	RAB10	x	x	x
P62820	Ras-related protein Rab-1A	RAB1A	x	x	x
Q9UKM9	RNA-binding protein Raly	RALY	x	x					x
P43487	Ran-specific GTPase-activating protein	RANBP1			x
P18754	Regulator of chromosome condensation	RCC1
Q9P258	Protein RCC2	RCC2	x	x	x
P27635	60S ribosomal protein L10	RPL10	x	x	x
P62906	60S ribosomal protein L10a	RPL10A	x	x	x
Q96L21	60S ribosomal protein L10-like	RPL10L	x	x	x
P62913	60S ribosomal protein L11	RPL11	x	x	x	x	x
P30050	60S ribosomal protein L12	RPL12	x	x	x			x
P26373	60S ribosomal protein L13	RPL13	x	x	x			x
P40429	60S ribosomal protein L13a	RPL13A	x	x	x
Q6NVV1	Putative 60S ribosomal protein L13a protein RPL13AP3	RPL13AP3	x	x	x
P50914	60S ribosomal protein L14	RPL14	x	x	x
P18621	60S ribosomal protein L17	RPL17	x	x	x
Q07020	60S ribosomal protein L18	RPL18	x	x	x			x
Q02543	60S ribosomal protein L18a	RPL18A	x	x	x
P84098	60S ribosomal protein L19	RPL19	x	x	x
P35268	60S ribosomal protein L22	RPL22	x	x	x
P62829	60S ribosomal protein L23	RPL23	x	x	x
P62750	60S ribosomal protein L23a	RPL23A	x	x	x
P83731	60S ribosomal protein L24	RPL24	x	x	x
P61254	60S ribosomal protein L26	RPL26	x	x	x
Q9UNX3	60S ribosomal protein L26-like 1	RPL26L1	x	x	x
P61353	60S ribosomal protein L27	RPL27	x	x	x
P47914	60S ribosomal protein L29	RPL29	x	x	x
P39023	60S ribosomal protein L3	RPL3	x	x	x			x
P62899	60S ribosomal protein L31	RPL31	x	x	x
P49207	60S ribosomal protein L34	RPL34	x	x	x
P42766	60S ribosomal protein L35	RPL35	x	x	x
P18077	60S ribosomal protein L35a	RPL35A	x	x	x
P62917	60S ribosomal protein L8	RPL8	x	x	x
P32969	60S ribosomal protein L9	RPL9	x	x	x
P05388	60S acidic ribosomal protein P0	RPLP0	x	x	x			x
Q8NHW5	60S acidic ribosomal protein P0-like	RPLP0P6	x	x	x
P04844	Dolichyl-diphosphooligosaccharide--protein glycosyltransferase subunit 2	RPN2
P62244	40S ribosomal protein S15a	RPS15A	x	x	x
P62269	40S ribosomal protein S18	RPS18	x	x	x			x
P39019	40S ribosomal protein S19	RPS19	x	x	x			x
P15880	40S ribosomal protein S2	RPS2	x	x	x			x
P60866	40S ribosomal protein S20	RPS20	x	x	x			x
P62266	40S ribosomal protein S23	RPS23	x	x	x
P62847	40S ribosomal protein S24	RPS24	x	x	x
P62851	40S ribosomal protein S25	RPS25	x	x	x	x	x
P42677	40S ribosomal protein S27	RPS27	x	x	x
P62701	40S ribosomal protein S4, X isoform	RPS4X	x	x	x
P62753	40S ribosomal protein S6	RPS6	x	x	x			x
P46781	40S ribosomal protein S9	RPS9	x	x	x			x
Q9P2E9	Ribosome-binding protein 1	RRBP1	x	x	x
O76021	Ribosomal L1 domain-containing protein 1	RSL1D1	x	x
Q9Y265	RuvB-like 1	RUVBL1	x	x	x
P05109	Protein S100-A8;Protein S100-A8, N-terminally processed	S100A8	x
P06702	Protein S100-A9	S100A9	x
Q6UWP8	Suprabasin	SBSN	x
P31040	Succinate dehydrogenase [ubiquinone] flavoprotein subunit, mitochondrial	SDHA	x		x
P53992	Protein transport protein Sec24C	SEC24C	x
Q96P63	Serpin B12	SERPINB12	x
P29508	Serpin B3	SERPINB3	x
P50454	Serpin H1	SERPINH1	x	x	x
Q13435	Splicing factor 3B subunit 2	SF3B2	x	x
Q9H9B4	Sideroflexin-1	SFXN1			x
P34897	Serine hydroxymethyltransferase, mitochondrial	SHMT2	x
P53007	Tricarboxylate transport protein, mitochondrial	SLC25A1	x
Q7KZF4	Staphylococcal nuclease domain-containing protein 1	SND1	x	x						x
P14678	Small nuclear ribonucleoprotein-associated proteins B and B	SNRPB	x	x
P62318	Small nuclear ribonucleoprotein Sm D3	SNRPD3	x	x	x
P63162	Small nuclear ribonucleoprotein-associated protein N	SNRPN	x	x
P37108	Signal recognition particle 14 kDa protein	SRP14	x	x
Q07955	Serine/arginine-rich splicing factor 1	SRSF1	x	x	x				x	x
Q01130	Serine/arginine-rich splicing factor 2	SRSF2	x	x					x
P42229	Signal transducer and activator of transcription 5A	STAT5A				x
P51692	Signal transducer and activator of transcription 5B	STAT5B
P31948	Stress-induced-phosphoprotein 1	STIP1	x	x	x
Q9UJZ1	Stomatin-like protein 2, mitochondrial	STOML2	x		x
P37837	Transaldolase	TALDO1	x
P26639	Threonine--tRNA ligase, cytoplasmic	TARS	x	x
Q13428	Treacle protein	TCOF1	x	x
P17987	T-complex protein 1 subunit alpha	TCP1	x	x
P02786	Transferrin receptor protein 1;Transferrin receptor protein 1, serum form	TFRC	x	x
Q9Y490	Talin-1	TLN1	x
Q8WUH6	Transmembrane protein 263	TMEM263			x
P57088	Transmembrane protein 33	TMEM33	x
P11387	DNA topoisomerase 1	TOP1	x	x	x
Q12931	Heat shock protein 75 kDa, mitochondrial	TRAP1	x	x		x
P68371	Tubulin beta-4B chain	TUBB4B	x	x
P10599	Thioredoxin	TXN	x	x
P61088	Ubiquitin-conjugating enzyme E2 N	UBE2N	x	x	x
Q5JXB2	Putative ubiquitin-conjugating enzyme E2 N-like	UBE2NL	x		x
Q9P0L0	Vesicle-associated membrane protein-associated protein A	VAPA	x
P26640	Valine--tRNA ligase	VARS	x	x
P18206	Vinculin	VCL	x
P55072	Transitional endoplasmic reticulum ATPase	VCP	x	x	x	x
P21796	Voltage-dependent anion-selective channel protein 1	VDAC1	x
P54577	Tyrosine--tRNA ligase, cytoplasmic;Tyrosine--tRNA ligase, cytoplasmic, N-terminally processed	YARS	x	x
Q9Y5A9	YTH domain-containing family protein 2	YTHDF2	x	x	x	x
P61981	14-3-3 protein gamma;14-3-3 protein gamma, N-terminally processed	YWHAG	x	x	x					x
	ANALYTICAL PARAMETERS USED FOR THE DERIVATION OF THE 'CONFIRMATION' GROUPS
*	In this confirmation group there are the c-Myc mRNA interactors of our list belonging in at least one of the enriched GO terms groups of the functional information in TABLE S4;
**	In this confirmation group there are the c-Myc mRNA interactors of our list (1) belonging in at least one of the enriched GO terms group of the structural information or (2) with a defined RNA related domain or (3) that can be part of complexes containing structurally RNA (RNPs) or able to link RNA molecules; see TABLE S4 and specific paragraph in the paper
***	In this confirmation group there are HyPR-MS c-Myc mRNA RBPs that are noted by STRING and BioGRID analysis to interact with known c-Myc mRNA binders present in our list; see TABLE S4 and the specific paragraph.
****	In this confirmation group there are the c-Myc mRNA interactors of our list functionally involved in the metabolism of c-Myc transcript or of the nascent protein; see related paragraph.
	DIFFERENT STRATEGIES USED FOR DETERMINATION OF VALIDATION GROUPS
#	In this validation group there are the c-Myc mRNA interactors of our list that are known to bind c-Myc transcript; see TABLE S4 and text
##	In this validation group there are the c-Myc mRNA interactors of our list that are potential c-Myc transcript binders by previous in vitro studies; see text
###	In this validation group there are the c-Myc mRNA interactors of our list that are predicted c-Myc transcript binders by prediction softwares: RBPDB and RBPMAP; see text and TABLE S7, S8
####	In this validation group there are the c-Myc mRNA interactors of our list that are noted c-Myc transcript binders by previous CLIP and RIP seq data performed in k562 or HepG2 cells; see text and figure 4
#####	In this validation group there are the c-Myc mRNA interactors of our list that have been validated by RIP-qPCR experiments performed by us; see text.
