# Supplementary material for: Comprehensive in vivo identification of the c-Myc mRNA protein interactome using HyPR-MS
Source: RNA. 2019 Oct;25(10):1337–52. doi: 10.1261/rna.072157.119 (PMC6800478; doi:10.1261/rna.072157.119)
Supplement: Supplemental Material [file supp_072157.119_Supplemental_Table_S6.xlsx]

## Sheet: TABLE S6
TABLE S6 : predicted RBPs using RBPDB software interacting with different c-Myc transcript splice variants captured by HyPR-MS. Those signed in yellow are found in c-myc enriched list.

## Sheet: myc 201
myc-201
1 GGAGUUUAUU CAUAACGCGC UCUCCAAGUA UACGUGGCAA UGCGUUGCUG GGUUAUUUUA AUCAUUCUAG GCAUCGUUUU CCUCCUUAUG CCUCUAUCAU
101 UCCUCCCUAU CUACACUAAC AUCCCACGCU CUGAACGCGC GCCCAUUAAU ACCCUUCUUU CCUCCACUCU CCCUGGGACU CUUGAUCAAA GCGCGGCCCU
201 UUCCCCAGCC UUAGCGAGGC GCCCUGCAGC CUGGUACGCG CGUGGCGUGG CGGUGGGCGC GCAGUGCGUU CUCGGUGUGG AGGGCAGCUG UUCCGCCUGC
301 GAUGAUUUAU ACUCACAGGA CAAGGAUGCG GUUUGUCAAA CAGUACUGCU ACGGAGGAGC AGCAGAGAAA GGGAGAGGGU UUGAGAGGGA GCAAAAGAAA
401 AUGGUAGGCG CGCGUAGUUA AUUCAUGCGG CUCUCUUACU CUGUUUACAU CCUAGAGCUA GAGUGCUCGG CUGCCCGGCU GAGUCUCCUC CCCACCUUCC
501 CCACCCUCCC CACCCUCCCC AUAAGCGCCC CUCCCGGGUU CCCAAAGCAG AGGGCGUGGG GGAAAAGAAA AAAGAUCCUC UCUCGCUAAU CUCCGCCCAC
601 CGGCCCUUUA UAAUGCGAGG GUCUGGACGG CUGAGGACCC CCGAGCUGUG CUGCUCGCGG CCGCCACCGC CGGGCCCCGG CCGUCCCUGG CUCCCCUCCU
701 GCCUCGAGAA GGGCAGGGCU UCUCAGAGGC UUGGCGGGAA AAAGAACGGA GGGAGGGAUC GCGCUGAGUA UAAAAGCCGG UUUUCGGGGC UUUAUCUAAC
801 UCGCUGUAGU AAUUCCAGCG AGAGGCAGAG GGAGCGAGCG GGCGGCCGGC UAGGGUGGAA GAGCCGGGCG AGCAGAGCUG CGCUGCGGGC GUCCUGGGAA
901 GGGAGAUCCG GAGCGAAUAG GGGGCUUCGC CUCUGGCCCA GCCCUCCCGC UGAUCCCCCA GCCAGCGGUC CGCAACCCUU GCCGCAUCCA CGAAACUUUG
1001 CCCAUAGCAG CGGGCGGGCA CUUUGCACUG GAACUUACAA CACCCGAGCA AGGACGCGAC UCUCCCGACG CGGGGAGGCU AUUCUGCCCA UUUGGGGACA
1101 CUUCCCCGCC GCUGCCAGGA CCCGCUUCUC UGAAAGGCUC UCCUUGCAGC UGCUUAGACG CUGGAUUUUU UUCGGGUAGU GGAAAACCAG CAGCCUCCCG
1201 CGACGAUGCC CCUCAACGUU AGCUUCACCA ACAGGAACUA UGACCUCGAC UACGACUCGG UGCAGCCGUA UUUCUACUGC GACGAGGAGG AGAACUUCUA
1301 CCAGCAGCAG CAGCAGAGCG AGCUGCAGCC CCCGGCGCCC AGCGAGGAUA UCUGGAAGAA AUUCGAGCUG CUGCCCACCC CGCCCCUGUC CCCUAGCCGC
1401 CGCUCCGGGC UCUGCUCGCC CUCCUACGUU GCGGUCACAC CCUUCUCCCU UCGGGGAGAC AACGACGGCG GUGGCGGGAG CUUCUCCACG GCCGACCAGC
1501 UGGAGAUGGU GACCGAGCUG CUGGGAGGAG ACAUGGUGAA CCAGAGUUUC AUCUGCGACC CGGACGACGA GACCUUCAUC AAAAACAUCA UCAUCCAGGA
1601 CUGUAUGUGG AGCGGCUUCU CGGCCGCCGC CAAGCUCGUC UCAGAGAAGC UGGCCUCCUA CCAGGCUGCG CGCAAAGACA GCGGCAGCCC GAACCCCGCC
1701 CGCGGCCACA GCGUCUGCUC CACCUCCAGC UUGUACCUGC AGGAUCUGAG CGCCGCCGCC UCAGAGUGCA UCGACCCCUC GGUGGUCUUC CCCUACCCUC
1801 UCAACGACAG CAGCUCGCCC AAGUCCUGCG CCUCGCAAGA CUCCAGCGCC UUCUCUCCGU CCUCGGAUUC UCUGCUCUCC UCGACGGAGU CCUCCCCGCA
1901 GGGCAGCCCC GAGCCCCUGG UGCUCCAUGA GGAGACACCG CCCACCACCA GCAGCGACUC UGGAGGAACA AGAAGAUGAG GAAGAAAUCG AUGUUGUUUC
2001 UGUGGAAAAG AGGCAGGCUC CUGGCAAAAG GUCAGAGUCU GG
Score	Relative Score	RBP Name	Start	End	Matching sequence	Matrix ID	Download PWM	Download PFM
12.3119	0.81	SFRS7	1457	1466	AGACAACGAC	790_10094314	Download PWM	Download PFM
11.0851	0.9	SFRS2	361	369	AGCAGAGAA	953_7543047	Download PWM	Download PFM
10.584	0.87	SNRPA	1022	1029	UUUGCACU	661_1717938	Download PWM	Download PFM
10.1373	0.93	SFRS1	236	242	ACGCGCG	243_7543047	Download PWM	Download PFM
10.1373	0.93	SFRS1	135	141	ACGCGCG	243_7543047	Download PWM	Download PFM
9.60877	0.97	HNRNPA1	851	856	UAGGGU	23_7510636	Download PWM	Download PFM
9.53976	0.83	SFRS1	707	714	AGAAGGGC	242_7543047	Download PWM	Download PFM
9.42814	1	ybx2-a	118	123	AACAUC	114_7499328	Download PWM	Download PFM
9.42814	1	ybx2-a	1584	1589	AACAUC	114_7499328	Download PWM	Download PFM
9.37415	1	ybx2-a	118	123	AACAUC	115_7499328	Download PWM	Download PFM
9.37415	1	ybx2-a	1584	1589	AACAUC	115_7499328	Download PWM	Download PFM
9.29692	0.81	SFRS1	857	864	GGAAGAGC	242_7543047	Download PWM	Download PFM
9.14468	0.84	SFRS1	15	21	ACGCGCU	243_7543047	Download PWM	Download PFM
8.94849	1	NONO	829	833	AGGGA	488_9001221	Download PWM	Download PFM
8.94849	1	NONO	386	390	AGGGA	488_9001221	Download PWM	Download PFM
8.94849	1	NONO	370	374	AGGGA	488_9001221	Download PWM	Download PFM
8.94849	1	NONO	900	904	AGGGA	488_9001221	Download PWM	Download PFM
8.94849	1	NONO	754	758	AGGGA	488_9001221	Download PWM	Download PFM
8.94849	1	NONO	750	754	AGGGA	488_9001221	Download PWM	Download PFM
8.884	0.87	SNRPA	1501	1507	UGGAGAU	949_10094314	Download PWM	Download PFM
8.71782	1	PABPC1	1581	1585	AAAAA	24_7908267	Download PWM	Download PFM
8.71782	1	PABPC1	739	743	AAAAA	24_7908267	Download PWM	Download PFM
8.71782	1	PABPC1	568	572	AAAAA	24_7908267	Download PWM	Download PFM
8.71782	1	PABPC1	569	573	AAAAA	24_7908267	Download PWM	Download PFM
8.6696	1	RBMY1A1	1800	1804	CUCAA	1053_17318228	Download PWM	Download PFM
8.6696	1	RBMY1A1	1212	1216	CUCAA	1053_17318228	Download PWM	Download PFM
8.62722	1	RBMY1A1	1800	1804	CUCAA	1052_17318228	Download PWM	Download PFM
8.62722	1	RBMY1A1	1212	1216	CUCAA	1052_17318228	Download PWM	Download PFM
8.36291	0.91	EIF4B	734	740	GCGGGAA	351_8846295	Download PWM	Download PFM
7.94569	0.84	ybx2-a	572	577	AAGAUC	114_7499328	Download PWM	Download PFM
7.89298	0.84	ybx2-a	1039	1044	AACACC	115_7499328	Download PWM	Download PFM
7.77302	0.85	Psi	81	91	CCUCCUUAUGC	915_11565747	Download PWM	Download PFM
7.74698	0.96	SNRPA	1022	1028	UUUGCAC	1175_19561594	Download PWM	Download PFM
7.61467	0.9	PABPC1	115	121	ACUAACA	950_7908267	Download PWM	Download PFM
7.36938	1	FUS	1470	1473	GGUG	637_11098054	Download PWM	Download PFM
7.36938	1	FUS	1259	1262	GGUG	637_11098054	Download PWM	Download PFM
7.36938	1	FUS	1508	1511	GGUG	637_11098054	Download PWM	Download PFM
7.36938	1	FUS	854	857	GGUG	637_11098054	Download PWM	Download PFM
7.36938	1	FUS	252	255	GGUG	637_11098054	Download PWM	Download PFM
7.36938	1	FUS	1781	1784	GGUG	637_11098054	Download PWM	Download PFM
7.36938	1	FUS	274	277	GGUG	637_11098054	Download PWM	Download PFM
7.36938	1	FUS	1535	1538	GGUG	637_11098054	Download PWM	Download PFM
7.36938	1	FUS	1919	1922	GGUG	637_11098054	Download PWM	Download PFM
7.35091	1	ACO1	262	267	CAGUGC	1213_8021254	Download PWM	Download PFM
7.22942	1	Pum2	1602	1605	UGUA	329_11780640	Download PWM	Download PFM
7.22942	1	Pum2	1732	1735	UGUA	329_11780640	Download PWM	Download PFM
7.22942	1	Pum2	805	808	UGUA	329_11780640	Download PWM	Download PFM
7.08652	1	SFRS9	1051	1055	AGGAC	797_17548433	Download PWM	Download PFM
7.08652	1	SFRS9	634	638	AGGAC	797_17548433	Download PWM	Download PFM
7.08652	1	SFRS9	1117	1121	AGGAC	797_17548433	Download PWM	Download PFM
7.08652	1	SFRS9	1597	1601	AGGAC	797_17548433	Download PWM	Download PFM
7.08652	1	SFRS9	317	321	AGGAC	797_17548433	Download PWM	Download PFM
6.63255	0.93	SFRS9	1526	1530	AGGAG	797_17548433	Download PWM	Download PFM
6.63255	0.93	SFRS9	1288	1292	AGGAG	797_17548433	Download PWM	Download PFM
6.63255	0.93	SFRS9	1285	1289	AGGAG	797_17548433	Download PWM	Download PFM
6.63255	0.93	SFRS9	355	359	AGGAG	797_17548433	Download PWM	Download PFM
6.63255	0.93	SFRS9	1930	1934	AGGAG	797_17548433	Download PWM	Download PFM
6.62799	1	MBNL1	464	467	UGCU	669_20071745	Download PWM	Download PFM
6.62799	1	MBNL1	1921	1924	UGCU	669_20071745	Download PWM	Download PFM
6.62799	1	MBNL1	649	652	UGCU	669_20071745	Download PWM	Download PFM
6.62799	1	MBNL1	1369	1372	UGCU	669_20071745	Download PWM	Download PFM
6.62799	1	MBNL1	1151	1154	UGCU	669_20071745	Download PWM	Download PFM
6.62799	1	MBNL1	1716	1719	UGCU	669_20071745	Download PWM	Download PFM
6.62799	1	MBNL1	1519	1522	UGCU	669_20071745	Download PWM	Download PFM
6.62799	1	MBNL1	46	49	UGCU	669_20071745	Download PWM	Download PFM
6.62799	1	MBNL1	347	350	UGCU	669_20071745	Download PWM	Download PFM
6.62799	1	MBNL1	652	655	UGCU	669_20071745	Download PWM	Download PFM
6.62799	1	MBNL1	1873	1876	UGCU	669_20071745	Download PWM	Download PFM
6.62799	1	MBNL1	1413	1416	UGCU	669_20071745	Download PWM	Download PFM
6.46684	1	EIF4B	561	564	GGAA	352_8846295	Download PWM	Download PFM
6.46684	1	EIF4B	1234	1237	GGAA	352_8846295	Download PWM	Download PFM
6.46684	1	EIF4B	1181	1184	GGAA	352_8846295	Download PWM	Download PFM
6.46684	1	EIF4B	857	860	GGAA	352_8846295	Download PWM	Download PFM
6.46684	1	EIF4B	737	740	GGAA	352_8846295	Download PWM	Download PFM
6.46684	1	EIF4B	1030	1033	GGAA	352_8846295	Download PWM	Download PFM
6.46684	1	EIF4B	1965	1968	GGAA	352_8846295	Download PWM	Download PFM
6.46684	1	EIF4B	1980	1983	GGAA	352_8846295	Download PWM	Download PFM
6.46684	1	EIF4B	1354	1357	GGAA	352_8846295	Download PWM	Download PFM
6.46684	1	EIF4B	897	900	GGAA	352_8846295	Download PWM	Download PFM
6.46684	1	EIF4B	2004	2007	GGAA	352_8846295	Download PWM	Download PFM
6.33985	1	KHSRP	1388	1391	GUCC	1186_17893325	Download PWM	Download PFM
6.33985	1	KHSRP	1823	1826	GUCC	1186_17893325	Download PWM	Download PFM
6.33985	1	KHSRP	683	686	GUCC	1186_17893325	Download PWM	Download PFM
6.33985	1	KHSRP	891	894	GUCC	1186_17893325	Download PWM	Download PFM
6.33985	1	KHSRP	1859	1862	GUCC	1186_17893325	Download PWM	Download PFM
6.33985	1	KHSRP	968	971	GUCC	1186_17893325	Download PWM	Download PFM
6.33985	1	KHSRP	1889	1892	GUCC	1186_17893325	Download PWM	Download PFM
6.33891	1	YBX1	1825	1830	CCUGCG	1177_19561594	Download PWM	Download PFM
6.33891	1	YBX1	296	301	CCUGCG	1177_19561594	Download PWM	Download PFM
6.30299	0.98	Vts1	1649	1655	GCUGGCC	1176_19561594	Download PWM	Download PFM
6.17832	0.93	MBNL1	1110	1113	CGCU	669_20071745	Download PWM	Download PFM
6.17832	0.93	MBNL1	18	21	CGCU	669_20071745	Download PWM	Download PFM
6.17832	0.93	MBNL1	584	587	CGCU	669_20071745	Download PWM	Download PFM
6.17832	0.93	MBNL1	802	805	CGCU	669_20071745	Download PWM	Download PFM
6.17832	0.93	MBNL1	762	765	CGCU	669_20071745	Download PWM	Download PFM
6.17832	0.93	MBNL1	1401	1404	CGCU	669_20071745	Download PWM	Download PFM
6.17832	0.93	MBNL1	127	130	CGCU	669_20071745	Download PWM	Download PFM
6.17832	0.93	MBNL1	948	951	CGCU	669_20071745	Download PWM	Download PFM
6.17832	0.93	MBNL1	1123	1126	CGCU	669_20071745	Download PWM	Download PFM
6.17832	0.93	MBNL1	881	884	CGCU	669_20071745	Download PWM	Download PFM
6.17832	0.93	MBNL1	1159	1162	CGCU	669_20071745	Download PWM	Download PFM
6.15803	0.96	Vts1	838	844	GCGGGCG	1176_19561594	Download PWM	Download PFM
6.15803	0.96	Vts1	885	891	GCGGGCG	1176_19561594	Download PWM	Download PFM
6.15803	0.96	Vts1	1010	1016	GCGGGCG	1176_19561594	Download PWM	Download PFM
5.98045	0.95	YTHDC1	611	616	UAAUGC	969_20167602	Download PWM	Download PFM
5.98045	0.95	YTHDC1	147	152	UAAUAC	969_20167602	Download PWM	Download PFM
5.94112	0.93	YBX1	1552	1557	UCUGCG	1177_19561594	Download PWM	Download PFM
5.90423	0.92	QKI	114	123	CACUAACAUC	1215_16041388	Download PWM	Download PFM
5.83627	0.91	Vts1	1014	1020	GCGGGCA	1176_19561594	Download PWM	Download PFM
5.8261	0.91	YBX1	1665	1670	GCUGCG	1177_19561594	Download PWM	Download PFM
5.8261	0.91	YBX1	877	882	GCUGCG	1177_19561594	Download PWM	Download PFM
5.8261	0.91	YBX1	882	887	GCUGCG	1177_19561594	Download PWM	Download PFM
5.71488	0.91	YTHDC1	461	466	GAGUGC	969_20167602	Download PWM	Download PFM
5.71488	0.91	YTHDC1	1764	1769	GAGUGC	969_20167602	Download PWM	Download PFM
5.62898	0.9	YTHDC1	423	428	UCAUGC	969_20167602	Download PWM	Download PFM
5.60359	0.87	Vts1	2013	2019	GCAGGCU	1176_19561594	Download PWM	Download PFM
5.3062	0.82	Vts1	1474	1480	GCGGGAG	1176_19561594	Download PWM	Download PFM
5.27878	0.84	YTHDC1	1248	1253	GACUAC	969_20167602	Download PWM	Download PFM
5.26826	1	RBMX	1661	1664	CCAG	922_19282290	Download PWM	Download PFM
5.26826	1	RBMX	962	965	CCAG	922_19282290	Download PWM	Download PFM
5.26826	1	RBMX	1339	1342	CCAG	922_19282290	Download PWM	Download PFM
5.26826	1	RBMX	1726	1729	CCAG	922_19282290	Download PWM	Download PFM
5.26826	1	RBMX	1948	1951	CCAG	922_19282290	Download PWM	Download PFM
5.26826	1	RBMX	1115	1118	CCAG	922_19282290	Download PWM	Download PFM
5.26826	1	RBMX	1187	1190	CCAG	922_19282290	Download PWM	Download PFM
5.26826	1	RBMX	1496	1499	CCAG	922_19282290	Download PWM	Download PFM
5.26826	1	RBMX	1843	1846	CCAG	922_19282290	Download PWM	Download PFM
5.26826	1	RBMX	1595	1598	CCAG	922_19282290	Download PWM	Download PFM
5.26826	1	RBMX	1541	1544	CCAG	922_19282290	Download PWM	Download PFM
5.26826	1	RBMX	938	941	CCAG	922_19282290	Download PWM	Download PFM
5.26826	1	RBMX	958	961	CCAG	922_19282290	Download PWM	Download PFM
5.26826	1	RBMX	1301	1304	CCAG	922_19282290	Download PWM	Download PFM
5.26826	1	RBMX	205	208	CCAG	922_19282290	Download PWM	Download PFM
5.26826	1	RBMX	815	818	CCAG	922_19282290	Download PWM	Download PFM
5.25665	0.81	EIF4B	635	638	GGAC	352_8846295	Download PWM	Download PFM
5.25665	0.81	EIF4B	1598	1601	GGAC	352_8846295	Download PWM	Download PFM
5.25665	0.81	EIF4B	176	179	GGAC	352_8846295	Download PWM	Download PFM
5.25665	0.81	EIF4B	318	321	GGAC	352_8846295	Download PWM	Download PFM
5.25665	0.81	EIF4B	1562	1565	GGAC	352_8846295	Download PWM	Download PFM
5.25665	0.81	EIF4B	1118	1121	GGAC	352_8846295	Download PWM	Download PFM
5.25665	0.81	EIF4B	1052	1055	GGAC	352_8846295	Download PWM	Download PFM
5.25665	0.81	EIF4B	625	628	GGAC	352_8846295	Download PWM	Download PFM
5.25665	0.81	EIF4B	1096	1099	GGAC	352_8846295	Download PWM	Download PFM
5.22923	0.81	Vts1	713	719	GCAGGGC	1176_19561594	Download PWM	Download PFM
5.22923	0.81	Vts1	1898	1904	GCAGGGC	1176_19561594	Download PWM	Download PFM
5.19994	0.81	Vts1	1499	1505	GCUGGAG	1176_19561594	Download PWM	Download PFM
5.17797	0.83	YTHDC1	984	989	GCAUCC	969_20167602	Download PWM	Download PFM
5.11052	1	SFRS13A	741	747	AAAGAAC	1169_19561594	Download PWM	Download PFM
5.09234	0.8	YBX1	1276	1281	ACUGCG	1177_19561594	Download PWM	Download PFM
5.02352	0.8	YTHDC1	1275	1280	UACUGC	969_20167602	Download PWM	Download PFM
5.02352	0.8	YTHDC1	344	349	UACUGC	969_20167602	Download PWM	Download PFM
5.00861	0.8	YTHDC1	1887	1892	GAGUCC	969_20167602	Download PWM	Download PFM
4.99862	0.94	RBMX	1925	1928	CCAU	922_19282290	Download PWM	Download PFM
4.99862	0.94	RBMX	1088	1091	CCAU	922_19282290	Download PWM	Download PFM
4.99862	0.94	RBMX	1002	1005	CCAU	922_19282290	Download PWM	Download PFM
4.99862	0.94	RBMX	143	146	CCAU	922_19282290	Download PWM	Download PFM
4.99862	0.94	RBMX	519	522	CCAU	922_19282290	Download PWM	Download PFM
4.84133	1	RBM4	237	240	CGCG	1172_19561594	Download PWM	Download PFM
4.84133	1	RBM4	1069	1072	CGCG	1172_19561594	Download PWM	Download PFM
4.84133	1	RBM4	411	414	CGCG	1172_19561594	Download PWM	Download PFM
4.84133	1	RBM4	138	141	CGCG	1172_19561594	Download PWM	Download PFM
4.84133	1	RBM4	192	195	CGCG	1172_19561594	Download PWM	Download PFM
4.84133	1	RBM4	258	261	CGCG	1172_19561594	Download PWM	Download PFM
4.84133	1	RBM4	1055	1058	CGCG	1172_19561594	Download PWM	Download PFM
4.84133	1	RBM4	1669	1672	CGCG	1172_19561594	Download PWM	Download PFM
4.84133	1	RBM4	656	659	CGCG	1172_19561594	Download PWM	Download PFM
4.84133	1	RBM4	409	412	CGCG	1172_19561594	Download PWM	Download PFM
4.84133	1	RBM4	16	19	CGCG	1172_19561594	Download PWM	Download PFM
4.84133	1	RBM4	136	139	CGCG	1172_19561594	Download PWM	Download PFM
4.84133	1	RBM4	760	763	CGCG	1172_19561594	Download PWM	Download PFM
4.84133	1	RBM4	1701	1704	CGCG	1172_19561594	Download PWM	Download PFM
4.84133	1	RBM4	1199	1202	CGCG	1172_19561594	Download PWM	Download PFM
4.84133	1	RBM4	239	242	CGCG	1172_19561594	Download PWM	Download PFM
4.77427	0.93	SFRS13A	2007	2013	AAAGAGG	1169_19561594	Download PWM	Download PFM
4.68843	0.91	SFRS13A	571	577	AAAGAUC	1169_19561594	Download PWM	Download PFM
4.66672	0.88	RBMX	1945	1948	CCAC	922_19282290	Download PWM	Download PFM
4.66672	0.88	RBMX	664	667	CCAC	922_19282290	Download PWM	Download PFM
4.66672	0.88	RBMX	1486	1489	CCAC	922_19282290	Download PWM	Download PFM
4.66672	0.88	RBMX	164	167	CCAC	922_19282290	Download PWM	Download PFM
4.66672	0.88	RBMX	988	991	CCAC	922_19282290	Download PWM	Download PFM
4.66672	0.88	RBMX	1706	1709	CCAC	922_19282290	Download PWM	Download PFM
4.66672	0.88	RBMX	1942	1945	CCAC	922_19282290	Download PWM	Download PFM
4.66672	0.88	RBMX	492	495	CCAC	922_19282290	Download PWM	Download PFM
4.66672	0.88	RBMX	1375	1378	CCAC	922_19282290	Download PWM	Download PFM
4.66672	0.88	RBMX	510	513	CCAC	922_19282290	Download PWM	Download PFM
4.66672	0.88	RBMX	501	504	CCAC	922_19282290	Download PWM	Download PFM
4.66672	0.88	RBMX	597	600	CCAC	922_19282290	Download PWM	Download PFM
4.66672	0.88	RBMX	124	127	CCAC	922_19282290	Download PWM	Download PFM
4.66672	0.88	RBMX	1720	1723	CCAC	922_19282290	Download PWM	Download PFM
4.66544	0.91	SFRS13A	2027	2033	AAAGGUC	1169_19561594	Download PWM	Download PFM
4.62029	1	SFRS1	1051	1054	AGGA	1173_19561594	Download PWM	Download PFM
4.62029	1	SFRS1	634	637	AGGA	1173_19561594	Download PWM	Download PFM
4.62029	1	SFRS1	1526	1529	AGGA	1173_19561594	Download PWM	Download PFM
4.62029	1	SFRS1	1117	1120	AGGA	1173_19561594	Download PWM	Download PFM
4.62029	1	SFRS1	1597	1600	AGGA	1173_19561594	Download PWM	Download PFM
4.62029	1	SFRS1	1979	1982	AGGA	1173_19561594	Download PWM	Download PFM
4.62029	1	SFRS1	1288	1291	AGGA	1173_19561594	Download PWM	Download PFM
4.62029	1	SFRS1	1233	1236	AGGA	1173_19561594	Download PWM	Download PFM
4.62029	1	SFRS1	1964	1967	AGGA	1173_19561594	Download PWM	Download PFM
4.62029	1	SFRS1	1285	1288	AGGA	1173_19561594	Download PWM	Download PFM
4.62029	1	SFRS1	323	326	AGGA	1173_19561594	Download PWM	Download PFM
4.62029	1	SFRS1	355	358	AGGA	1173_19561594	Download PWM	Download PFM
4.62029	1	SFRS1	1345	1348	AGGA	1173_19561594	Download PWM	Download PFM
4.62029	1	SFRS1	1741	1744	AGGA	1173_19561594	Download PWM	Download PFM
4.62029	1	SFRS1	317	320	AGGA	1173_19561594	Download PWM	Download PFM
4.62029	1	SFRS1	1930	1933	AGGA	1173_19561594	Download PWM	Download PFM
4.604	0.98	KHDRBS3	609	614	UAUAAU	1174_19561594	Download PWM	Download PFM
4.56783	0.89	SFRS13A	1133	1139	AAAGGCU	1169_19561594	Download PWM	Download PFM
4.52871	0.88	SFRS13A	394	400	AAAGAAA	1169_19561594	Download PWM	Download PFM
4.52871	0.88	SFRS13A	564	570	AAAGAAA	1169_19561594	Download PWM	Download PFM
4.48547	0.87	SFRS13A	549	555	AGAGGGC	1169_19561594	Download PWM	Download PFM
4.47729	0.87	SFRS13A	368	374	AAAGGGA	1169_19561594	Download PWM	Download PFM
4.41889	0.94	KHDRBS3	145	150	AUUAAU	1174_19561594	Download PWM	Download PFM
4.40359	1	ELAVL1	379	382	GUUU	1170_19561594	Download PWM	Download PFM
4.40359	1	ELAVL1	1996	1999	GUUU	1170_19561594	Download PWM	Download PFM
4.40359	1	ELAVL1	331	334	GUUU	1170_19561594	Download PWM	Download PFM
4.40359	1	ELAVL1	443	446	GUUU	1170_19561594	Download PWM	Download PFM
4.40359	1	ELAVL1	1546	1549	GUUU	1170_19561594	Download PWM	Download PFM
4.40359	1	ELAVL1	780	783	GUUU	1170_19561594	Download PWM	Download PFM
4.40359	1	ELAVL1	76	79	GUUU	1170_19561594	Download PWM	Download PFM
4.40359	1	ELAVL1	4	7	GUUU	1170_19561594	Download PWM	Download PFM
4.40271	0.83	RBMX	1064	1067	CCCG	922_19282290	Download PWM	Download PFM
4.40271	0.83	RBMX	1908	1911	CCCG	922_19282290	Download PWM	Download PFM
4.40271	0.83	RBMX	1699	1702	CCCG	922_19282290	Download PWM	Download PFM
4.40271	0.83	RBMX	533	536	CCCG	922_19282290	Download PWM	Download PFM
4.40271	0.83	RBMX	1379	1382	CCCG	922_19282290	Download PWM	Download PFM
4.40271	0.83	RBMX	1695	1698	CCCG	922_19282290	Download PWM	Download PFM
4.40271	0.83	RBMX	1197	1200	CCCG	922_19282290	Download PWM	Download PFM
4.40271	0.83	RBMX	1688	1691	CCCG	922_19282290	Download PWM	Download PFM
4.40271	0.83	RBMX	1105	1108	CCCG	922_19282290	Download PWM	Download PFM
4.40271	0.83	RBMX	1043	1046	CCCG	922_19282290	Download PWM	Download PFM
4.40271	0.83	RBMX	946	949	CCCG	922_19282290	Download PWM	Download PFM
4.40271	0.83	RBMX	676	679	CCCG	922_19282290	Download PWM	Download PFM
4.40271	0.83	RBMX	1895	1898	CCCG	922_19282290	Download PWM	Download PFM
4.40271	0.83	RBMX	1331	1334	CCCG	922_19282290	Download PWM	Download PFM
4.40271	0.83	RBMX	1559	1562	CCCG	922_19282290	Download PWM	Download PFM
4.40271	0.83	RBMX	640	643	CCCG	922_19282290	Download PWM	Download PFM
4.40271	0.83	RBMX	1121	1124	CCCG	922_19282290	Download PWM	Download PFM
4.40271	0.83	RBMX	474	477	CCCG	922_19282290	Download PWM	Download PFM
4.38061	0.85	SFRS13A	1674	1680	AAAGACA	1169_19561594	Download PWM	Download PFM
4.3708	0.93	KHDRBS3	57	62	UUUAAU	1174_19561594	Download PWM	Download PFM
4.27749	0.91	KHDRBS3	769	774	UAUAAA	1174_19561594	Download PWM	Download PFM
4.26583	0.91	KHDRBS3	585	590	GCUAAU	1174_19561594	Download PWM	Download PFM
4.22907	0.82	SFRS13A	1643	1649	AGAGAAG	1169_19561594	Download PWM	Download PFM
4.21607	0.9	KHDRBS3	417	422	GUUAAU	1174_19561594	Download PWM	Download PFM
4.21373	0.82	SFRS13A	1049	1055	CAAGGAC	1169_19561594	Download PWM	Download PFM
4.20071	0.9	KHDRBS3	808	813	AGUAAU	1174_19561594	Download PWM	Download PFM
4.18818	0.9	SFRS1	2003	2006	UGGA	1173_19561594	Download PWM	Download PFM
4.18818	0.9	SFRS1	1162	1165	UGGA	1173_19561594	Download PWM	Download PFM
4.18818	0.9	SFRS1	1029	1032	UGGA	1173_19561594	Download PWM	Download PFM
4.18818	0.9	SFRS1	624	627	UGGA	1173_19561594	Download PWM	Download PFM
4.18818	0.9	SFRS1	1180	1183	UGGA	1173_19561594	Download PWM	Download PFM
4.18818	0.9	SFRS1	1608	1611	UGGA	1173_19561594	Download PWM	Download PFM
4.18818	0.9	SFRS1	1353	1356	UGGA	1173_19561594	Download PWM	Download PFM
4.18818	0.9	SFRS1	1501	1504	UGGA	1173_19561594	Download PWM	Download PFM
4.18818	0.9	SFRS1	856	859	UGGA	1173_19561594	Download PWM	Download PFM
4.18818	0.9	SFRS1	1961	1964	UGGA	1173_19561594	Download PWM	Download PFM
4.18818	0.9	SFRS1	278	281	UGGA	1173_19561594	Download PWM	Download PFM
4.11387	0.8	SFRS13A	374	380	AGAGGGU	1169_19561594	Download PWM	Download PFM
3.97264	0.85	KHDRBS3	11	16	CAUAAC	1174_19561594	Download PWM	Download PFM
3.83729	0.82	KHDRBS3	115	120	ACUAAC	1174_19561594	Download PWM	Download PFM
3.82636	0.86	ELAVL1	1090	1093	AUUU	1170_19561594	Download PWM	Download PFM
3.82636	0.86	ELAVL1	1270	1273	AUUU	1170_19561594	Download PWM	Download PFM
3.82636	0.86	ELAVL1	1165	1168	AUUU	1170_19561594	Download PWM	Download PFM
3.82636	0.86	ELAVL1	305	308	AUUU	1170_19561594	Download PWM	Download PFM
3.82636	0.86	ELAVL1	55	58	AUUU	1170_19561594	Download PWM	Download PFM
3.7892	0.81	KHDRBS3	795	800	UCUAAC	1174_19561594	Download PWM	Download PFM

## Sheet: myc 207
myc 207
1 GACCCCCGAG CUGUGCUGCU CGCGGCCGCC ACCGCCGGGC CCCGGCCGUC CCUGGCUCCC CUCCUGCCUC GAGAAGGGCA GGGCUUCUCA GAGGCUUGGC
101 GGGAAAAAGA ACGGAGGGAG GGAUCGCGCU GAGUAUAAAA GCCGGUUUUC GGGGCUUUAU CUAACUCGCU GUAGUAAUUC CAGCGAGAGG CAGAGGGAGC
201 GAGCGGGCGG CCGGCUAGGG UGGAAGAGCC GGGCGAGCAG AGCUGCGCUG CGGGCGUCCU GGGAAGGGAG AUCCGGAGCG AAUAGGGGGC UUCGCCUCUG
301 GCCCAGCCCU CCCGCUGAUC CCCCAGCCAG CGGUCCGCAA CCCUUGCCGC AUCCACGAAA CUUUGCCCAU AGCAGCGGGC GGGCACUUUG CACUGGAACU
401 UACAACACCC GAGCAAGGAC GCGACUCUCC CGACGCGGGG AGGCUAUUCU GCCCAUUUGG GGACACUUCC CCGCCGCUGC CAGGACCCGC UUCUCUGAAA
501 GGCUCUCCUU GCAGCUGCUU AGACGCUGGA UUUUUUUCGG GUAGUGGAAA ACCAGCAGCC UCCCGCGACG AUGCCCCUCA ACGUUAGCUU CACCAACAGG
601 AACUAUGACC UCGACUACGA CUCGGUGCAG CCGUAUUUCU ACUGCGACGA GGAGGAGAAC UUCUACCAGC AGCAGCAGCA GAGCGAGCUG CAGCCCCCGG
701 CGCCCAGCGA GGAUAUCUGG AAGAAAUUCG AGCUGCUGCC CACCCCGCCC CUGUCCCCUA GCCGCCGCUC CGGGCUCUGC UCGCCCUCCU ACGUUGCGGU
801 CACACCCUUC UCCCUUCGGG GAGACAACGA CGGCGGUGGC GGGAGCUUCU CCACGGCCGA CCAGCUGGAG AUGGUGACCG AGCUGCUGGG AGGAGACAUG
901 GUGAACCAGA GUUUCAUCUG CGACCCGGAC GACGAGACCU UCAUCAAAAA CAUCAUCAUC CAGGACUGUA UGUGGAGCGG CUUCUCGGCC GCCGCCAAGC
1001 UCGUCUCAGA GAAGCUGGCC UCCUACCAGG CUGCGCGCAA AGACAGCGGC AGCCCGAACC CCGCCCGCGG CCACAGCGUC UGCUCCACCU CCAGCUUGUA
1101 CCUGCAGGAU CUGAGCGCCG CCGCCUCAGA GUGCAUCGAC CCCUCGGUGG UCUUCCCCUA CCCUCUCAAC GACAGCAGCU CGCCCAAGUC CUGCGCCUCG
1201 CAAGACUCCA GCGCCUUCUC UCCGUCCUCG GAUUCUCUGC UCUCCUCGAC GGAGUCCUCC CCGCAGGGCA GCCCCGAGCC CCUGGUGCUC CAUGAGGAGA
1301 CACCGCCCAC CACCAGCAGC GACUCUGAGG AGGAACAAGA AGAUGAGGAA GAAAUCGAUG UUGUUUCUGU GGAAAAGAGG CAGGCUCCUG GCAAAAGGUC
1401 AGAGUCUGGA UCACCUUCUG CUGGAGGCCA CAGCAAACCU CCUCACAGCC CACUGGUCCU CAAGAGGUGC CACGUCUCCA CACAUCAGCA CAACUACGCA
1501 GCGCCUCCCU CCACUCGGAA GGACUAUCCU GCUGCCAAGA GGGUCAAGUU GGACAGUGUC AGAGUCCUGA GACAGAUCAG CAACAACCGA AAAUGCACCA
1601 GCCCCAGGUC CUCGGACACC GAGGAGAAUG UCAAGAGGCG AACACACAAC GUCUUGGAGC GCCAGAGGAG GAACGAGCUA AAACGGAGCU UUUUUGCCCU
1701 GCGUGACCAG AUCCCGGAGU UGGAAAACAA UGAAAAGGCC CCCAAGGUAG UUAUCCUUAA AAAAGCCACA GCAUACAUCC UGUCCGUCCA AGCAGAGGAG
1801 CAAAAGCUCA UUUCUGAAGA GGACUUGUUG CGGAAACGAC GAGAACAGUU GAAACACAAA CUUGAACAGC UACGGAACUC UUGUGCGUAA GGAAAAGUAA
1901 GGAAAACGAU UCCUUCUAAC AGAAAUGUCC UGAGCAAUCA CCUAUGAACU UGUUUCAAAU GCAUGAUCAA AUGCAACCUC ACAACCUUGG CUGAGUCUUG
2001 AGACUGAAAG AUUUAGCCAU AAUGUAAACU GCCUCAAAUU GGACUUUGGG CAUAAAAGAA CUUUUUUAUG CUUACCAUCU UUUUUUUUUC UUUAACAGAU
2101 UUGUAUUUAA GAAUUGUUUU UAAAAAAUUU UAAGAUUUAC ACAAUGUUUC UCUGUAAAUA UUGCCAUUAA AUGUAAAUAA CUUUAAUAAA ACGUUUAUAG
2201 CAGUUACACA GAAUUUCAAU CCUAGUAUAU AGUACCUAGU AUUAUAGGUA CUAUAAACCC UAAUUUUUUU UAUUUAAGUA CAUUUUGCUU UUUAAAGUUG
2301 AUUUUUUUCU AUUGUUUUUA GAAAAAAUAA AAUAACUGGC AAAUAUAUCA UUGAGCCAAA UCUUAA
Score	Relative Score	RBP Name	Start	End	Matching sequence	Matrix ID	Download PWM	Download PFM
17.1026	0.82	pum	2170	2185	AAUGUAAAUAACUUUA	323_16537387	Download PWM	Download PFM
13.3659	0.95	ELAVL2	2268	2276	UUUUAUUUA	783_7972035	Download PWM	Download PFM
12.3119	0.81	SFRS7	822	831	AGACAACGAC	790_10094314	Download PWM	Download PFM
12.0085	0.87	ZFP36	2270	2278	UUAUUUAAG	951_12324455	Download PWM	Download PFM
11.0709	1	A2BP1	1960	1965	UGCAUG	37_16537540	Download PWM	Download PFM
10.8718	0.88	SFRS2	1791	1799	AGCAGAGGA	953_7543047	Download PWM	Download PFM
10.584	0.87	SNRPA	387	394	UUUGCACU	661_1717938	Download PWM	Download PFM
10.1697	0.88	SFRS1	1517	1524	GGAAGGAC	242_7543047	Download PWM	Download PFM
9.60877	0.97	HNRNPA1	216	221	UAGGGU	23_7510636	Download PWM	Download PFM
9.53976	0.83	SFRS1	72	79	AGAAGGGC	242_7543047	Download PWM	Download PFM
9.43168	1	EIF4B	1719	1725	GUUGGAA	350_8846295	Download PWM	Download PFM
9.42814	1	ybx2-a	949	954	AACAUC	114_7499328	Download PWM	Download PFM
9.37415	1	ybx2-a	949	954	AACAUC	115_7499328	Download PWM	Download PFM
9.29692	0.81	SFRS1	222	229	GGAAGAGC	242_7543047	Download PWM	Download PFM
8.94849	1	NONO	194	198	AGGGA	488_9001221	Download PWM	Download PFM
8.94849	1	NONO	265	269	AGGGA	488_9001221	Download PWM	Download PFM
8.94849	1	NONO	119	123	AGGGA	488_9001221	Download PWM	Download PFM
8.94849	1	NONO	115	119	AGGGA	488_9001221	Download PWM	Download PFM
8.884	0.87	SNRPA	866	872	UGGAGAU	949_10094314	Download PWM	Download PFM
8.71782	1	PABPC1	1759	1763	AAAAA	24_7908267	Download PWM	Download PFM
8.71782	1	PABPC1	2322	2326	AAAAA	24_7908267	Download PWM	Download PFM
8.71782	1	PABPC1	2122	2126	AAAAA	24_7908267	Download PWM	Download PFM
8.71782	1	PABPC1	1760	1764	AAAAA	24_7908267	Download PWM	Download PFM
8.71782	1	PABPC1	2123	2127	AAAAA	24_7908267	Download PWM	Download PFM
8.71782	1	PABPC1	2323	2327	AAAAA	24_7908267	Download PWM	Download PFM
8.71782	1	PABPC1	946	950	AAAAA	24_7908267	Download PWM	Download PFM
8.71782	1	PABPC1	104	108	AAAAA	24_7908267	Download PWM	Download PFM
8.6696	1	RBMY1A1	1459	1463	CUCAA	1053_17318228	Download PWM	Download PFM
8.6696	1	RBMY1A1	1165	1169	CUCAA	1053_17318228	Download PWM	Download PFM
8.6696	1	RBMY1A1	2033	2037	CUCAA	1053_17318228	Download PWM	Download PFM
8.6696	1	RBMY1A1	577	581	CUCAA	1053_17318228	Download PWM	Download PFM
8.6471	1	a2bp1	1961	1965	GCAUG	36_12574126	Download PWM	Download PFM
8.62722	1	RBMY1A1	1459	1463	CUCAA	1052_17318228	Download PWM	Download PFM
8.62722	1	RBMY1A1	1165	1169	CUCAA	1052_17318228	Download PWM	Download PFM
8.62722	1	RBMY1A1	2033	2037	CUCAA	1052_17318228	Download PWM	Download PFM
8.62722	1	RBMY1A1	577	581	CUCAA	1052_17318228	Download PWM	Download PFM
8.36291	0.91	EIF4B	99	105	GCGGGAA	351_8846295	Download PWM	Download PFM
8.08803	0.85	EIF4B	1548	1554	GUUGGAC	350_8846295	Download PWM	Download PFM
8.04688	0.88	EIF4B	1830	1836	GCGGAAA	351_8846295	Download PWM	Download PFM
7.89298	0.84	ybx2-a	404	409	AACACC	115_7499328	Download PWM	Download PFM
7.74698	0.96	SNRPA	387	393	UUUGCAC	1175_19561594	Download PWM	Download PFM
7.65634	0.88	RBMY1A1	1645	1649	CACAA	1052_17318228	Download PWM	Download PFM
7.65634	0.88	RBMY1A1	1855	1859	CACAA	1052_17318228	Download PWM	Download PFM
7.65634	0.88	RBMY1A1	1980	1984	CACAA	1052_17318228	Download PWM	Download PFM
7.65634	0.88	RBMY1A1	1489	1493	CACAA	1052_17318228	Download PWM	Download PFM
7.65634	0.88	RBMY1A1	2140	2144	CACAA	1052_17318228	Download PWM	Download PFM
7.56224	0.86	sap-49	1701	1706	GCGUGA	145_9163526	Download PWM	Download PFM
7.36938	1	FUS	835	838	GGUG	637_11098054	Download PWM	Download PFM
7.36938	1	FUS	1284	1287	GGUG	637_11098054	Download PWM	Download PFM
7.36938	1	FUS	873	876	GGUG	637_11098054	Download PWM	Download PFM
7.36938	1	FUS	900	903	GGUG	637_11098054	Download PWM	Download PFM
7.36938	1	FUS	219	222	GGUG	637_11098054	Download PWM	Download PFM
7.36938	1	FUS	1466	1469	GGUG	637_11098054	Download PWM	Download PFM
7.36938	1	FUS	624	627	GGUG	637_11098054	Download PWM	Download PFM
7.36938	1	FUS	1146	1149	GGUG	637_11098054	Download PWM	Download PFM
7.22942	1	Pum2	2023	2026	UGUA	329_11780640	Download PWM	Download PFM
7.22942	1	Pum2	2172	2175	UGUA	329_11780640	Download PWM	Download PFM
7.22942	1	Pum2	967	970	UGUA	329_11780640	Download PWM	Download PFM
7.22942	1	Pum2	2102	2105	UGUA	329_11780640	Download PWM	Download PFM
7.22942	1	Pum2	2153	2156	UGUA	329_11780640	Download PWM	Download PFM
7.22942	1	Pum2	1097	1100	UGUA	329_11780640	Download PWM	Download PFM
7.22942	1	Pum2	170	173	UGUA	329_11780640	Download PWM	Download PFM
7.08652	1	SFRS9	962	966	AGGAC	797_17548433	Download PWM	Download PFM
7.08652	1	SFRS9	1820	1824	AGGAC	797_17548433	Download PWM	Download PFM
7.08652	1	SFRS9	482	486	AGGAC	797_17548433	Download PWM	Download PFM
7.08652	1	SFRS9	416	420	AGGAC	797_17548433	Download PWM	Download PFM
7.08652	1	SFRS9	1520	1524	AGGAC	797_17548433	Download PWM	Download PFM
6.83499	0.8	PTBP1	2057	2071	AGAACUUUUUUAUGC	1171_19561594	Download PWM	Download PFM
6.63255	0.93	SFRS9	653	657	AGGAG	797_17548433	Download PWM	Download PFM
6.63255	0.93	SFRS9	1295	1299	AGGAG	797_17548433	Download PWM	Download PFM
6.63255	0.93	SFRS9	650	654	AGGAG	797_17548433	Download PWM	Download PFM
6.63255	0.93	SFRS9	891	895	AGGAG	797_17548433	Download PWM	Download PFM
6.63255	0.93	SFRS9	1796	1800	AGGAG	797_17548433	Download PWM	Download PFM
6.63255	0.93	SFRS9	1622	1626	AGGAG	797_17548433	Download PWM	Download PFM
6.63255	0.93	SFRS9	1328	1332	AGGAG	797_17548433	Download PWM	Download PFM
6.63255	0.93	SFRS9	1666	1670	AGGAG	797_17548433	Download PWM	Download PFM
6.62799	1	MBNL1	2286	2289	UGCU	669_20071745	Download PWM	Download PFM
6.62799	1	MBNL1	1419	1422	UGCU	669_20071745	Download PWM	Download PFM
6.62799	1	MBNL1	884	887	UGCU	669_20071745	Download PWM	Download PFM
6.62799	1	MBNL1	14	17	UGCU	669_20071745	Download PWM	Download PFM
6.62799	1	MBNL1	2069	2072	UGCU	669_20071745	Download PWM	Download PFM
6.62799	1	MBNL1	778	781	UGCU	669_20071745	Download PWM	Download PFM
6.62799	1	MBNL1	1286	1289	UGCU	669_20071745	Download PWM	Download PFM
6.62799	1	MBNL1	516	519	UGCU	669_20071745	Download PWM	Download PFM
6.62799	1	MBNL1	734	737	UGCU	669_20071745	Download PWM	Download PFM
6.62799	1	MBNL1	17	20	UGCU	669_20071745	Download PWM	Download PFM
6.62799	1	MBNL1	1081	1084	UGCU	669_20071745	Download PWM	Download PFM
6.62799	1	MBNL1	1238	1241	UGCU	669_20071745	Download PWM	Download PFM
6.62799	1	MBNL1	1530	1533	UGCU	669_20071745	Download PWM	Download PFM
6.56698	0.89	ACO1	1554	1559	CAGUGU	1213_8021254	Download PWM	Download PFM
6.46684	1	EIF4B	102	105	GGAA	352_8846295	Download PWM	Download PFM
6.46684	1	EIF4B	546	549	GGAA	352_8846295	Download PWM	Download PFM
6.46684	1	EIF4B	1332	1335	GGAA	352_8846295	Download PWM	Download PFM
6.46684	1	EIF4B	1891	1894	GGAA	352_8846295	Download PWM	Download PFM
6.46684	1	EIF4B	1722	1725	GGAA	352_8846295	Download PWM	Download PFM
6.46684	1	EIF4B	1874	1877	GGAA	352_8846295	Download PWM	Download PFM
6.46684	1	EIF4B	1347	1350	GGAA	352_8846295	Download PWM	Download PFM
6.46684	1	EIF4B	1371	1374	GGAA	352_8846295	Download PWM	Download PFM
6.46684	1	EIF4B	222	225	GGAA	352_8846295	Download PWM	Download PFM
6.46684	1	EIF4B	1670	1673	GGAA	352_8846295	Download PWM	Download PFM
6.46684	1	EIF4B	1832	1835	GGAA	352_8846295	Download PWM	Download PFM
6.46684	1	EIF4B	1901	1904	GGAA	352_8846295	Download PWM	Download PFM
6.46684	1	EIF4B	599	602	GGAA	352_8846295	Download PWM	Download PFM
6.46684	1	EIF4B	719	722	GGAA	352_8846295	Download PWM	Download PFM
6.46684	1	EIF4B	395	398	GGAA	352_8846295	Download PWM	Download PFM
6.46684	1	EIF4B	262	265	GGAA	352_8846295	Download PWM	Download PFM
6.46684	1	EIF4B	1517	1520	GGAA	352_8846295	Download PWM	Download PFM
6.33985	1	KHSRP	1786	1789	GUCC	1186_17893325	Download PWM	Download PFM
6.33985	1	KHSRP	1927	1930	GUCC	1186_17893325	Download PWM	Download PFM
6.33985	1	KHSRP	1254	1257	GUCC	1186_17893325	Download PWM	Download PFM
6.33985	1	KHSRP	1782	1785	GUCC	1186_17893325	Download PWM	Download PFM
6.33985	1	KHSRP	256	259	GUCC	1186_17893325	Download PWM	Download PFM
6.33985	1	KHSRP	1564	1567	GUCC	1186_17893325	Download PWM	Download PFM
6.33985	1	KHSRP	1224	1227	GUCC	1186_17893325	Download PWM	Download PFM
6.33985	1	KHSRP	753	756	GUCC	1186_17893325	Download PWM	Download PFM
6.33985	1	KHSRP	1608	1611	GUCC	1186_17893325	Download PWM	Download PFM
6.33985	1	KHSRP	333	336	GUCC	1186_17893325	Download PWM	Download PFM
6.33985	1	KHSRP	48	51	GUCC	1186_17893325	Download PWM	Download PFM
6.33985	1	KHSRP	1188	1191	GUCC	1186_17893325	Download PWM	Download PFM
6.33985	1	KHSRP	1456	1459	GUCC	1186_17893325	Download PWM	Download PFM
6.33891	1	YBX1	1698	1703	CCUGCG	1177_19561594	Download PWM	Download PFM
6.33891	1	YBX1	1190	1195	CCUGCG	1177_19561594	Download PWM	Download PFM
6.30299	0.98	Vts1	1014	1020	GCUGGCC	1176_19561594	Download PWM	Download PFM
6.17832	0.93	MBNL1	475	478	CGCU	669_20071745	Download PWM	Download PFM
6.17832	0.93	MBNL1	524	527	CGCU	669_20071745	Download PWM	Download PFM
6.17832	0.93	MBNL1	488	491	CGCU	669_20071745	Download PWM	Download PFM
6.17832	0.93	MBNL1	766	769	CGCU	669_20071745	Download PWM	Download PFM
6.17832	0.93	MBNL1	313	316	CGCU	669_20071745	Download PWM	Download PFM
6.17832	0.93	MBNL1	127	130	CGCU	669_20071745	Download PWM	Download PFM
6.17832	0.93	MBNL1	246	249	CGCU	669_20071745	Download PWM	Download PFM
6.17832	0.93	MBNL1	167	170	CGCU	669_20071745	Download PWM	Download PFM
6.15803	0.96	Vts1	203	209	GCGGGCG	1176_19561594	Download PWM	Download PFM
6.15803	0.96	Vts1	250	256	GCGGGCG	1176_19561594	Download PWM	Download PFM
6.15803	0.96	Vts1	375	381	GCGGGCG	1176_19561594	Download PWM	Download PFM
5.94112	0.93	YBX1	917	922	UCUGCG	1177_19561594	Download PWM	Download PFM
5.88424	0.94	YTHDC1	1771	1776	GCAUAC	969_20167602	Download PWM	Download PFM
5.83627	0.91	Vts1	379	385	GCGGGCA	1176_19561594	Download PWM	Download PFM
5.83023	0.82	SFRS9	1487	1491	AGCAC	797_17548433	Download PWM	Download PFM
5.8261	0.91	YBX1	247	252	GCUGCG	1177_19561594	Download PWM	Download PFM
5.8261	0.91	YBX1	1030	1035	GCUGCG	1177_19561594	Download PWM	Download PFM
5.8261	0.91	YBX1	242	247	GCUGCG	1177_19561594	Download PWM	Download PFM
5.71488	0.91	YTHDC1	1129	1134	GAGUGC	969_20167602	Download PWM	Download PFM
5.60359	0.87	Vts1	1380	1386	GCAGGCU	1176_19561594	Download PWM	Download PFM
5.45962	0.87	YTHDC1	2230	2235	UAGUAC	969_20167602	Download PWM	Download PFM
5.3062	0.82	Vts1	839	845	GCGGGAG	1176_19561594	Download PWM	Download PFM
5.27878	0.84	YTHDC1	613	618	GACUAC	969_20167602	Download PWM	Download PFM
5.26826	1	RBMX	1598	1601	CCAG	922_19282290	Download PWM	Download PFM
5.26826	1	RBMX	861	864	CCAG	922_19282290	Download PWM	Download PFM
5.26826	1	RBMX	666	669	CCAG	922_19282290	Download PWM	Download PFM
5.26826	1	RBMX	1208	1211	CCAG	922_19282290	Download PWM	Download PFM
5.26826	1	RBMX	327	330	CCAG	922_19282290	Download PWM	Download PFM
5.26826	1	RBMX	1662	1665	CCAG	922_19282290	Download PWM	Download PFM
5.26826	1	RBMX	323	326	CCAG	922_19282290	Download PWM	Download PFM
5.26826	1	RBMX	1707	1710	CCAG	922_19282290	Download PWM	Download PFM
5.26826	1	RBMX	906	909	CCAG	922_19282290	Download PWM	Download PFM
5.26826	1	RBMX	303	306	CCAG	922_19282290	Download PWM	Download PFM
5.26826	1	RBMX	180	183	CCAG	922_19282290	Download PWM	Download PFM
5.26826	1	RBMX	480	483	CCAG	922_19282290	Download PWM	Download PFM
5.26826	1	RBMX	960	963	CCAG	922_19282290	Download PWM	Download PFM
5.26826	1	RBMX	1313	1316	CCAG	922_19282290	Download PWM	Download PFM
5.26826	1	RBMX	1091	1094	CCAG	922_19282290	Download PWM	Download PFM
5.26826	1	RBMX	1026	1029	CCAG	922_19282290	Download PWM	Download PFM
5.26826	1	RBMX	1604	1607	CCAG	922_19282290	Download PWM	Download PFM
5.26826	1	RBMX	552	555	CCAG	922_19282290	Download PWM	Download PFM
5.26826	1	RBMX	704	707	CCAG	922_19282290	Download PWM	Download PFM
5.25665	0.81	EIF4B	1551	1554	GGAC	352_8846295	Download PWM	Download PFM
5.25665	0.81	EIF4B	1614	1617	GGAC	352_8846295	Download PWM	Download PFM
5.25665	0.81	EIF4B	927	930	GGAC	352_8846295	Download PWM	Download PFM
5.25665	0.81	EIF4B	1821	1824	GGAC	352_8846295	Download PWM	Download PFM
5.25665	0.81	EIF4B	483	486	GGAC	352_8846295	Download PWM	Download PFM
5.25665	0.81	EIF4B	2041	2044	GGAC	352_8846295	Download PWM	Download PFM
5.25665	0.81	EIF4B	1521	1524	GGAC	352_8846295	Download PWM	Download PFM
5.25665	0.81	EIF4B	461	464	GGAC	352_8846295	Download PWM	Download PFM
5.25665	0.81	EIF4B	417	420	GGAC	352_8846295	Download PWM	Download PFM
5.25665	0.81	EIF4B	963	966	GGAC	352_8846295	Download PWM	Download PFM
5.22923	0.81	Vts1	1263	1269	GCAGGGC	1176_19561594	Download PWM	Download PFM
5.22923	0.81	Vts1	78	84	GCAGGGC	1176_19561594	Download PWM	Download PFM
5.19994	0.81	Vts1	1420	1426	GCUGGAG	1176_19561594	Download PWM	Download PFM
5.19994	0.81	Vts1	864	870	GCUGGAG	1176_19561594	Download PWM	Download PFM
5.17797	0.83	YTHDC1	349	354	GCAUCC	969_20167602	Download PWM	Download PFM
5.11052	1	SFRS13A	106	112	AAAGAAC	1169_19561594	Download PWM	Download PFM
5.11052	1	SFRS13A	2055	2061	AAAGAAC	1169_19561594	Download PWM	Download PFM
5.09234	0.8	YBX1	641	646	ACUGCG	1177_19561594	Download PWM	Download PFM
5.02352	0.8	YTHDC1	640	645	UACUGC	969_20167602	Download PWM	Download PFM
5.00861	0.8	YTHDC1	1562	1567	GAGUCC	969_20167602	Download PWM	Download PFM
5.00861	0.8	YTHDC1	1252	1257	GAGUCC	969_20167602	Download PWM	Download PFM
4.99862	0.94	RBMX	367	370	CCAU	922_19282290	Download PWM	Download PFM
4.99862	0.94	RBMX	1290	1293	CCAU	922_19282290	Download PWM	Download PFM
4.99862	0.94	RBMX	2075	2078	CCAU	922_19282290	Download PWM	Download PFM
4.99862	0.94	RBMX	2164	2167	CCAU	922_19282290	Download PWM	Download PFM
4.99862	0.94	RBMX	453	456	CCAU	922_19282290	Download PWM	Download PFM
4.99862	0.94	RBMX	2017	2020	CCAU	922_19282290	Download PWM	Download PFM
4.93943	0.96	SFRS13A	1734	1740	AAAGGCC	1169_19561594	Download PWM	Download PFM
4.84133	1	RBM4	1034	1037	CGCG	1172_19561594	Download PWM	Download PFM
4.84133	1	RBM4	21	24	CGCG	1172_19561594	Download PWM	Download PFM
4.84133	1	RBM4	564	567	CGCG	1172_19561594	Download PWM	Download PFM
4.84133	1	RBM4	420	423	CGCG	1172_19561594	Download PWM	Download PFM
4.84133	1	RBM4	125	128	CGCG	1172_19561594	Download PWM	Download PFM
4.84133	1	RBM4	1066	1069	CGCG	1172_19561594	Download PWM	Download PFM
4.84133	1	RBM4	434	437	CGCG	1172_19561594	Download PWM	Download PFM
4.77427	0.93	SFRS13A	1374	1380	AAAGAGG	1169_19561594	Download PWM	Download PFM
4.66672	0.88	RBMX	1085	1088	CCAC	922_19282290	Download PWM	Download PFM
4.66672	0.88	RBMX	1511	1514	CCAC	922_19282290	Download PWM	Download PFM
4.66672	0.88	RBMX	1478	1481	CCAC	922_19282290	Download PWM	Download PFM
4.66672	0.88	RBMX	1071	1074	CCAC	922_19282290	Download PWM	Download PFM
4.66672	0.88	RBMX	740	743	CCAC	922_19282290	Download PWM	Download PFM
4.66672	0.88	RBMX	851	854	CCAC	922_19282290	Download PWM	Download PFM
4.66672	0.88	RBMX	1310	1313	CCAC	922_19282290	Download PWM	Download PFM
4.66672	0.88	RBMX	1470	1473	CCAC	922_19282290	Download PWM	Download PFM
4.66672	0.88	RBMX	1766	1769	CCAC	922_19282290	Download PWM	Download PFM
4.66672	0.88	RBMX	1450	1453	CCAC	922_19282290	Download PWM	Download PFM
4.66672	0.88	RBMX	353	356	CCAC	922_19282290	Download PWM	Download PFM
4.66672	0.88	RBMX	29	32	CCAC	922_19282290	Download PWM	Download PFM
4.66672	0.88	RBMX	1307	1310	CCAC	922_19282290	Download PWM	Download PFM
4.66672	0.88	RBMX	1428	1431	CCAC	922_19282290	Download PWM	Download PFM
4.66544	0.91	SFRS13A	1394	1400	AAAGGUC	1169_19561594	Download PWM	Download PFM
4.62029	1	SFRS1	653	656	AGGA	1173_19561594	Download PWM	Download PFM
4.62029	1	SFRS1	962	965	AGGA	1173_19561594	Download PWM	Download PFM
4.62029	1	SFRS1	1295	1298	AGGA	1173_19561594	Download PWM	Download PFM
4.62029	1	SFRS1	650	653	AGGA	1173_19561594	Download PWM	Download PFM
4.62029	1	SFRS1	1820	1823	AGGA	1173_19561594	Download PWM	Download PFM
4.62029	1	SFRS1	891	894	AGGA	1173_19561594	Download PWM	Download PFM
4.62029	1	SFRS1	482	485	AGGA	1173_19561594	Download PWM	Download PFM
4.62029	1	SFRS1	1669	1672	AGGA	1173_19561594	Download PWM	Download PFM
4.62029	1	SFRS1	598	601	AGGA	1173_19561594	Download PWM	Download PFM
4.62029	1	SFRS1	1796	1799	AGGA	1173_19561594	Download PWM	Download PFM
4.62029	1	SFRS1	1622	1625	AGGA	1173_19561594	Download PWM	Download PFM
4.62029	1	SFRS1	1331	1334	AGGA	1173_19561594	Download PWM	Download PFM
4.62029	1	SFRS1	710	713	AGGA	1173_19561594	Download PWM	Download PFM
4.62029	1	SFRS1	1900	1903	AGGA	1173_19561594	Download PWM	Download PFM
4.62029	1	SFRS1	1106	1109	AGGA	1173_19561594	Download PWM	Download PFM
4.62029	1	SFRS1	1346	1349	AGGA	1173_19561594	Download PWM	Download PFM
4.62029	1	SFRS1	416	419	AGGA	1173_19561594	Download PWM	Download PFM
4.62029	1	SFRS1	1328	1331	AGGA	1173_19561594	Download PWM	Download PFM
4.62029	1	SFRS1	1890	1893	AGGA	1173_19561594	Download PWM	Download PFM
4.62029	1	SFRS1	1520	1523	AGGA	1173_19561594	Download PWM	Download PFM
4.62029	1	SFRS1	1666	1669	AGGA	1173_19561594	Download PWM	Download PFM
4.604	0.98	KHDRBS3	2018	2023	CAUAAU	1174_19561594	Download PWM	Download PFM
4.56783	0.89	SFRS13A	498	504	AAAGGCU	1169_19561594	Download PWM	Download PFM
4.5139	0.88	SFRS13A	1818	1824	AGAGGAC	1169_19561594	Download PWM	Download PFM
4.42055	0.95	KHDRBS3	2259	2264	CCUAAU	1174_19561594	Download PWM	Download PFM
4.40359	1	ELAVL1	2146	2149	GUUU	1170_19561594	Download PWM	Download PFM
4.40359	1	ELAVL1	2314	2317	GUUU	1170_19561594	Download PWM	Download PFM
4.40359	1	ELAVL1	2116	2119	GUUU	1170_19561594	Download PWM	Download PFM
4.40359	1	ELAVL1	145	148	GUUU	1170_19561594	Download PWM	Download PFM
4.40359	1	ELAVL1	2193	2196	GUUU	1170_19561594	Download PWM	Download PFM
4.40359	1	ELAVL1	1363	1366	GUUU	1170_19561594	Download PWM	Download PFM
4.40359	1	ELAVL1	911	914	GUUU	1170_19561594	Download PWM	Download PFM
4.40359	1	ELAVL1	1952	1955	GUUU	1170_19561594	Download PWM	Download PFM
4.40271	0.83	RBMX	1260	1263	CCCG	922_19282290	Download PWM	Download PFM
4.40271	0.83	RBMX	1064	1067	CCCG	922_19282290	Download PWM	Download PFM
4.40271	0.83	RBMX	1060	1063	CCCG	922_19282290	Download PWM	Download PFM
4.40271	0.83	RBMX	1053	1056	CCCG	922_19282290	Download PWM	Download PFM
4.40271	0.83	RBMX	744	747	CCCG	922_19282290	Download PWM	Download PFM
4.40271	0.83	RBMX	1273	1276	CCCG	922_19282290	Download PWM	Download PFM
4.40271	0.83	RBMX	470	473	CCCG	922_19282290	Download PWM	Download PFM
4.40271	0.83	RBMX	41	44	CCCG	922_19282290	Download PWM	Download PFM
4.40271	0.83	RBMX	311	314	CCCG	922_19282290	Download PWM	Download PFM
4.40271	0.83	RBMX	408	411	CCCG	922_19282290	Download PWM	Download PFM
4.40271	0.83	RBMX	924	927	CCCG	922_19282290	Download PWM	Download PFM
4.40271	0.83	RBMX	696	699	CCCG	922_19282290	Download PWM	Download PFM
4.40271	0.83	RBMX	562	565	CCCG	922_19282290	Download PWM	Download PFM
4.40271	0.83	RBMX	486	489	CCCG	922_19282290	Download PWM	Download PFM
4.40271	0.83	RBMX	1713	1716	CCCG	922_19282290	Download PWM	Download PFM
4.40271	0.83	RBMX	429	432	CCCG	922_19282290	Download PWM	Download PFM
4.40271	0.83	RBMX	5	8	CCCG	922_19282290	Download PWM	Download PFM
4.38061	0.85	SFRS13A	1039	1045	AAAGACA	1169_19561594	Download PWM	Download PFM
4.3708	0.93	KHDRBS3	2182	2187	UUUAAU	1174_19561594	Download PWM	Download PFM
4.32559	0.92	KHDRBS3	2326	2331	AAUAAA	1174_19561594	Download PWM	Download PFM
4.32559	0.92	KHDRBS3	2185	2190	AAUAAA	1174_19561594	Download PWM	Download PFM
4.31683	0.84	SFRS13A	2007	2013	AAAGAUU	1169_19561594	Download PWM	Download PFM
4.27749	0.91	KHDRBS3	2051	2056	CAUAAA	1174_19561594	Download PWM	Download PFM
4.27749	0.91	KHDRBS3	2252	2257	UAUAAA	1174_19561594	Download PWM	Download PFM
4.27749	0.91	KHDRBS3	134	139	UAUAAA	1174_19561594	Download PWM	Download PFM
4.22907	0.82	SFRS13A	1008	1014	AGAGAAG	1169_19561594	Download PWM	Download PFM
4.21373	0.82	SFRS13A	414	420	CAAGGAC	1169_19561594	Download PWM	Download PFM
4.20608	0.82	SFRS13A	1664	1670	AGAGGAG	1169_19561594	Download PWM	Download PFM
4.20608	0.82	SFRS13A	1794	1800	AGAGGAG	1169_19561594	Download PWM	Download PFM
4.20071	0.9	KHDRBS3	173	178	AGUAAU	1174_19561594	Download PWM	Download PFM
4.18818	0.9	SFRS1	527	530	UGGA	1173_19561594	Download PWM	Download PFM
4.18818	0.9	SFRS1	1422	1425	UGGA	1173_19561594	Download PWM	Download PFM
4.18818	0.9	SFRS1	1407	1410	UGGA	1173_19561594	Download PWM	Download PFM
4.18818	0.9	SFRS1	1655	1658	UGGA	1173_19561594	Download PWM	Download PFM
4.18818	0.9	SFRS1	1721	1724	UGGA	1173_19561594	Download PWM	Download PFM
4.18818	0.9	SFRS1	973	976	UGGA	1173_19561594	Download PWM	Download PFM
4.18818	0.9	SFRS1	1550	1553	UGGA	1173_19561594	Download PWM	Download PFM
4.18818	0.9	SFRS1	718	721	UGGA	1173_19561594	Download PWM	Download PFM
4.18818	0.9	SFRS1	394	397	UGGA	1173_19561594	Download PWM	Download PFM
4.18818	0.9	SFRS1	866	869	UGGA	1173_19561594	Download PWM	Download PFM
4.18818	0.9	SFRS1	545	548	UGGA	1173_19561594	Download PWM	Download PFM
4.18818	0.9	SFRS1	221	224	UGGA	1173_19561594	Download PWM	Download PFM
4.18818	0.9	SFRS1	2040	2043	UGGA	1173_19561594	Download PWM	Download PFM
4.18818	0.9	SFRS1	1370	1373	UGGA	1173_19561594	Download PWM	Download PFM
4.11387	0.8	SFRS13A	1538	1544	AGAGGGU	1169_19561594	Download PWM	Download PFM
4.09239	0.87	KHDRBS3	2166	2171	AUUAAA	1174_19561594	Download PWM	Download PFM
4.0443	0.86	KHDRBS3	1756	1761	CUUAAA	1174_19561594	Download PWM	Download PFM
4.0443	0.86	KHDRBS3	2291	2296	UUUAAA	1174_19561594	Download PWM	Download PFM
4.0443	0.86	KHDRBS3	2119	2124	UUUAAA	1174_19561594	Download PWM	Download PFM
4.02073	0.86	KHDRBS3	2331	2336	AAUAAC	1174_19561594	Download PWM	Download PFM
4.02073	0.86	KHDRBS3	2176	2181	AAUAAC	1174_19561594	Download PWM	Download PFM
3.93933	0.84	KHDRBS3	1677	1682	GCUAAA	1174_19561594	Download PWM	Download PFM
3.82636	0.86	ELAVL1	2135	2138	AUUU	1170_19561594	Download PWM	Download PFM
3.82636	0.86	ELAVL1	2282	2285	AUUU	1170_19561594	Download PWM	Download PFM
3.82636	0.86	ELAVL1	530	533	AUUU	1170_19561594	Download PWM	Download PFM
3.82636	0.86	ELAVL1	2213	2216	AUUU	1170_19561594	Download PWM	Download PFM
3.82636	0.86	ELAVL1	1810	1813	AUUU	1170_19561594	Download PWM	Download PFM
3.82636	0.86	ELAVL1	2263	2266	AUUU	1170_19561594	Download PWM	Download PFM
3.82636	0.86	ELAVL1	2105	2108	AUUU	1170_19561594	Download PWM	Download PFM
3.82636	0.86	ELAVL1	2127	2130	AUUU	1170_19561594	Download PWM	Download PFM
3.82636	0.86	ELAVL1	455	458	AUUU	1170_19561594	Download PWM	Download PFM
3.82636	0.86	ELAVL1	635	638	AUUU	1170_19561594	Download PWM	Download PFM
3.82636	0.86	ELAVL1	2011	2014	AUUU	1170_19561594	Download PWM	Download PFM
3.82636	0.86	ELAVL1	2301	2304	AUUU	1170_19561594	Download PWM	Download PFM
3.82636	0.86	ELAVL1	2099	2102	AUUU	1170_19561594	Download PWM	Download PFM
3.82636	0.86	ELAVL1	2272	2275	AUUU	1170_19561594	Download PWM	Download PFM
3.82612	0.82	KHDRBS3	2023	2028	UGUAAA	1174_19561594	Download PWM	Download PFM
3.82612	0.82	KHDRBS3	2172	2177	UGUAAA	1174_19561594	Download PWM	Download PFM
3.82612	0.82	KHDRBS3	2153	2158	UGUAAA	1174_19561594	Download PWM	Download PFM
3.7892	0.81	KHDRBS3	1915	1920	UCUAAC	1174_19561594	Download PWM	Download PFM
3.7892	0.81	KHDRBS3	160	165	UCUAAC	1174_19561594	Download PWM	Download PFM
3.73944	0.8	KHDRBS3	2091	2096	UUUAAC	1174_19561594	Download PWM	Download PFM

## Sheet: myc 202
myc 202
1 CUGCUCGCGG CCGCCACCGC CGGGCCCCGG CCGUCCCUGG CUCCCCUCCU GCCUCGAGAA GGGCAGGGCU UCUCAGAGGC UUGGCGGGAA AAAGAACGGA
101 GGGAGGGAUC GCGCUGAGUA UAAAAGCCGG UUUUCGGGGC UUUAUCUAAC UCGCUGUAGU AAUUCCAGCG AGAGGCAGAG GGAGCGAGCG GGCGGCCGGC
201 UAGGGUGGAA GAGCCGGGCG AGCAGAGCUG CGCUGCGGGC GUCCUGGGAA GGGAGAUCCG GAGCGAAUAG GGGGCUUCGC CUCUGGCCCA GCCCUCCCGC
301 UGAUCCCCCA GCCAGCGGUC CGCAACCCUU GCCGCAUCCA CGAAACUUUG CCCAUAGCAG CGGGCGGGCA CUUUGCACUG GAACUUACAA CACCCGAGCA
401 AGGACGCGAC UCUCCCGACG CGGGGAGGCU AUUCUGCCCA UUUGGGGACA CUUCCCCGCC GCUGCCAGGA CCCGCUUCUC UGAAAGGCUC UCCUUGCAGC
501 UGCUUAGACG CUGGAUUUUU UUCGGGUAGU GGAAAACCAG CAGCCUCCCG CGACGAUGCC CCUCAACGUU AGCUUCACCA ACAGGAACUA UGACCUCGAC
601 UACGACUCGG UGCAGCCGUA UUUCUACUGC GACGAGGAGG AGAACUUCUA CCAGCAGCAG CAGCAGAGCG AGCUGCAGCC CCCGGCGCCC AGCGAGGAUA
701 UCUGGAAGAA AUUCGAGCUG CUGCCCACCC CGCCCCUGUC CCCUAGCCGC CGCUCCGGGC UCUGCUCGCC CUCCUACGUU GCGGUCACAC CCUUCUCCCU
801 UCGGGGAGAC AACGACGGCG GUGGCGGGAG CUUCUCCACG GCCGACCAGC UGGAGAUGGU GACCGAGCUG CUGGGAGGAG ACAUGGUGAA CCAGAGUUUC
901 AUCUGCGACC CGGACGACGA GACCUUCAUC AAAAACAUCA UCAUCCAGGA CUGUAUGUGG AGCGGCUUCU CGGCCGCCGC CAAGCUCGUC UCAGAGAAGC
1001 UGGCCUCCUA CCAGGCUGCG CGCAAAGACA GCGGCAGCCC GAACCCCGCC CGCGGCCACA GCGUCUGCUC CACCUCCAGC UUGUACCUGC AGGAUCUGAG
1101 CGCCGCCGCC UCAGAGUGCA UCGACCCCUC GGUGGUCUUC CCCUACCCUC UCAACGACAG CAGCUCGCCC AAGUCCUGCG CCUCGCAAGA CUCCAGCGCC
1201 UUCUCUCCGU CCUCGGAUUC UCUGCUCUCC UCGACGGAGU CCUCCCCGCA GGGCAGCCCC GAGCCCCUGG UGCUCCAUGA GGAGACACCG CCCACCACCA
1301 GCAGCGACUC UGAGGAGGAA CAAGAAGAUG AGGAAGAAAU CGAUGUUGUU UCUGUGGAAA AGAGGCAGGC UCCUGGCAAA AGGUCAGAGU CUGGAUCACC
1401 UUCUGCUGGA GGCCACAGCA AACCUCCUCA CAGCCCACUG GUCCUCAAGA GGUGCCACGU CUCCACACAU CAGCACAACU ACGCAGCGCC UCCCUCCACU
1501 CGGAAGGACU AUCCUGCUGC CAAGAGGGUC AAGUUGGACA GUGUCAGAGU CCUGAGACAG AUCAGCAACA ACCGAAAAUG CACCAGCCCC AGGUCCUCGG
1601 ACACCGAGGA GAAUGUCAAG AGGCGAACAC ACAACGUCUU GGAGCGCCAG AGGAGGAACG AGCUAAAACG GAGCUUUUUU GCCCUGCGUG ACCAGAUCCC
1701 GGAGUUGGAA AACAAUGAAA AGGCCCCCAA GGUAGUUAUC CUUAAAAAAG CCACAGCAUA CAUCCUGUCC GUCCAAGCAG AGGAGCAAAA GCUCAUUUCU
1801 GAAGAGGACU UGUUGCGGAA ACGACGAGAA CAGUUGAAAC ACAAACUUGA ACAGCUACGG AACUCUUGUG CGUAAGGAAA AGUAAGGAAA ACGAUUCCUU
1901 CUAACAGAAA UGUCCUGAGC AAUCACCUAU GAACUUGUUU CAAAUGCAUG AUCAAAUGCA ACCUCACAAC CUUGGCUGAG UCUUGAGACU GAAAGAUUUA
2001 GCCAUAAUGU AAACUGCCUC AAAUUGGACU UUGGGCAUAA AAGAACUUUU UUAUGCUUAC CAUCUUUUUU UUUUCUUUAA CAGAUUUGUA UUUAAGAAUU
2101 GUUUUUAAAA AAUUUUAAGA UUUACACAAU GUUUCUCUGU AAAUAUUGCC AUUAAAUGUA AAUAACUUUA AUAAAACGUU UAUAGCAGUU ACACAGAAUU
2201 UCAAUCCUAG UAUAUAGUAC CUAGUAUUAU AGGUACUAUA AACCCUAAUU UUUUUUAUUU AAGUACAUUU UGCUUUUUAA AGUUGAUUUU UUUCUAUUGU
2301 UUUUAGAAAA AAUAAAAUAA CUGGCAAAUA UAUCAUUGAG CCAAAUCUUA A
Score	Relative Score	RBP Name	Start	End	Matching sequence	Matrix ID	Download PWM	Download PFM
17.1026	0.82	pum	2155	2170	AAUGUAAAUAACUUUA	323_16537387	Download PWM	Download PFM
13.3659	0.95	ELAVL2	2253	2261	UUUUAUUUA	783_7972035	Download PWM	Download PFM
12.3119	0.81	SFRS7	807	816	AGACAACGAC	790_10094314	Download PWM	Download PFM
12.0085	0.87	ZFP36	2255	2263	UUAUUUAAG	951_12324455	Download PWM	Download PFM
11.0709	1	A2BP1	1945	1950	UGCAUG	37_16537540	Download PWM	Download PFM
10.8718	0.88	SFRS2	1776	1784	AGCAGAGGA	953_7543047	Download PWM	Download PFM
10.584	0.87	SNRPA	372	379	UUUGCACU	661_1717938	Download PWM	Download PFM
10.1697	0.88	SFRS1	1502	1509	GGAAGGAC	242_7543047	Download PWM	Download PFM
9.60877	0.97	HNRNPA1	201	206	UAGGGU	23_7510636	Download PWM	Download PFM
9.53976	0.83	SFRS1	57	64	AGAAGGGC	242_7543047	Download PWM	Download PFM
9.43168	1	EIF4B	1704	1710	GUUGGAA	350_8846295	Download PWM	Download PFM
9.42814	1	ybx2-a	934	939	AACAUC	114_7499328	Download PWM	Download PFM
9.37415	1	ybx2-a	934	939	AACAUC	115_7499328	Download PWM	Download PFM
9.29692	0.81	SFRS1	207	214	GGAAGAGC	242_7543047	Download PWM	Download PFM
8.94849	1	NONO	179	183	AGGGA	488_9001221	Download PWM	Download PFM
8.94849	1	NONO	100	104	AGGGA	488_9001221	Download PWM	Download PFM
8.94849	1	NONO	250	254	AGGGA	488_9001221	Download PWM	Download PFM
8.94849	1	NONO	104	108	AGGGA	488_9001221	Download PWM	Download PFM
8.884	0.87	SNRPA	851	857	UGGAGAU	949_10094314	Download PWM	Download PFM
8.71782	1	PABPC1	1744	1748	AAAAA	24_7908267	Download PWM	Download PFM
8.71782	1	PABPC1	931	935	AAAAA	24_7908267	Download PWM	Download PFM
8.71782	1	PABPC1	2308	2312	AAAAA	24_7908267	Download PWM	Download PFM
8.71782	1	PABPC1	2107	2111	AAAAA	24_7908267	Download PWM	Download PFM
8.71782	1	PABPC1	2307	2311	AAAAA	24_7908267	Download PWM	Download PFM
8.71782	1	PABPC1	1745	1749	AAAAA	24_7908267	Download PWM	Download PFM
8.71782	1	PABPC1	2108	2112	AAAAA	24_7908267	Download PWM	Download PFM
8.71782	1	PABPC1	89	93	AAAAA	24_7908267	Download PWM	Download PFM
8.6696	1	RBMY1A1	1444	1448	CUCAA	1053_17318228	Download PWM	Download PFM
8.6696	1	RBMY1A1	1150	1154	CUCAA	1053_17318228	Download PWM	Download PFM
8.6696	1	RBMY1A1	2018	2022	CUCAA	1053_17318228	Download PWM	Download PFM
8.6696	1	RBMY1A1	562	566	CUCAA	1053_17318228	Download PWM	Download PFM
8.6471	1	a2bp1	1946	1950	GCAUG	36_12574126	Download PWM	Download PFM
8.62722	1	RBMY1A1	1444	1448	CUCAA	1052_17318228	Download PWM	Download PFM
8.62722	1	RBMY1A1	1150	1154	CUCAA	1052_17318228	Download PWM	Download PFM
8.62722	1	RBMY1A1	2018	2022	CUCAA	1052_17318228	Download PWM	Download PFM
8.62722	1	RBMY1A1	562	566	CUCAA	1052_17318228	Download PWM	Download PFM
8.36291	0.91	EIF4B	84	90	GCGGGAA	351_8846295	Download PWM	Download PFM
8.08803	0.85	EIF4B	1533	1539	GUUGGAC	350_8846295	Download PWM	Download PFM
8.04688	0.88	EIF4B	1815	1821	GCGGAAA	351_8846295	Download PWM	Download PFM
7.89298	0.84	ybx2-a	389	394	AACACC	115_7499328	Download PWM	Download PFM
7.74698	0.96	SNRPA	372	378	UUUGCAC	1175_19561594	Download PWM	Download PFM
7.65634	0.88	RBMY1A1	1474	1478	CACAA	1052_17318228	Download PWM	Download PFM
7.65634	0.88	RBMY1A1	1965	1969	CACAA	1052_17318228	Download PWM	Download PFM
7.65634	0.88	RBMY1A1	1840	1844	CACAA	1052_17318228	Download PWM	Download PFM
7.65634	0.88	RBMY1A1	2125	2129	CACAA	1052_17318228	Download PWM	Download PFM
7.65634	0.88	RBMY1A1	1630	1634	CACAA	1052_17318228	Download PWM	Download PFM
7.56224	0.86	sap-49	1686	1691	GCGUGA	145_9163526	Download PWM	Download PFM
7.36938	1	FUS	1451	1454	GGUG	637_11098054	Download PWM	Download PFM
7.36938	1	FUS	204	207	GGUG	637_11098054	Download PWM	Download PFM
7.36938	1	FUS	885	888	GGUG	637_11098054	Download PWM	Download PFM
7.36938	1	FUS	1131	1134	GGUG	637_11098054	Download PWM	Download PFM
7.36938	1	FUS	1269	1272	GGUG	637_11098054	Download PWM	Download PFM
7.36938	1	FUS	820	823	GGUG	637_11098054	Download PWM	Download PFM
7.36938	1	FUS	609	612	GGUG	637_11098054	Download PWM	Download PFM
7.36938	1	FUS	858	861	GGUG	637_11098054	Download PWM	Download PFM
7.22942	1	Pum2	2087	2090	UGUA	329_11780640	Download PWM	Download PFM
7.22942	1	Pum2	952	955	UGUA	329_11780640	Download PWM	Download PFM
7.22942	1	Pum2	155	158	UGUA	329_11780640	Download PWM	Download PFM
7.22942	1	Pum2	2138	2141	UGUA	329_11780640	Download PWM	Download PFM
7.22942	1	Pum2	2157	2160	UGUA	329_11780640	Download PWM	Download PFM
7.22942	1	Pum2	1082	1085	UGUA	329_11780640	Download PWM	Download PFM
7.22942	1	Pum2	2008	2011	UGUA	329_11780640	Download PWM	Download PFM
7.08652	1	SFRS9	1505	1509	AGGAC	797_17548433	Download PWM	Download PFM
7.08652	1	SFRS9	401	405	AGGAC	797_17548433	Download PWM	Download PFM
7.08652	1	SFRS9	947	951	AGGAC	797_17548433	Download PWM	Download PFM
7.08652	1	SFRS9	1805	1809	AGGAC	797_17548433	Download PWM	Download PFM
7.08652	1	SFRS9	467	471	AGGAC	797_17548433	Download PWM	Download PFM
6.83499	0.8	PTBP1	2042	2056	AGAACUUUUUUAUGC	1171_19561594	Download PWM	Download PFM
6.63255	0.93	SFRS9	876	880	AGGAG	797_17548433	Download PWM	Download PFM
6.63255	0.93	SFRS9	1607	1611	AGGAG	797_17548433	Download PWM	Download PFM
6.63255	0.93	SFRS9	1781	1785	AGGAG	797_17548433	Download PWM	Download PFM
6.63255	0.93	SFRS9	635	639	AGGAG	797_17548433	Download PWM	Download PFM
6.63255	0.93	SFRS9	1651	1655	AGGAG	797_17548433	Download PWM	Download PFM
6.63255	0.93	SFRS9	1313	1317	AGGAG	797_17548433	Download PWM	Download PFM
6.63255	0.93	SFRS9	638	642	AGGAG	797_17548433	Download PWM	Download PFM
6.63255	0.93	SFRS9	1280	1284	AGGAG	797_17548433	Download PWM	Download PFM
6.62799	1	MBNL1	2	5	UGCU	669_20071745	Download PWM	Download PFM
6.62799	1	MBNL1	2271	2274	UGCU	669_20071745	Download PWM	Download PFM
6.62799	1	MBNL1	1515	1518	UGCU	669_20071745	Download PWM	Download PFM
6.62799	1	MBNL1	1223	1226	UGCU	669_20071745	Download PWM	Download PFM
6.62799	1	MBNL1	763	766	UGCU	669_20071745	Download PWM	Download PFM
6.62799	1	MBNL1	1066	1069	UGCU	669_20071745	Download PWM	Download PFM
6.62799	1	MBNL1	1271	1274	UGCU	669_20071745	Download PWM	Download PFM
6.62799	1	MBNL1	719	722	UGCU	669_20071745	Download PWM	Download PFM
6.62799	1	MBNL1	869	872	UGCU	669_20071745	Download PWM	Download PFM
6.62799	1	MBNL1	501	504	UGCU	669_20071745	Download PWM	Download PFM
6.62799	1	MBNL1	1404	1407	UGCU	669_20071745	Download PWM	Download PFM
6.62799	1	MBNL1	2054	2057	UGCU	669_20071745	Download PWM	Download PFM
6.56698	0.89	ACO1	1539	1544	CAGUGU	1213_8021254	Download PWM	Download PFM
6.46684	1	EIF4B	1817	1820	GGAA	352_8846295	Download PWM	Download PFM
6.46684	1	EIF4B	247	250	GGAA	352_8846295	Download PWM	Download PFM
6.46684	1	EIF4B	1332	1335	GGAA	352_8846295	Download PWM	Download PFM
6.46684	1	EIF4B	1317	1320	GGAA	352_8846295	Download PWM	Download PFM
6.46684	1	EIF4B	1655	1658	GGAA	352_8846295	Download PWM	Download PFM
6.46684	1	EIF4B	1356	1359	GGAA	352_8846295	Download PWM	Download PFM
6.46684	1	EIF4B	1707	1710	GGAA	352_8846295	Download PWM	Download PFM
6.46684	1	EIF4B	87	90	GGAA	352_8846295	Download PWM	Download PFM
6.46684	1	EIF4B	1886	1889	GGAA	352_8846295	Download PWM	Download PFM
6.46684	1	EIF4B	1502	1505	GGAA	352_8846295	Download PWM	Download PFM
6.46684	1	EIF4B	584	587	GGAA	352_8846295	Download PWM	Download PFM
6.46684	1	EIF4B	1876	1879	GGAA	352_8846295	Download PWM	Download PFM
6.46684	1	EIF4B	531	534	GGAA	352_8846295	Download PWM	Download PFM
6.46684	1	EIF4B	207	210	GGAA	352_8846295	Download PWM	Download PFM
6.46684	1	EIF4B	380	383	GGAA	352_8846295	Download PWM	Download PFM
6.46684	1	EIF4B	1859	1862	GGAA	352_8846295	Download PWM	Download PFM
6.46684	1	EIF4B	704	707	GGAA	352_8846295	Download PWM	Download PFM
6.33985	1	KHSRP	1173	1176	GUCC	1186_17893325	Download PWM	Download PFM
6.33985	1	KHSRP	318	321	GUCC	1186_17893325	Download PWM	Download PFM
6.33985	1	KHSRP	33	36	GUCC	1186_17893325	Download PWM	Download PFM
6.33985	1	KHSRP	1767	1770	GUCC	1186_17893325	Download PWM	Download PFM
6.33985	1	KHSRP	1593	1596	GUCC	1186_17893325	Download PWM	Download PFM
6.33985	1	KHSRP	1771	1774	GUCC	1186_17893325	Download PWM	Download PFM
6.33985	1	KHSRP	1441	1444	GUCC	1186_17893325	Download PWM	Download PFM
6.33985	1	KHSRP	1912	1915	GUCC	1186_17893325	Download PWM	Download PFM
6.33985	1	KHSRP	1209	1212	GUCC	1186_17893325	Download PWM	Download PFM
6.33985	1	KHSRP	1239	1242	GUCC	1186_17893325	Download PWM	Download PFM
6.33985	1	KHSRP	241	244	GUCC	1186_17893325	Download PWM	Download PFM
6.33985	1	KHSRP	738	741	GUCC	1186_17893325	Download PWM	Download PFM
6.33985	1	KHSRP	1549	1552	GUCC	1186_17893325	Download PWM	Download PFM
6.33891	1	YBX1	1175	1180	CCUGCG	1177_19561594	Download PWM	Download PFM
6.33891	1	YBX1	1683	1688	CCUGCG	1177_19561594	Download PWM	Download PFM
6.30299	0.98	Vts1	999	1005	GCUGGCC	1176_19561594	Download PWM	Download PFM
6.17832	0.93	MBNL1	509	512	CGCU	669_20071745	Download PWM	Download PFM
6.17832	0.93	MBNL1	473	476	CGCU	669_20071745	Download PWM	Download PFM
6.17832	0.93	MBNL1	112	115	CGCU	669_20071745	Download PWM	Download PFM
6.17832	0.93	MBNL1	152	155	CGCU	669_20071745	Download PWM	Download PFM
6.17832	0.93	MBNL1	231	234	CGCU	669_20071745	Download PWM	Download PFM
6.17832	0.93	MBNL1	460	463	CGCU	669_20071745	Download PWM	Download PFM
6.17832	0.93	MBNL1	298	301	CGCU	669_20071745	Download PWM	Download PFM
6.17832	0.93	MBNL1	751	754	CGCU	669_20071745	Download PWM	Download PFM
6.15803	0.96	Vts1	188	194	GCGGGCG	1176_19561594	Download PWM	Download PFM
6.15803	0.96	Vts1	360	366	GCGGGCG	1176_19561594	Download PWM	Download PFM
6.15803	0.96	Vts1	235	241	GCGGGCG	1176_19561594	Download PWM	Download PFM
5.94112	0.93	YBX1	902	907	UCUGCG	1177_19561594	Download PWM	Download PFM
5.88424	0.94	YTHDC1	1756	1761	GCAUAC	969_20167602	Download PWM	Download PFM
5.83627	0.91	Vts1	364	370	GCGGGCA	1176_19561594	Download PWM	Download PFM
5.83023	0.82	SFRS9	1472	1476	AGCAC	797_17548433	Download PWM	Download PFM
5.8261	0.91	YBX1	227	232	GCUGCG	1177_19561594	Download PWM	Download PFM
5.8261	0.91	YBX1	1015	1020	GCUGCG	1177_19561594	Download PWM	Download PFM
5.8261	0.91	YBX1	232	237	GCUGCG	1177_19561594	Download PWM	Download PFM
5.71488	0.91	YTHDC1	1114	1119	GAGUGC	969_20167602	Download PWM	Download PFM
5.60359	0.87	Vts1	1365	1371	GCAGGCU	1176_19561594	Download PWM	Download PFM
5.45962	0.87	YTHDC1	2215	2220	UAGUAC	969_20167602	Download PWM	Download PFM
5.3062	0.82	Vts1	824	830	GCGGGAG	1176_19561594	Download PWM	Download PFM
5.27878	0.84	YTHDC1	598	603	GACUAC	969_20167602	Download PWM	Download PFM
5.26826	1	RBMX	312	315	CCAG	922_19282290	Download PWM	Download PFM
5.26826	1	RBMX	537	540	CCAG	922_19282290	Download PWM	Download PFM
5.26826	1	RBMX	308	311	CCAG	922_19282290	Download PWM	Download PFM
5.26826	1	RBMX	891	894	CCAG	922_19282290	Download PWM	Download PFM
5.26826	1	RBMX	846	849	CCAG	922_19282290	Download PWM	Download PFM
5.26826	1	RBMX	1589	1592	CCAG	922_19282290	Download PWM	Download PFM
5.26826	1	RBMX	651	654	CCAG	922_19282290	Download PWM	Download PFM
5.26826	1	RBMX	945	948	CCAG	922_19282290	Download PWM	Download PFM
5.26826	1	RBMX	465	468	CCAG	922_19282290	Download PWM	Download PFM
5.26826	1	RBMX	1298	1301	CCAG	922_19282290	Download PWM	Download PFM
5.26826	1	RBMX	165	168	CCAG	922_19282290	Download PWM	Download PFM
5.26826	1	RBMX	1647	1650	CCAG	922_19282290	Download PWM	Download PFM
5.26826	1	RBMX	288	291	CCAG	922_19282290	Download PWM	Download PFM
5.26826	1	RBMX	1583	1586	CCAG	922_19282290	Download PWM	Download PFM
5.26826	1	RBMX	1076	1079	CCAG	922_19282290	Download PWM	Download PFM
5.26826	1	RBMX	689	692	CCAG	922_19282290	Download PWM	Download PFM
5.26826	1	RBMX	1011	1014	CCAG	922_19282290	Download PWM	Download PFM
5.26826	1	RBMX	1193	1196	CCAG	922_19282290	Download PWM	Download PFM
5.26826	1	RBMX	1692	1695	CCAG	922_19282290	Download PWM	Download PFM
5.25665	0.81	EIF4B	468	471	GGAC	352_8846295	Download PWM	Download PFM
5.25665	0.81	EIF4B	1536	1539	GGAC	352_8846295	Download PWM	Download PFM
5.25665	0.81	EIF4B	1806	1809	GGAC	352_8846295	Download PWM	Download PFM
5.25665	0.81	EIF4B	912	915	GGAC	352_8846295	Download PWM	Download PFM
5.25665	0.81	EIF4B	2026	2029	GGAC	352_8846295	Download PWM	Download PFM
5.25665	0.81	EIF4B	402	405	GGAC	352_8846295	Download PWM	Download PFM
5.25665	0.81	EIF4B	446	449	GGAC	352_8846295	Download PWM	Download PFM
5.25665	0.81	EIF4B	948	951	GGAC	352_8846295	Download PWM	Download PFM
5.25665	0.81	EIF4B	1599	1602	GGAC	352_8846295	Download PWM	Download PFM
5.25665	0.81	EIF4B	1506	1509	GGAC	352_8846295	Download PWM	Download PFM
5.22923	0.81	Vts1	1248	1254	GCAGGGC	1176_19561594	Download PWM	Download PFM
5.22923	0.81	Vts1	63	69	GCAGGGC	1176_19561594	Download PWM	Download PFM
5.19994	0.81	Vts1	1405	1411	GCUGGAG	1176_19561594	Download PWM	Download PFM
5.19994	0.81	Vts1	849	855	GCUGGAG	1176_19561594	Download PWM	Download PFM
5.17797	0.83	YTHDC1	334	339	GCAUCC	969_20167602	Download PWM	Download PFM
5.11052	1	SFRS13A	91	97	AAAGAAC	1169_19561594	Download PWM	Download PFM
5.11052	1	SFRS13A	2040	2046	AAAGAAC	1169_19561594	Download PWM	Download PFM
5.09234	0.8	YBX1	626	631	ACUGCG	1177_19561594	Download PWM	Download PFM
5.02352	0.8	YTHDC1	625	630	UACUGC	969_20167602	Download PWM	Download PFM
5.00861	0.8	YTHDC1	1547	1552	GAGUCC	969_20167602	Download PWM	Download PFM
5.00861	0.8	YTHDC1	1237	1242	GAGUCC	969_20167602	Download PWM	Download PFM
4.99862	0.94	RBMX	2060	2063	CCAU	922_19282290	Download PWM	Download PFM
4.99862	0.94	RBMX	352	355	CCAU	922_19282290	Download PWM	Download PFM
4.99862	0.94	RBMX	2002	2005	CCAU	922_19282290	Download PWM	Download PFM
4.99862	0.94	RBMX	1275	1278	CCAU	922_19282290	Download PWM	Download PFM
4.99862	0.94	RBMX	2149	2152	CCAU	922_19282290	Download PWM	Download PFM
4.99862	0.94	RBMX	438	441	CCAU	922_19282290	Download PWM	Download PFM
4.93943	0.96	SFRS13A	1719	1725	AAAGGCC	1169_19561594	Download PWM	Download PFM
4.84133	1	RBM4	6	9	CGCG	1172_19561594	Download PWM	Download PFM
4.84133	1	RBM4	1019	1022	CGCG	1172_19561594	Download PWM	Download PFM
4.84133	1	RBM4	110	113	CGCG	1172_19561594	Download PWM	Download PFM
4.84133	1	RBM4	1051	1054	CGCG	1172_19561594	Download PWM	Download PFM
4.84133	1	RBM4	405	408	CGCG	1172_19561594	Download PWM	Download PFM
4.84133	1	RBM4	549	552	CGCG	1172_19561594	Download PWM	Download PFM
4.84133	1	RBM4	419	422	CGCG	1172_19561594	Download PWM	Download PFM
4.77427	0.93	SFRS13A	1359	1365	AAAGAGG	1169_19561594	Download PWM	Download PFM
4.66672	0.88	RBMX	1295	1298	CCAC	922_19282290	Download PWM	Download PFM
4.66672	0.88	RBMX	1455	1458	CCAC	922_19282290	Download PWM	Download PFM
4.66672	0.88	RBMX	1463	1466	CCAC	922_19282290	Download PWM	Download PFM
4.66672	0.88	RBMX	1292	1295	CCAC	922_19282290	Download PWM	Download PFM
4.66672	0.88	RBMX	14	17	CCAC	922_19282290	Download PWM	Download PFM
4.66672	0.88	RBMX	836	839	CCAC	922_19282290	Download PWM	Download PFM
4.66672	0.88	RBMX	1413	1416	CCAC	922_19282290	Download PWM	Download PFM
4.66672	0.88	RBMX	1056	1059	CCAC	922_19282290	Download PWM	Download PFM
4.66672	0.88	RBMX	338	341	CCAC	922_19282290	Download PWM	Download PFM
4.66672	0.88	RBMX	725	728	CCAC	922_19282290	Download PWM	Download PFM
4.66672	0.88	RBMX	1496	1499	CCAC	922_19282290	Download PWM	Download PFM
4.66672	0.88	RBMX	1435	1438	CCAC	922_19282290	Download PWM	Download PFM
4.66672	0.88	RBMX	1070	1073	CCAC	922_19282290	Download PWM	Download PFM
4.66672	0.88	RBMX	1751	1754	CCAC	922_19282290	Download PWM	Download PFM
4.66544	0.91	SFRS13A	1379	1385	AAAGGUC	1169_19561594	Download PWM	Download PFM
4.62029	1	SFRS1	1654	1657	AGGA	1173_19561594	Download PWM	Download PFM
4.62029	1	SFRS1	876	879	AGGA	1173_19561594	Download PWM	Download PFM
4.62029	1	SFRS1	1505	1508	AGGA	1173_19561594	Download PWM	Download PFM
4.62029	1	SFRS1	1331	1334	AGGA	1173_19561594	Download PWM	Download PFM
4.62029	1	SFRS1	1607	1610	AGGA	1173_19561594	Download PWM	Download PFM
4.62029	1	SFRS1	1781	1784	AGGA	1173_19561594	Download PWM	Download PFM
4.62029	1	SFRS1	635	638	AGGA	1173_19561594	Download PWM	Download PFM
4.62029	1	SFRS1	1316	1319	AGGA	1173_19561594	Download PWM	Download PFM
4.62029	1	SFRS1	401	404	AGGA	1173_19561594	Download PWM	Download PFM
4.62029	1	SFRS1	1875	1878	AGGA	1173_19561594	Download PWM	Download PFM
4.62029	1	SFRS1	947	950	AGGA	1173_19561594	Download PWM	Download PFM
4.62029	1	SFRS1	1651	1654	AGGA	1173_19561594	Download PWM	Download PFM
4.62029	1	SFRS1	1313	1316	AGGA	1173_19561594	Download PWM	Download PFM
4.62029	1	SFRS1	1091	1094	AGGA	1173_19561594	Download PWM	Download PFM
4.62029	1	SFRS1	638	641	AGGA	1173_19561594	Download PWM	Download PFM
4.62029	1	SFRS1	1280	1283	AGGA	1173_19561594	Download PWM	Download PFM
4.62029	1	SFRS1	695	698	AGGA	1173_19561594	Download PWM	Download PFM
4.62029	1	SFRS1	583	586	AGGA	1173_19561594	Download PWM	Download PFM
4.62029	1	SFRS1	1885	1888	AGGA	1173_19561594	Download PWM	Download PFM
4.62029	1	SFRS1	1805	1808	AGGA	1173_19561594	Download PWM	Download PFM
4.62029	1	SFRS1	467	470	AGGA	1173_19561594	Download PWM	Download PFM
4.604	0.98	KHDRBS3	2003	2008	CAUAAU	1174_19561594	Download PWM	Download PFM
4.56783	0.89	SFRS13A	483	489	AAAGGCU	1169_19561594	Download PWM	Download PFM
4.5139	0.88	SFRS13A	1803	1809	AGAGGAC	1169_19561594	Download PWM	Download PFM
4.42055	0.95	KHDRBS3	2244	2249	CCUAAU	1174_19561594	Download PWM	Download PFM
4.40359	1	ELAVL1	2131	2134	GUUU	1170_19561594	Download PWM	Download PFM
4.40359	1	ELAVL1	1348	1351	GUUU	1170_19561594	Download PWM	Download PFM
4.40359	1	ELAVL1	130	133	GUUU	1170_19561594	Download PWM	Download PFM
4.40359	1	ELAVL1	896	899	GUUU	1170_19561594	Download PWM	Download PFM
4.40359	1	ELAVL1	2101	2104	GUUU	1170_19561594	Download PWM	Download PFM
4.40359	1	ELAVL1	1937	1940	GUUU	1170_19561594	Download PWM	Download PFM
4.40359	1	ELAVL1	2178	2181	GUUU	1170_19561594	Download PWM	Download PFM
4.40359	1	ELAVL1	2299	2302	GUUU	1170_19561594	Download PWM	Download PFM
4.40271	0.83	RBMX	729	732	CCCG	922_19282290	Download PWM	Download PFM
4.40271	0.83	RBMX	1245	1248	CCCG	922_19282290	Download PWM	Download PFM
4.40271	0.83	RBMX	414	417	CCCG	922_19282290	Download PWM	Download PFM
4.40271	0.83	RBMX	1045	1048	CCCG	922_19282290	Download PWM	Download PFM
4.40271	0.83	RBMX	26	29	CCCG	922_19282290	Download PWM	Download PFM
4.40271	0.83	RBMX	547	550	CCCG	922_19282290	Download PWM	Download PFM
4.40271	0.83	RBMX	909	912	CCCG	922_19282290	Download PWM	Download PFM
4.40271	0.83	RBMX	1258	1261	CCCG	922_19282290	Download PWM	Download PFM
4.40271	0.83	RBMX	393	396	CCCG	922_19282290	Download PWM	Download PFM
4.40271	0.83	RBMX	1698	1701	CCCG	922_19282290	Download PWM	Download PFM
4.40271	0.83	RBMX	1038	1041	CCCG	922_19282290	Download PWM	Download PFM
4.40271	0.83	RBMX	681	684	CCCG	922_19282290	Download PWM	Download PFM
4.40271	0.83	RBMX	455	458	CCCG	922_19282290	Download PWM	Download PFM
4.40271	0.83	RBMX	1049	1052	CCCG	922_19282290	Download PWM	Download PFM
4.40271	0.83	RBMX	471	474	CCCG	922_19282290	Download PWM	Download PFM
4.40271	0.83	RBMX	296	299	CCCG	922_19282290	Download PWM	Download PFM
4.38061	0.85	SFRS13A	1024	1030	AAAGACA	1169_19561594	Download PWM	Download PFM
4.3708	0.93	KHDRBS3	2167	2172	UUUAAU	1174_19561594	Download PWM	Download PFM
4.32559	0.92	KHDRBS3	2170	2175	AAUAAA	1174_19561594	Download PWM	Download PFM
4.32559	0.92	KHDRBS3	2311	2316	AAUAAA	1174_19561594	Download PWM	Download PFM
4.31683	0.84	SFRS13A	1992	1998	AAAGAUU	1169_19561594	Download PWM	Download PFM
4.27749	0.91	KHDRBS3	2237	2242	UAUAAA	1174_19561594	Download PWM	Download PFM
4.27749	0.91	KHDRBS3	119	124	UAUAAA	1174_19561594	Download PWM	Download PFM
4.27749	0.91	KHDRBS3	2036	2041	CAUAAA	1174_19561594	Download PWM	Download PFM
4.22907	0.82	SFRS13A	993	999	AGAGAAG	1169_19561594	Download PWM	Download PFM
4.21373	0.82	SFRS13A	399	405	CAAGGAC	1169_19561594	Download PWM	Download PFM
4.20608	0.82	SFRS13A	1649	1655	AGAGGAG	1169_19561594	Download PWM	Download PFM
4.20608	0.82	SFRS13A	1779	1785	AGAGGAG	1169_19561594	Download PWM	Download PFM
4.20071	0.9	KHDRBS3	158	163	AGUAAU	1174_19561594	Download PWM	Download PFM
4.18818	0.9	SFRS1	1355	1358	UGGA	1173_19561594	Download PWM	Download PFM
4.18818	0.9	SFRS1	2025	2028	UGGA	1173_19561594	Download PWM	Download PFM
4.18818	0.9	SFRS1	530	533	UGGA	1173_19561594	Download PWM	Download PFM
4.18818	0.9	SFRS1	1407	1410	UGGA	1173_19561594	Download PWM	Download PFM
4.18818	0.9	SFRS1	851	854	UGGA	1173_19561594	Download PWM	Download PFM
4.18818	0.9	SFRS1	512	515	UGGA	1173_19561594	Download PWM	Download PFM
4.18818	0.9	SFRS1	958	961	UGGA	1173_19561594	Download PWM	Download PFM
4.18818	0.9	SFRS1	379	382	UGGA	1173_19561594	Download PWM	Download PFM
4.18818	0.9	SFRS1	206	209	UGGA	1173_19561594	Download PWM	Download PFM
4.18818	0.9	SFRS1	1392	1395	UGGA	1173_19561594	Download PWM	Download PFM
4.18818	0.9	SFRS1	1706	1709	UGGA	1173_19561594	Download PWM	Download PFM
4.18818	0.9	SFRS1	703	706	UGGA	1173_19561594	Download PWM	Download PFM
4.18818	0.9	SFRS1	1640	1643	UGGA	1173_19561594	Download PWM	Download PFM
4.18818	0.9	SFRS1	1535	1538	UGGA	1173_19561594	Download PWM	Download PFM
4.11387	0.8	SFRS13A	1523	1529	AGAGGGU	1169_19561594	Download PWM	Download PFM
4.09239	0.87	KHDRBS3	2151	2156	AUUAAA	1174_19561594	Download PWM	Download PFM
4.0443	0.86	KHDRBS3	2104	2109	UUUAAA	1174_19561594	Download PWM	Download PFM
4.0443	0.86	KHDRBS3	1741	1746	CUUAAA	1174_19561594	Download PWM	Download PFM
4.0443	0.86	KHDRBS3	2276	2281	UUUAAA	1174_19561594	Download PWM	Download PFM
4.02073	0.86	KHDRBS3	2161	2166	AAUAAC	1174_19561594	Download PWM	Download PFM
4.02073	0.86	KHDRBS3	2316	2321	AAUAAC	1174_19561594	Download PWM	Download PFM
3.93933	0.84	KHDRBS3	1662	1667	GCUAAA	1174_19561594	Download PWM	Download PFM
3.82636	0.86	ELAVL1	2267	2270	AUUU	1170_19561594	Download PWM	Download PFM
3.82636	0.86	ELAVL1	2286	2289	AUUU	1170_19561594	Download PWM	Download PFM
3.82636	0.86	ELAVL1	2120	2123	AUUU	1170_19561594	Download PWM	Download PFM
3.82636	0.86	ELAVL1	440	443	AUUU	1170_19561594	Download PWM	Download PFM
3.82636	0.86	ELAVL1	1996	1999	AUUU	1170_19561594	Download PWM	Download PFM
3.82636	0.86	ELAVL1	620	623	AUUU	1170_19561594	Download PWM	Download PFM
3.82636	0.86	ELAVL1	2084	2087	AUUU	1170_19561594	Download PWM	Download PFM
3.82636	0.86	ELAVL1	2248	2251	AUUU	1170_19561594	Download PWM	Download PFM
3.82636	0.86	ELAVL1	515	518	AUUU	1170_19561594	Download PWM	Download PFM
3.82636	0.86	ELAVL1	2198	2201	AUUU	1170_19561594	Download PWM	Download PFM
3.82636	0.86	ELAVL1	2090	2093	AUUU	1170_19561594	Download PWM	Download PFM
3.82636	0.86	ELAVL1	2257	2260	AUUU	1170_19561594	Download PWM	Download PFM
3.82636	0.86	ELAVL1	2112	2115	AUUU	1170_19561594	Download PWM	Download PFM
3.82636	0.86	ELAVL1	1795	1798	AUUU	1170_19561594	Download PWM	Download PFM
3.82612	0.82	KHDRBS3	2138	2143	UGUAAA	1174_19561594	Download PWM	Download PFM
3.82612	0.82	KHDRBS3	2157	2162	UGUAAA	1174_19561594	Download PWM	Download PFM
3.82612	0.82	KHDRBS3	2008	2013	UGUAAA	1174_19561594	Download PWM	Download PFM
3.7892	0.81	KHDRBS3	1900	1905	UCUAAC	1174_19561594	Download PWM	Download PFM
3.7892	0.81	KHDRBS3	145	150	UCUAAC	1174_19561594	Download PWM	Download PFM
3.73944	0.8	KHDRBS3	2076	2081	UUUAAC	1174_19561594	Download PWM	Download PFM

## Sheet: myc 205
myc 205
1 GGGCUUUAUC UAACUCGCUG UAGUAAUUCC AGCGAGAGGC AGAGGGAGCG AGCGGGCGGC CGGCUAGGGU GGAAGAGCCG GGCGAGCAGA GCUGCGCUGC
101 GGGCGUCCUG GGAAGGGAGA UCCGGAGCGA AUAGGGGGCU UCGCCUCUGG CCCAGCCCUC CCGCUGAUCC CCCAGCCAGC GGUCCGCAAC CCUUGCCGCA
201 UCCACGAAAC UUUGCCCAUA GCAGCGGGCG GGCACUUUGC ACUGGAACUU ACAACACCCG AGCAAGGACG CGACUCUCCC GACGCGGGGA GGCUAUUCUG
301 CCCAUUUGGG GACACUUCCC CGCCGCUGCC AGGACCCGCU UCUCUGAAAG GCUCUCCUUG CAGCUGCUUA GACGCUGGAU UUUUUUCGGG UAGUGGAAAA
401 CCAGCCUCCC GCGACGAUGC CCCUCAACGU UAGCUUCACC AACAGGAACU AUGACCUCGA CUACGACUCG GUGCAGCCGU AUUUCUACUG CGACGAGGAG
501 GAGAACUUCU ACCAGCAGCA GCAGCAGAGC GAGCUGCAGC CCCCGGCGCC CAGCGAGGAU AUCUGGAAGA AAUUCGAGCU GCUGCCCACC CCGCCCCUGU
601 CCCCUAGCCG CCGCUCCGGG CUCUGCUCGC CCUCCUACGU UGCGGUCACA CCCUUCUCCC UUCGGGGAGA CAACGACGGC GGUGGCGGGA GCUUCUCCAC
701 GGCCGACCAG CUGGAGAUGG UGACCGAGCU GCUGGGAGGA GACAUGGUGA ACCAGAGUUU CAUCUGCGAC CCGGACGACG AGACCUUCAU CAAAAACAUC
801 AUCAUCCAGG ACUGUAUGUG GAGCGGCUUC UCGGCCGCCG CCAAGCUCGU CUCAGAGAAG CUGGCCUCCU ACCAGGCUGC GCGCAAAGAC AGCGGCAGCC
901 CGAACCCCGC CCGCGGCCAC AGCGUCUGCU CCACCUCCAG CUUGUACCUG CAGGAUCUGA GCGCCGCCGC CUCAGAGUGC AUCGACCCCU CGGUGGUCUU
1001 CCCCUACCCU CUCAACGACA GCAGCUCGCC CAAGUCCUGC GCCUCGCAAG ACUCCAGCGC CUUCUCUCCG UCCUCGGAUU CUCUGCUCUC CUCGACGGAG
1101 UCCUCCCCGC AGGGCAGCCC CGAGCCCCUG GUGCUCCAUG AGGAGACACC GCCCACCACC AGCAGCGACU CUGAGGAGGA ACAAGAAGAU GAGGAAGAAA
1201 UCGAUGUUGU UUCUGUGGAA AAGAGGCAGG CUCCUGGCAA AAGGUCAGAG UCUGGAUCAC CUUCUGCUGG AGGCCACAGC AAACCUCCUC ACAGCCCACU
1301 GGUCCUCAAG AGGUGCCACG UCUCCACACA UCAGCACAAC UACGCAGCGC CUCCCUCCAC UCGGAAGGAC UAUCCUGCUG CCAAGAGGGU CAAGUUGGAC
1401 AGUGUCAGAG UCCUGAGACA GAUCAGCAAC AACCGAAAAU GCACCAGCCC CAGGUCCUCG GACACCGAGG AGAAUGUCAA GAGGCGAACA CACAACGUCU
1501 UGGAGCGCCA GAGGAGGAAC GAGCUAAAAC GGAGCUUUUU UGCCCUGCGU GACCAGAUCC CGGAGUUGGA AAACAAUGAA AAGGCCCCCA AGGUAGUUAU
1601 CCUUAAAAAA GCCACAGCAU ACAUCCUGUC CGUCCAAGCA GAGGAGCAAA AGCUCAUUUC UGAAGAGGAC UUGUUGCGGA AACGACGAGA ACAGUUGAAA
1701 CACAAACUUG AACAGCUACG GAACUCUUGU GCGUAAGGAA AAGUAAGGAA AACGAUUCCU UCUAACAGAA AUGUCCUGAG CAAUCACCUA UGAACUUGUU
1801 UCAAAUGCAU GAUCAAAUGC AACCUCACAA CCUUGGCUGA GUCUUGAGAC UGAAAGAUUU AGCCAUAAUG UAAACUGCCU CAAAUUGGAC UUUGGGCAUA
1901 AAAGAACUUU UUUAUGCUUA CCAUCUUUUU UUUUUCUUUA ACAGAUUUGU AUUUAAGAAU UGUUUUUAAA AAAUUUUAAG AUUUACACAA UGUUUCUCUG
2001 UAAAUAUUGC CAUUAAAUGU AAAUAACUUU AAUAAAACGU UUAUAGCAGU UACACAGAAU UUCAAUCCUA GUAUAUAGUA CCUAGUAUUA UAGGUACUAU
2101 AAACCCUAAU UUUUUUUAUU UAAGUACAUU UUGCUUUUUA AAGUUGAUUU
Score	Relative Score	RBP Name	Start	End	Matching sequence	Matrix ID	Download PWM	Download PFM
17.1026	0.82	pum	2016	2031	AAUGUAAAUAACUUUA	323_16537387	Download PWM	Download PFM
13.3659	0.95	ELAVL2	2114	2122	UUUUAUUUA	783_7972035	Download PWM	Download PFM
12.3119	0.81	SFRS7	668	677	AGACAACGAC	790_10094314	Download PWM	Download PFM
12.0085	0.87	ZFP36	2116	2124	UUAUUUAAG	951_12324455	Download PWM	Download PFM
11.0709	1	A2BP1	1806	1811	UGCAUG	37_16537540	Download PWM	Download PFM
10.8718	0.88	SFRS2	1637	1645	AGCAGAGGA	953_7543047	Download PWM	Download PFM
10.584	0.87	SNRPA	236	243	UUUGCACU	661_1717938	Download PWM	Download PFM
10.1697	0.88	SFRS1	1363	1370	GGAAGGAC	242_7543047	Download PWM	Download PFM
9.60877	0.97	HNRNPA1	65	70	UAGGGU	23_7510636	Download PWM	Download PFM
9.43168	1	EIF4B	1565	1571	GUUGGAA	350_8846295	Download PWM	Download PFM
9.42814	1	ybx2-a	795	800	AACAUC	114_7499328	Download PWM	Download PFM
9.37415	1	ybx2-a	795	800	AACAUC	115_7499328	Download PWM	Download PFM
9.29692	0.81	SFRS1	71	78	GGAAGAGC	242_7543047	Download PWM	Download PFM
8.94849	1	NONO	114	118	AGGGA	488_9001221	Download PWM	Download PFM
8.94849	1	NONO	43	47	AGGGA	488_9001221	Download PWM	Download PFM
8.884	0.87	SNRPA	712	718	UGGAGAU	949_10094314	Download PWM	Download PFM
8.71782	1	PABPC1	1969	1973	AAAAA	24_7908267	Download PWM	Download PFM
8.71782	1	PABPC1	792	796	AAAAA	24_7908267	Download PWM	Download PFM
8.71782	1	PABPC1	1606	1610	AAAAA	24_7908267	Download PWM	Download PFM
8.71782	1	PABPC1	1968	1972	AAAAA	24_7908267	Download PWM	Download PFM
8.71782	1	PABPC1	1605	1609	AAAAA	24_7908267	Download PWM	Download PFM
8.6696	1	RBMY1A1	423	427	CUCAA	1053_17318228	Download PWM	Download PFM
8.6696	1	RBMY1A1	1305	1309	CUCAA	1053_17318228	Download PWM	Download PFM
8.6696	1	RBMY1A1	1879	1883	CUCAA	1053_17318228	Download PWM	Download PFM
8.6696	1	RBMY1A1	1011	1015	CUCAA	1053_17318228	Download PWM	Download PFM
8.6471	1	a2bp1	1807	1811	GCAUG	36_12574126	Download PWM	Download PFM
8.62722	1	RBMY1A1	423	427	CUCAA	1052_17318228	Download PWM	Download PFM
8.62722	1	RBMY1A1	1305	1309	CUCAA	1052_17318228	Download PWM	Download PFM
8.62722	1	RBMY1A1	1879	1883	CUCAA	1052_17318228	Download PWM	Download PFM
8.62722	1	RBMY1A1	1011	1015	CUCAA	1052_17318228	Download PWM	Download PFM
8.08803	0.85	EIF4B	1394	1400	GUUGGAC	350_8846295	Download PWM	Download PFM
8.04688	0.88	EIF4B	1676	1682	GCGGAAA	351_8846295	Download PWM	Download PFM
7.89298	0.84	ybx2-a	253	258	AACACC	115_7499328	Download PWM	Download PFM
7.74698	0.96	SNRPA	236	242	UUUGCAC	1175_19561594	Download PWM	Download PFM
7.65634	0.88	RBMY1A1	1491	1495	CACAA	1052_17318228	Download PWM	Download PFM
7.65634	0.88	RBMY1A1	1335	1339	CACAA	1052_17318228	Download PWM	Download PFM
7.65634	0.88	RBMY1A1	1826	1830	CACAA	1052_17318228	Download PWM	Download PFM
7.65634	0.88	RBMY1A1	1701	1705	CACAA	1052_17318228	Download PWM	Download PFM
7.65634	0.88	RBMY1A1	1986	1990	CACAA	1052_17318228	Download PWM	Download PFM
7.56224	0.86	sap-49	1547	1552	GCGUGA	145_9163526	Download PWM	Download PFM
7.36938	1	FUS	1130	1133	GGUG	637_11098054	Download PWM	Download PFM
7.36938	1	FUS	992	995	GGUG	637_11098054	Download PWM	Download PFM
7.36938	1	FUS	470	473	GGUG	637_11098054	Download PWM	Download PFM
7.36938	1	FUS	681	684	GGUG	637_11098054	Download PWM	Download PFM
7.36938	1	FUS	1312	1315	GGUG	637_11098054	Download PWM	Download PFM
7.36938	1	FUS	719	722	GGUG	637_11098054	Download PWM	Download PFM
7.36938	1	FUS	746	749	GGUG	637_11098054	Download PWM	Download PFM
7.36938	1	FUS	68	71	GGUG	637_11098054	Download PWM	Download PFM
7.22942	1	Pum2	1948	1951	UGUA	329_11780640	Download PWM	Download PFM
7.22942	1	Pum2	1999	2002	UGUA	329_11780640	Download PWM	Download PFM
7.22942	1	Pum2	19	22	UGUA	329_11780640	Download PWM	Download PFM
7.22942	1	Pum2	2018	2021	UGUA	329_11780640	Download PWM	Download PFM
7.22942	1	Pum2	1869	1872	UGUA	329_11780640	Download PWM	Download PFM
7.22942	1	Pum2	813	816	UGUA	329_11780640	Download PWM	Download PFM
7.22942	1	Pum2	943	946	UGUA	329_11780640	Download PWM	Download PFM
7.08652	1	SFRS9	331	335	AGGAC	797_17548433	Download PWM	Download PFM
7.08652	1	SFRS9	808	812	AGGAC	797_17548433	Download PWM	Download PFM
7.08652	1	SFRS9	265	269	AGGAC	797_17548433	Download PWM	Download PFM
7.08652	1	SFRS9	1366	1370	AGGAC	797_17548433	Download PWM	Download PFM
7.08652	1	SFRS9	1666	1670	AGGAC	797_17548433	Download PWM	Download PFM
6.83499	0.8	PTBP1	1903	1917	AGAACUUUUUUAUGC	1171_19561594	Download PWM	Download PFM
6.63255	0.93	SFRS9	496	500	AGGAG	797_17548433	Download PWM	Download PFM
6.63255	0.93	SFRS9	737	741	AGGAG	797_17548433	Download PWM	Download PFM
6.63255	0.93	SFRS9	1468	1472	AGGAG	797_17548433	Download PWM	Download PFM
6.63255	0.93	SFRS9	1174	1178	AGGAG	797_17548433	Download PWM	Download PFM
6.63255	0.93	SFRS9	499	503	AGGAG	797_17548433	Download PWM	Download PFM
6.63255	0.93	SFRS9	1642	1646	AGGAG	797_17548433	Download PWM	Download PFM
6.63255	0.93	SFRS9	1512	1516	AGGAG	797_17548433	Download PWM	Download PFM
6.63255	0.93	SFRS9	1141	1145	AGGAG	797_17548433	Download PWM	Download PFM
6.62799	1	MBNL1	1376	1379	UGCU	669_20071745	Download PWM	Download PFM
6.62799	1	MBNL1	730	733	UGCU	669_20071745	Download PWM	Download PFM
6.62799	1	MBNL1	927	930	UGCU	669_20071745	Download PWM	Download PFM
6.62799	1	MBNL1	1084	1087	UGCU	669_20071745	Download PWM	Download PFM
6.62799	1	MBNL1	1132	1135	UGCU	669_20071745	Download PWM	Download PFM
6.62799	1	MBNL1	624	627	UGCU	669_20071745	Download PWM	Download PFM
6.62799	1	MBNL1	1915	1918	UGCU	669_20071745	Download PWM	Download PFM
6.62799	1	MBNL1	365	368	UGCU	669_20071745	Download PWM	Download PFM
6.62799	1	MBNL1	580	583	UGCU	669_20071745	Download PWM	Download PFM
6.62799	1	MBNL1	2132	2135	UGCU	669_20071745	Download PWM	Download PFM
6.62799	1	MBNL1	1265	1268	UGCU	669_20071745	Download PWM	Download PFM
6.56698	0.89	ACO1	1400	1405	CAGUGU	1213_8021254	Download PWM	Download PFM
6.46684	1	EIF4B	1217	1220	GGAA	352_8846295	Download PWM	Download PFM
6.46684	1	EIF4B	445	448	GGAA	352_8846295	Download PWM	Download PFM
6.46684	1	EIF4B	1568	1571	GGAA	352_8846295	Download PWM	Download PFM
6.46684	1	EIF4B	244	247	GGAA	352_8846295	Download PWM	Download PFM
6.46684	1	EIF4B	1678	1681	GGAA	352_8846295	Download PWM	Download PFM
6.46684	1	EIF4B	111	114	GGAA	352_8846295	Download PWM	Download PFM
6.46684	1	EIF4B	1178	1181	GGAA	352_8846295	Download PWM	Download PFM
6.46684	1	EIF4B	565	568	GGAA	352_8846295	Download PWM	Download PFM
6.46684	1	EIF4B	1737	1740	GGAA	352_8846295	Download PWM	Download PFM
6.46684	1	EIF4B	1516	1519	GGAA	352_8846295	Download PWM	Download PFM
6.46684	1	EIF4B	1747	1750	GGAA	352_8846295	Download PWM	Download PFM
6.46684	1	EIF4B	1363	1366	GGAA	352_8846295	Download PWM	Download PFM
6.46684	1	EIF4B	395	398	GGAA	352_8846295	Download PWM	Download PFM
6.46684	1	EIF4B	1193	1196	GGAA	352_8846295	Download PWM	Download PFM
6.46684	1	EIF4B	71	74	GGAA	352_8846295	Download PWM	Download PFM
6.46684	1	EIF4B	1720	1723	GGAA	352_8846295	Download PWM	Download PFM
6.33985	1	KHSRP	1034	1037	GUCC	1186_17893325	Download PWM	Download PFM
6.33985	1	KHSRP	1628	1631	GUCC	1186_17893325	Download PWM	Download PFM
6.33985	1	KHSRP	182	185	GUCC	1186_17893325	Download PWM	Download PFM
6.33985	1	KHSRP	1302	1305	GUCC	1186_17893325	Download PWM	Download PFM
6.33985	1	KHSRP	1410	1413	GUCC	1186_17893325	Download PWM	Download PFM
6.33985	1	KHSRP	1454	1457	GUCC	1186_17893325	Download PWM	Download PFM
6.33985	1	KHSRP	599	602	GUCC	1186_17893325	Download PWM	Download PFM
6.33985	1	KHSRP	1773	1776	GUCC	1186_17893325	Download PWM	Download PFM
6.33985	1	KHSRP	1100	1103	GUCC	1186_17893325	Download PWM	Download PFM
6.33985	1	KHSRP	1070	1073	GUCC	1186_17893325	Download PWM	Download PFM
6.33985	1	KHSRP	105	108	GUCC	1186_17893325	Download PWM	Download PFM
6.33985	1	KHSRP	1632	1635	GUCC	1186_17893325	Download PWM	Download PFM
6.33891	1	YBX1	1544	1549	CCUGCG	1177_19561594	Download PWM	Download PFM
6.33891	1	YBX1	1036	1041	CCUGCG	1177_19561594	Download PWM	Download PFM
6.30299	0.98	Vts1	860	866	GCUGGCC	1176_19561594	Download PWM	Download PFM
6.17832	0.93	MBNL1	324	327	CGCU	669_20071745	Download PWM	Download PFM
6.17832	0.93	MBNL1	337	340	CGCU	669_20071745	Download PWM	Download PFM
6.17832	0.93	MBNL1	16	19	CGCU	669_20071745	Download PWM	Download PFM
6.17832	0.93	MBNL1	95	98	CGCU	669_20071745	Download PWM	Download PFM
6.17832	0.93	MBNL1	162	165	CGCU	669_20071745	Download PWM	Download PFM
6.17832	0.93	MBNL1	373	376	CGCU	669_20071745	Download PWM	Download PFM
6.17832	0.93	MBNL1	612	615	CGCU	669_20071745	Download PWM	Download PFM
6.15803	0.96	Vts1	52	58	GCGGGCG	1176_19561594	Download PWM	Download PFM
6.15803	0.96	Vts1	99	105	GCGGGCG	1176_19561594	Download PWM	Download PFM
6.15803	0.96	Vts1	224	230	GCGGGCG	1176_19561594	Download PWM	Download PFM
5.94112	0.93	YBX1	763	768	UCUGCG	1177_19561594	Download PWM	Download PFM
5.88424	0.94	YTHDC1	1617	1622	GCAUAC	969_20167602	Download PWM	Download PFM
5.83627	0.91	Vts1	228	234	GCGGGCA	1176_19561594	Download PWM	Download PFM
5.83023	0.82	SFRS9	1333	1337	AGCAC	797_17548433	Download PWM	Download PFM
5.8261	0.91	YBX1	876	881	GCUGCG	1177_19561594	Download PWM	Download PFM
5.8261	0.91	YBX1	91	96	GCUGCG	1177_19561594	Download PWM	Download PFM
5.8261	0.91	YBX1	96	101	GCUGCG	1177_19561594	Download PWM	Download PFM
5.71488	0.91	YTHDC1	975	980	GAGUGC	969_20167602	Download PWM	Download PFM
5.60359	0.87	Vts1	1226	1232	GCAGGCU	1176_19561594	Download PWM	Download PFM
5.45962	0.87	YTHDC1	2076	2081	UAGUAC	969_20167602	Download PWM	Download PFM
5.3062	0.82	Vts1	685	691	GCGGGAG	1176_19561594	Download PWM	Download PFM
5.27878	0.84	YTHDC1	459	464	GACUAC	969_20167602	Download PWM	Download PFM
5.26826	1	RBMX	176	179	CCAG	922_19282290	Download PWM	Download PFM
5.26826	1	RBMX	1444	1447	CCAG	922_19282290	Download PWM	Download PFM
5.26826	1	RBMX	1054	1057	CCAG	922_19282290	Download PWM	Download PFM
5.26826	1	RBMX	512	515	CCAG	922_19282290	Download PWM	Download PFM
5.26826	1	RBMX	1553	1556	CCAG	922_19282290	Download PWM	Download PFM
5.26826	1	RBMX	1159	1162	CCAG	922_19282290	Download PWM	Download PFM
5.26826	1	RBMX	707	710	CCAG	922_19282290	Download PWM	Download PFM
5.26826	1	RBMX	401	404	CCAG	922_19282290	Download PWM	Download PFM
5.26826	1	RBMX	152	155	CCAG	922_19282290	Download PWM	Download PFM
5.26826	1	RBMX	550	553	CCAG	922_19282290	Download PWM	Download PFM
5.26826	1	RBMX	937	940	CCAG	922_19282290	Download PWM	Download PFM
5.26826	1	RBMX	329	332	CCAG	922_19282290	Download PWM	Download PFM
5.26826	1	RBMX	1450	1453	CCAG	922_19282290	Download PWM	Download PFM
5.26826	1	RBMX	806	809	CCAG	922_19282290	Download PWM	Download PFM
5.26826	1	RBMX	172	175	CCAG	922_19282290	Download PWM	Download PFM
5.26826	1	RBMX	1508	1511	CCAG	922_19282290	Download PWM	Download PFM
5.26826	1	RBMX	752	755	CCAG	922_19282290	Download PWM	Download PFM
5.26826	1	RBMX	29	32	CCAG	922_19282290	Download PWM	Download PFM
5.26826	1	RBMX	872	875	CCAG	922_19282290	Download PWM	Download PFM
5.25665	0.81	EIF4B	1397	1400	GGAC	352_8846295	Download PWM	Download PFM
5.25665	0.81	EIF4B	1460	1463	GGAC	352_8846295	Download PWM	Download PFM
5.25665	0.81	EIF4B	809	812	GGAC	352_8846295	Download PWM	Download PFM
5.25665	0.81	EIF4B	773	776	GGAC	352_8846295	Download PWM	Download PFM
5.25665	0.81	EIF4B	1887	1890	GGAC	352_8846295	Download PWM	Download PFM
5.25665	0.81	EIF4B	310	313	GGAC	352_8846295	Download PWM	Download PFM
5.25665	0.81	EIF4B	1667	1670	GGAC	352_8846295	Download PWM	Download PFM
5.25665	0.81	EIF4B	332	335	GGAC	352_8846295	Download PWM	Download PFM
5.25665	0.81	EIF4B	266	269	GGAC	352_8846295	Download PWM	Download PFM
5.25665	0.81	EIF4B	1367	1370	GGAC	352_8846295	Download PWM	Download PFM
5.22923	0.81	Vts1	1109	1115	GCAGGGC	1176_19561594	Download PWM	Download PFM
5.19994	0.81	Vts1	710	716	GCUGGAG	1176_19561594	Download PWM	Download PFM
5.19994	0.81	Vts1	1266	1272	GCUGGAG	1176_19561594	Download PWM	Download PFM
5.17797	0.83	YTHDC1	198	203	GCAUCC	969_20167602	Download PWM	Download PFM
5.11052	1	SFRS13A	1901	1907	AAAGAAC	1169_19561594	Download PWM	Download PFM
5.09234	0.8	YBX1	487	492	ACUGCG	1177_19561594	Download PWM	Download PFM
5.02352	0.8	YTHDC1	486	491	UACUGC	969_20167602	Download PWM	Download PFM
5.00861	0.8	YTHDC1	1098	1103	GAGUCC	969_20167602	Download PWM	Download PFM
5.00861	0.8	YTHDC1	1408	1413	GAGUCC	969_20167602	Download PWM	Download PFM
4.99862	0.94	RBMX	1136	1139	CCAU	922_19282290	Download PWM	Download PFM
4.99862	0.94	RBMX	302	305	CCAU	922_19282290	Download PWM	Download PFM
4.99862	0.94	RBMX	2010	2013	CCAU	922_19282290	Download PWM	Download PFM
4.99862	0.94	RBMX	1863	1866	CCAU	922_19282290	Download PWM	Download PFM
4.99862	0.94	RBMX	1921	1924	CCAU	922_19282290	Download PWM	Download PFM
4.99862	0.94	RBMX	216	219	CCAU	922_19282290	Download PWM	Download PFM
4.93943	0.96	SFRS13A	1580	1586	AAAGGCC	1169_19561594	Download PWM	Download PFM
4.84133	1	RBM4	912	915	CGCG	1172_19561594	Download PWM	Download PFM
4.84133	1	RBM4	269	272	CGCG	1172_19561594	Download PWM	Download PFM
4.84133	1	RBM4	410	413	CGCG	1172_19561594	Download PWM	Download PFM
4.84133	1	RBM4	283	286	CGCG	1172_19561594	Download PWM	Download PFM
4.84133	1	RBM4	880	883	CGCG	1172_19561594	Download PWM	Download PFM
4.77427	0.93	SFRS13A	1220	1226	AAAGAGG	1169_19561594	Download PWM	Download PFM
4.66672	0.88	RBMX	1156	1159	CCAC	922_19282290	Download PWM	Download PFM
4.66672	0.88	RBMX	931	934	CCAC	922_19282290	Download PWM	Download PFM
4.66672	0.88	RBMX	697	700	CCAC	922_19282290	Download PWM	Download PFM
4.66672	0.88	RBMX	917	920	CCAC	922_19282290	Download PWM	Download PFM
4.66672	0.88	RBMX	1612	1615	CCAC	922_19282290	Download PWM	Download PFM
4.66672	0.88	RBMX	1274	1277	CCAC	922_19282290	Download PWM	Download PFM
4.66672	0.88	RBMX	1316	1319	CCAC	922_19282290	Download PWM	Download PFM
4.66672	0.88	RBMX	1357	1360	CCAC	922_19282290	Download PWM	Download PFM
4.66672	0.88	RBMX	1153	1156	CCAC	922_19282290	Download PWM	Download PFM
4.66672	0.88	RBMX	1296	1299	CCAC	922_19282290	Download PWM	Download PFM
4.66672	0.88	RBMX	586	589	CCAC	922_19282290	Download PWM	Download PFM
4.66672	0.88	RBMX	202	205	CCAC	922_19282290	Download PWM	Download PFM
4.66672	0.88	RBMX	1324	1327	CCAC	922_19282290	Download PWM	Download PFM
4.66544	0.91	SFRS13A	1240	1246	AAAGGUC	1169_19561594	Download PWM	Download PFM
4.62029	1	SFRS1	496	499	AGGA	1173_19561594	Download PWM	Download PFM
4.62029	1	SFRS1	331	334	AGGA	1173_19561594	Download PWM	Download PFM
4.62029	1	SFRS1	952	955	AGGA	1173_19561594	Download PWM	Download PFM
4.62029	1	SFRS1	737	740	AGGA	1173_19561594	Download PWM	Download PFM
4.62029	1	SFRS1	1468	1471	AGGA	1173_19561594	Download PWM	Download PFM
4.62029	1	SFRS1	1515	1518	AGGA	1173_19561594	Download PWM	Download PFM
4.62029	1	SFRS1	444	447	AGGA	1173_19561594	Download PWM	Download PFM
4.62029	1	SFRS1	1174	1177	AGGA	1173_19561594	Download PWM	Download PFM
4.62029	1	SFRS1	499	502	AGGA	1173_19561594	Download PWM	Download PFM
4.62029	1	SFRS1	556	559	AGGA	1173_19561594	Download PWM	Download PFM
4.62029	1	SFRS1	1642	1645	AGGA	1173_19561594	Download PWM	Download PFM
4.62029	1	SFRS1	808	811	AGGA	1173_19561594	Download PWM	Download PFM
4.62029	1	SFRS1	265	268	AGGA	1173_19561594	Download PWM	Download PFM
4.62029	1	SFRS1	1512	1515	AGGA	1173_19561594	Download PWM	Download PFM
4.62029	1	SFRS1	1192	1195	AGGA	1173_19561594	Download PWM	Download PFM
4.62029	1	SFRS1	1366	1369	AGGA	1173_19561594	Download PWM	Download PFM
4.62029	1	SFRS1	1141	1144	AGGA	1173_19561594	Download PWM	Download PFM
4.62029	1	SFRS1	1177	1180	AGGA	1173_19561594	Download PWM	Download PFM
4.62029	1	SFRS1	1736	1739	AGGA	1173_19561594	Download PWM	Download PFM
4.62029	1	SFRS1	1666	1669	AGGA	1173_19561594	Download PWM	Download PFM
4.62029	1	SFRS1	1746	1749	AGGA	1173_19561594	Download PWM	Download PFM
4.604	0.98	KHDRBS3	1864	1869	CAUAAU	1174_19561594	Download PWM	Download PFM
4.56783	0.89	SFRS13A	347	353	AAAGGCU	1169_19561594	Download PWM	Download PFM
4.5139	0.88	SFRS13A	1664	1670	AGAGGAC	1169_19561594	Download PWM	Download PFM
4.42055	0.95	KHDRBS3	2105	2110	CCUAAU	1174_19561594	Download PWM	Download PFM
4.40359	1	ELAVL1	1992	1995	GUUU	1170_19561594	Download PWM	Download PFM
4.40359	1	ELAVL1	757	760	GUUU	1170_19561594	Download PWM	Download PFM
4.40359	1	ELAVL1	2039	2042	GUUU	1170_19561594	Download PWM	Download PFM
4.40359	1	ELAVL1	1962	1965	GUUU	1170_19561594	Download PWM	Download PFM
4.40359	1	ELAVL1	1209	1212	GUUU	1170_19561594	Download PWM	Download PFM
4.40359	1	ELAVL1	1798	1801	GUUU	1170_19561594	Download PWM	Download PFM
4.40271	0.83	RBMX	1119	1122	CCCG	922_19282290	Download PWM	Download PFM
4.40271	0.83	RBMX	770	773	CCCG	922_19282290	Download PWM	Download PFM
4.40271	0.83	RBMX	335	338	CCCG	922_19282290	Download PWM	Download PFM
4.40271	0.83	RBMX	906	909	CCCG	922_19282290	Download PWM	Download PFM
4.40271	0.83	RBMX	408	411	CCCG	922_19282290	Download PWM	Download PFM
4.40271	0.83	RBMX	1106	1109	CCCG	922_19282290	Download PWM	Download PFM
4.40271	0.83	RBMX	910	913	CCCG	922_19282290	Download PWM	Download PFM
4.40271	0.83	RBMX	319	322	CCCG	922_19282290	Download PWM	Download PFM
4.40271	0.83	RBMX	899	902	CCCG	922_19282290	Download PWM	Download PFM
4.40271	0.83	RBMX	542	545	CCCG	922_19282290	Download PWM	Download PFM
4.40271	0.83	RBMX	257	260	CCCG	922_19282290	Download PWM	Download PFM
4.40271	0.83	RBMX	590	593	CCCG	922_19282290	Download PWM	Download PFM
4.40271	0.83	RBMX	1559	1562	CCCG	922_19282290	Download PWM	Download PFM
4.40271	0.83	RBMX	160	163	CCCG	922_19282290	Download PWM	Download PFM
4.40271	0.83	RBMX	278	281	CCCG	922_19282290	Download PWM	Download PFM
4.38061	0.85	SFRS13A	885	891	AAAGACA	1169_19561594	Download PWM	Download PFM
4.3708	0.93	KHDRBS3	2028	2033	UUUAAU	1174_19561594	Download PWM	Download PFM
4.32559	0.92	KHDRBS3	2031	2036	AAUAAA	1174_19561594	Download PWM	Download PFM
4.31683	0.84	SFRS13A	1853	1859	AAAGAUU	1169_19561594	Download PWM	Download PFM
4.27749	0.91	KHDRBS3	2098	2103	UAUAAA	1174_19561594	Download PWM	Download PFM
4.27749	0.91	KHDRBS3	1897	1902	CAUAAA	1174_19561594	Download PWM	Download PFM
4.22907	0.82	SFRS13A	854	860	AGAGAAG	1169_19561594	Download PWM	Download PFM
4.21373	0.82	SFRS13A	263	269	CAAGGAC	1169_19561594	Download PWM	Download PFM
4.20608	0.82	SFRS13A	1510	1516	AGAGGAG	1169_19561594	Download PWM	Download PFM
4.20608	0.82	SFRS13A	1640	1646	AGAGGAG	1169_19561594	Download PWM	Download PFM
4.20071	0.9	KHDRBS3	22	27	AGUAAU	1174_19561594	Download PWM	Download PFM
4.18818	0.9	SFRS1	376	379	UGGA	1173_19561594	Download PWM	Download PFM
4.18818	0.9	SFRS1	564	567	UGGA	1173_19561594	Download PWM	Download PFM
4.18818	0.9	SFRS1	712	715	UGGA	1173_19561594	Download PWM	Download PFM
4.18818	0.9	SFRS1	243	246	UGGA	1173_19561594	Download PWM	Download PFM
4.18818	0.9	SFRS1	1268	1271	UGGA	1173_19561594	Download PWM	Download PFM
4.18818	0.9	SFRS1	70	73	UGGA	1173_19561594	Download PWM	Download PFM
4.18818	0.9	SFRS1	1567	1570	UGGA	1173_19561594	Download PWM	Download PFM
4.18818	0.9	SFRS1	819	822	UGGA	1173_19561594	Download PWM	Download PFM
4.18818	0.9	SFRS1	1253	1256	UGGA	1173_19561594	Download PWM	Download PFM
4.18818	0.9	SFRS1	1886	1889	UGGA	1173_19561594	Download PWM	Download PFM
4.18818	0.9	SFRS1	394	397	UGGA	1173_19561594	Download PWM	Download PFM
4.18818	0.9	SFRS1	1216	1219	UGGA	1173_19561594	Download PWM	Download PFM
4.18818	0.9	SFRS1	1396	1399	UGGA	1173_19561594	Download PWM	Download PFM
4.18818	0.9	SFRS1	1501	1504	UGGA	1173_19561594	Download PWM	Download PFM
4.11387	0.8	SFRS13A	1384	1390	AGAGGGU	1169_19561594	Download PWM	Download PFM
4.09239	0.87	KHDRBS3	2012	2017	AUUAAA	1174_19561594	Download PWM	Download PFM
4.0443	0.86	KHDRBS3	1602	1607	CUUAAA	1174_19561594	Download PWM	Download PFM
4.0443	0.86	KHDRBS3	1965	1970	UUUAAA	1174_19561594	Download PWM	Download PFM
4.0443	0.86	KHDRBS3	2137	2142	UUUAAA	1174_19561594	Download PWM	Download PFM
4.02073	0.86	KHDRBS3	2022	2027	AAUAAC	1174_19561594	Download PWM	Download PFM
3.93933	0.84	KHDRBS3	1523	1528	GCUAAA	1174_19561594	Download PWM	Download PFM
3.82636	0.86	ELAVL1	2147	2150	AUUU	1170_19561594	Download PWM	Download PFM
3.82636	0.86	ELAVL1	2109	2112	AUUU	1170_19561594	Download PWM	Download PFM
3.82636	0.86	ELAVL1	1945	1948	AUUU	1170_19561594	Download PWM	Download PFM
3.82636	0.86	ELAVL1	1951	1954	AUUU	1170_19561594	Download PWM	Download PFM
3.82636	0.86	ELAVL1	1656	1659	AUUU	1170_19561594	Download PWM	Download PFM
3.82636	0.86	ELAVL1	1973	1976	AUUU	1170_19561594	Download PWM	Download PFM
3.82636	0.86	ELAVL1	2059	2062	AUUU	1170_19561594	Download PWM	Download PFM
3.82636	0.86	ELAVL1	379	382	AUUU	1170_19561594	Download PWM	Download PFM
3.82636	0.86	ELAVL1	481	484	AUUU	1170_19561594	Download PWM	Download PFM
3.82636	0.86	ELAVL1	304	307	AUUU	1170_19561594	Download PWM	Download PFM
3.82636	0.86	ELAVL1	2128	2131	AUUU	1170_19561594	Download PWM	Download PFM
3.82636	0.86	ELAVL1	2118	2121	AUUU	1170_19561594	Download PWM	Download PFM
3.82636	0.86	ELAVL1	1981	1984	AUUU	1170_19561594	Download PWM	Download PFM
3.82636	0.86	ELAVL1	1857	1860	AUUU	1170_19561594	Download PWM	Download PFM
3.82612	0.82	KHDRBS3	1999	2004	UGUAAA	1174_19561594	Download PWM	Download PFM
3.82612	0.82	KHDRBS3	2018	2023	UGUAAA	1174_19561594	Download PWM	Download PFM
3.82612	0.82	KHDRBS3	1869	1874	UGUAAA	1174_19561594	Download PWM	Download PFM
3.7892	0.81	KHDRBS3	9	14	UCUAAC	1174_19561594	Download PWM	Download PFM
3.7892	0.81	KHDRBS3	1761	1766	UCUAAC	1174_19561594	Download PWM	Download PFM
3.73944	0.8	KHDRBS3	1937	1942	UUUAAC	1174_19561594	Download PWM	Download PFM
KHDRBS3
KHDRBS3
KHDRBS3
KHDRBS3
ELAVL1
ELAVL1
ELAVL1
ELAVL1
ELAVL1
ELAVL1
ELAVL1
ELAVL1
ELAVL1
ELAVL1
ELAVL1
ELAVL1
ELAVL1
ELAVL1
KHDRBS3
KHDRBS3
KHDRBS3
KHDRBS3
KHDRBS3
KHDRBS3
