# Supplementary material for: Comprehensive in vivo identification of the c-Myc mRNA protein interactome using HyPR-MS
Source: RNA. 2019 Oct;25(10):1337–52. doi: 10.1261/rna.072157.119 (PMC6800478; doi:10.1261/rna.072157.119)
Supplement: Supplemental Material [file supp_072157.119_Supplemental_Table_S7.xlsx]

## Sheet: TABLE S7
TABLE S7 : predicted RBPs using RBPMAP software interacting with different c-Myc transcript splice variants captured by HyPR-MS. Those signed in yellow are found in c-myc enriched list.

## Sheet: myc-201
myc201
Predictions for sequence: sequence1
Calculation parameters:
Genome: Human (hg38)
Selected motifs: All Human/Mouse motifs
Stringency level: Medium
Conservation filter: Off
======================================================================================================================
Protein: A1CF(Hs/Mm)
Sequence Position Motif K-mer Z-score P-value
53 wuaauur uuauuuu 2.289 1.10e-02
58 wuaauur uuaauca 2.411 7.95e-03
61 wuaauur aucauuc 2.344 9.54e-03
418 wuaauur uuaauuc 1.722 4.25e-02
Protein: ANKHD1(Hs/Mm)
Sequence Position Motif K-mer Z-score P-value
384 agacgww agaggga 1.870 3.07e-02
1264 agacgww agccgua 1.652 4.93e-02
1562 agacgww ggacgac 2.478 6.61e-03
1565 agacgww cgacgag 2.507 6.09e-03
1570 agacgww agaccuu 2.725 3.22e-03
1971 agacgww agaagau 2.087 1.84e-02
Protein: BRUNOL4(Hs/Mm)
Sequence Position Motif K-mer Z-score P-value
1995 kgugukk uguuucu 2.297 1.08e-02
1999 kgugukk ucugugg 2.365 9.02e-03
Protein: BRUNOL5(Hs/Mm)
Sequence Position Motif K-mer Z-score P-value
1995 ugugukk uguuucu 1.950 2.56e-02
1999 ugugukk ucugugg 1.938 2.63e-02
Protein: BRUNOL6(Hs/Mm)
Sequence Position Motif K-mer Z-score P-value
274 ugugdkg ggugugg 2.347 9.46e-03
276 ugugdkg uguggag 2.493 6.33e-03
1999 ugugdkg ucugugg 1.800 3.59e-02
Protein: CPEB2(Hs/Mm)
Sequence Position Motif K-mer Z-score P-value
53 chuuuuu uuauuuu 2.041 2.06e-02
75 chuuuuu cguuuuc 2.102 1.78e-02
1164 chuuuuu gauuuuu 2.673 3.76e-03
1165 chuuuuu auuuuuu 2.796 2.59e-03
1166 chuuuuu uuuuuuu 2.837 2.28e-03
1167 chuuuuu uuuuuuc 2.439 7.36e-03
Protein: CPEB4(Hs/Mm)
Sequence Position Motif K-mer Z-score P-value
54 uuuuuu uauuuu 2.374 8.80e-03
55 uuuuuu auuuua 2.252 1.22e-02
75 uuuuuu cguuuu 2.426 7.63e-03
76 uuuuuu guuuuc 2.252 1.22e-02
1164 uuuuuu gauuuu 2.713 3.33e-03
1165 uuuuuu auuuuu 3.165 7.75e-04
1166 uuuuuu uuuuuu 3.183 7.29e-04
1167 uuuuuu uuuuuu 3.183 7.29e-04
1168 uuuuuu uuuuuc 2.617 4.44e-03
Protein: CUG-BP(Hs/Mm)
Sequence Position Motif K-mer Z-score P-value
46 ugcug ugcug 1.929 2.69e-02
327 ugcug ugcgg 2.000 2.27e-02
344 ugcug uacug 2.000 2.27e-02
347 ugcug ugcua 2.000 2.27e-02
464 ugcug ugcuc 2.035 2.09e-02
469 ugcug ggcug 2.000 2.27e-02
477 ugcug ggcug 1.965 2.47e-02
629 ugcug ggcug 2.575 5.01e-03
632 ugcug ugagg 1.761 3.91e-02
644 ugcug agcug 2.584 4.88e-03
649 ugcug ugcug 3.018 1.27e-03
652 ugcug ugcuc 2.575 5.01e-03
656 ugcug cgcgg 1.690 4.55e-02
659 ugcug ggccg 1.673 4.72e-02
668 ugcug cgccg 1.699 4.47e-02
876 ugcug agcug 2.133 1.65e-02
881 ugcug cgcug 2.115 1.72e-02
884 ugcug ugcgg 2.133 1.65e-02
892 ugcug uccug 2.115 1.72e-02
1145 ugcug ugcag 2.142 1.61e-02
1148 ugcug agcug 2.150 1.58e-02
1151 ugcug ugcuu 2.142 1.61e-02
1159 ugcug cgcug 2.133 1.65e-02
1261 ugcug ugcag 1.743 4.07e-02
1275 ugcug uacug 1.779 3.76e-02
1321 ugcug agcug 1.779 3.76e-02
1324 ugcug ugcag 1.743 4.07e-02
1366 ugcug agcug 2.097 1.80e-02
1369 ugcug ugcug 2.540 5.54e-03
1413 ugcug ugcuc 1.814 3.48e-02
1430 ugcug ugcgg 1.805 3.55e-02
1498 ugcug agcug 2.593 4.76e-03
1501 ugcug uggag 1.761 3.91e-02
1504 ugcug agaug 1.761 3.91e-02
1507 ugcug uggug 2.575 5.01e-03
1516 ugcug agcug 2.611 4.51e-03
1519 ugcug ugcug 3.053 1.13e-03
1534 ugcug uggug 2.319 1.02e-02
1648 ugcug agcug 1.743 4.07e-02
1664 ugcug ggcug 1.743 4.07e-02
1716 ugcug ugcuc 1.779 3.76e-02
1738 ugcug ugcag 1.814 3.48e-02
1918 ugcug uggug 1.743 4.07e-02
1921 ugcug ugcuc 1.743 4.07e-02
1992 ugcug uguug 1.814 3.48e-02
1998 ugcug uucug 2.035 2.09e-02
Protein: DAZAP1(Hs/Mm)
Sequence Position Motif K-mer Z-score P-value
807 uagkwwr uaguaau 1.687 4.58e-02
895 uagkwwr ugggaag 1.910 2.81e-02
918 uagkwwr uaggggg 2.045 2.04e-02
Protein: ENOX1(Hs/Mm)
Sequence Position Motif K-mer Z-score P-value
312 hrkacag cucacag 2.313 1.04e-02
317 hrkacag aggacaa 2.219 1.32e-02
337 hrkacag caaacag 2.563 5.19e-03
Protein: ESRP2(Hs/Mm)
Sequence Position Motif K-mer Z-score P-value
557 ugggrad uggggga 2.447 7.20e-03
558 ugggrad gggggaa 2.368 8.94e-03
895 ugggrad ugggaag 2.237 1.26e-02
1093 ugggrad uggggac 1.882 2.99e-02
1501 ugggrad uggagau 2.158 1.55e-02
1522 ugggrad ugggagg 2.513 5.99e-03
Protein: FMR1(Hs/Mm)
Sequence Position Motif K-mer Z-score P-value
318 kgacarg ggacaag 2.111 1.74e-02
372 kgacarg ggagagg 2.583 4.90e-03
1096 kgacarg ggacacu 2.014 2.20e-02
1118 kgacarg ggacccg 2.514 5.97e-03
Protein: FUS(Hs/Mm)
Sequence Position Motif K-mer Z-score P-value
125 cgcgc cacgc 2.867 2.07e-03
134 cgcgc aacgc 2.880 1.99e-03
136 cgcgc cgcgc 3.205 6.75e-04
138 cgcgc cgcgc 3.205 6.75e-04
218 cgcgc ggcgc 2.819 2.41e-03
235 cgcgc uacgc 3.542 1.99e-04
237 cgcgc cgcgc 3.639 1.37e-04
256 cgcgc ggcgc 3.361 3.88e-04
258 cgcgc cgcgc 3.361 3.88e-04
407 cgcgc ggcgc 1.771 3.83e-02
409 cgcgc cgcgc 1.771 3.83e-02
654 cgcgc cucgc 2.036 2.09e-02
660 cgcgc gccgc 2.036 2.09e-02
666 cgcgc accgc 2.036 2.09e-02
946 cgcgc cccgc 2.289 1.10e-02
969 cgcgc uccgc 2.386 8.52e-03
1105 cgcgc cccgc 2.024 2.15e-02
1108 cgcgc gccgc 2.024 2.15e-02
1121 cgcgc cccgc 2.024 2.15e-02
1379 cgcgc cccgc 2.024 2.15e-02
1396 cgcgc gccgc 2.506 6.11e-03
1399 cgcgc gccgc 2.506 6.11e-03
1415 cgcgc cucgc 2.036 2.09e-02
1667 cgcgc ugcgc 2.120 1.70e-02
1669 cgcgc cgcgc 1.952 2.55e-02
1749 cgcgc agcgc 2.506 6.11e-03
1752 cgcgc gccgc 2.265 1.18e-02
1755 cgcgc gccgc 2.265 1.18e-02
1814 cgcgc cucgc 2.446 7.22e-03
1827 cgcgc ugcgc 3.566 1.81e-04
1832 cgcgc cucgc 3.036 1.20e-03
1845 cgcgc agcgc 2.916 1.77e-03
Protein: FXR1(Hs/Mm)
Sequence Position Motif K-mer Z-score P-value
1239 aygacr uaugac 1.986 2.35e-02
1251 aygacr uacgac 1.857 3.17e-02
Protein: FXR2(Hs/Mm)
Sequence Position Motif K-mer Z-score P-value
857 dgacrrr ggaagag 2.057 1.98e-02
866 dgacrrr gggcgag 2.057 1.98e-02
1565 dgacrrr cgacgag 1.686 4.59e-02
Protein: G3BP2(Hs/Mm)
Sequence Position Motif K-mer Z-score P-value
317 aggaudr aggacaa 2.933 1.68e-03
323 aggaudr aggaugc 3.187 7.19e-04
1964 aggaudr aggaaca 2.667 3.83e-03
1973 aggaudr aagauga 3.053 1.13e-03
1979 aggaudr aggaaga 3.000 1.35e-03
Protein: HNRNPA1(Hs/Mm)
Sequence Position Motif K-mer Z-score P-value
349 duagggw cuacgga 2.324 1.01e-02
366 rgnyag agaaag 2.473 6.70e-03
368 duagggw aaaggga 3.068 1.08e-03
374 duagggw agagggu 2.770 2.80e-03
384 duagggw agaggga 3.027 1.23e-03
803 guaguagu gcuguagu 2.049 2.02e-02
806 guaguagu guaguaau 2.115 1.72e-02
823 rgnyag aggcag 3.145 8.30e-04
827 duagggw agaggga 1.662 4.83e-02
848 rgnyag ggcuag 2.909 1.81e-03
850 duagggw cuagggu 1.851 3.21e-02
898 duagggw gaaggga 1.716 4.31e-02
917 duagggw auagggg 1.932 2.67e-02
Protein: HNRNPA1L2(Hs/Mm)
Sequence Position Motif K-mer Z-score P-value
349 duagggw cuacgga 2.070 1.92e-02
368 duagggw aaaggga 2.690 3.57e-03
374 duagggw agagggu 2.634 4.22e-03
384 duagggw agaggga 2.690 3.57e-03
850 duagggw cuagggu 1.873 3.05e-02
917 duagggw auagggg 1.718 4.29e-02
Protein: HNRNPA2B1(Hs/Mm)
Sequence Position Motif K-mer Z-score P-value
349 duagggw cuacgga 2.453 7.08e-03
368 duagggw aaaggga 3.360 3.90e-04
374 duagggw agagggu 3.000 1.35e-03
377 aggwuhgr ggguuuga 1.818 3.45e-02
384 duagggw agaggga 3.293 4.96e-04
400 gguaguag aaugguag 2.431 7.53e-03
403 gguaguag gguaggcg 2.523 5.82e-03
748 duagggw ggaggga 1.760 3.92e-02
752 duagggw ggaggga 1.760 3.92e-02
827 duagggw agaggga 1.800 3.59e-02
850 duagggw cuagggu 1.853 3.19e-02
898 duagggw gaaggga 1.853 3.19e-02
917 duagggw auagggg 1.947 2.58e-02
Protein: HNRNPC(Hs/Mm)
Sequence Position Motif K-mer Z-score P-value
52 huuuuuk guuauuu 2.179 1.47e-02
53 huuuuuk uuauuuu 2.205 1.37e-02
55 huuuuuk auuuuaa 2.179 1.47e-02
1164 huuuuuk gauuuuu 2.786 2.67e-03
1165 huuuuuk auuuuuu 3.473 2.57e-04
1166 huuuuuk uuuuuuu 3.348 4.07e-04
1167 huuuuuk uuuuuuc 3.170 7.62e-04
Protein: HNRNPCL1(Hs/Mm)
Sequence Position Motif K-mer Z-score P-value
52 huuuuuk guuauuu 2.105 1.76e-02
53 huuuuuk uuauuuu 2.140 1.62e-02
55 huuuuuk auuuuaa 2.079 1.88e-02
1164 huuuuuk gauuuuu 2.781 2.71e-03
1165 huuuuuk auuuuuu 3.456 2.74e-04
1166 huuuuuk uuuuuuu 3.351 4.03e-04
1167 huuuuuk uuuuuuc 3.149 8.19e-04
Protein: HNRNPF(Hs/Mm)
Sequence Position Motif K-mer Z-score P-value
240 gggug gcgug 2.062 1.96e-02
245 gggug gcgug 2.062 1.96e-02
247 gukgykg guggcgg 2.410 7.98e-03
250 gukgykg gcggugg 2.721 3.25e-03
251 gggug cggug 2.402 8.15e-03
255 gggug gggcg 2.402 8.15e-03
273 gggug cggug 2.062 1.96e-02
275 gggug gugug 2.062 1.96e-02
277 gukgykg guggagg 2.148 1.59e-02
536 gggug ggguu 2.062 1.96e-02
552 gggug gggcg 2.062 1.96e-02
554 gggug gcgug 2.062 1.96e-02
558 gggug ggggg 2.062 1.96e-02
830 gggug gggag 2.062 1.96e-02
840 gggug gggcg 2.062 1.96e-02
853 gggug gggug 2.955 1.56e-03
866 gggug gggcg 2.062 1.96e-02
Protein: HNRNPH1(Hs/Mm)
Sequence Position Motif K-mer Z-score P-value
354 gargag gaggag 3.030 1.22e-03
362 gargag gcagag 2.810 2.48e-03
372 gargag ggagag 2.810 2.48e-03
858 gargag gaagag 2.920 1.75e-03
872 gargag gcagag 2.510 6.04e-03
1281 gargag gacgag 2.730 3.17e-03
1284 gargag gaggag 2.890 1.93e-03
1287 gargag gaggag 2.890 1.93e-03
1963 gargag gaggaa 2.940 1.64e-03
1972 gargag gaagau 3.160 7.89e-04
1975 gargag gaugag 3.230 6.19e-04
1978 gargag gaggaa 2.940 1.64e-03
1981 gargag gaagaa 3.390 3.49e-04
2005 gargag gaaaag 2.420 7.76e-03
Protein: HNRNPH2(Hs/Mm)
Sequence Position Motif K-mer Z-score P-value
352 gggaggg cggagga 2.556 5.29e-03
371 gggaggg gggagag 3.111 9.32e-04
373 gggaggg gagaggg 3.167 7.70e-04
383 gggaggg gagaggg 3.156 8.00e-04
712 gggaggg ggcaggg 2.544 5.48e-03
747 gggaggg cggaggg 3.189 7.14e-04
751 gggaggg gggaggg 3.444 2.87e-04
830 gggaggg gggagcg 2.922 1.74e-03
840 gggaggg gggcggc 2.778 2.73e-03
853 gggaggg gggugga 2.478 6.61e-03
896 gggaggg gggaagg 2.767 2.83e-03
897 gggaggg ggaaggg 2.789 2.64e-03
Protein: HNRNPK(Hs/Mm)
Sequence Position Motif K-mer Z-score P-value
205 ccawmcc ccagccu 1.855 3.18e-02
495 ccawmcc ccuuccc 3.333 4.30e-04
500 ccawmcc cccaccc 3.507 2.27e-04
501 ccawmcc ccacccu 3.174 7.52e-04
504 ccawmcc cccuccc 3.261 5.55e-04
509 ccawmcc cccaccc 3.507 2.27e-04
510 ccawmcc ccacccu 3.174 7.52e-04
513 ccawmcc cccuccc 3.261 5.55e-04
529 ccawmcc cccuccc 3.188 7.16e-04
938 ccawmcc ccagccc 3.406 3.30e-04
942 ccawmcc cccuccc 3.072 1.06e-03
958 ccawmcc ccagcca 3.304 4.77e-04
972 ccawmcc gcaaccc 2.275 1.15e-02
1374 ccawmcc cccaccc 3.319 4.52e-04
1375 ccawmcc ccacccc 3.449 2.81e-04
1392 ccawmcc ccuagcc 3.029 1.23e-03
1689 ccawmcc ccgaacc 2.754 2.94e-03
1690 ccawmcc cgaaccc 2.899 1.87e-03
1792 ccawmcc ccuaccc 2.261 1.19e-02
1910 ccawmcc cgagccc 2.261 1.19e-02
Protein: HNRNPL(Hs/Mm)
Sequence Position Motif K-mer Z-score P-value
311 amayama acucaca 2.267 1.17e-02
315 acacrav acaggac 1.986 2.35e-02
1037 acacrav acaacac 2.563 5.19e-03
1040 acacrav acacccg 2.634 4.22e-03
1042 acacrav acccgag 2.648 4.05e-03
1054 acacrav acgcgac 2.648 4.05e-03
1435 amayama ucacacc 1.840 3.29e-02
1935 acacrav acaccgc 1.915 2.77e-02
Protein: HNRNPM(Hs/Mm)
Sequence Position Motif K-mer Z-score P-value
47 gguugguu gcuggguu 2.444 7.26e-03
51 gguugguu gguuauuu 2.444 7.26e-03
Protein: HNRPLL(Hs/Mm)
Sequence Position Motif K-mer Z-score P-value
311 rcahaca acucaca 3.089 1.00e-03
336 rcahaca ucaaaca 2.633 4.23e-03
1435 rcahaca ucacacc 1.734 4.15e-02
Protein: HuR(Hs/Mm)
Sequence Position Motif K-mer Z-score P-value
48 uukruuu cuggguu 2.209 1.36e-02
52 uukruuu guuauuu 2.527 5.75e-03
53 uukruuu uuauuuu 2.714 3.32e-03
73 uukruuu aucguuu 2.659 3.92e-03
74 uukruuu ucguuuu 2.220 1.32e-02
1162 uukruuu uggauuu 2.549 5.40e-03
1165 uukruuu auuuuuu 2.516 5.93e-03
1166 uukruuu uuuuuuu 2.725 3.22e-03
Protein: IGF2BP2(Hs/Mm)
Sequence Position Motif K-mer Z-score P-value
1581 vmahwca aaaaaca 2.479 6.59e-03
Protein: IGF2BP3(Hs/Mm)
Sequence Position Motif K-mer Z-score P-value
311 amahwca acucaca 1.940 2.62e-02
1581 amahwca aaaaaca 2.373 8.82e-03
Protein: KHDRBS1(Hs/Mm)
Sequence Position Motif K-mer Z-score P-value
566 auaaaav agaaaaa 2.093 1.82e-02
568 auaaaav aaaaaag 2.144 1.60e-02
Protein: KHDRBS2(Hs/Mm)
Sequence Position Motif K-mer Z-score P-value
565 rauaaam aagaaaa 2.047 2.03e-02
567 rauaaam gaaaaaa 2.094 1.81e-02
Protein: KHDRBS3(Hs/Mm)
Sequence Position Motif K-mer Z-score P-value
565 auaaav aagaaa 1.925 2.71e-02
567 auaaav gaaaaa 2.057 1.98e-02
568 auaaav aaaaaa 1.925 2.71e-02
Protein: LIN28A(Hs/Mm)
Sequence Position Motif K-mer Z-score P-value
352 hggagwa cggagga 3.527 2.10e-04
355 hggagwa aggagca 3.486 2.45e-04
363 hggagwa cagagaa 3.568 1.80e-04
371 hggagwa gggagag 3.568 1.80e-04
387 hggagwa gggagca 2.419 7.78e-03
558 hggagwa gggggaa 1.905 2.84e-02
560 hggagwa gggaaaa 1.865 3.11e-02
736 hggagwa gggaaaa 1.811 3.51e-02
747 hggagwa cggaggg 2.324 1.01e-02
1285 hggagwa aggagga 1.878 3.02e-02
1288 hggagwa aggagaa 3.135 8.59e-04
1501 hggagwa uggagau 2.541 5.53e-03
1523 hggagwa gggagga 3.000 1.35e-03
1526 hggagwa aggagac 3.122 8.98e-04
1534 hggagwa uggugaa 2.365 9.02e-03
1980 hggagwa ggaagaa 2.176 1.48e-02
Protein: MATR3(Hs/Mm)
Sequence Position Motif K-mer Z-score P-value
60 maucuur aaucauu 2.176 1.48e-02
993 maucuur aaacuuu 1.784 3.72e-02
Protein: MBNL1(Hs/Mm)
Sequence Position Motif K-mer Z-score P-value
41 ygcuky ugcguu 2.402 8.15e-03
43 ygcuky cguugc 2.402 8.15e-03
46 ygcuky ugcugg 2.294 1.09e-02
75 ygcuky cguuuu 2.098 1.80e-02
89 ygcuky ugccuc 2.098 1.80e-02
127 ygcuky cgcucu 1.990 2.33e-02
152 ygcuky cccuuc 2.294 1.09e-02
155 ygcuky uucuuu 2.088 1.84e-02
192 ygcuky cgcggc 2.078 1.89e-02
197 ygcuky cccuuu 2.284 1.12e-02
222 ygcuky cccugc 2.294 1.09e-02
225 ygcuky ugcagc 2.098 1.80e-02
228 gcuugc agccug 1.948 2.57e-02
260 ygcuky cgcagu 2.294 1.09e-02
265 ygcuky ugcguu 2.402 8.15e-03
273 ygcuky cggugu 2.402 8.15e-03
283 ygcuky ggcagc 1.657 4.88e-02
286 ygcuky agcugu 2.402 8.15e-03
303 ygcuky ugauuu 2.294 1.09e-02
327 ygcuky ugcggu 2.353 9.31e-03
329 ygcuky cgguuu 2.196 1.40e-02
344 ygcuky uacugc 2.294 1.09e-02
347 ygcuky ugcuac 2.294 1.09e-02
426 ygcuky ugcggc 2.098 1.80e-02
439 ygcuky cucugu 2.098 1.80e-02
469 ygcuky ggcugc 1.686 4.59e-02
629 ygcuky ggcuga 1.941 2.61e-02
644 ygcuky agcugu 2.706 3.41e-03
646 ygcuky cugugc 1.990 2.33e-02
649 ygcuky ugcugc 3.108 9.42e-04
652 ygcuky ugcucg 1.990 2.33e-02
656 ygcuky cgcggc 2.706 3.41e-03
659 ygcuky ggccgc 1.990 2.33e-02
662 ygcuky cgccac 1.990 2.33e-02
665 ygcuky caccgc 1.990 2.33e-02
668 ygcuky cgccgg 1.990 2.33e-02
697 ygcuky uccugc 2.294 1.09e-02
700 ygcuky ugccuc 2.294 1.09e-02
717 ygcuky ggcuuc 2.196 1.40e-02
728 gcuugc ggcuug 1.974 2.42e-02
762 ygcuky cgcuga 1.892 2.92e-02
778 ygcuky cgguuu 2.755 2.93e-03
779 ygcuky gguuuu 1.990 2.33e-02
785 ygcuky cggggc 2.029 2.12e-02
788 ygcuky ggcuuu 2.657 3.94e-03
802 ygcuky cgcugu 3.088 1.01e-03
805 ygcuky uguagu 1.784 3.72e-02
810 ygcuky uaauuc 1.784 3.72e-02
876 ygcuky agcugc 2.402 8.15e-03
879 ygcuky ugcgcu 1.784 3.72e-02
881 ygcuky cgcugc 2.814 2.45e-03
884 ygcuky ugcggg 1.843 3.27e-02
888 ygcuky ggcguc 1.843 3.27e-02
892 ygcuky uccugg 1.843 3.27e-02
923 ygcuky ggcuuc 2.275 1.15e-02
928 ygcuky cgccuc 2.284 1.12e-02
948 ygcuky cgcuga 2.294 1.09e-02
980 ygcuky ugccgc 2.088 1.84e-02
983 ygcuky cgcauc 2.088 1.84e-02
1082 ygcuky uucugc 2.294 1.09e-02
1087 ygcuky cccauu 2.039 2.07e-02
1088 ygcuky ccauuu 2.039 2.07e-02
1099 ygcuky cacuuc 3.059 1.11e-03
1104 ygcuky ccccgc 2.275 1.15e-02
1107 ygcuky cgccgc 3.059 1.11e-03
1110 ygcuky cgcugc 3.618 1.48e-04
1123 ygcuky cgcuuc 3.706 1.05e-04
1126 ygcuky uucucu 2.284 1.12e-02
1128 ygcuky cucuga 2.284 1.12e-02
1136 ygcuky ggcucu 2.069 1.93e-02
1138 ygcuky cucucc 2.069 1.93e-02
1140 ygcuky cuccuu 2.069 1.93e-02
1141 gcuugc uccuug 2.883 1.97e-03
1142 ygcuky ccuugc 2.069 1.93e-02
1145 ygcuky ugcagc 2.863 2.10e-03
1148 ygcuky agcugc 2.863 2.10e-03
1151 ygcuky ugcuua 2.402 8.15e-03
1159 ygcuky cgcugg 2.402 8.15e-03
1204 ygcuky cgaugc 2.069 1.93e-02
1221 ygcuky agcuuc 1.990 2.33e-02
1258 ygcuky cggugc 2.294 1.09e-02
1261 ygcuky ugcagc 2.294 1.09e-02
1275 ygcuky uacugc 2.294 1.09e-02
1321 ygcuky agcugc 2.078 1.89e-02
1324 ygcuky ugcagc 2.069 1.93e-02
1366 ygcuky agcugc 2.500 6.21e-03
1369 ygcuky ugcugc 2.912 1.80e-03
1378 ygcuky ccccgc 2.039 2.07e-02
1381 ygcuky cgcccc 2.039 2.07e-02
1384 ygcuky cccugu 2.843 2.23e-03
1398 ygcuky cgccgc 2.402 8.15e-03
1401 ygcuky cgcucc 2.402 8.15e-03
1408 ygcuky ggcucu 1.676 4.69e-02
1410 ygcuky cucugc 2.451 7.12e-03
1413 ygcuky ugcucg 1.657 4.88e-02
1417 ygcuky cgcccu 1.676 4.69e-02
1419 ygcuky cccucc 1.676 4.69e-02
1422 ygcuky uccuac 1.676 4.69e-02
1425 ygcuky uacguu 1.676 4.69e-02
1427 ygcuky cguugc 2.451 7.12e-03
1430 ygcuky ugcggu 2.451 7.12e-03
1440 ygcuky cccuuc 2.392 8.38e-03
1447 ygcuky cccuuc 2.392 8.38e-03
1498 gcuugc agcugg 2.130 1.66e-02
1516 ygcuky agcugc 1.892 2.92e-02
1519 ygcuky ugcugg 1.892 2.92e-02
1614 ygcuky ggcuuc 2.088 1.84e-02
1625 ygcuky cgccgc 2.088 1.84e-02
1633 gcuugc agcucg 2.078 1.89e-02
1701 ygcuky cgcggc 2.088 1.84e-02
1716 ygcuky ugcucc 2.088 1.84e-02
1751 ygcuky cgccgc 2.373 8.82e-03
1754 ygcuky cgccgc 2.373 8.82e-03
1757 ygcuky cgccuc 2.392 8.38e-03
1767 ygcuky ugcauc 2.392 8.38e-03
1824 ygcuky uccugc 2.245 1.24e-02
1829 ygcuky cgccuc 2.284 1.12e-02
1847 ygcuky cgccuu 2.402 8.15e-03
1848 ygcuky gccuuc 1.657 4.88e-02
1870 ygcuky cucugc 2.294 1.09e-02
1873 ygcuky ugcucu 2.098 1.80e-02
1918 ygcuky uggugc 2.039 2.07e-02
1921 ygcuky ugcucc 1.990 2.33e-02
1989 ygcuky cgaugu 2.196 1.40e-02
1992 ygcuky uguugu 2.294 1.09e-02
1995 ygcuky uguuuc 2.353 9.31e-03
1998 ygcuky uucugu 2.353 9.31e-03
Protein: NOVA1(Hs/Mm)
Sequence Position Motif K-mer Z-score P-value
143 ycay ccau 2.750 2.98e-03
492 ycay ccac 2.750 2.98e-03
501 ycay ccac 3.380 3.62e-04
510 ycay ccac 3.380 3.62e-04
519 ycay ccau 2.750 2.98e-03
1576 ycay ucau 2.750 2.98e-03
1588 ycay ucau 2.750 2.98e-03
1591 ycay ucau 2.750 2.98e-03
1925 ycay ccau 2.750 2.98e-03
1942 ycay ccac 2.750 2.98e-03
1945 ycay ccac 2.750 2.98e-03
Protein: PABPC1(Hs/Mm)
Sequence Position Motif K-mer Z-score P-value
390 araaaam agcaaaa 2.873 2.03e-03
393 araaaam aaaagaa 2.725 3.22e-03
394 araaaam aaagaaa 2.725 3.22e-03
395 araaaam aagaaaa 2.725 3.22e-03
396 araaaam agaaaau 2.961 1.53e-03
563 araaaam aaaagaa 3.078 1.04e-03
564 araaaam aaagaaa 3.078 1.04e-03
565 araaaam aagaaaa 3.078 1.04e-03
566 araaaam agaaaaa 3.569 1.79e-04
567 araaaam gaaaaaa 3.265 5.47e-04
568 araaaam aaaaaag 3.265 5.47e-04
569 araaaam aaaaaga 3.265 5.47e-04
737 araaaam ggaaaaa 2.608 4.55e-03
739 araaaam aaaaaga 2.539 5.56e-03
740 araaaam aaaagaa 2.392 8.38e-03
1579 araaaam ucaaaaa 2.314 1.03e-02
1581 araaaam aaaaaca 2.392 8.38e-03
1983 araaaam agaaauc 2.186 1.44e-02
Protein: PABPC3(Hs/Mm)
Sequence Position Motif K-mer Z-score P-value
562 raaaacm gaaaaga 3.034 1.21e-03
567 raaaacm gaaaaaa 3.068 1.08e-03
568 raaaacm aaaaaag 2.716 3.30e-03
569 raaaacm aaaaaga 2.636 4.19e-03
738 raaaacm gaaaaag 1.989 2.34e-02
739 raaaacm aaaaaga 1.943 2.60e-02
1182 raaaacm gaaaacc 2.909 1.81e-03
1183 raaaacm aaaacca 2.307 1.05e-02
1581 raaaacm aaaaaca 1.761 3.91e-02
2005 raaaacm gaaaaga 2.080 1.88e-02
Protein: PABPC4(Hs/Mm)
Sequence Position Motif K-mer Z-score P-value
392 aaaaaar caaaaga 2.700 3.47e-03
393 aaaaaar aaaagaa 2.864 2.09e-03
394 aaaaaar aaagaaa 2.864 2.09e-03
395 aaaaaar aagaaaa 2.864 2.09e-03
396 aaaaaar agaaaau 2.636 4.19e-03
562 aaaaaar gaaaaga 3.036 1.20e-03
563 aaaaaar aaaagaa 3.218 6.45e-04
564 aaaaaar aaagaaa 3.218 6.45e-04
565 aaaaaar aagaaaa 3.218 6.45e-04
566 aaaaaar agaaaaa 3.391 3.48e-04
567 aaaaaar gaaaaaa 3.400 3.37e-04
568 aaaaaar aaaaaag 3.482 2.49e-04
569 aaaaaar aaaaaga 3.445 2.86e-04
737 aaaaaar ggaaaaa 2.609 4.54e-03
738 aaaaaar gaaaaag 2.736 3.11e-03
739 aaaaaar aaaaaga 2.945 1.61e-03
740 aaaaaar aaaagaa 2.818 2.42e-03
1579 aaaaaar ucaaaaa 2.291 1.10e-02
1580 aaaaaar caaaaac 2.391 8.40e-03
1581 aaaaaar aaaaaca 2.609 4.54e-03
2005 aaaaaar gaaaaga 2.245 1.24e-02
2006 aaaaaar aaaagag 2.182 1.46e-02
Protein: PABPC5(Hs/Mm)
Sequence Position Motif K-mer Z-score P-value
366 agaaadu agaaagg 1.795 3.63e-02
396 agaaadu agaaaau 1.761 3.91e-02
561 agaaadu ggaaaag 2.545 5.46e-03
566 agaaadu agaaaaa 2.886 1.95e-03
568 agaaadu aaaaaag 2.636 4.19e-03
1971 agaaadu agaagau 2.125 1.68e-02
1983 agaaadu agaaauc 2.636 4.19e-03
2004 agaaadu ggaaaag 1.795 3.63e-02
Protein: PABPN1(Hs/Mm)
Sequence Position Motif K-mer Z-score P-value
361 araaga agcaga 1.704 4.42e-02
393 araaga aaaaga 2.500 6.21e-03
396 araaga agaaaa 2.472 6.72e-03
546 araaga agcaga 3.083 1.02e-03
563 araaga aaaaga 3.444 2.87e-04
566 araaga agaaaa 3.398 3.39e-04
568 araaga aaaaaa 3.111 9.32e-04
570 araaga aaaaga 3.444 2.87e-04
1968 araaga acaaga 3.185 7.24e-04
1971 araaga agaaga 3.454 2.76e-04
1974 araaga agauga 3.028 1.23e-03
1980 araaga ggaaga 3.120 9.04e-04
2006 araaga aaaaga 2.537 5.59e-03
Protein: PCBP1(Hs/Mm)
Sequence Position Motif K-mer Z-score P-value
97 ccwwhcc ucauucc 1.805 3.55e-02
198 ccwwhcc ccuuucc 3.403 3.33e-04
199 ccwwhcc cuuuccc 2.870 2.05e-03
204 ccwwhcc cccagcc 2.857 2.14e-03
209 ccwwhcc ccuuagc 2.948 1.60e-03
487 ccwwhcc ccucccc 3.610 1.53e-04
490 ccwwhcc ccccacc 3.377 3.66e-04
495 ccwwhcc ccuuccc 3.948 3.94e-05
499 ccwwhcc ccccacc 3.377 3.66e-04
500 ccwwhcc cccaccc 3.532 2.06e-04
504 ccwwhcc cccuccc 3.740 9.20e-05
505 ccwwhcc ccucccc 3.649 1.32e-04
508 ccwwhcc ccccacc 3.390 3.49e-04
509 ccwwhcc cccaccc 3.545 1.96e-04
513 ccwwhcc cccuccc 3.740 9.20e-05
514 ccwwhcc ccucccc 3.649 1.32e-04
528 ccwwhcc ccccucc 3.156 8.00e-04
529 ccwwhcc cccuccc 3.468 2.62e-04
937 ccwwhcc cccagcc 2.506 6.11e-03
938 ccwwhcc ccagccc 2.506 6.11e-03
942 ccwwhcc cccuccc 2.688 3.59e-03
957 ccwwhcc cccagcc 2.974 1.47e-03
977 ccwwhcc ccuugcc 2.909 1.81e-03
1374 ccwwhcc cccaccc 3.169 7.65e-04
1375 ccwwhcc ccacccc 3.091 9.97e-04
1385 ccwwhcc ccugucc 3.455 2.75e-04
1392 ccwwhcc ccuagcc 3.442 2.89e-04
1400 ccwwhcc ccgcucc 2.948 1.60e-03
1786 ccwwhcc ucuuccc 2.390 8.42e-03
1791 ccwwhcc cccuacc 2.727 3.20e-03
1792 ccwwhcc ccuaccc 2.753 2.95e-03
1891 ccwwhcc ccucccc 2.013 2.21e-02
Protein: PCBP2(Hs/Mm)
Sequence Position Motif K-mer Z-score P-value
101 ccyycch uccuccc 1.900 2.87e-02
102 ccyycch ccucccu 2.013 2.21e-02
167 ccyycch cucuccc 2.263 1.18e-02
486 ccyycch uccuccc 3.475 2.55e-04
487 ccyycch ccucccc 4.088 2.18e-05
495 ccyycch ccuuccc 4.250 1.07e-05
496 ccyycch cuucccc 3.638 1.37e-04
500 ccyycch cccaccc 3.675 1.19e-04
504 ccyycch cccuccc 4.075 2.30e-05
505 ccyycch ccucccc 4.150 1.66e-05
509 ccyycch cccaccc 3.675 1.19e-04
513 ccyycch cccuccc 4.063 2.42e-05
514 ccyycch ccucccc 4.137 1.76e-05
529 ccyycch cccuccc 3.913 4.56e-05
530 ccyycch ccucccg 3.475 2.55e-04
681 ccyycch ccguccc 2.912 1.80e-03
690 ccyycch gcucccc 2.700 3.47e-03
694 ccyycch cccuccu 2.825 2.36e-03
698 ccyycch ccugccu 2.675 3.74e-03
942 ccyycch cccuccc 2.463 6.89e-03
943 ccyycch ccucccg 2.250 1.22e-02
1100 ccyycch acuuccc 2.088 1.84e-02
1101 ccyycch cuucccc 2.050 2.02e-02
1374 ccyycch cccaccc 2.962 1.53e-03
1375 ccyycch ccacccc 2.925 1.72e-03
1379 ccyycch cccgccc 2.925 1.72e-03
1380 ccyycch ccgcccc 2.925 1.72e-03
1786 ccyycch ucuuccc 3.075 1.05e-03
1787 ccyycch cuucccc 2.950 1.59e-03
1791 ccyycch cccuacc 2.850 2.19e-03
1792 ccyycch ccuaccc 3.163 7.81e-04
Protein: PCBP3(Hs/Mm)
Sequence Position Motif K-mer Z-score P-value
76 uuuycc guuuuc 2.324 1.01e-02
77 uuuycc uuuucc 2.622 4.37e-03
98 uuuycc cauucc 2.405 8.09e-03
157 uuuycc cuuucc 1.716 4.31e-02
199 uuuycc cuuucc 2.541 5.53e-03
495 uuuycc ccuucc 1.986 2.35e-02
496 uuuycc cuuccc 1.892 2.92e-02
978 uuuycc cuugcc 1.865 3.11e-02
996 uuuycc cuuugc 2.486 6.46e-03
1021 uuuycc cuuugc 1.959 2.51e-02
1100 uuuycc acuucc 1.811 3.51e-02
1101 uuuycc cuuccc 1.811 3.51e-02
Protein: PPRC1(Hs/Mm)
Sequence Position Motif K-mer Z-score P-value
135 ssgcgcs acgcgcg 2.000 2.27e-02
137 ssgcgcs gcgcgcc 2.077 1.89e-02
217 ssgcgcs aggcgcc 2.859 2.12e-03
236 ssgcgcs acgcgcg 3.808 7.00e-05
238 ssgcgcs gcgcgug 3.449 2.81e-04
255 ssgcgcs gggcgcg 3.731 9.54e-05
257 ssgcgcs gcgcgca 3.615 1.50e-04
406 ssgcgcs aggcgcg 1.833 3.34e-02
408 ssgcgcs gcgcgcg 2.128 1.67e-02
834 ssgcgcs gcgagcg 2.026 2.14e-02
838 ssgcgcs gcgggcg 2.026 2.14e-02
885 ssgcgcs gcgggcg 2.462 6.91e-03
1378 ssgcgcs ccccgcc 2.064 1.95e-02
1666 ssgcgcs cugcgcg 1.705 4.41e-02
1668 ssgcgcs gcgcgca 1.744 4.06e-02
1694 ssgcgcs ccccgcc 2.795 2.60e-03
1696 ssgcgcs ccgcccg 2.795 2.60e-03
1698 ssgcgcs gcccgcg 2.936 1.66e-03
1748 ssgcgcs gagcgcc 2.115 1.72e-02
1826 ssgcgcs cugcgcc 2.282 1.12e-02
Protein: PTBP1(Hs/Mm)
Sequence Position Motif K-mer Z-score P-value
82 cucucu cuccuu 2.205 1.37e-02
90 cucucu gccucu 2.196 1.40e-02
92 cucucu cucuau 2.848 2.20e-03
94 cucucu cuauca 2.196 1.40e-02
103 cucucu cucccu 2.955 1.56e-03
105 cucucu cccuau 2.259 1.19e-02
107 cucucu cuaucu 2.955 1.56e-03
125 cucucu cacgcu 2.188 1.43e-02
127 cucucu cgcucu 2.839 2.26e-03
129 cucucu cucuga 2.098 1.80e-02
153 cucucu ccuucu 2.205 1.37e-02
155 cucucu uucuuu 2.205 1.37e-02
156 ucuu ucuu 3.214 6.55e-04
157 cucucu cuuucc 2.205 1.37e-02
160 ucuu uccu 2.375 8.77e-03
165 cucucu cacucu 2.857 2.14e-03
167 cucucu cucucc 2.857 2.14e-03
168 ucuu ucuc 2.375 8.77e-03
169 cucucu cucccu 2.857 2.14e-03
177 cucucu gacucu 2.205 1.37e-02
179 cucucu cucuug 2.205 1.37e-02
180 ucuu ucuu 3.214 6.55e-04
198 ucuu ccuu 1.884 2.98e-02
423 ucuu ucau 2.098 1.80e-02
429 cucucu ggcucu 2.473 6.70e-03
431 cucucu cucucu 3.402 3.34e-04
432 ucuu ucuc 2.134 1.64e-02
433 cucucu cucuua 2.473 6.70e-03
434 ucuu ucuu 2.688 3.59e-03
435 cucucu cuuacu 2.464 6.87e-03
437 cucucu uacucu 2.464 6.87e-03
439 cucucu cucugu 3.027 1.23e-03
440 ucuu ucug 2.134 1.64e-02
441 cucucu cuguuu 2.473 6.70e-03
442 ucuu uguu 2.134 1.64e-02
448 cucucu cauccu 1.741 4.08e-02
450 ucuu uccu 2.098 1.80e-02
576 cucucu uccucu 2.536 5.61e-03
578 cucucu cucucu 3.554 1.90e-04
580 cucucu cucucg 3.205 6.75e-04
582 cucucu cucgcu 3.223 6.34e-04
584 cucucu cgcuaa 1.830 3.36e-02
587 cucucu uaaucu 1.830 3.36e-02
589 cucucu aucucc 2.571 5.07e-03
591 cucucu cuccgc 1.830 3.36e-02
594 cucucu cgccca 1.830 3.36e-02
596 cucucu cccacc 1.830 3.36e-02
602 cucucu ggcccu 1.830 3.36e-02
604 cucucu cccuuu 2.071 1.92e-02
606 cucucu cuuuau 1.839 3.30e-02
790 cucucu cuuuau 1.884 2.98e-02
792 cucucu uuaucu 1.884 2.98e-02
796 cucucu cuaacu 1.884 2.98e-02
800 cucucu cucgcu 2.259 1.19e-02
802 cucucu cgcugu 1.884 2.98e-02
1058 cucucu gacucu 1.741 4.08e-02
1060 cucucu cucucc 2.107 1.76e-02
1062 cucucu cucccg 1.741 4.08e-02
1121 cucucu cccgcu 2.098 1.80e-02
1126 cucucu uucucu 2.652 4.00e-03
1128 cucucu cucuga 2.098 1.80e-02
1136 cucucu ggcucu 2.098 1.80e-02
1138 cucucu cucucc 2.652 4.00e-03
1140 cucucu cuccuu 2.098 1.80e-02
1438 cucucu cacccu 1.920 2.74e-02
1441 cucucu ccuucu 1.911 2.80e-02
1443 cucucu uucucc 1.884 2.98e-02
1445 cucucu cucccu 2.214 1.34e-02
1776 cucucu cccucg 2.027 2.13e-02
1778 cucucu cucggu 2.027 2.13e-02
1786 ucuu ucuu 2.161 1.53e-02
1796 cucucu cccucu 2.625 4.33e-03
1798 cucucu cucuca 2.625 4.33e-03
1799 ucuu ucuc 1.884 2.98e-02
1814 cucucu cucgcc 2.027 2.13e-02
1832 cucucu cucgca 2.098 1.80e-02
1849 cucucu ccuucu 2.205 1.37e-02
1851 cucucu uucucu 2.955 1.56e-03
1853 cucucu cucucc 2.955 1.56e-03
1855 cucucu cuccgu 2.250 1.22e-02
1868 cucucu uucucu 2.955 1.56e-03
1870 cucucu cucugc 2.250 1.22e-02
1873 cucucu ugcucu 2.250 1.22e-02
1875 cucucu cucucc 2.946 1.61e-03
1892 cucucu cucccc 2.071 1.92e-02
Protein: PUM2(Hs/Mm)
Sequence Position Motif K-mer Z-score P-value
767 uguanaua aguauaaa 1.864 3.12e-02
791 uguanaua uuuaucua 1.773 3.81e-02
Protein: RALY(Hs/Mm)
Sequence Position Motif K-mer Z-score P-value
53 uuuuuub uuauuuu 1.714 4.33e-02
54 uuuuuub uauuuua 1.670 4.75e-02
1165 uuuuuub auuuuuu 3.080 1.03e-03
1166 uuuuuub uuuuuuu 3.438 2.93e-04
1167 uuuuuub uuuuuuc 3.429 3.03e-04
1168 uuuuuub uuuuucg 3.268 5.42e-04
Protein: RBM24(Hs/Mm)
Sequence Position Motif K-mer Z-score P-value
263 wgwgugd agugcgu 2.610 4.53e-03
Protein: RBM28(Hs/Mm)
Sequence Position Motif K-mer Z-score P-value
275 gwguagd gugugga 2.181 1.46e-02
277 gwguagd guggagg 2.056 1.99e-02
1284 gwguagd gaggagg 2.236 1.27e-02
Protein: RBM38(Hs/Mm)
Sequence Position Motif K-mer Z-score P-value
264 kkguguk gugcguu 2.756 2.93e-03
273 kkguguk cggugug 2.987 1.41e-03
275 kkguguk gugugga 2.885 1.96e-03
552 kkguguk gggcgug 1.885 2.97e-02
554 kkguguk gcguggg 1.910 2.81e-02
556 kkguguk guggggg 1.859 3.15e-02
Protein: RBM4(Hs/Mm)
Sequence Position Motif K-mer Z-score P-value
137 gcgcgss gcgcgcc 1.714 4.33e-02
191 gcgcgss gcgcggc 2.077 1.89e-02
214 gcgcgss gcgaggc 3.418 3.15e-04
236 gcgcgss acgcgcg 3.473 2.57e-04
238 gcgcgss gcgcgug 3.780 7.84e-05
240 gcgcgss gcguggc 3.473 2.57e-04
245 gcgcgss gcguggc 3.451 2.79e-04
255 gcgcgss gggcgcg 3.297 4.89e-04
257 gcgcgss gcgcgca 3.604 1.57e-04
259 gcgcgss gcgcagu 3.385 3.56e-04
408 gcgcgss gcgcgcg 2.033 2.10e-02
410 gcgcgss gcgcgua 1.780 3.75e-02
554 gcgcgss gcguggg 2.319 1.02e-02
653 gcgcgss gcucgcg 2.099 1.79e-02
655 gcgcgss ucgcggc 2.220 1.32e-02
834 gcgcgss gcgagcg 3.044 1.17e-03
836 gcgcgss gagcggg 3.209 6.66e-04
838 gcgcgss gcgggcg 3.099 9.71e-04
840 gcgcgss gggcggc 3.066 1.08e-03
880 gcgcgss gcgcugc 2.593 4.76e-03
885 gcgcgss gcgggcg 2.582 4.91e-03
1010 gcgcgss gcgggcg 2.253 1.21e-02
1012 gcgcgss gggcggg 2.363 9.06e-03
1068 gcgcgss acgcggg 1.692 4.53e-02
1474 gcgcgss gcgggag 1.802 3.58e-02
Protein: RBM41(Hs/Mm)
Sequence Position Motif K-mer Z-score P-value
30 wuacwuk auacgug 2.531 5.69e-03
53 wuacwuk uuauuuu 2.000 2.27e-02
421 wuacwuk auucaug 2.531 5.69e-03
436 wuacwuk uuacucu 2.679 3.69e-03
445 wuacwuk uuacauc 2.543 5.50e-03
Protein: RBM42(Hs/Mm)
Sequence Position Motif K-mer Z-score P-value
1236 aacuamg aacuaug 2.486 6.46e-03
1248 aacuamg gacuacg 2.243 1.24e-02
Protein: RBM45(Hs/Mm)
Sequence Position Motif K-mer Z-score P-value
633 gacgamv gaggacc 1.667 4.78e-02
1458 gacgamv gacaacg 3.067 1.08e-03
1461 gacgamv aacgacg 3.233 6.12e-04
1464 gacgamv gacggcg 3.583 1.70e-04
1563 gacgamv gacgacg 2.400 8.20e-03
1566 gacgamv gacgaga 2.167 1.51e-02
1963 gacgamv gaggaac 2.167 1.51e-02
1981 gacgamv gaagaaa 2.267 1.17e-02
Protein: RBM46(Hs/Mm)
Sequence Position Motif K-mer Z-score P-value
1577 rausawd caucaaa 1.974 2.42e-02
Protein: RBM5(Hs/Mm)
Sequence Position Motif K-mer Z-score P-value
353 garggwr ggaggag 2.346 9.49e-03
368 garggwr aaaggga 2.782 2.70e-03
375 garggwr gaggguu 2.705 3.42e-03
385 garggwr gagggag 2.679 3.69e-03
734 garggwr gcgggaa 2.859 2.12e-03
749 garggwr gagggag 3.167 7.70e-04
753 garggwr gagggau 3.128 8.80e-04
898 garggwr gaaggga 2.359 9.16e-03
Protein: RBM6(Hs/Mm)
Sequence Position Motif K-mer Z-score P-value
1592 hauccar cauccag 2.183 1.45e-02
Protein: RBM8A(Hs/Mm)
Sequence Position Motif K-mer Z-score P-value
135 rygcgcb acgcgcg 3.797 7.32e-05
137 rygcgcb gcgcgcc 3.757 8.60e-05
139 rygcgcb gcgccca 3.149 8.19e-04
219 rygcgcb gcgcccu 3.405 3.31e-04
234 rygcgcb guacgcg 3.797 7.32e-05
236 rygcgcb acgcgcg 4.446 4.37e-06
238 rygcgcb gcgcgug 4.149 1.67e-05
253 rygcgcb gugggcg 3.770 8.16e-05
255 rygcgcb gggcgcg 4.203 1.32e-05
257 rygcgcb gcgcgca 4.284 9.18e-06
406 rygcgcb aggcgcg 2.919 1.76e-03
408 rygcgcb gcgcgcg 3.405 3.31e-04
525 rygcgcb gcgcccc 2.027 2.13e-02
834 rygcgcb gcgagcg 3.541 1.99e-04
838 rygcgcb gcgggcg 3.568 1.80e-04
864 rygcgcb ccgggcg 3.189 7.14e-04
878 rygcgcb cugcgcu 3.027 1.23e-03
885 rygcgcb gcgggcg 3.297 4.89e-04
1010 rygcgcb gcgggcg 2.541 5.53e-03
1014 rygcgcb gcgggca 2.284 1.12e-02
1318 rygcgcb gcgagcu 2.459 6.97e-03
1335 rygcgcb gcgccca 2.459 6.97e-03
1666 rygcgcb cugcgcg 1.878 3.02e-02
1668 rygcgcb gcgcgca 2.027 2.13e-02
Protein: RBMS1(Hs/Mm)
Sequence Position Motif K-mer Z-score P-value
27 kauauas aguauac 1.685 4.60e-02
Protein: RBMS3(Hs/Mm)
Sequence Position Motif K-mer Z-score P-value
306 hauaua uuuaua 1.979 2.39e-02
769 hauaua uauaaa 2.333 9.82e-03
Protein: SAMD4A(Hs/Mm)
Sequence Position Motif K-mer Z-score P-value
669 gckgghm gccgggc 2.568 5.11e-03
713 gckgghm gcagggc 2.395 8.31e-03
734 gckgghm gcgggaa 2.407 8.04e-03
838 gckgghm gcgggcg 2.753 2.95e-03
845 gckgghm gccggcu 2.580 4.94e-03
863 gckgghm gccgggc 3.185 7.24e-04
885 gckgghm gcgggcg 2.272 1.15e-02
1010 gckgghm gcgggcg 2.284 1.12e-02
1014 gckgghm gcgggca 2.333 9.82e-03
1499 gckgghm gcuggag 2.765 2.85e-03
1520 gckgghm gcuggga 1.654 4.91e-02
1649 gckgghm gcuggcc 2.889 1.93e-03
Protein: SART3(Hs/Mm)
Sequence Position Motif K-mer Z-score P-value
390 araaaam agcaaaa 2.882 1.98e-03
393 araaaam aaaagaa 2.735 3.12e-03
394 araaaam aaagaaa 2.735 3.12e-03
395 araaaam aagaaaa 2.735 3.12e-03
396 araaaam agaaaau 2.961 1.53e-03
563 araaaam aaaagaa 3.088 1.01e-03
564 araaaam aaagaaa 3.088 1.01e-03
565 araaaam aagaaaa 3.088 1.01e-03
566 araaaam agaaaaa 3.578 1.73e-04
567 araaaam gaaaaaa 3.275 5.28e-04
568 araaaam aaaaaag 3.275 5.28e-04
569 araaaam aaaaaga 3.275 5.28e-04
737 araaaam ggaaaaa 2.618 4.42e-03
739 araaaam aaaaaga 2.549 5.40e-03
740 araaaam aaaagaa 2.392 8.38e-03
1579 araaaam ucaaaaa 2.324 1.01e-02
1581 araaaam aaaaaca 2.402 8.15e-03
1983 araaaam agaaauc 2.186 1.44e-02
Protein: SNRNP70(Hs/Mm)
Sequence Position Motif K-mer Z-score P-value
1817 rwucaag gcccaag 1.740 4.09e-02
Protein: SNRPA(Hs/Mm)
Sequence Position Motif K-mer Z-score P-value
998 wugcacr uugccca 3.648 1.32e-04
1023 wugcacr uugcacu 3.296 4.90e-04
Protein: SRSF1(Hs/Mm)
Sequence Position Motif K-mer Z-score P-value
352 crsmsgw cggagga 2.389 8.45e-03
353 gragga ggagga 1.957 2.52e-02
678 crsmsgw cggccgu 2.389 8.45e-03
748 gragga ggaggg 2.882 1.98e-03
752 gragga ggaggg 2.882 1.98e-03
1041 crsmsgw cacccga 2.389 8.45e-03
1283 gragga cgagga 2.516 5.93e-03
1286 gragga ggagga 2.903 1.85e-03
1289 gragga ggagaa 2.452 7.10e-03
1353 ugrwgvh uggaaga 1.944 2.59e-02
1354 ugrwgvh ggaagaa 1.944 2.59e-02
1363 ugrwgvh ucgagcu 1.944 2.59e-02
1369 ugrwgvh ugcugcc 1.944 2.59e-02
1476 ugrwgvh gggagcu 2.333 9.82e-03
1501 ugrwgvh uggagau 3.578 1.73e-04
1504 ugrwgvh agauggu 2.833 2.31e-03
1507 ugrwgvh uggugac 3.433 2.98e-04
1523 ugrwgvh gggagga 3.156 8.00e-04
1526 ugrwgvh aggagac 3.156 8.00e-04
1534 ugrwgvh uggugaa 2.733 3.14e-03
1537 ugrwgvh ugaacca 2.333 9.82e-03
1961 ugrwgvh uggagga 2.733 3.14e-03
1962 gragga ggagga 2.978 1.45e-03
1971 ugrwgvh agaagau 2.333 9.82e-03
1977 gragga ugagga 2.559 5.25e-03
1980 gragga ggaaga 2.634 4.22e-03
Protein: SRSF10(Hs/Mm)
Sequence Position Motif K-mer Z-score P-value
364 agagavm agagaaa 3.711 1.03e-04
384 agagavm agaggga 3.373 3.72e-04
394 agagavm aaagaaa 3.072 1.06e-03
396 agagavm agaaaau 2.795 2.60e-03
564 agagavm aaagaaa 2.386 8.52e-03
566 agagavm agaaaaa 2.398 8.24e-03
821 agagavm agaggca 2.265 1.18e-02
827 agagavm agaggga 2.253 1.21e-02
Protein: SRSF2(Hs/Mm)
Sequence Position Motif K-mer Z-score P-value
79 ugcygyy uuccucc 1.929 2.69e-02
80 ugcygyy uccuccu 1.929 2.69e-02
86 ugcygyy uuaugcc 1.929 2.69e-02
89 ugcygyy ugccucu 2.293 1.09e-02
100 ugcygyy uuccucc 1.929 2.69e-02
101 ugcygyy uccuccc 1.929 2.69e-02
225 ugcygyy ugcagcc 1.949 2.56e-02
265 ugcygyy ugcguuc 1.818 3.45e-02
283 ugcygyy ggcagcu 1.768 3.85e-02
286 ugcygyy agcuguu 2.313 1.04e-02
291 ugcygyy uuccgcc 1.859 3.15e-02
327 ugcygyy ugcgguu 1.859 3.15e-02
344 ugcygyy uacugcu 1.859 3.15e-02
352 ggagwd cggagg 2.724 3.22e-03
355 ggagwd aggagc 3.000 1.35e-03
361 ggagwd agcaga 2.736 3.11e-03
371 ggagwd gggaga 3.276 5.26e-04
644 ugcygyy agcugug 2.525 5.78e-03
649 ugcygyy ugcugcu 3.424 3.09e-04
652 ugcygyy ugcucgc 2.525 5.78e-03
656 ugcygyy cgcggcc 2.646 4.07e-03
659 gryymcyr ggccgcca 3.352 4.01e-04
662 gryymcyr cgccaccg 2.841 2.25e-03
665 ugcygyy caccgcc 2.667 3.83e-03
672 gryymcyr gggccccg 2.989 1.40e-03
673 gryymcyr ggccccgg 2.989 1.40e-03
679 ugcygyy ggccguc 2.939 1.65e-03
682 gryymcyr cgucccug 2.989 1.40e-03
688 ugcygyy uggcucc 2.162 1.53e-02
689 gryymcyr ggcucccc 2.523 5.82e-03
692 ugcygyy uccccuc 2.162 1.53e-02
697 ugcygyy uccugcc 2.707 3.39e-03
700 ugcygyy ugccucg 2.162 1.53e-02
928 ugcygyy cgccucu 1.818 3.45e-02
940 ugcygyy agcccuc 1.929 2.69e-02
945 ugcygyy ucccgcu 2.293 1.09e-02
948 ugcygyy cgcugau 1.929 2.69e-02
951 ugcygyy ugauccc 1.929 2.69e-02
964 ugcygyy agcgguc 2.111 1.74e-02
1082 ugcygyy uucugcc 2.646 4.07e-03
1085 ugcygyy ugcccau 2.253 1.21e-02
1104 ugcygyy ccccgcc 2.253 1.21e-02
1107 ugcygyy cgccgcu 2.889 1.93e-03
1110 ugcygyy cgcugcc 2.646 4.07e-03
1120 ugcygyy acccgcu 2.253 1.21e-02
1123 ugcygyy cgcuucu 2.323 1.01e-02
1136 ugcygyy ggcucuc 2.111 1.74e-02
1145 ugcygyy ugcagcu 2.646 4.07e-03
1148 ugcygyy agcugcu 2.535 5.62e-03
1156 ugcygyy agacgcu 1.768 3.85e-02
1189 ugcygyy agcagcc 1.818 3.45e-02
1192 ugcygyy agccucc 1.818 3.45e-02
1196 ugcygyy ucccgcg 1.818 3.45e-02
1204 ugcygyy cgaugcc 1.818 3.45e-02
1207 ugcygyy ugccccu 2.172 1.49e-02
1261 ugcygyy ugcagcc 2.172 1.49e-02
1264 ugcygyy agccgua 1.818 3.45e-02
1272 ugcygyy uucuacu 1.818 3.45e-02
1275 ugcygyy uacugcg 1.818 3.45e-02
1285 ggagwd aggagg 1.897 2.89e-02
1288 ggagwd aggaga 3.080 1.03e-03
1321 ugcygyy agcugca 1.818 3.45e-02
1324 ugcygyy ugcagcc 1.949 2.56e-02
1366 ugcygyy agcugcu 3.071 1.07e-03
1369 ugcygyy ugcugcc 3.424 3.09e-04
1372 ugcygyy ugcccac 2.646 4.07e-03
1378 ugcygyy ccccgcc 2.707 3.39e-03
1381 ugcygyy cgccccu 2.707 3.39e-03
1384 ugcygyy cccuguc 2.707 3.39e-03
1387 ugcygyy ugucccc 2.707 3.39e-03
1395 ugcygyy agccgcc 2.758 2.91e-03
1398 ugcygyy cgccgcu 2.747 3.01e-03
1410 ugcygyy cucugcu 2.253 1.21e-02
1413 ugcygyy ugcucgc 2.202 1.38e-02
1417 ugcygyy cgcccuc 2.202 1.38e-02
1430 ugcygyy ugcgguc 2.293 1.09e-02
1476 ggagwd gggagc 2.184 1.45e-02
1501 ggagwd uggaga 3.529 2.09e-04
1523 ggagwd gggagg 3.161 7.86e-04
1526 ggagwd aggaga 3.736 9.35e-05
1611 ugcygyy agcggcu 1.768 3.85e-02
1614 ugcygyy ggcuucu 1.768 3.85e-02
1622 ugcygyy ggccgcc 2.313 1.04e-02
1625 ugcygyy cgccgcc 2.535 5.62e-03
1648 ugcygyy agcuggc 1.929 2.69e-02
1851 ugcygyy uucucuc 1.929 2.69e-02
1855 ugcygyy cuccguc 1.818 3.45e-02
1870 ugcygyy cucugcu 1.929 2.69e-02
1873 ugcygyy ugcucuc 2.172 1.49e-02
1890 ugcygyy uccuccc 1.818 3.45e-02
1902 ugcygyy ggcagcc 1.818 3.45e-02
1912 ugcygyy agccccu 1.929 2.69e-02
1918 ugcygyy uggugcu 2.172 1.49e-02
1921 ugcygyy ugcucca 1.818 3.45e-02
1992 ugcygyy uguuguu 2.172 1.49e-02
1995 ugcygyy uguuucu 1.929 2.69e-02
1998 ugcygyy uucugug 1.929 2.69e-02
2016 ugcygyy ggcuccu 1.818 3.45e-02
Protein: SRSF3(Hs/Mm)
Sequence Position Motif K-mer Z-score P-value
29 wcwwc uauac 1.696 4.49e-02
59 wcwwc uaauc 1.824 3.41e-02
62 wcwwc ucauu 1.824 3.41e-02
66 wcwwc ucuag 1.824 3.41e-02
71 wcwwc gcauc 1.882 2.99e-02
73 cuckucy aucguuu 1.950 2.56e-02
76 cuckucy guuuucc 2.000 2.27e-02
77 wcwwc uuuuc 1.922 2.73e-02
79 cuckucy uuccucc 2.000 2.27e-02
80 wcwwc uccuc 1.922 2.73e-02
92 cuckucy cucuauc 2.000 2.27e-02
93 wcwwc ucuau 2.402 8.15e-03
97 wcwwc ucauu 2.647 4.06e-03
100 cuckucy uuccucc 1.950 2.56e-02
101 wcwwc uccuc 2.647 4.06e-03
110 wcwwc ucuac 3.353 4.00e-04
115 wcwwc acuaa 2.618 4.42e-03
119 wcwwc acauc 3.294 4.94e-04
132 wcwwc ugaac 2.618 4.42e-03
136 cuckucy cgcgcgc 1.660 4.85e-02
138 cuckucy cgcgccc 2.380 8.66e-03
148 wcwwc aauac 1.882 2.99e-02
152 cuckucy cccuucu 3.100 9.68e-04
153 wcwwc ccuuc 1.882 2.99e-02
154 cuckucy cuucuuu 1.860 3.14e-02
155 cuckucy uucuuuc 2.570 5.08e-03
156 wcwwc ucuuu 1.912 2.79e-02
157 cuckucy cuuuccu 2.570 5.08e-03
159 cuckucy uuccucc 2.570 5.08e-03
160 wcwwc uccuc 1.912 2.79e-02
162 cuckucy cuccacu 2.570 5.08e-03
163 wcwwc uccac 1.922 2.73e-02
164 cuckucy ccacucu 1.860 3.14e-02
165 cuckucy cacucuc 1.860 3.14e-02
167 cuckucy cucuccc 3.110 9.35e-04
168 wcwwc ucucc 1.922 2.73e-02
173 cuckucy cugggac 1.860 3.14e-02
179 cuckucy cucuuga 2.400 8.20e-03
180 wcwwc ucuug 1.882 2.99e-02
181 cuckucy cuugauc 1.680 4.65e-02
183 wcwwc ugauc 1.824 3.41e-02
186 wcwwc ucaaa 1.696 4.49e-02
192 cuckucy cgcggcc 2.370 8.89e-03
197 cuckucy cccuuuc 2.000 2.27e-02
198 cuckucy ccuuucc 2.000 2.27e-02
199 cuckucy cuuuccc 1.990 2.33e-02
288 cuckucy cuguucc 2.020 2.17e-02
320 wcwwc acaag 1.696 4.49e-02
336 wcwwc ucaaa 1.696 4.49e-02
342 wcwwc aguac 1.696 4.49e-02
345 wcwwc acugc 1.696 4.49e-02
423 wcwwc ucaug 2.186 1.44e-02
431 cuckucy cucucuu 2.220 1.32e-02
433 cuckucy cucuuac 2.580 4.94e-03
434 wcwwc ucuua 2.186 1.44e-02
439 cuckucy cucuguu 2.220 1.32e-02
441 cuckucy cuguuua 1.820 3.44e-02
444 wcwwc uuuac 2.186 1.44e-02
446 cuckucy uacaucc 1.820 3.44e-02
447 wcwwc acauc 2.431 7.53e-03
452 cuckucy cuagagc 1.840 3.29e-02
458 cuckucy cuagagu 1.840 3.29e-02
466 cuckucy cucggcu 3.020 1.26e-03
469 cuckucy ggcugcc 1.840 3.29e-02
474 cuckucy cccggcu 2.530 5.70e-03
480 cuckucy ugagucu 1.850 3.22e-02
483 cuckucy gucuccu 2.560 5.23e-03
485 cuckucy cuccucc 3.090 1.00e-03
486 cuckucy uccuccc 1.850 3.22e-02
488 cuckucy cucccca 1.860 3.14e-02
490 cuckucy ccccacc 1.860 3.14e-02
491 cuckucy cccaccu 1.860 3.14e-02
493 cuckucy caccuuc 1.670 4.75e-02
494 cuckucy accuucc 2.380 8.66e-03
495 cuckucy ccuuccc 1.670 4.75e-02
496 cuckucy cuucccc 1.670 4.75e-02
499 cuckucy ccccacc 1.670 4.75e-02
500 cuckucy cccaccc 1.660 4.85e-02
503 cuckucy acccucc 1.670 4.75e-02
504 cuckucy cccuccc 2.390 8.42e-03
506 cuckucy cucccca 1.680 4.65e-02
508 cuckucy ccccacc 1.680 4.65e-02
509 cuckucy cccaccc 1.670 4.75e-02
513 cuckucy cccuccc 2.000 2.27e-02
528 cuckucy ccccucc 1.950 2.56e-02
529 cuckucy cccuccc 1.950 2.56e-02
575 cuckucy auccucu 2.000 2.27e-02
578 cuckucy cucucuc 2.000 2.27e-02
580 cuckucy cucucgc 2.000 2.27e-02
586 cuckucy cuaaucu 2.000 2.27e-02
591 cuckucy cuccgcc 2.000 2.27e-02
646 cuckucy cugugcu 1.680 4.65e-02
656 cuckucy cgcggcc 1.950 2.56e-02
676 cuckucy cccggcc 2.030 2.12e-02
680 cuckucy gccgucc 2.030 2.12e-02
691 cuckucy cuccccu 2.020 2.17e-02
693 cuckucy ccccucc 2.030 2.12e-02
694 cuckucy cccuccu 2.030 2.12e-02
696 cuckucy cuccugc 2.030 2.12e-02
717 cuckucy ggcuucu 1.950 2.56e-02
926 cuckucy uucgccu 2.020 2.17e-02
928 cuckucy cgccucu 2.020 2.17e-02
931 cuckucy cucuggc 2.020 2.17e-02
933 cuckucy cuggccc 2.020 2.17e-02
942 cuckucy cccuccc 2.020 2.17e-02
950 cuckucy cugaucc 2.020 2.17e-02
972 wcwwc gcaac 1.696 4.49e-02
976 cuckucy cccuugc 1.860 3.14e-02
983 cuckucy cgcaucc 1.840 3.29e-02
995 wcwwc acuuu 1.696 4.49e-02
996 cuckucy cuuugcc 1.850 3.22e-02
1020 wcwwc acuuu 2.186 1.44e-02
1033 wcwwc acuua 1.941 2.61e-02
1037 wcwwc acaac 2.676 3.73e-03
1040 wcwwc acacc 2.186 1.44e-02
1055 cuckucy cgcgacu 2.360 9.14e-03
1057 cuckucy cgacucu 1.800 3.59e-02
1060 cuckucy cucuccc 2.980 1.44e-03
1061 wcwwc ucucc 2.186 1.44e-02
1064 cuckucy cccgacg 1.800 3.59e-02
1079 cuckucy cuauucu 3.240 5.98e-04
1080 wcwwc uauuc 1.941 2.61e-02
1082 cuckucy uucugcc 2.580 4.94e-03
1083 wcwwc ucugc 1.941 2.61e-02
1087 cuckucy cccauuu 1.810 3.51e-02
1099 cuckucy cacuucc 3.250 5.77e-04
1100 wcwwc acuuc 2.431 7.53e-03
1101 cuckucy cuucccc 1.940 2.62e-02
1104 cuckucy ccccgcc 1.940 2.62e-02
1105 cuckucy cccgccg 1.840 3.29e-02
1107 cuckucy cgccgcu 1.840 3.29e-02
1110 cuckucy cgcugcc 2.490 6.39e-03
1116 cuckucy caggacc 1.930 2.68e-02
1121 cuckucy cccgcuu 1.930 2.68e-02
1123 cuckucy cgcuucu 3.250 5.77e-04
1125 cuckucy cuucucu 2.490 6.39e-03
1128 cuckucy cucugaa 1.820 3.44e-02
1138 cuckucy cucuccu 2.930 1.69e-03
1140 cuckucy cuccuug 1.770 3.84e-02
1141 cuckucy uccuugc 1.770 3.84e-02
1148 cuckucy agcugcu 1.770 3.84e-02
1213 wcwwc ucaac 2.676 3.73e-03
1222 wcwwc gcuuc 2.373 8.82e-03
1225 wcwwc ucacc 2.647 4.06e-03
1228 wcwwc ccaac 2.657 3.94e-03
1237 wcwwc acuau 2.657 3.94e-03
1243 wcwwc accuc 2.402 8.15e-03
1245 cuckucy cucgacu 2.030 2.12e-02
1246 wcwwc ucgac 2.412 7.93e-03
1249 wcwwc acuac 3.392 3.47e-04
1252 wcwwc acgac 2.657 3.94e-03
1270 wcwwc auuuc 2.765 2.85e-03
1272 cuckucy uucuacu 1.860 3.14e-02
1273 wcwwc ucuac 3.745 9.02e-05
1276 wcwwc acugc 2.735 3.12e-03
1291 wcwwc agaac 2.676 3.73e-03
1293 cuckucy aacuucu 1.820 3.44e-02
1294 wcwwc acuuc 3.539 2.01e-04
1296 cuckucy uucuacc 1.690 4.55e-02
1297 wcwwc ucuac 3.412 3.22e-04
1379 cuckucy cccgccc 1.860 3.14e-02
1385 cuckucy ccugucc 2.310 1.04e-02
1386 cuckucy cuguccc 2.310 1.04e-02
1391 cuckucy cccuagc 1.840 3.29e-02
1393 cuckucy cuagccg 1.840 3.29e-02
1398 cuckucy cgccgcu 1.860 3.14e-02
1400 cuckucy ccgcucc 1.860 3.14e-02
1401 cuckucy cgcuccg 1.860 3.14e-02
1405 cuckucy ccgggcu 1.850 3.22e-02
1410 cuckucy cucugcu 3.090 1.00e-03
1412 cuckucy cugcucg 1.820 3.44e-02
1415 cuckucy cucgccc 3.250 5.77e-04
1418 cuckucy gcccucc 1.950 2.56e-02
1419 cuckucy cccuccu 2.660 3.91e-03
1421 cuckucy cuccuac 2.660 3.91e-03
1423 wcwwc ccuac 1.824 3.41e-02
1436 cuckucy cacaccc 1.860 3.14e-02
1437 wcwwc acacc 2.373 8.82e-03
1440 cuckucy cccuucu 3.100 9.68e-04
1441 wcwwc ccuuc 2.373 8.82e-03
1442 cuckucy cuucucc 2.370 8.89e-03
1443 cuckucy uucuccc 2.370 8.89e-03
1444 wcwwc ucucc 2.373 8.82e-03
1447 cuckucy cccuucg 2.220 1.32e-02
1448 wcwwc ccuuc 2.373 8.82e-03
1459 wcwwc acaac 2.892 1.91e-03
1462 wcwwc acgac 2.412 7.93e-03
1479 cuckucy agcuucu 1.780 3.75e-02
1480 wcwwc gcuuc 2.186 1.44e-02
1481 cuckucy cuucucc 1.780 3.75e-02
1483 wcwwc ucucc 2.186 1.44e-02
1487 cuckucy cacggcc 1.780 3.75e-02
1531 wcwwc acaug 1.941 2.61e-02
1537 wcwwc ugaac 1.941 2.61e-02
1549 wcwwc ucauc 2.794 2.60e-03
1552 wcwwc ucugc 2.618 4.42e-03
1564 wcwwc acgac 2.843 2.23e-03
1573 wcwwc ccuuc 2.882 1.98e-03
1576 wcwwc ucauc 3.765 8.33e-05
1579 wcwwc ucaaa 2.833 2.31e-03
1582 wcwwc aaaac 2.833 2.31e-03
1585 wcwwc acauc 3.745 9.02e-05
1588 wcwwc ucauc 3.745 9.02e-05
1590 cuckucy aucaucc 1.660 4.85e-02
1591 wcwwc ucauc 3.745 9.02e-05
1611 cuckucy agcggcu 2.170 1.50e-02
1614 cuckucy ggcuucu 2.820 2.40e-03
1616 cuckucy cuucucg 2.090 1.83e-02
1619 cuckucy cucggcc 3.250 5.77e-04
1625 cuckucy cgccgcc 2.130 1.66e-02
1635 cuckucy cucgucu 3.780 7.84e-05
1650 cuckucy cuggccu 2.560 5.23e-03
1652 cuckucy ggccucc 1.910 2.81e-02
1653 cuckucy gccuccu 1.910 2.81e-02
1655 cuckucy cuccuac 2.530 5.70e-03
1656 cuckucy uccuacc 1.910 2.81e-02
1695 cuckucy cccgccc 2.000 2.27e-02
1701 cuckucy cgcggcc 2.030 2.12e-02
1708 wcwwc acagc 1.696 4.49e-02
1710 cuckucy agcgucu 2.040 2.07e-02
1713 cuckucy gucugcu 2.040 2.07e-02
1714 wcwwc ucugc 1.696 4.49e-02
1715 cuckucy cugcucc 2.040 2.07e-02
1718 cuckucy cuccacc 2.040 2.07e-02
1719 wcwwc uccac 1.696 4.49e-02
1721 cuckucy caccucc 2.030 2.12e-02
1722 wcwwc accuc 1.696 4.49e-02
1730 cuckucy cuuguac 2.020 2.17e-02
1732 wcwwc uguac 1.696 4.49e-02
1768 wcwwc gcauc 1.941 2.61e-02
1770 cuckucy aucgacc 2.310 1.04e-02
1771 wcwwc ucgac 1.941 2.61e-02
1782 cuckucy guggucu 2.310 1.04e-02
1785 cuckucy gucuucc 2.670 3.79e-03
1786 wcwwc ucuuc 3.353 4.00e-04
1790 cuckucy ccccuac 1.840 3.29e-02
1791 cuckucy cccuacc 2.530 5.70e-03
1792 wcwwc ccuac 2.618 4.42e-03
1793 cuckucy cuacccu 1.840 3.29e-02
1795 cuckucy acccucu 1.850 3.22e-02
1796 cuckucy cccucuc 1.840 3.29e-02
1798 cuckucy cucucaa 1.840 3.29e-02
1800 cuckucy cucaacg 1.840 3.29e-02
1801 wcwwc ucaac 3.167 7.70e-04
1804 wcwwc acgac 2.431 7.53e-03
1807 wcwwc acagc 2.431 7.53e-03
1814 cuckucy cucgccc 2.580 4.94e-03
1820 cuckucy caagucc 2.040 2.07e-02
1829 cuckucy cgccucg 1.660 4.85e-02
1832 cuckucy cucgcaa 1.670 4.75e-02
1836 cuckucy caagacu 1.670 4.75e-02
1845 cuckucy agcgccu 1.680 4.65e-02
1847 cuckucy cgccuuc 1.680 4.65e-02
1848 cuckucy gccuucu 2.390 8.42e-03
1849 wcwwc ccuuc 1.696 4.49e-02
1850 cuckucy cuucucu 2.570 5.08e-03
1851 cuckucy uucucuc 1.860 3.14e-02
1853 cuckucy cucuccg 2.580 4.94e-03
1854 wcwwc ucucc 1.882 2.99e-02
1855 cuckucy cuccguc 1.860 3.14e-02
1856 cuckucy uccgucc 2.580 4.94e-03
1857 cuckucy ccguccu 1.860 3.14e-02
1859 cuckucy guccucg 1.860 3.14e-02
1860 wcwwc uccuc 1.912 2.79e-02
1862 cuckucy cucggau 2.580 4.94e-03
1865 cuckucy ggauucu 1.860 3.14e-02
1867 cuckucy auucucu 1.860 3.14e-02
1870 cuckucy cucugcu 3.110 9.35e-04
1871 wcwwc ucugc 1.912 2.79e-02
1872 cuckucy cugcucu 2.580 4.94e-03
1875 cuckucy cucuccu 3.110 9.35e-04
1876 wcwwc ucucc 1.882 2.99e-02
1877 cuckucy cuccucg 2.580 4.94e-03
1878 wcwwc uccuc 1.882 2.99e-02
1880 cuckucy cucgacg 2.570 5.08e-03
1881 wcwwc ucgac 1.824 3.41e-02
1886 cuckucy ggagucc 1.860 3.14e-02
1889 cuckucy guccucc 2.560 5.23e-03
1890 cuckucy uccuccc 1.850 3.22e-02
1892 cuckucy cuccccg 1.860 3.14e-02
Protein: SRSF5(Hs/Mm)
Sequence Position Motif K-mer Z-score P-value
45 yywcwsg uugcugg 1.882 2.99e-02
111 yywcwsg cuacacu 2.323 1.01e-02
122 yywcwsg ucccacg 2.312 1.04e-02
164 yywcwsg ccacucu 2.323 1.01e-02
170 yywcwsg ucccugg 2.323 1.01e-02
313 yywcwsg ucacagg 2.591 4.78e-03
436 yywcwsg uuacucu 1.935 2.65e-02
530 yywcwsg ccucccg 1.935 2.65e-02
577 yywcwsg ccucucu 2.785 2.68e-03
579 yywcwsg ucucucg 3.172 7.57e-04
597 yywcwsg ccaccgg 2.839 2.26e-03
651 yywcwsg cugcucg 1.699 4.47e-02
684 yywcwsg ucccugg 1.914 2.78e-02
719 yywcwsg cuucuca 2.484 6.50e-03
721 yywcwsg ucucaga 2.462 6.91e-03
723 yywcwsg ucagagg 2.398 8.24e-03
782 yywcwsg uuucggg 2.269 1.16e-02
797 yywcwsg uaacucg 2.312 1.04e-02
930 yywcwsg ccucugg 2.613 4.49e-03
943 yywcwsg ccucccg 2.591 4.78e-03
1025 yywcwsg gcacugg 1.828 3.38e-02
1061 yywcwsg ucucccg 1.925 2.71e-02
1125 yywcwsg cuucucu 2.323 1.01e-02
1127 yywcwsg ucucuga 2.312 1.04e-02
1154 yywcwsg uuagacg 2.516 5.93e-03
1168 yywcwsg uuuuucg 2.462 6.91e-03
1170 yywcwsg uuucggg 2.559 5.25e-03
1194 yywcwsg ccucccg 2.301 1.07e-02
1223 yywcwsg cuucacc 2.086 1.85e-02
1229 yywcwsg caacagg 2.398 8.24e-03
1253 yywcwsg cgacucg 2.043 2.05e-02
1274 yywcwsg cuacugc 2.086 1.85e-02
1412 yywcwsg cugcucg 2.312 1.04e-02
1435 yywcwsg ucacacc 2.581 4.93e-03
1442 yywcwsg cuucucc 2.462 6.91e-03
1449 yywcwsg cuucggg 2.398 8.24e-03
1481 yywcwsg cuucucc 1.849 3.22e-02
1484 yywcwsg cuccacg 1.849 3.22e-02
1616 yywcwsg cuucucg 3.032 1.21e-03
1639 yywcwsg ucucaga 2.656 3.95e-03
1706 yywcwsg ccacagc 1.882 2.99e-02
1737 yywcwsg cugcagg 2.312 1.04e-02
1759 yywcwsg ccucaga 2.462 6.91e-03
1775 yywcwsg ccccucg 2.516 5.93e-03
1797 yywcwsg ccucuca 2.323 1.01e-02
1850 yywcwsg cuucucu 2.516 5.93e-03
1852 yywcwsg ucucucc 2.613 4.49e-03
1869 yywcwsg ucucugc 2.613 4.49e-03
1877 yywcwsg cuccucg 2.613 4.49e-03
1896 yywcwsg ccgcagg 2.484 6.50e-03
1914 yywcwsg ccccugg 2.204 1.38e-02
Protein: SRSF6(Hs/Mm)
Sequence Position Motif K-mer Z-score P-value
426 yrcrkm ugcggc 2.596 4.72e-03
Protein: SRSF7(Hs/Mm)
Sequence Position Motif K-mer Z-score P-value
317 wggacra aggacaa 2.723 3.23e-03
626 acgacg gacggc 1.769 3.84e-02
633 acgacg gaggac 1.769 3.84e-02
1036 acgacg uacaac 2.282 1.12e-02
1050 acgacg aaggac 2.936 1.66e-03
1055 acgacg cgcgac 3.090 1.00e-03
1064 acgacg cccgac 2.577 4.98e-03
1180 wggacra uggaaaa 1.957 2.52e-02
1202 acgacg gacgau 1.692 4.53e-02
1239 acgacg uaugac 3.295 4.92e-04
1245 acgacg cucgac 3.551 1.92e-04
1248 acgacg gacuac 3.667 1.23e-04
1251 acgacg uacgac 3.962 3.72e-05
1281 acgacg gacgag 1.692 4.53e-02
1285 wggacra aggagga 2.819 2.41e-03
1288 wggacra aggagaa 2.819 2.41e-03
1458 acgacg gacaac 3.705 1.06e-04
1461 acgacg aacgac 4.038 2.70e-05
1464 acgacg gacggc 3.987 3.35e-05
1474 acgagagay gcgggagcu 2.375 8.77e-03
1487 acgacg cacggc 3.077 1.05e-03
1488 acgagagay acggccgac 1.850 3.22e-02
1491 acgacg gccgac 2.782 2.70e-03
1499 acgagagay gcuggagau 1.850 3.22e-02
1526 acgagagay aggagacau 1.850 3.22e-02
1540 acgagagay accagaguu 1.850 3.22e-02
1554 acgacg ugcgac 3.256 5.65e-04
1561 wggacra cggacga 2.340 9.64e-03
1563 acgacg gacgac 3.897 4.87e-05
1566 acgacg gacgag 3.372 3.73e-04
1770 acgacg aucgac 2.269 1.16e-02
1943 acgacg caccac 2.705 3.42e-03
1953 acgacg agcgac 2.897 1.88e-03
1961 wggacra uggagga 3.234 6.10e-04
1979 wggacra aggaaga 3.447 2.83e-04
2003 wggacra uggaaaa 2.340 9.64e-03
Protein: SRSF9(Hs/Mm)
Sequence Position Motif K-mer Z-score P-value
355 akgavmr aggagca 2.154 1.56e-02
358 akgavmr agcagca 1.692 4.53e-02
387 kgrwgsm gggagca 2.127 1.67e-02
748 kgrwgsm ggaggga 2.986 1.41e-03
751 kgrwgsm gggaggg 2.775 2.76e-03
752 kgrwgsm ggaggga 2.986 1.41e-03
1285 akgavmr aggagga 3.831 6.38e-05
1288 akgavmr aggagaa 3.985 3.37e-05
1303 akgavmr agcagca 3.662 1.25e-04
1306 akgavmr agcagca 3.662 1.25e-04
1309 akgavmr agcagca 3.538 2.02e-04
1930 akgavmr aggagac 1.985 2.36e-02
1961 kgrwgsm uggagga 2.268 1.17e-02
1964 akgavmr aggaaca 3.338 4.22e-04
1979 akgavmr aggaaga 2.477 6.62e-03
1980 kgrwgsm ggaagaa 2.296 1.08e-02
Protein: TARDBP(Hs/Mm)
Sequence Position Motif K-mer Z-score P-value
252 ugugug gguggg 2.009 2.23e-02
254 ugugug ugggcg 2.009 2.23e-02
263 ugugug agugcg 2.009 2.23e-02
265 ugugug ugcguu 2.009 2.23e-02
272 ugugug ucggug 2.000 2.27e-02
274 ugugug ggugug 2.385 8.54e-03
276 ugugug ugugga 2.000 2.27e-02
1602 ugugug uguaug 2.550 5.39e-03
1604 ugugug uaugug 2.550 5.39e-03
1606 ugugug ugugga 1.972 2.43e-02
1995 ugugug uguuuc 1.908 2.82e-02
1997 ugugug uuucug 1.908 2.82e-02
1999 ugugug ucugug 2.294 1.09e-02
2001 ugugug ugugga 1.908 2.82e-02
Protein: TIA1(Hs/Mm)
Sequence Position Motif K-mer Z-score P-value
53 uuuuubk uuauuuu 2.147 1.59e-02
54 uuuuubk uauuuua 2.088 1.84e-02
780 uuuuubk guuuucg 1.784 3.72e-02
781 uuuuubk uuuucgg 1.686 4.59e-02
1165 uuuuubk auuuuuu 3.108 9.42e-04
1166 uuuuubk uuuuuuu 3.431 3.01e-04
1167 uuuuubk uuuuuuc 3.353 4.00e-04
1168 uuuuubk uuuuucg 3.412 3.22e-04
1169 uuuuubk uuuucgg 2.824 2.37e-03
1994 uuuuubk uuguuuc 1.765 3.88e-02
Protein: TRA2A(Hs/Mm)
Sequence Position Motif K-mer Z-score P-value
362 gaagaggaag gcagagaaag 1.739 4.10e-02
825 gaagaggaag gcagagggag 1.739 4.10e-02
1281 gaagaggaag gacgaggagg 1.739 4.10e-02
1963 gaagaggaag gaggaacaag 3.728 9.65e-05
1966 gaagaggaag gaacaagaag 4.207 1.29e-05
1969 gaagaggaag caagaagaug 3.728 9.65e-05
1972 gaagaggaag gaagaugagg 4.207 1.29e-05
1975 gaagaggaag gaugaggaag 4.478 3.77e-06
1978 gaagaggaag gaggaagaaa 3.728 9.65e-05
Protein: TRA2B(Hs/Mm)
Sequence Position Motif K-mer Z-score P-value
26 aaguguu aaguaua 2.200 1.39e-02
40 aaguguu augcguu 2.200 1.39e-02
286 aaguguu agcuguu 1.726 4.22e-02
375 aaguguu gaggguu 2.105 1.76e-02
399 aaguguu aaauggu 2.105 1.76e-02
461 aaguguu gagugcu 1.726 4.22e-02
1963 gaagaa gaggaa 3.277 5.25e-04
1966 gaagaa gaacaa 3.277 5.25e-04
1969 gaagaa caagaa 3.277 5.25e-04
1972 gaagaa gaagau 3.277 5.25e-04
1978 gaagaa gaggaa 3.277 5.25e-04
1981 gaagaa gaagaa 3.652 1.30e-04
Protein: TUT1(Hs/Mm)
Sequence Position Motif K-mer Z-score P-value
584 mrauacu cgcuaau 1.984 2.36e-02
Protein: U2AF2(Hs/Mm)
Sequence Position Motif K-mer Z-score P-value
53 uuuuuyc uuauuuu 2.324 1.01e-02
75 uuuuuyc cguuuuc 2.324 1.01e-02
76 uuuuuyc guuuucc 2.514 5.97e-03
155 uuuuuyc uucuuuc 1.905 2.84e-02
156 uuuuuyc ucuuucc 1.790 3.67e-02
1165 uuuuuyc auuuuuu 2.905 1.84e-03
1166 uuuuuyc uuuuuuu 3.190 7.11e-04
1167 uuuuuyc uuuuuuc 3.371 3.74e-04
1168 uuuuuyc uuuuucg 2.952 1.58e-03
Protein: YBX1(Hs/Mm)
Sequence Position Motif K-mer Z-score P-value
1226 caaccacaa caccaacag 1.954 2.54e-02
1227 aacaucd accaaca 2.610 4.53e-03
1229 caaccacaa caacaggaa 1.954 2.54e-02
1247 caaccacaa cgacuacga 1.954 2.54e-02
1293 aacaucd aacuucu 3.117 9.14e-04
1300 aacaucd accagca 3.130 8.74e-04
1303 aacaucd agcagca 2.987 1.41e-03
1306 aacaucd agcagca 2.987 1.41e-03
1309 aacaucd agcagca 2.987 1.41e-03
1572 aacaucd accuuca 3.922 4.39e-05
1575 aacaucd uucauca 3.805 7.09e-05
1577 caaccacaa caucaaaaa 1.954 2.54e-02
1580 caaccacaa caaaaacau 1.954 2.54e-02
1584 aacaucd aacauca 4.818 7.25e-07
1587 aacaucd aucauca 4.468 3.95e-06
1590 aacaucd aucaucc 4.130 1.81e-05
1592 caaccacaa cauccagga 1.954 2.54e-02
1685 caaccacaa cagcccgaa 1.954 2.54e-02
1703 caaccacaa cggccacag 1.954 2.54e-02
1806 aacaucd gacagca 2.234 1.27e-02
1939 caaccacaa cgcccacca 2.276 1.14e-02
1942 caaccacaa ccaccacca 3.080 1.03e-03
1944 aacaucd accacca 3.221 6.39e-04
1945 caaccacaa ccaccagca 2.759 2.90e-03
1947 aacaucd accagca 3.143 8.36e-04
1966 caaccacaa gaacaagaa 2.276 1.14e-02
Protein: YBX2(Hs/Mm)
Sequence Position Motif K-mer Z-score P-value
1186 aacawcd accagca 1.770 3.84e-02
1293 aacawcd aacuucu 2.838 2.27e-03
1300 aacawcd accagca 2.716 3.30e-03
1303 aacawcd agcagca 2.797 2.58e-03
1306 aacawcd agcagca 2.797 2.58e-03
1309 aacawcd agcagca 2.797 2.58e-03
1581 aacawcd aaaaaca 3.378 3.65e-04
1584 aacawcd aacauca 3.743 9.09e-05
1587 aacawcd aucauca 3.297 4.89e-04
1590 aacawcd aucaucc 3.108 9.42e-04
1803 aacawcd aacgaca 2.203 1.38e-02
1806 aacawcd gacagca 2.095 1.81e-02
1809 aacawcd agcagcu 2.068 1.93e-02
1947 aacawcd accagca 2.743 3.04e-03
1950 aacawcd agcagcg 2.770 2.80e-03
1967 aacawcd aacaaga 2.649 4.04e-03
Protein: ZC3H10(Hs/Mm)
Sequence Position Motif K-mer Z-score P-value
216 ssagcgm gaggcgc 1.918 2.76e-02
256 ssagcgm ggcgcgc 2.274 1.15e-02
261 ssagcgm gcagugc 2.795 2.60e-03
815 ssagcgm ccagcga 3.384 3.57e-04
831 ssagcgm ggagcga 3.342 4.16e-04
835 ssagcgm cgagcgg 3.315 4.58e-04
872 ssagcgm gcagagc 2.918 1.76e-03
877 ssagcgm gcugcgc 3.000 1.35e-03
882 ssagcgm gcugcgg 2.712 3.34e-03
938 ssagcgm ccagccc 2.260 1.19e-02
962 ssagcgm ccagcgg 2.466 6.83e-03
1313 ssagcgm gcagagc 3.397 3.41e-04
1315 ssagcgm agagcga 3.493 2.39e-04
1325 ssagcgm gcagccc 3.685 1.14e-04
1332 ssagcgm ccggcgc 3.534 2.05e-04
1339 ssagcgm ccagcga 3.329 4.36e-04
1665 ssagcgm gcugcgc 3.137 8.53e-04
1678 ssagcgm acagcgg 3.329 4.36e-04
1684 ssagcgm gcagccc 3.521 2.15e-04
1708 ssagcgm acagcgu 2.438 7.38e-03
1825 ssagcgm ccugcgc 2.712 3.34e-03
1843 ssagcgm ccagcgc 2.014 2.20e-02
1898 ssagcgm gcagggc 2.342 9.59e-03
1903 ssagcgm gcagccc 2.384 8.56e-03
1951 ssagcgm gcagcga 1.740 4.09e-02
Protein: ZC3H14(Hs/Mm)
Sequence Position Motif K-mer Z-score P-value
52 uuuduuu guuauuu 1.876 3.03e-02
53 uuuduuu uuauuuu 1.918 2.76e-02
1165 uuuduuu auuuuuu 2.134 1.64e-02
1166 uuuduuu uuuuuuu 2.454 7.06e-03
1167 uuuduuu uuuuuuc 2.144 1.60e-02

## Sheet: myc-207
Predictions for sequence: sequence1
Calculation parameters:
Genome: Human (hg38)
Selected motifs: All Human/Mouse motifs
Stringency level: Medium
Conservation filter: Off
======================================================================================================================
Protein: A1CF(Hs/Mm)
Sequence Position Motif K-mer Z-score P-value
2103 wuaauur guauuua 1.911 2.80e-02
2110 wuaauur agaauug 2.100 1.79e-02
2124 wuaauur aaaauuu 1.933 2.66e-02
2154 wuaauur guaaaua 2.344 9.54e-03
2167 wuaauur uuaaaug 2.844 2.23e-03
2173 wuaauur guaaaua 2.611 4.51e-03
2177 wuaauur auaacuu 2.633 4.23e-03
2183 wuaauur uuaauaa 2.567 5.13e-03
2260 wuaauur cuaauuu 2.889 1.93e-03
2269 wuaauur uuuauuu 2.544 5.48e-03
2270 wuaauur uuauuua 2.733 3.14e-03
2274 wuaauur uuaagua 2.944 1.62e-03
Protein: ANKHD1(Hs/Mm)
Sequence Position Motif K-mer Z-score P-value
629 agacgww agccgua 1.652 4.93e-02
927 agacgww ggacgac 2.478 6.61e-03
930 agacgww cgacgag 2.507 6.09e-03
935 agacgww agaccuu 2.725 3.22e-03
1338 agacgww agaagau 2.087 1.84e-02
1837 agacgww cgacgag 2.043 2.05e-02
Protein: BRUNOL4(Hs/Mm)
Sequence Position Motif K-mer Z-score P-value
1362 kgugukk uguuucu 2.297 1.08e-02
1366 kgugukk ucugugg 2.365 9.02e-03
2100 kgugukk uuuguau 2.811 2.47e-03
2102 kgugukk uguauuu 2.905 1.84e-03
2115 kgugukk uguuuuu 2.568 5.11e-03
2313 kgugukk uguuuuu 1.865 3.11e-02
Protein: BRUNOL5(Hs/Mm)
Sequence Position Motif K-mer Z-score P-value
1362 ugugukk uguuucu 1.950 2.56e-02
1366 ugugukk ucugugg 1.938 2.63e-02
2100 ugugukk uuuguau 1.925 2.71e-02
2102 ugugukk uguauuu 2.100 1.79e-02
2115 ugugukk uguuuuu 2.188 1.43e-02
Protein: BRUNOL6(Hs/Mm)
Sequence Position Motif K-mer Z-score P-value
1366 ugugdkg ucugugg 1.800 3.59e-02
Protein: CNOT4(Hs/Mm)
Sequence Position Motif K-mer Z-score P-value
1552 gacaga gacagu 3.435 2.96e-04
1558 gacaga gucaga 3.435 2.96e-04
1571 gacaga gacaga 3.880 5.22e-05
1641 gacaga aacaca 2.565 5.16e-03
1643 gacaga cacaca 2.228 1.29e-02
1661 gacaga gccaga 2.337 9.72e-03
1853 gacaga aacaca 1.870 3.07e-02
1855 gacaga cacaaa 1.848 3.23e-02
2207 gacaga cacaga 1.696 4.49e-02
Protein: CPEB2(Hs/Mm)
Sequence Position Motif K-mer Z-score P-value
529 chuuuuu gauuuuu 2.673 3.76e-03
530 chuuuuu auuuuuu 2.796 2.59e-03
531 chuuuuu uuuuuuu 2.837 2.28e-03
532 chuuuuu uuuuuuc 2.439 7.36e-03
1688 chuuuuu gcuuuuu 2.398 8.24e-03
1689 chuuuuu cuuuuuu 2.776 2.75e-03
1690 chuuuuu uuuuuug 2.337 9.72e-03
1809 chuuuuu cauuucu 1.673 4.72e-02
2060 chuuuuu acuuuuu 3.531 2.07e-04
2061 chuuuuu cuuuuuu 4.163 1.57e-05
2062 chuuuuu uuuuuua 3.306 4.73e-04
2076 chuuuuu caucuuu 3.429 3.03e-04
2077 chuuuuu aucuuuu 3.224 6.32e-04
2078 chuuuuu ucuuuuu 3.602 1.58e-04
2079 chuuuuu cuuuuuu 4.163 1.57e-05
2080 chuuuuu uuuuuuu 3.806 7.06e-05
2081 chuuuuu uuuuuuu 3.806 7.06e-05
2082 chuuuuu uuuuuuu 3.806 7.06e-05
2083 chuuuuu uuuuuuu 3.806 7.06e-05
2084 chuuuuu uuuuuuc 3.306 4.73e-04
2114 chuuuuu uuguuuu 2.194 1.41e-02
2115 chuuuuu uguuuuu 2.296 1.08e-02
2116 chuuuuu guuuuua 2.184 1.45e-02
2262 chuuuuu aauuuuu 3.173 7.54e-04
2263 chuuuuu auuuuuu 3.347 4.08e-04
2264 chuuuuu uuuuuuu 3.418 3.15e-04
2265 chuuuuu uuuuuuu 3.418 3.15e-04
2266 chuuuuu uuuuuua 2.929 1.70e-03
2281 chuuuuu cauuuug 3.398 3.39e-04
2287 chuuuuu gcuuuuu 3.163 7.81e-04
2288 chuuuuu cuuuuua 3.418 3.15e-04
2300 chuuuuu gauuuuu 3.173 7.54e-04
2301 chuuuuu auuuuuu 3.327 4.39e-04
2302 chuuuuu uuuuuuu 3.378 3.65e-04
2303 chuuuuu uuuuuuc 2.918 1.76e-03
2312 chuuuuu uuguuuu 2.827 2.35e-03
2313 chuuuuu uguuuuu 3.031 1.22e-03
2314 chuuuuu guuuuua 2.755 2.93e-03
Protein: CPEB4(Hs/Mm)
Sequence Position Motif K-mer Z-score P-value
529 uuuuuu gauuuu 2.713 3.33e-03
530 uuuuuu auuuuu 3.165 7.75e-04
531 uuuuuu uuuuuu 3.183 7.29e-04
532 uuuuuu uuuuuu 3.183 7.29e-04
533 uuuuuu uuuuuc 2.617 4.44e-03
1688 uuuuuu gcuuuu 2.548 5.42e-03
1689 uuuuuu cuuuuu 3.043 1.17e-03
1690 uuuuuu uuuuuu 2.957 1.55e-03
1691 uuuuuu uuuuug 2.513 5.99e-03
2060 uuuuuu acuuuu 3.104 9.55e-04
2061 uuuuuu cuuuuu 3.783 7.75e-05
2062 uuuuuu uuuuuu 3.652 1.30e-04
2063 uuuuuu uuuuua 3.009 1.31e-03
2078 uuuuuu ucuuuu 3.130 8.74e-04
2079 uuuuuu cuuuuu 3.783 7.75e-05
2080 uuuuuu uuuuuu 3.652 1.30e-04
2081 uuuuuu uuuuuu 3.652 1.30e-04
2082 uuuuuu uuuuuu 3.652 1.30e-04
2083 uuuuuu uuuuuu 3.652 1.30e-04
2084 uuuuuu uuuuuu 3.652 1.30e-04
2085 uuuuuu uuuuuc 3.009 1.31e-03
2115 uuuuuu uguuuu 2.609 4.54e-03
2116 uuuuuu guuuuu 2.896 1.89e-03
2117 uuuuuu uuuuua 2.557 5.28e-03
2126 uuuuuu aauuuu 2.643 4.11e-03
2127 uuuuuu auuuua 2.530 5.70e-03
2262 uuuuuu aauuuu 2.948 1.60e-03
2263 uuuuuu auuuuu 3.548 1.94e-04
2264 uuuuuu uuuuuu 3.583 1.70e-04
2265 uuuuuu uuuuuu 3.583 1.70e-04
2266 uuuuuu uuuuuu 3.583 1.70e-04
2267 uuuuuu uuuuua 2.948 1.60e-03
2281 uuuuuu cauuuu 3.270 5.38e-04
2282 uuuuuu auuuug 2.991 1.39e-03
2287 uuuuuu gcuuuu 3.052 1.14e-03
2288 uuuuuu cuuuuu 3.696 1.10e-04
2289 uuuuuu uuuuua 2.965 1.51e-03
2300 uuuuuu gauuuu 3.043 1.17e-03
2301 uuuuuu auuuuu 3.548 1.94e-04
2302 uuuuuu uuuuuu 3.574 1.76e-04
2303 uuuuuu uuuuuu 3.574 1.76e-04
2304 uuuuuu uuuuuc 2.948 1.60e-03
2313 uuuuuu uguuuu 3.009 1.31e-03
2314 uuuuuu guuuuu 3.409 3.26e-04
2315 uuuuuu uuuuua 2.835 2.29e-03
Protein: CUG-BP(Hs/Mm)
Sequence Position Motif K-mer Z-score P-value
33 ugcug cgccg 1.699 4.47e-02
241 ugcug agcug 2.133 1.65e-02
246 ugcug cgcug 2.115 1.72e-02
249 ugcug ugcgg 2.133 1.65e-02
257 ugcug uccug 2.115 1.72e-02
510 ugcug ugcag 2.142 1.61e-02
513 ugcug agcug 2.150 1.58e-02
516 ugcug ugcuu 2.142 1.61e-02
524 ugcug cgcug 2.133 1.65e-02
626 ugcug ugcag 1.743 4.07e-02
640 ugcug uacug 1.779 3.76e-02
686 ugcug agcug 1.779 3.76e-02
689 ugcug ugcag 1.743 4.07e-02
731 ugcug agcug 2.097 1.80e-02
734 ugcug ugcug 2.540 5.54e-03
778 ugcug ugcuc 1.814 3.48e-02
795 ugcug ugcgg 1.805 3.55e-02
863 ugcug agcug 2.593 4.76e-03
866 ugcug uggag 1.761 3.91e-02
869 ugcug agaug 1.761 3.91e-02
872 ugcug uggug 2.575 5.01e-03
881 ugcug agcug 2.611 4.51e-03
884 ugcug ugcug 3.053 1.13e-03
899 ugcug uggug 2.319 1.02e-02
1013 ugcug agcug 1.743 4.07e-02
1029 ugcug ggcug 1.743 4.07e-02
1081 ugcug ugcuc 1.779 3.76e-02
1103 ugcug ugcag 1.814 3.48e-02
1283 ugcug uggug 1.743 4.07e-02
1286 ugcug ugcuc 1.743 4.07e-02
1359 ugcug uguug 1.814 3.48e-02
1365 ugcug uucug 2.035 2.09e-02
1386 ugcug uccug 1.779 3.76e-02
1404 ugcug gucug 1.673 4.72e-02
1416 ugcug uucug 2.097 1.80e-02
1419 ugcug ugcug 2.540 5.54e-03
1527 ugcug uccug 1.929 2.69e-02
1530 ugcug ugcug 2.372 8.85e-03
1812 ugcug uucug 1.965 2.47e-02
1826 ugcug uguug 1.965 2.47e-02
1829 ugcug ugcgg 1.965 2.47e-02
Protein: DAZAP1(Hs/Mm)
Sequence Position Motif K-mer Z-score P-value
172 uagkwwr uaguaau 1.687 4.58e-02
260 uagkwwr ugggaag 1.910 2.81e-02
283 uagkwwr uaggggg 2.045 2.04e-02
1744 uagkwwr aagguag 2.507 6.09e-03
2226 uagkwwr uauauag 2.806 2.51e-03
2245 uagkwwr uagguac 3.299 4.85e-04
Protein: ENOX1(Hs/Mm)
Sequence Position Motif K-mer Z-score P-value
1550 hrkacag uggacag 1.844 3.26e-02
1569 hrkacag gagacag 2.000 2.27e-02
1842 hrkacag agaacag 1.891 2.93e-02
Protein: ESRP2(Hs/Mm)
Sequence Position Motif K-mer Z-score P-value
260 ugggrad ugggaag 2.237 1.26e-02
458 ugggrad uggggac 1.882 2.99e-02
866 ugggrad uggagau 2.158 1.55e-02
887 ugggrad ugggagg 2.513 5.99e-03
1344 ugggrad ugaggaa 1.934 2.66e-02
Protein: FMR1(Hs/Mm)
Sequence Position Motif K-mer Z-score P-value
461 kgacarg ggacacu 2.014 2.20e-02
483 kgacarg ggacccg 2.514 5.97e-03
1533 kgacarg ugccaag 2.708 3.38e-03
1542 kgacarg ggucaag 2.986 1.41e-03
1551 kgacarg ggacagu 3.083 1.02e-03
1821 kgacarg ggacuug 2.097 1.80e-02
1837 kgacarg cgacgag 2.181 1.46e-02
Protein: FUS(Hs/Mm)
Sequence Position Motif K-mer Z-score P-value
31 cgcgc accgc 2.036 2.09e-02
311 cgcgc cccgc 2.289 1.10e-02
334 cgcgc uccgc 2.386 8.52e-03
470 cgcgc cccgc 2.024 2.15e-02
473 cgcgc gccgc 2.024 2.15e-02
486 cgcgc cccgc 2.024 2.15e-02
744 cgcgc cccgc 2.024 2.15e-02
761 cgcgc gccgc 2.506 6.11e-03
764 cgcgc gccgc 2.506 6.11e-03
780 cgcgc cucgc 2.036 2.09e-02
1032 cgcgc ugcgc 2.120 1.70e-02
1034 cgcgc cgcgc 1.952 2.55e-02
1114 cgcgc agcgc 2.506 6.11e-03
1117 cgcgc gccgc 2.265 1.18e-02
1120 cgcgc gccgc 2.265 1.18e-02
1179 cgcgc cucgc 2.446 7.22e-03
1192 cgcgc ugcgc 3.566 1.81e-04
1197 cgcgc cucgc 3.036 1.20e-03
1210 cgcgc agcgc 2.916 1.77e-03
1495 cgcgc uacgc 1.675 4.70e-02
1500 cgcgc agcgc 1.735 4.14e-02
Protein: FXR1(Hs/Mm)
Sequence Position Motif K-mer Z-score P-value
604 aygacr uaugac 1.986 2.35e-02
616 aygacr uacgac 1.857 3.17e-02
1648 aygacr aacguc 2.271 1.16e-02
1835 aygacr aacgac 2.057 1.98e-02
1905 aygacr aacgau 2.686 3.62e-03
1924 aygacr aauguc 3.243 5.91e-04
1936 aygacr aaucac 2.357 9.21e-03
Protein: FXR2(Hs/Mm)
Sequence Position Motif K-mer Z-score P-value
222 dgacrrr ggaagag 2.057 1.98e-02
231 dgacrrr gggcgag 2.057 1.98e-02
930 dgacrrr cgacgag 1.686 4.59e-02
1551 dgacrrr ggacagu 2.200 1.39e-02
Protein: G3BP2(Hs/Mm)
Sequence Position Motif K-mer Z-score P-value
1328 aggaudr aggagga 3.133 8.65e-04
1331 aggaudr aggaaca 2.747 3.01e-03
1340 aggaudr aagauga 3.173 7.54e-04
1346 aggaudr aggaaga 3.133 8.65e-04
1963 aggaudr augauca 1.800 3.59e-02
Protein: HNRNPA1(Hs/Mm)
Sequence Position Motif K-mer Z-score P-value
168 guaguagu gcuguagu 2.049 2.02e-02
171 guaguagu guaguaau 2.115 1.72e-02
188 rgnyag aggcag 3.145 8.30e-04
192 duagggw agaggga 1.662 4.83e-02
213 rgnyag ggcuag 2.909 1.81e-03
215 duagggw cuagggu 1.851 3.21e-02
263 duagggw gaaggga 1.716 4.31e-02
282 duagggw auagggg 1.932 2.67e-02
1551 rgnyag ggacag 2.200 1.39e-02
1570 rgnyag agacag 2.255 1.21e-02
1887 duagggw guaagga 2.568 5.11e-03
Protein: HNRNPA1L2(Hs/Mm)
Sequence Position Motif K-mer Z-score P-value
215 duagggw cuagggu 1.873 3.05e-02
282 duagggw auagggg 1.718 4.29e-02
1887 duagggw guaagga 2.296 1.08e-02
Protein: HNRNPA2B1(Hs/Mm)
Sequence Position Motif K-mer Z-score P-value
113 duagggw ggaggga 1.760 3.92e-02
117 duagggw ggaggga 1.760 3.92e-02
192 duagggw agaggga 1.800 3.59e-02
215 duagggw cuagggu 1.853 3.19e-02
263 duagggw gaaggga 1.853 3.19e-02
282 duagggw auagggg 1.947 2.58e-02
1887 duagggw guaagga 2.560 5.23e-03
2247 gguaguag gguacuau 2.569 5.10e-03
Protein: HNRNPC(Hs/Mm)
Sequence Position Motif K-mer Z-score P-value
529 huuuuuk gauuuuu 2.786 2.67e-03
530 huuuuuk auuuuuu 3.473 2.57e-04
531 huuuuuk uuuuuuu 3.348 4.07e-04
532 huuuuuk uuuuuuc 3.170 7.62e-04
1688 huuuuuk gcuuuuu 2.366 8.99e-03
1689 huuuuuk cuuuuuu 2.839 2.26e-03
1690 huuuuuk uuuuuug 2.759 2.90e-03
2060 huuuuuk acuuuuu 3.268 5.42e-04
2061 huuuuuk cuuuuuu 3.643 1.35e-04
2062 huuuuuk uuuuuua 3.339 4.20e-04
2063 huuuuuk uuuuuau 3.018 1.27e-03
2077 huuuuuk aucuuuu 3.268 5.42e-04
2078 huuuuuk ucuuuuu 3.018 1.27e-03
2079 huuuuuk cuuuuuu 3.643 1.35e-04
2080 huuuuuk uuuuuuu 3.634 1.40e-04
2081 huuuuuk uuuuuuu 3.634 1.40e-04
2082 huuuuuk uuuuuuu 3.634 1.40e-04
2083 huuuuuk uuuuuuu 3.634 1.40e-04
2084 huuuuuk uuuuuuc 3.402 3.34e-04
2085 huuuuuk uuuuucu 3.018 1.27e-03
2086 huuuuuk uuuucuu 3.018 1.27e-03
2087 huuuuuk uuucuuu 3.009 1.31e-03
2099 huuuuuk auuugua 2.964 1.52e-03
2113 huuuuuk auuguuu 2.759 2.90e-03
2114 huuuuuk uuguuuu 2.563 5.19e-03
2115 huuuuuk uguuuuu 2.563 5.19e-03
2116 huuuuuk guuuuua 2.750 2.98e-03
2126 huuuuuk aauuuua 2.527 5.75e-03
2127 huuuuuk auuuuaa 2.527 5.75e-03
2144 huuuuuk auguuuc 1.964 2.48e-02
2262 huuuuuk aauuuuu 3.339 4.20e-04
2263 huuuuuk auuuuuu 3.804 7.12e-05
2264 huuuuuk uuuuuuu 3.679 1.17e-04
2265 huuuuuk uuuuuuu 3.679 1.17e-04
2266 huuuuuk uuuuuua 3.411 3.24e-04
2267 huuuuuk uuuuuau 3.098 9.74e-04
2268 huuuuuk uuuuauu 3.098 9.74e-04
2269 huuuuuk uuuauuu 3.098 9.74e-04
2282 huuuuuk auuuugc 3.205 6.75e-04
2287 huuuuuk gcuuuuu 3.143 8.36e-04
2288 huuuuuk cuuuuua 3.527 2.10e-04
2300 huuuuuk gauuuuu 3.009 1.31e-03
2301 huuuuuk auuuuuu 3.741 9.16e-05
2302 huuuuuk uuuuuuu 3.616 1.50e-04
2303 huuuuuk uuuuuuc 3.429 3.03e-04
2304 huuuuuk uuuuucu 3.062 1.10e-03
2311 huuuuuk auuguuu 3.312 4.63e-04
2312 huuuuuk uuguuuu 3.062 1.10e-03
2313 huuuuuk uguuuuu 3.062 1.10e-03
2314 huuuuuk guuuuua 3.312 4.63e-04
Protein: HNRNPCL1(Hs/Mm)
Sequence Position Motif K-mer Z-score P-value
529 huuuuuk gauuuuu 2.781 2.71e-03
530 huuuuuk auuuuuu 3.456 2.74e-04
531 huuuuuk uuuuuuu 3.351 4.03e-04
532 huuuuuk uuuuuuc 3.149 8.19e-04
1688 huuuuuk gcuuuuu 2.377 8.73e-03
1689 huuuuuk cuuuuuu 2.833 2.31e-03
1690 huuuuuk uuuuuug 2.746 3.02e-03
2060 huuuuuk acuuuuu 3.263 5.51e-04
2061 huuuuuk cuuuuuu 3.649 1.32e-04
2062 huuuuuk uuuuuua 3.351 4.03e-04
2063 huuuuuk uuuuuau 3.053 1.13e-03
2077 huuuuuk aucuuuu 3.263 5.51e-04
2078 huuuuuk ucuuuuu 3.053 1.13e-03
2079 huuuuuk cuuuuuu 3.649 1.32e-04
2080 huuuuuk uuuuuuu 3.658 1.27e-04
2081 huuuuuk uuuuuuu 3.658 1.27e-04
2082 huuuuuk uuuuuuu 3.658 1.27e-04
2083 huuuuuk uuuuuuu 3.658 1.27e-04
2084 huuuuuk uuuuuuc 3.395 3.43e-04
2085 huuuuuk uuuuucu 3.053 1.13e-03
2086 huuuuuk uuuucuu 3.053 1.13e-03
2087 huuuuuk uuucuuu 3.044 1.17e-03
2099 huuuuuk auuugua 2.939 1.65e-03
2113 huuuuuk auuguuu 2.746 3.02e-03
2114 huuuuuk uuguuuu 2.570 5.08e-03
2115 huuuuuk uguuuuu 2.570 5.08e-03
2116 huuuuuk guuuuua 2.737 3.10e-03
2126 huuuuuk aauuuua 2.474 6.68e-03
2127 huuuuuk auuuuaa 2.474 6.68e-03
2262 huuuuuk aauuuuu 3.316 4.57e-04
2263 huuuuuk auuuuuu 3.789 7.56e-05
2264 huuuuuk uuuuuuu 3.684 1.15e-04
2265 huuuuuk uuuuuuu 3.684 1.15e-04
2266 huuuuuk uuuuuua 3.404 3.32e-04
2267 huuuuuk uuuuuau 3.114 9.23e-04
2268 huuuuuk uuuuauu 3.114 9.23e-04
2269 huuuuuk uuuauuu 3.114 9.23e-04
2282 huuuuuk auuuugc 3.149 8.19e-04
2287 huuuuuk gcuuuuu 3.132 8.68e-04
2288 huuuuuk cuuuuua 3.491 2.41e-04
2300 huuuuuk gauuuuu 3.009 1.31e-03
2301 huuuuuk auuuuuu 3.719 1.00e-04
2302 huuuuuk uuuuuuu 3.614 1.51e-04
2303 huuuuuk uuuuuuc 3.412 3.22e-04
2304 huuuuuk uuuuucu 3.079 1.04e-03
2311 huuuuuk auuguuu 3.289 5.03e-04
2312 huuuuuk uuguuuu 3.079 1.04e-03
2313 huuuuuk uguuuuu 3.079 1.04e-03
2314 huuuuuk guuuuua 3.289 5.03e-04
Protein: HNRNPF(Hs/Mm)
Sequence Position Motif K-mer Z-score P-value
195 gggug gggag 2.062 1.96e-02
205 gggug gggcg 2.062 1.96e-02
218 gggug gggug 2.955 1.56e-03
231 gggug gggcg 2.062 1.96e-02
Protein: HNRNPH1(Hs/Mm)
Sequence Position Motif K-mer Z-score P-value
223 gargag gaagag 2.920 1.75e-03
237 gargag gcagag 2.510 6.04e-03
646 gargag gacgag 2.730 3.17e-03
649 gargag gaggag 2.890 1.93e-03
652 gargag gaggag 2.890 1.93e-03
1327 gargag gaggag 3.610 1.53e-04
1330 gargag gaggaa 3.180 7.36e-04
1339 gargag gaagau 3.410 3.25e-04
1342 gargag gaugag 3.490 2.42e-04
1345 gargag gaggaa 3.180 7.36e-04
1348 gargag gaagaa 3.590 1.65e-04
1372 gargag gaaaag 2.420 7.76e-03
1621 gargag gaggag 2.550 5.39e-03
1632 gargag caagag 2.340 9.64e-03
1665 gargag gaggag 1.650 4.95e-02
1792 gargag gcagag 2.700 3.47e-03
1795 gargag gaggag 3.460 2.70e-04
1816 gargag gaagag 3.950 3.91e-05
1838 gargag gacgag 3.250 5.77e-04
1843 gargag gaacag 2.770 2.80e-03
Protein: HNRNPH2(Hs/Mm)
Sequence Position Motif K-mer Z-score P-value
77 gggaggg ggcaggg 2.544 5.48e-03
112 gggaggg cggaggg 3.189 7.14e-04
116 gggaggg gggaggg 3.444 2.87e-04
195 gggaggg gggagcg 2.922 1.74e-03
205 gggaggg gggcggc 2.778 2.73e-03
218 gggaggg gggugga 2.478 6.61e-03
261 gggaggg gggaagg 2.767 2.83e-03
262 gggaggg ggaaggg 2.789 2.64e-03
1517 gggaggg ggaagga 1.711 4.35e-02
Protein: HNRNPK(Hs/Mm)
Sequence Position Motif K-mer Z-score P-value
303 ccawmcc ccagccc 3.406 3.30e-04
307 ccawmcc cccuccc 3.072 1.06e-03
323 ccawmcc ccagcca 3.304 4.77e-04
337 ccawmcc gcaaccc 2.275 1.15e-02
739 ccawmcc cccaccc 3.319 4.52e-04
740 ccawmcc ccacccc 3.449 2.81e-04
757 ccawmcc ccuagcc 3.029 1.23e-03
1054 ccawmcc ccgaacc 2.754 2.94e-03
1055 ccawmcc cgaaccc 2.899 1.87e-03
1157 ccawmcc ccuaccc 2.261 1.19e-02
1275 ccawmcc cgagccc 2.261 1.19e-02
1433 ccawmcc gcaaacc 2.029 2.12e-02
1445 ccawmcc acagccc 1.913 2.79e-02
Protein: HNRNPL(Hs/Mm)
Sequence Position Motif K-mer Z-score P-value
402 acacrav acaacac 2.563 5.19e-03
405 acacrav acacccg 2.634 4.22e-03
407 acacrav acccgag 2.648 4.05e-03
419 acacrav acgcgac 2.648 4.05e-03
800 amayama ucacacc 1.840 3.29e-02
1300 acacrav acaccgc 1.915 2.77e-02
1478 amayama ccacaca 2.573 5.04e-03
1480 acacrav acacauc 2.394 8.33e-03
1488 acacrav gcacaac 2.296 1.08e-02
1640 amayama gaacaca 3.200 6.87e-04
1642 amayama acacaca 3.360 3.90e-04
1644 amayama acacaac 2.920 1.75e-03
1852 amayama aaacaca 3.120 9.04e-04
1854 amayama acacaaa 3.147 8.25e-04
1856 amayama acaaacu 2.587 4.84e-03
Protein: HNRNPM(Hs/Mm)
Sequence Position Motif K-mer Z-score P-value
2296 gguugguu aguugauu 2.651 4.01e-03
Protein: HNRNPU(Hs/Mm)
Sequence Position Motif K-mer Z-score P-value
2102 uguauug uguauuu 2.281 1.13e-02
2110 uguauug agaauug 2.078 1.89e-02
Protein: HNRPLL(Hs/Mm)
Sequence Position Motif K-mer Z-score P-value
800 rcahaca ucacacc 1.734 4.15e-02
1640 rcahaca gaacaca 3.152 8.11e-04
1642 rcahaca acacaca 3.304 4.77e-04
1771 rcahaca gcauaca 1.684 4.61e-02
1852 rcahaca aaacaca 2.722 3.24e-03
1854 rcahaca acacaaa 2.722 3.24e-03
1856 rcahaca acaaacu 2.494 6.32e-03
1934 rcahaca gcaauca 1.924 2.72e-02
1977 rcahaca ccucaca 1.684 4.61e-02
Protein: HuR(Hs/Mm)
Sequence Position Motif K-mer Z-score P-value
527 uukruuu uggauuu 2.549 5.40e-03
530 uukruuu auuuuuu 2.516 5.93e-03
531 uukruuu uuuuuuu 2.725 3.22e-03
2061 uukruuu cuuuuuu 2.780 2.72e-03
2079 uukruuu cuuuuuu 2.802 2.54e-03
2080 uukruuu uuuuuuu 3.330 4.34e-04
2081 uukruuu uuuuuuu 3.330 4.34e-04
2082 uukruuu uuuuuuu 3.330 4.34e-04
2083 uukruuu uuuuuuu 3.330 4.34e-04
2087 uukruuu uuucuuu 3.264 5.49e-04
2100 uukruuu uuuguau 3.110 9.35e-04
2101 uukruuu uuguauu 3.044 1.17e-03
2113 uukruuu auuguuu 3.055 1.13e-03
2114 uukruuu uuguuuu 3.176 7.47e-04
2260 uukruuu cuaauuu 2.945 1.61e-03
2263 uukruuu auuuuuu 3.044 1.17e-03
2264 uukruuu uuuuuuu 3.429 3.03e-04
2265 uukruuu uuuuuuu 3.429 3.03e-04
2269 uukruuu uuuauuu 3.538 2.02e-04
2284 uukruuu uuugcuu 3.319 4.52e-04
2285 uukruuu uugcuuu 3.758 8.56e-05
2298 uukruuu uugauuu 3.868 5.49e-05
2301 uukruuu auuuuuu 3.198 6.92e-04
2302 uukruuu uuuuuuu 3.593 1.63e-04
2311 uukruuu auuguuu 3.440 2.91e-04
2312 uukruuu uuguuuu 3.637 1.38e-04
Protein: IGF2BP2(Hs/Mm)
Sequence Position Motif K-mer Z-score P-value
946 vmahwca aaaaaca 2.479 6.59e-03
1771 vmahwca gcauaca 2.137 1.63e-02
1850 vmahwca ugaaaca 2.589 4.81e-03
1852 vmahwca aaacaca 2.849 2.19e-03
1856 vmahwca acaaacu 2.603 4.62e-03
1934 vmahwca gcaauca 2.027 2.13e-02
1957 vmahwca aaaugca 2.000 2.27e-02
2323 vmahwca aaaaaua 2.603 4.62e-03
Protein: IGF2BP3(Hs/Mm)
Sequence Position Motif K-mer Z-score P-value
946 amahwca aaaaaca 2.373 8.82e-03
1852 amahwca aaacaca 2.537 5.59e-03
1854 amahwca acacaaa 2.284 1.12e-02
1856 amahwca acaaacu 2.134 1.64e-02
1957 amahwca aaaugca 1.881 3.00e-02
2323 amahwca aaaaaua 2.612 4.50e-03
2325 amahwca aaauaaa 2.657 3.94e-03
Protein: KHDRBS1(Hs/Mm)
Sequence Position Motif K-mer Z-score P-value
1757 auaaaav uuaaaaa 2.691 3.56e-03
1759 auaaaav aaaaaag 2.629 4.28e-03
2120 auaaaav uuaaaaa 2.887 1.94e-03
2122 auaaaav aaaaaau 2.711 3.35e-03
2166 auaaaav auuaaau 3.072 1.06e-03
2167 auaaaav uuaaaug 2.825 2.36e-03
2183 auaaaav uuaauaa 2.804 2.52e-03
2186 auaaaav auaaaac 3.392 3.47e-04
2253 auaaaav auaaacc 1.866 3.10e-02
2320 auaaaav agaaaaa 2.979 1.45e-03
2322 auaaaav aaaaaau 2.876 2.01e-03
2327 auaaaav auaaaau 3.268 5.42e-04
Protein: KHDRBS2(Hs/Mm)
Sequence Position Motif K-mer Z-score P-value
1756 rauaaam cuuaaaa 1.659 4.86e-02
1758 rauaaam uaaaaaa 1.647 4.98e-02
2119 rauaaam uuuaaaa 1.671 4.74e-02
2121 rauaaam uaaaaaa 1.671 4.74e-02
2165 rauaaam cauuaaa 2.800 2.56e-03
2185 rauaaam aauaaaa 3.165 7.75e-04
2319 rauaaam uagaaaa 3.035 1.20e-03
2321 rauaaam gaaaaaa 3.282 5.15e-04
2326 rauaaam aauaaaa 3.600 1.59e-04
Protein: KHDRBS3(Hs/Mm)
Sequence Position Motif K-mer Z-score P-value
1756 auaaav cuuaaa 2.113 1.73e-02
1758 auaaav uaaaaa 2.113 1.73e-02
1759 auaaav aaaaaa 2.151 1.57e-02
1772 auaaav cauaca 2.113 1.73e-02
1943 auaaav uaugaa 1.849 3.22e-02
2119 auaaav uuuaaa 1.717 4.30e-02
2121 auaaav uaaaaa 1.717 4.30e-02
2122 auaaav aaaaaa 1.755 3.96e-02
2153 auaaav uguaaa 2.330 9.90e-03
2165 auaaav cauuaa 2.811 2.47e-03
2166 auaaav auuaaa 2.868 2.07e-03
2172 auaaav uguaaa 2.811 2.47e-03
2176 auaaav aauaac 2.868 2.07e-03
2185 auaaav aauaaa 3.151 8.14e-04
2319 auaaav uagaaa 2.887 1.94e-03
2321 auaaav gaaaaa 3.132 8.68e-04
2322 auaaav aaaaaa 2.943 1.63e-03
2326 auaaav aauaaa 3.387 3.53e-04
2331 auaaav aauaac 2.943 1.63e-03
Protein: LIN28A(Hs/Mm)
Sequence Position Motif K-mer Z-score P-value
101 hggagwa gggaaaa 1.811 3.51e-02
112 hggagwa cggaggg 2.324 1.01e-02
650 hggagwa aggagga 1.878 3.02e-02
653 hggagwa aggagaa 3.135 8.59e-04
866 hggagwa uggagau 2.541 5.53e-03
888 hggagwa gggagga 3.000 1.35e-03
891 hggagwa aggagac 3.122 8.98e-04
899 hggagwa uggugaa 2.365 9.02e-03
1328 hggagwa aggagga 2.324 1.01e-02
1347 hggagwa ggaagaa 2.703 3.44e-03
1622 hggagwa aggagaa 3.054 1.13e-03
1636 hggagwa aggcgaa 3.135 8.59e-04
1666 hggagwa aggagga 2.716 3.30e-03
1796 hggagwa aggagca 2.135 1.64e-02
Protein: MATR3(Hs/Mm)
Sequence Position Motif K-mer Z-score P-value
358 maucuur aaacuuu 1.784 3.72e-02
1858 maucuur aaacuug 1.797 3.62e-02
1877 maucuur acucuug 1.757 3.95e-02
1983 maucuur aaccuug 1.716 4.31e-02
1994 maucuur agucuug 1.716 4.31e-02
2076 maucuur caucuuu 2.459 6.97e-03
2143 maucuur aauguuu 2.081 1.87e-02
2157 maucuur aauauug 2.284 1.12e-02
2281 maucuur cauuuug 2.203 1.38e-02
Protein: MBNL1(Hs/Mm)
Sequence Position Motif K-mer Z-score P-value
27 ygcuky cgccac 1.990 2.33e-02
30 ygcuky caccgc 1.990 2.33e-02
33 ygcuky cgccgg 1.990 2.33e-02
62 ygcuky uccugc 2.294 1.09e-02
65 ygcuky ugccuc 2.294 1.09e-02
82 ygcuky ggcuuc 2.196 1.40e-02
93 gcuugc ggcuug 1.974 2.42e-02
127 ygcuky cgcuga 1.892 2.92e-02
143 ygcuky cgguuu 2.755 2.93e-03
144 ygcuky gguuuu 1.990 2.33e-02
150 ygcuky cggggc 2.029 2.12e-02
153 ygcuky ggcuuu 2.657 3.94e-03
167 ygcuky cgcugu 3.088 1.01e-03
170 ygcuky uguagu 1.784 3.72e-02
175 ygcuky uaauuc 1.784 3.72e-02
241 ygcuky agcugc 2.402 8.15e-03
244 ygcuky ugcgcu 1.784 3.72e-02
246 ygcuky cgcugc 2.814 2.45e-03
249 ygcuky ugcggg 1.843 3.27e-02
253 ygcuky ggcguc 1.843 3.27e-02
257 ygcuky uccugg 1.843 3.27e-02
288 ygcuky ggcuuc 2.275 1.15e-02
293 ygcuky cgccuc 2.284 1.12e-02
313 ygcuky cgcuga 2.294 1.09e-02
345 ygcuky ugccgc 2.088 1.84e-02
348 ygcuky cgcauc 2.088 1.84e-02
447 ygcuky uucugc 2.294 1.09e-02
452 ygcuky cccauu 2.039 2.07e-02
453 ygcuky ccauuu 2.039 2.07e-02
464 ygcuky cacuuc 3.059 1.11e-03
469 ygcuky ccccgc 2.275 1.15e-02
472 ygcuky cgccgc 3.059 1.11e-03
475 ygcuky cgcugc 3.618 1.48e-04
488 ygcuky cgcuuc 3.706 1.05e-04
491 ygcuky uucucu 2.284 1.12e-02
493 ygcuky cucuga 2.284 1.12e-02
501 ygcuky ggcucu 2.069 1.93e-02
503 ygcuky cucucc 2.069 1.93e-02
505 ygcuky cuccuu 2.069 1.93e-02
506 gcuugc uccuug 2.883 1.97e-03
507 ygcuky ccuugc 2.069 1.93e-02
510 ygcuky ugcagc 2.863 2.10e-03
513 ygcuky agcugc 2.863 2.10e-03
516 ygcuky ugcuua 2.402 8.15e-03
524 ygcuky cgcugg 2.402 8.15e-03
569 ygcuky cgaugc 2.069 1.93e-02
586 ygcuky agcuuc 1.990 2.33e-02
623 ygcuky cggugc 2.294 1.09e-02
626 ygcuky ugcagc 2.294 1.09e-02
640 ygcuky uacugc 2.294 1.09e-02
686 ygcuky agcugc 2.078 1.89e-02
689 ygcuky ugcagc 2.069 1.93e-02
731 ygcuky agcugc 2.500 6.21e-03
734 ygcuky ugcugc 2.912 1.80e-03
743 ygcuky ccccgc 2.039 2.07e-02
746 ygcuky cgcccc 2.039 2.07e-02
749 ygcuky cccugu 2.843 2.23e-03
763 ygcuky cgccgc 2.402 8.15e-03
766 ygcuky cgcucc 2.402 8.15e-03
773 ygcuky ggcucu 1.676 4.69e-02
775 ygcuky cucugc 2.451 7.12e-03
778 ygcuky ugcucg 1.657 4.88e-02
782 ygcuky cgcccu 1.676 4.69e-02
784 ygcuky cccucc 1.676 4.69e-02
787 ygcuky uccuac 1.676 4.69e-02
790 ygcuky uacguu 1.676 4.69e-02
792 ygcuky cguugc 2.451 7.12e-03
795 ygcuky ugcggu 2.451 7.12e-03
805 ygcuky cccuuc 2.392 8.38e-03
812 ygcuky cccuuc 2.392 8.38e-03
863 gcuugc agcugg 2.130 1.66e-02
881 ygcuky agcugc 1.892 2.92e-02
884 ygcuky ugcugg 1.892 2.92e-02
979 ygcuky ggcuuc 2.088 1.84e-02
990 ygcuky cgccgc 2.088 1.84e-02
998 gcuugc agcucg 2.078 1.89e-02
1066 ygcuky cgcggc 2.088 1.84e-02
1081 ygcuky ugcucc 2.088 1.84e-02
1116 ygcuky cgccgc 2.373 8.82e-03
1119 ygcuky cgccgc 2.373 8.82e-03
1122 ygcuky cgccuc 2.392 8.38e-03
1132 ygcuky ugcauc 2.392 8.38e-03
1189 ygcuky uccugc 2.245 1.24e-02
1194 ygcuky cgccuc 2.284 1.12e-02
1212 ygcuky cgccuu 2.402 8.15e-03
1213 ygcuky gccuuc 1.657 4.88e-02
1235 ygcuky cucugc 2.294 1.09e-02
1238 ygcuky ugcucu 2.098 1.80e-02
1283 ygcuky uggugc 2.039 2.07e-02
1286 ygcuky ugcucc 1.990 2.33e-02
1356 ygcuky cgaugu 2.196 1.40e-02
1359 ygcuky uguugu 2.294 1.09e-02
1362 ygcuky uguuuc 2.353 9.31e-03
1365 ygcuky uucugu 2.353 9.31e-03
1416 ygcuky uucugc 2.039 2.07e-02
1419 ygcuky ugcugg 2.069 1.93e-02
1497 ygcuky cgcagc 1.990 2.33e-02
1502 ygcuky cgccuc 2.196 1.40e-02
1506 ygcuky ucccuc 1.990 2.33e-02
1507 ygcuky cccucc 1.941 2.61e-02
1527 ygcuky uccugc 2.500 6.21e-03
1530 ygcuky ugcugc 2.706 3.41e-03
1687 ygcuky agcuuu 2.069 1.93e-02
1697 ygcuky cccugc 2.078 1.89e-02
1907 ygcuky cgauuc 1.892 2.92e-02
1911 ygcuky uccuuc 1.686 4.59e-02
1960 gcuugc ugcaug 2.143 1.61e-02
1984 gcuugc accuug 2.273 1.15e-02
2069 ygcuky ugcuua 2.098 1.80e-02
2088 ygcuky uucuuu 2.098 1.80e-02
2145 ygcuky uguuuc 2.039 2.07e-02
2150 ygcuky cucugu 2.039 2.07e-02
2261 ygcuky uaauuu 1.676 4.69e-02
2264 ygcuky uuuuuu 1.686 4.59e-02
2265 ygcuky uuuuuu 1.686 4.59e-02
2266 ygcuky uuuuuu 1.686 4.59e-02
2270 ygcuky uuauuu 1.686 4.59e-02
2279 ygcuky uacauu 1.892 2.92e-02
2281 ygcuky cauuuu 1.892 2.92e-02
2283 ygcuky uuuugc 1.892 2.92e-02
2286 ygcuky ugcuuu 2.912 1.80e-03
2288 ygcuky cuuuuu 1.990 2.33e-02
2299 ygcuky ugauuu 2.706 3.41e-03
2302 ygcuky uuuuuu 1.990 2.33e-02
2303 ygcuky uuuuuu 1.990 2.33e-02
2304 ygcuky uuuuuc 1.990 2.33e-02
2307 ygcuky uucuau 1.990 2.33e-02
2310 ygcuky uauugu 1.990 2.33e-02
2313 ygcuky uguuuu 2.078 1.89e-02
Protein: MSI1(Hs/Mm)
Sequence Position Motif K-mer Z-score P-value
2223 uaguwrg uaguaua 2.985 1.42e-03
2230 uaguwrg uaguacc 2.818 2.42e-03
2237 uaguwrg uaguauu 2.818 2.42e-03
2245 uaguwrg uagguac 2.879 1.99e-03
Protein: NOVA1(Hs/Mm)
Sequence Position Motif K-mer Z-score P-value
941 ycay ucau 2.750 2.98e-03
953 ycay ucau 2.750 2.98e-03
956 ycay ucau 2.750 2.98e-03
1290 ycay ccau 2.750 2.98e-03
1307 ycay ccac 2.750 2.98e-03
1310 ycay ccac 2.750 2.98e-03
1428 ycay ccac 3.380 3.62e-04
1443 ycay ucac 2.750 2.98e-03
1450 ycay ccac 3.380 3.62e-04
1470 ycay ccac 2.750 2.98e-03
Protein: PABPC1(Hs/Mm)
Sequence Position Motif K-mer Z-score P-value
102 araaaam ggaaaaa 2.608 4.55e-03
104 araaaam aaaaaga 2.539 5.56e-03
105 araaaam aaaagaa 2.392 8.38e-03
944 araaaam ucaaaaa 2.314 1.03e-02
946 araaaam aaaaaca 2.392 8.38e-03
1350 araaaam agaaauc 2.186 1.44e-02
1722 araaaam ggaaaac 2.324 1.01e-02
1724 araaaam aaaacaa 2.324 1.01e-02
1757 araaaam uuaaaaa 2.333 9.82e-03
1758 araaaam uaaaaaa 2.490 6.39e-03
1759 araaaam aaaaaag 2.490 6.39e-03
1890 araaaam aggaaaa 2.392 8.38e-03
1900 araaaam aggaaaa 2.667 3.83e-03
1901 araaaam ggaaaac 2.569 5.10e-03
2052 araaaam auaaaag 1.735 4.14e-02
2054 araaaam aaaagaa 1.745 4.05e-02
2120 araaaam uuaaaaa 2.353 9.31e-03
2121 araaaam uaaaaaa 2.510 6.04e-03
2122 araaaam aaaaaau 2.539 5.56e-03
2320 araaaam agaaaaa 3.598 1.60e-04
2321 araaaam gaaaaaa 3.284 5.12e-04
2322 araaaam aaaaaau 3.333 4.30e-04
2323 araaaam aaaaaua 3.225 6.30e-04
2324 araaaam aaaauaa 3.098 9.74e-04
2325 araaaam aaauaaa 3.098 9.74e-04
2326 araaaam aauaaaa 3.098 9.74e-04
2327 araaaam auaaaau 3.157 7.97e-04
2329 araaaam aaaauaa 3.098 9.74e-04
Protein: PABPC3(Hs/Mm)
Sequence Position Motif K-mer Z-score P-value
103 raaaacm gaaaaag 1.989 2.34e-02
104 raaaacm aaaaaga 1.943 2.60e-02
547 raaaacm gaaaacc 2.909 1.81e-03
548 raaaacm aaaacca 2.307 1.05e-02
946 raaaacm aaaaaca 1.761 3.91e-02
1372 raaaacm gaaaaga 2.080 1.88e-02
1723 raaaacm gaaaaca 2.818 2.42e-03
1732 raaaacm gaaaagg 2.386 8.52e-03
1758 raaaacm uaaaaaa 2.432 7.51e-03
1759 raaaacm aaaaaag 2.375 8.77e-03
1760 raaaacm aaaaagc 2.591 4.78e-03
1761 raaaacm aaaagcc 2.523 5.82e-03
1832 raaaacm ggaaacg 2.625 4.33e-03
1841 raaaacm gagaaca 2.784 2.68e-03
1852 raaaacm aaacaca 2.659 3.92e-03
1892 raaaacm gaaaagu 2.273 1.15e-02
1902 raaaacm gaaaacg 2.591 4.78e-03
2121 raaaacm uaaaaaa 1.784 3.72e-02
2122 raaaacm aaaaaau 1.750 4.01e-02
2123 raaaacm aaaaauu 1.750 4.01e-02
2321 raaaacm gaaaaaa 2.943 1.63e-03
2322 raaaacm aaaaaau 2.648 4.05e-03
2323 raaaacm aaaaaua 2.818 2.42e-03
2328 raaaacm uaaaaua 2.716 3.30e-03
Protein: PABPC4(Hs/Mm)
Sequence Position Motif K-mer Z-score P-value
102 aaaaaar ggaaaaa 2.609 4.54e-03
103 aaaaaar gaaaaag 2.736 3.11e-03
104 aaaaaar aaaaaga 2.945 1.61e-03
105 aaaaaar aaaagaa 2.818 2.42e-03
944 aaaaaar ucaaaaa 2.291 1.10e-02
945 aaaaaar caaaaac 2.391 8.40e-03
946 aaaaaar aaaaaca 2.609 4.54e-03
1372 aaaaaar gaaaaga 2.245 1.24e-02
1373 aaaaaar aaaagag 2.182 1.46e-02
1723 aaaaaar gaaaaca 2.227 1.30e-02
1724 aaaaaar aaaacaa 2.318 1.02e-02
1758 aaaaaar uaaaaaa 2.791 2.63e-03
1759 aaaaaar aaaaaag 2.882 1.98e-03
1760 aaaaaar aaaaagc 2.600 4.66e-03
2052 aaaaaar auaaaag 2.455 7.04e-03
2053 aaaaaar uaaaaga 2.409 8.00e-03
2054 aaaaaar aaaagaa 2.545 5.46e-03
2121 aaaaaar uaaaaaa 2.709 3.37e-03
2122 aaaaaar aaaaaau 2.736 3.11e-03
2123 aaaaaar aaaaauu 2.473 6.70e-03
2185 aaaaaar aauaaaa 2.464 6.87e-03
2186 aaaaaar auaaaac 2.336 9.75e-03
2320 aaaaaar agaaaaa 3.355 3.97e-04
2321 aaaaaar gaaaaaa 3.364 3.84e-04
2322 aaaaaar aaaaaau 3.364 3.84e-04
2323 aaaaaar aaaaaua 3.391 3.48e-04
2324 aaaaaar aaaauaa 3.182 7.31e-04
2325 aaaaaar aaauaaa 3.182 7.31e-04
2326 aaaaaar aauaaaa 3.182 7.31e-04
2327 aaaaaar auaaaau 2.864 2.09e-03
2328 aaaaaar uaaaaua 2.936 1.66e-03
2329 aaaaaar aaaauaa 3.182 7.31e-04
Protein: PABPC5(Hs/Mm)
Sequence Position Motif K-mer Z-score P-value
1338 agaaadu agaagau 2.125 1.68e-02
1350 agaaadu agaaauc 2.636 4.19e-03
1371 agaaadu ggaaaag 1.795 3.63e-02
1722 agaaadu ggaaaac 1.682 4.63e-02
1891 agaaadu ggaaaag 2.227 1.30e-02
1901 agaaadu ggaaaac 2.602 4.63e-03
1921 agaaadu agaaaug 1.966 2.46e-02
2057 agaaadu agaacuu 1.659 4.86e-02
2122 agaaadu aaaaaau 1.648 4.97e-02
2320 agaaadu agaaaaa 3.091 9.97e-04
2322 agaaadu aaaaaau 3.125 8.89e-04
2323 agaaadu aaaaaua 2.568 5.11e-03
2327 agaaadu auaaaau 3.034 1.21e-03
Protein: PABPN1(Hs/Mm)
Sequence Position Motif K-mer Z-score P-value
1335 araaga acaaga 3.185 7.24e-04
1338 araaga agaaga 3.454 2.76e-04
1341 araaga agauga 3.028 1.23e-03
1347 araaga ggaaga 3.120 9.04e-04
1373 araaga aaaaga 2.537 5.59e-03
1724 araaga aaaaca 2.065 1.95e-02
1791 araaga agcaga 2.565 5.16e-03
1794 araaga agagga 2.704 3.43e-03
1815 araaga ugaaga 2.750 2.98e-03
1818 araaga agagga 2.889 1.93e-03
1842 araaga agaaca 2.194 1.41e-02
2320 araaga agaaaa 2.944 1.62e-03
2322 araaga aaaaaa 2.787 2.66e-03
2324 araaga aaaaua 2.676 3.73e-03
2327 araaga auaaaa 2.611 4.51e-03
2329 araaga aaaaua 2.676 3.73e-03
Protein: PCBP1(Hs/Mm)
Sequence Position Motif K-mer Z-score P-value
302 ccwwhcc cccagcc 2.506 6.11e-03
303 ccwwhcc ccagccc 2.506 6.11e-03
307 ccwwhcc cccuccc 2.688 3.59e-03
322 ccwwhcc cccagcc 2.974 1.47e-03
342 ccwwhcc ccuugcc 2.909 1.81e-03
739 ccwwhcc cccaccc 3.169 7.65e-04
740 ccwwhcc ccacccc 3.091 9.97e-04
750 ccwwhcc ccugucc 3.455 2.75e-04
757 ccwwhcc ccuagcc 3.442 2.89e-04
765 ccwwhcc ccgcucc 2.948 1.60e-03
1151 ccwwhcc ucuuccc 2.390 8.42e-03
1156 ccwwhcc cccuacc 2.727 3.20e-03
1157 ccwwhcc ccuaccc 2.753 2.95e-03
1256 ccwwhcc ccucccc 2.013 2.21e-02
Protein: PCBP2(Hs/Mm)
Sequence Position Motif K-mer Z-score P-value
46 ccyycch ccguccc 2.912 1.80e-03
55 ccyycch gcucccc 2.700 3.47e-03
59 ccyycch cccuccu 2.825 2.36e-03
63 ccyycch ccugccu 2.675 3.74e-03
307 ccyycch cccuccc 2.463 6.89e-03
308 ccyycch ccucccg 2.250 1.22e-02
465 ccyycch acuuccc 2.088 1.84e-02
466 ccyycch cuucccc 2.050 2.02e-02
739 ccyycch cccaccc 2.962 1.53e-03
740 ccyycch ccacccc 2.925 1.72e-03
744 ccyycch cccgccc 2.925 1.72e-03
745 ccyycch ccgcccc 2.925 1.72e-03
1151 ccyycch ucuuccc 3.075 1.05e-03
1152 ccyycch cuucccc 2.950 1.59e-03
1156 ccyycch cccuacc 2.850 2.19e-03
1157 ccyycch ccuaccc 3.163 7.81e-04
1504 ccyycch ccucccu 2.562 5.20e-03
1507 ccyycch cccucca 2.538 5.57e-03
Protein: PCBP3(Hs/Mm)
Sequence Position Motif K-mer Z-score P-value
343 uuuycc cuugcc 1.865 3.11e-02
361 uuuycc cuuugc 2.486 6.46e-03
386 uuuycc cuuugc 1.959 2.51e-02
465 uuuycc acuucc 1.811 3.51e-02
466 uuuycc cuuccc 1.811 3.51e-02
Protein: PPRC1(Hs/Mm)
Sequence Position Motif K-mer Z-score P-value
199 ssgcgcs gcgagcg 2.026 2.14e-02
203 ssgcgcs gcgggcg 2.026 2.14e-02
250 ssgcgcs gcgggcg 2.462 6.91e-03
743 ssgcgcs ccccgcc 2.064 1.95e-02
1031 ssgcgcs cugcgcg 1.705 4.41e-02
1033 ssgcgcs gcgcgca 1.744 4.06e-02
1059 ssgcgcs ccccgcc 2.795 2.60e-03
1061 ssgcgcs ccgcccg 2.795 2.60e-03
1063 ssgcgcs gcccgcg 2.936 1.66e-03
1113 ssgcgcs gagcgcc 2.115 1.72e-02
1191 ssgcgcs cugcgcc 2.282 1.12e-02
Protein: PTBP1(Hs/Mm)
Sequence Position Motif K-mer Z-score P-value
155 cucucu cuuuau 1.884 2.98e-02
157 cucucu uuaucu 1.884 2.98e-02
161 cucucu cuaacu 1.884 2.98e-02
165 cucucu cucgcu 2.259 1.19e-02
167 cucucu cgcugu 1.884 2.98e-02
423 cucucu gacucu 1.741 4.08e-02
425 cucucu cucucc 2.107 1.76e-02
427 cucucu cucccg 1.741 4.08e-02
486 cucucu cccgcu 2.098 1.80e-02
491 cucucu uucucu 2.652 4.00e-03
493 cucucu cucuga 2.098 1.80e-02
501 cucucu ggcucu 2.098 1.80e-02
503 cucucu cucucc 2.652 4.00e-03
505 cucucu cuccuu 2.098 1.80e-02
803 cucucu cacccu 1.920 2.74e-02
806 cucucu ccuucu 1.911 2.80e-02
808 cucucu uucucc 1.884 2.98e-02
810 cucucu cucccu 2.214 1.34e-02
1141 cucucu cccucg 2.027 2.13e-02
1143 cucucu cucggu 2.027 2.13e-02
1151 ucuu ucuu 2.161 1.53e-02
1161 cucucu cccucu 2.625 4.33e-03
1163 cucucu cucuca 2.625 4.33e-03
1164 ucuu ucuc 1.884 2.98e-02
1179 cucucu cucgcc 2.027 2.13e-02
1197 cucucu cucgca 2.098 1.80e-02
1214 cucucu ccuucu 2.205 1.37e-02
1216 cucucu uucucu 2.955 1.56e-03
1218 cucucu cucucc 2.955 1.56e-03
1220 cucucu cuccgu 2.250 1.22e-02
1233 cucucu uucucu 2.955 1.56e-03
1235 cucucu cucugc 2.250 1.22e-02
1238 cucucu ugcucu 2.250 1.22e-02
1240 cucucu cucucc 2.946 1.61e-03
1257 cucucu cucccc 2.071 1.92e-02
1505 cucucu cucccu 2.205 1.37e-02
1507 cucucu cccucc 1.839 3.30e-02
1512 cucucu cacucg 1.839 3.30e-02
1524 cucucu cuaucc 1.839 3.30e-02
1879 ucuu ucuu 2.134 1.64e-02
1996 ucuu ucuu 2.161 1.53e-02
2060 ucuu acuu 2.161 1.53e-02
2062 ucuu uuuu 2.161 1.53e-02
2063 ucuu uuuu 2.161 1.53e-02
2064 ucuu uuuu 2.446 7.22e-03
2070 ucuu gcuu 2.446 7.22e-03
2078 ucuu ucuu 3.277 5.25e-04
2080 ucuu uuuu 2.446 7.22e-03
2081 ucuu uuuu 2.446 7.22e-03
2082 ucuu uuuu 2.446 7.22e-03
2083 ucuu uuuu 2.446 7.22e-03
2084 ucuu uuuu 2.446 7.22e-03
2085 ucuu uuuu 2.446 7.22e-03
2086 ucuu uuuu 2.446 7.22e-03
2089 ucuu ucuu 3.277 5.25e-04
2104 ucuu uauu 2.161 1.53e-02
2146 cucucu guuucu 1.893 2.92e-02
2148 cucucu uucucu 2.455 7.04e-03
2150 cucucu cucugu 2.455 7.04e-03
Protein: PUM2(Hs/Mm)
Sequence Position Motif K-mer Z-score P-value
132 uguanaua aguauaaa 1.864 3.12e-02
156 uguanaua uuuaucua 1.773 3.81e-02
2102 uguanaua uguauuua 2.989 1.40e-03
2115 uguanaua uguuuuua 2.852 2.17e-03
2119 uguanaua uuuaaaaa 2.830 2.33e-03
2153 uguanaua uguaaaua 4.295 8.73e-06
2172 uguanaua uguaaaua 4.375 6.07e-06
2224 uguanaua aguauaua 2.761 2.88e-03
2269 uguanaua uuuauuua 2.534 5.64e-03
2273 uguanaua uuuaagua 2.511 6.02e-03
2277 uguanaua aguacauu 2.568 5.11e-03
2313 uguanaua uguuuuua 2.409 8.00e-03
2338 uguanaua ggcaaaua 1.739 4.10e-02
Protein: QKI(Hs/Mm)
Sequence Position Motif K-mer Z-score P-value
1915 acuaay ucuaac 2.022 2.16e-02
2166 acuaay auuaaa 2.467 6.81e-03
2176 acuaay aauaac 2.641 4.13e-03
2185 acuaay aauaaa 2.609 4.54e-03
2253 acuaay auaaac 1.793 3.65e-02
Protein: RALY(Hs/Mm)
Sequence Position Motif K-mer Z-score P-value
530 uuuuuub auuuuuu 3.080 1.03e-03
531 uuuuuub uuuuuuu 3.438 2.93e-04
532 uuuuuub uuuuuuc 3.429 3.03e-04
533 uuuuuub uuuuucg 3.268 5.42e-04
1689 uuuuuub cuuuuuu 2.420 7.76e-03
1690 uuuuuub uuuuuug 2.795 2.60e-03
1691 uuuuuub uuuuugc 2.446 7.22e-03
2061 uuuuuub cuuuuuu 3.330 4.34e-04
2062 uuuuuub uuuuuua 3.750 8.84e-05
2063 uuuuuub uuuuuau 3.321 4.48e-04
2064 uuuuuub uuuuaug 3.438 2.93e-04
2078 uuuuuub ucuuuuu 3.205 6.75e-04
2079 uuuuuub cuuuuuu 3.330 4.34e-04
2080 uuuuuub uuuuuuu 3.821 6.65e-05
2081 uuuuuub uuuuuuu 3.821 6.65e-05
2082 uuuuuub uuuuuuu 3.821 6.65e-05
2083 uuuuuub uuuuuuu 3.821 6.65e-05
2084 uuuuuub uuuuuuc 3.812 6.89e-05
2085 uuuuuub uuuuucu 3.375 3.69e-04
2086 uuuuuub uuuucuu 3.205 6.75e-04
2087 uuuuuub uuucuuu 3.205 6.75e-04
2088 uuuuuub uucuuua 3.125 8.89e-04
2114 uuuuuub uuguuuu 2.420 7.76e-03
2115 uuuuuub uguuuuu 2.420 7.76e-03
2116 uuuuuub guuuuua 2.455 7.04e-03
2117 uuuuuub uuuuuaa 2.446 7.22e-03
2263 uuuuuub auuuuuu 3.312 4.63e-04
2264 uuuuuub uuuuuuu 3.696 1.10e-04
2265 uuuuuub uuuuuuu 3.696 1.10e-04
2266 uuuuuub uuuuuua 3.643 1.35e-04
2267 uuuuuub uuuuuau 3.250 5.77e-04
2268 uuuuuub uuuuauu 3.143 8.36e-04
2269 uuuuuub uuuauuu 3.143 8.36e-04
2270 uuuuuub uuauuua 3.071 1.07e-03
2288 uuuuuub cuuuuua 3.241 5.96e-04
2289 uuuuuub uuuuuaa 3.241 5.96e-04
2301 uuuuuub auuuuuu 3.286 5.08e-04
2302 uuuuuub uuuuuuu 3.643 1.35e-04
2303 uuuuuub uuuuuuc 3.634 1.40e-04
2304 uuuuuub uuuuucu 3.286 5.08e-04
2305 uuuuuub uuuucua 3.045 1.16e-03
2312 uuuuuub uuguuuu 3.116 9.17e-04
2313 uuuuuub uguuuuu 3.116 9.17e-04
2314 uuuuuub guuuuua 3.161 7.86e-04
2315 uuuuuub uuuuuag 3.420 3.13e-04
Protein: RBM28(Hs/Mm)
Sequence Position Motif K-mer Z-score P-value
649 gwguagd gaggagg 2.236 1.27e-02
Protein: RBM3(Hs/Mm)
Sequence Position Motif K-mer Z-score P-value
1833 radacka gaaacga 1.737 4.12e-02
Protein: RBM4(Hs/Mm)
Sequence Position Motif K-mer Z-score P-value
199 gcgcgss gcgagcg 3.044 1.17e-03
201 gcgcgss gagcggg 3.209 6.66e-04
203 gcgcgss gcgggcg 3.099 9.71e-04
205 gcgcgss gggcggc 3.066 1.08e-03
245 gcgcgss gcgcugc 2.593 4.76e-03
250 gcgcgss gcgggcg 2.582 4.91e-03
375 gcgcgss gcgggcg 2.253 1.21e-02
377 gcgcgss gggcggg 2.363 9.06e-03
433 gcgcgss acgcggg 1.692 4.53e-02
839 gcgcgss gcgggag 1.802 3.58e-02
Protein: RBM41(Hs/Mm)
Sequence Position Motif K-mer Z-score P-value
2087 wuacwuk uuucuuu 1.728 4.20e-02
2167 wuacwuk uuaaaug 2.173 1.49e-02
2178 wuacwuk uaacuuu 2.259 1.19e-02
2278 wuacwuk guacauu 3.025 1.24e-03
2285 wuacwuk uugcuuu 2.679 3.69e-03
Protein: RBM42(Hs/Mm)
Sequence Position Motif K-mer Z-score P-value
601 aacuamg aacuaug 2.486 6.46e-03
613 aacuamg gacuacg 2.243 1.24e-02
1895 aacuamg aaguaag 2.365 9.02e-03
2175 aacuamg aaauaac 1.811 3.51e-02
2325 aacuamg aaauaaa 2.000 2.27e-02
2330 aacuamg aaauaac 2.000 2.27e-02
Protein: RBM45(Hs/Mm)
Sequence Position Motif K-mer Z-score P-value
823 gacgamv gacaacg 3.067 1.08e-03
826 gacgamv aacgacg 3.233 6.12e-04
829 gacgamv gacggcg 3.583 1.70e-04
928 gacgamv gacgacg 2.400 8.20e-03
931 gacgamv gacgaga 2.167 1.51e-02
1330 gacgamv gaggaac 2.167 1.51e-02
1348 gacgamv gaagaaa 2.267 1.17e-02
1621 gacgamv gaggaga 1.883 2.99e-02
1819 gacgamv gaggacu 3.633 1.40e-04
1835 gacgamv aacgacg 3.367 3.80e-04
1838 gacgamv gacgaga 3.533 2.05e-04
Protein: RBM46(Hs/Mm)
Sequence Position Motif K-mer Z-score P-value
942 rausawd caucaaa 1.974 2.42e-02
1729 rausawd aaugaaa 1.671 4.74e-02
1936 rausawd aaucacc 2.013 2.21e-02
1943 rausawd uaugaac 2.526 5.77e-03
1958 rausawd aaugcau 2.763 2.86e-03
1965 rausawd gaucaaa 2.724 3.22e-03
2176 rausawd aauaacu 2.395 8.31e-03
2185 rausawd aauaaaa 2.618 4.42e-03
2326 rausawd aauaaaa 2.237 1.26e-02
2331 rausawd aauaacu 1.987 2.35e-02
Protein: RBM5(Hs/Mm)
Sequence Position Motif K-mer Z-score P-value
99 garggwr gcgggaa 2.859 2.12e-03
114 garggwr gagggag 3.167 7.70e-04
118 garggwr gagggau 3.128 8.80e-04
263 garggwr gaaggga 2.359 9.16e-03
1888 garggwr uaaggaa 2.513 5.99e-03
Protein: RBM6(Hs/Mm)
Sequence Position Motif K-mer Z-score P-value
957 hauccar cauccag 2.183 1.45e-02
1763 hauccar aagccac 2.958 1.55e-03
1776 hauccar cauccug 3.127 8.83e-04
1785 hauccar cguccaa 2.789 2.64e-03
1958 hauccar aaugcau 2.070 1.92e-02
1970 hauccar aaugcaa 2.169 1.50e-02
Protein: RBM8A(Hs/Mm)
Sequence Position Motif K-mer Z-score P-value
199 rygcgcb gcgagcg 3.541 1.99e-04
203 rygcgcb gcgggcg 3.568 1.80e-04
229 rygcgcb ccgggcg 3.189 7.14e-04
243 rygcgcb cugcgcu 3.027 1.23e-03
250 rygcgcb gcgggcg 3.297 4.89e-04
375 rygcgcb gcgggcg 2.541 5.53e-03
379 rygcgcb gcgggca 2.284 1.12e-02
683 rygcgcb gcgagcu 2.459 6.97e-03
700 rygcgcb gcgccca 2.459 6.97e-03
1031 rygcgcb cugcgcg 1.878 3.02e-02
1033 rygcgcb gcgcgca 2.027 2.13e-02
Protein: RBMS1(Hs/Mm)
Sequence Position Motif K-mer Z-score P-value
2134 kauauas gauuuac 2.452 7.10e-03
2136 kauauas uuuacac 2.356 9.24e-03
2155 kauauas uaaauau 2.575 5.01e-03
2157 kauauas aauauug 2.658 3.93e-03
2174 kauauas uaaauaa 2.781 2.71e-03
2194 kauauas uuuauag 2.781 2.71e-03
2226 kauauas uauauag 2.932 1.68e-03
2252 kauauas uauaaac 2.658 3.93e-03
2271 kauauas uauuuaa 2.164 1.52e-02
Protein: RBMS3(Hs/Mm)
Sequence Position Motif K-mer Z-score P-value
134 hauaua uauaaa 2.333 9.82e-03
2104 hauaua uauuua 1.844 3.26e-02
2155 hauaua uaaaua 2.948 1.60e-03
2157 hauaua aauauu 2.875 2.02e-03
2170 hauaua aaugua 2.771 2.79e-03
2174 hauaua uaaaua 3.094 9.87e-04
2185 hauaua aauaaa 2.688 3.59e-03
2194 hauaua uuuaua 2.865 2.09e-03
2224 hauaua aguaua 2.708 3.38e-03
2226 hauaua uauaua 3.469 2.61e-04
2241 hauaua auuaua 3.146 8.28e-04
2250 hauaua acuaua 3.229 6.21e-04
2252 hauaua uauaaa 3.042 1.18e-03
2271 hauaua uauuua 2.823 2.38e-03
2324 hauaua aaaaua 2.948 1.60e-03
2326 hauaua aauaaa 3.094 9.87e-04
2329 hauaua aaaaua 2.948 1.60e-03
2340 hauaua caaaua 2.896 1.89e-03
Protein: SAMD4A(Hs/Mm)
Sequence Position Motif K-mer Z-score P-value
34 gckgghm gccgggc 2.568 5.11e-03
78 gckgghm gcagggc 2.395 8.31e-03
99 gckgghm gcgggaa 2.407 8.04e-03
203 gckgghm gcgggcg 2.753 2.95e-03
210 gckgghm gccggcu 2.580 4.94e-03
228 gckgghm gccgggc 3.185 7.24e-04
250 gckgghm gcgggcg 2.272 1.15e-02
375 gckgghm gcgggcg 2.284 1.12e-02
379 gckgghm gcgggca 2.333 9.82e-03
864 gckgghm gcuggag 2.765 2.85e-03
885 gckgghm gcuggga 1.654 4.91e-02
1014 gckgghm gcuggcc 2.889 1.93e-03
Protein: SART3(Hs/Mm)
Sequence Position Motif K-mer Z-score P-value
102 araaaam ggaaaaa 2.618 4.42e-03
104 araaaam aaaaaga 2.549 5.40e-03
105 araaaam aaaagaa 2.392 8.38e-03
944 araaaam ucaaaaa 2.324 1.01e-02
946 araaaam aaaaaca 2.402 8.15e-03
1350 araaaam agaaauc 2.186 1.44e-02
1722 araaaam ggaaaac 2.333 9.82e-03
1724 araaaam aaaacaa 2.333 9.82e-03
1757 araaaam uuaaaaa 2.343 9.56e-03
1758 araaaam uaaaaaa 2.500 6.21e-03
1759 araaaam aaaaaag 2.500 6.21e-03
1890 araaaam aggaaaa 2.392 8.38e-03
1900 araaaam aggaaaa 2.676 3.73e-03
1901 araaaam ggaaaac 2.569 5.10e-03
2052 araaaam auaaaag 1.745 4.05e-02
2054 araaaam aaaagaa 1.745 4.05e-02
2120 araaaam uuaaaaa 2.363 9.06e-03
2121 araaaam uaaaaaa 2.510 6.04e-03
2122 araaaam aaaaaau 2.539 5.56e-03
2320 araaaam agaaaaa 3.608 1.54e-04
2321 araaaam gaaaaaa 3.284 5.12e-04
2322 araaaam aaaaaau 3.333 4.30e-04
2323 araaaam aaaaaua 3.235 6.08e-04
2324 araaaam aaaauaa 3.098 9.74e-04
2325 araaaam aaauaaa 3.098 9.74e-04
2326 araaaam aauaaaa 3.098 9.74e-04
2327 araaaam auaaaau 3.157 7.97e-04
2329 araaaam aaaauaa 3.098 9.74e-04
Protein: SNRNP70(Hs/Mm)
Sequence Position Motif K-mer Z-score P-value
1182 rwucaag gcccaag 1.740 4.09e-02
1953 rwucaag uuucaaa 2.438 7.38e-03
1965 rwucaag gaucaaa 1.781 3.75e-02
Protein: SNRPA(Hs/Mm)
Sequence Position Motif K-mer Z-score P-value
363 wugcacr uugccca 3.648 1.32e-04
388 wugcacr uugcacu 3.296 4.90e-04
1959 wugcacr augcaug 1.761 3.91e-02
Protein: SRSF1(Hs/Mm)
Sequence Position Motif K-mer Z-score P-value
43 crsmsgw cggccgu 2.389 8.45e-03
113 gragga ggaggg 2.882 1.98e-03
117 gragga ggaggg 2.882 1.98e-03
406 crsmsgw cacccga 2.389 8.45e-03
648 gragga cgagga 2.516 5.93e-03
651 gragga ggagga 2.903 1.85e-03
654 gragga ggagaa 2.452 7.10e-03
718 ugrwgvh uggaaga 1.944 2.59e-02
719 ugrwgvh ggaagaa 1.944 2.59e-02
728 ugrwgvh ucgagcu 1.944 2.59e-02
734 ugrwgvh ugcugcc 1.944 2.59e-02
841 ugrwgvh gggagcu 2.333 9.82e-03
866 ugrwgvh uggagau 3.578 1.73e-04
869 ugrwgvh agauggu 2.833 2.31e-03
872 ugrwgvh uggugac 3.433 2.98e-04
888 ugrwgvh gggagga 3.156 8.00e-04
891 ugrwgvh aggagac 3.156 8.00e-04
899 ugrwgvh uggugaa 2.733 3.14e-03
902 ugrwgvh ugaacca 2.333 9.82e-03
1326 gragga ugagga 3.022 1.26e-03
1328 ugrwgvh aggagga 1.944 2.59e-02
1329 gragga ggagga 3.441 2.90e-04
1338 ugrwgvh agaagau 1.944 2.59e-02
1344 gragga ugagga 3.022 1.26e-03
1347 gragga ggaaga 3.097 9.77e-04
1407 ugrwgvh uggauca 1.744 4.06e-02
1419 ugrwgvh ugcugga 1.744 4.06e-02
1422 ugrwgvh uggaggc 2.133 1.65e-02
1663 crsmsgw cagagga 3.242 5.93e-04
1664 gragga agagga 2.484 6.50e-03
1667 gragga ggagga 2.871 2.05e-03
1671 gragga gaacga 2.312 1.04e-02
1794 gragga agagga 2.129 1.66e-02
1797 gragga ggagca 2.065 1.95e-02
1818 gragga agagga 2.129 1.66e-02
Protein: SRSF10(Hs/Mm)
Sequence Position Motif K-mer Z-score P-value
186 agagavm agaggca 2.265 1.18e-02
192 agagavm agaggga 2.253 1.21e-02
1568 agagavm ugagaca 1.880 3.01e-02
1570 agagavm agacaga 1.831 3.36e-02
1794 agagavm agaggag 1.807 3.54e-02
1818 agagavm agaggac 2.446 7.22e-03
Protein: SRSF2(Hs/Mm)
Sequence Position Motif K-mer Z-score P-value
27 gryymcyr cgccaccg 2.841 2.25e-03
30 ugcygyy caccgcc 2.667 3.83e-03
37 gryymcyr gggccccg 2.989 1.40e-03
38 gryymcyr ggccccgg 2.989 1.40e-03
44 ugcygyy ggccguc 2.939 1.65e-03
47 gryymcyr cgucccug 2.989 1.40e-03
53 ugcygyy uggcucc 2.162 1.53e-02
54 gryymcyr ggcucccc 2.523 5.82e-03
57 ugcygyy uccccuc 2.162 1.53e-02
62 ugcygyy uccugcc 2.707 3.39e-03
65 ugcygyy ugccucg 2.162 1.53e-02
293 ugcygyy cgccucu 1.818 3.45e-02
305 ugcygyy agcccuc 1.929 2.69e-02
310 ugcygyy ucccgcu 2.293 1.09e-02
313 ugcygyy cgcugau 1.929 2.69e-02
316 ugcygyy ugauccc 1.929 2.69e-02
329 ugcygyy agcgguc 2.111 1.74e-02
447 ugcygyy uucugcc 2.646 4.07e-03
450 ugcygyy ugcccau 2.253 1.21e-02
469 ugcygyy ccccgcc 2.253 1.21e-02
472 ugcygyy cgccgcu 2.889 1.93e-03
475 ugcygyy cgcugcc 2.646 4.07e-03
485 ugcygyy acccgcu 2.253 1.21e-02
488 ugcygyy cgcuucu 2.323 1.01e-02
501 ugcygyy ggcucuc 2.111 1.74e-02
510 ugcygyy ugcagcu 2.646 4.07e-03
513 ugcygyy agcugcu 2.535 5.62e-03
521 ugcygyy agacgcu 1.768 3.85e-02
554 ugcygyy agcagcc 1.818 3.45e-02
557 ugcygyy agccucc 1.818 3.45e-02
561 ugcygyy ucccgcg 1.818 3.45e-02
569 ugcygyy cgaugcc 1.818 3.45e-02
572 ugcygyy ugccccu 2.172 1.49e-02
626 ugcygyy ugcagcc 2.172 1.49e-02
629 ugcygyy agccgua 1.818 3.45e-02
637 ugcygyy uucuacu 1.818 3.45e-02
640 ugcygyy uacugcg 1.818 3.45e-02
650 ggagwd aggagg 1.897 2.89e-02
653 ggagwd aggaga 3.080 1.03e-03
686 ugcygyy agcugca 1.818 3.45e-02
689 ugcygyy ugcagcc 1.949 2.56e-02
731 ugcygyy agcugcu 3.071 1.07e-03
734 ugcygyy ugcugcc 3.424 3.09e-04
737 ugcygyy ugcccac 2.646 4.07e-03
743 ugcygyy ccccgcc 2.707 3.39e-03
746 ugcygyy cgccccu 2.707 3.39e-03
749 ugcygyy cccuguc 2.707 3.39e-03
752 ugcygyy ugucccc 2.707 3.39e-03
760 ugcygyy agccgcc 2.758 2.91e-03
763 ugcygyy cgccgcu 2.747 3.01e-03
775 ugcygyy cucugcu 2.253 1.21e-02
778 ugcygyy ugcucgc 2.202 1.38e-02
782 ugcygyy cgcccuc 2.202 1.38e-02
795 ugcygyy ugcgguc 2.293 1.09e-02
841 ggagwd gggagc 2.184 1.45e-02
866 ggagwd uggaga 3.529 2.09e-04
888 ggagwd gggagg 3.161 7.86e-04
891 ggagwd aggaga 3.736 9.35e-05
976 ugcygyy agcggcu 1.768 3.85e-02
979 ugcygyy ggcuucu 1.768 3.85e-02
987 ugcygyy ggccgcc 2.313 1.04e-02
990 ugcygyy cgccgcc 2.535 5.62e-03
1013 ugcygyy agcuggc 1.929 2.69e-02
1216 ugcygyy uucucuc 1.929 2.69e-02
1220 ugcygyy cuccguc 1.818 3.45e-02
1235 ugcygyy cucugcu 1.929 2.69e-02
1238 ugcygyy ugcucuc 2.172 1.49e-02
1255 ugcygyy uccuccc 1.818 3.45e-02
1267 ugcygyy ggcagcc 1.818 3.45e-02
1277 ugcygyy agccccu 1.929 2.69e-02
1283 ugcygyy uggugcu 2.172 1.49e-02
1286 ugcygyy ugcucca 1.818 3.45e-02
1359 ugcygyy uguuguu 2.172 1.49e-02
1362 ugcygyy uguuucu 1.929 2.69e-02
1365 ugcygyy uucugug 1.929 2.69e-02
1383 ugcygyy ggcuccu 1.818 3.45e-02
1426 gryymcyr ggccacag 1.909 2.81e-02
1448 gryymcyr gcccacug 1.909 2.81e-02
1506 ugcygyy ucccucc 2.131 1.65e-02
1527 ugcygyy uccugcu 2.667 3.83e-03
1530 ugcygyy ugcugcc 2.586 4.85e-03
1622 ggagwd aggaga 1.954 2.54e-02
1636 ggagwd aggcga 2.471 6.74e-03
1655 ggagwd uggagc 2.103 1.77e-02
1666 ggagwd aggagg 2.322 1.01e-02
1796 ggagwd aggagc 2.241 1.25e-02
2286 ugcygyy ugcuuuu 2.172 1.49e-02
2299 ugcygyy ugauuuu 1.929 2.69e-02
2307 ugcygyy uucuauu 1.929 2.69e-02
2310 ugcygyy uauuguu 1.818 3.45e-02
Protein: SRSF3(Hs/Mm)
Sequence Position Motif K-mer Z-score P-value
41 cuckucy cccggcc 2.030 2.12e-02
45 cuckucy gccgucc 2.030 2.12e-02
56 cuckucy cuccccu 2.020 2.17e-02
58 cuckucy ccccucc 2.030 2.12e-02
59 cuckucy cccuccu 2.030 2.12e-02
61 cuckucy cuccugc 2.030 2.12e-02
82 cuckucy ggcuucu 1.950 2.56e-02
291 cuckucy uucgccu 2.020 2.17e-02
293 cuckucy cgccucu 2.020 2.17e-02
296 cuckucy cucuggc 2.020 2.17e-02
298 cuckucy cuggccc 2.020 2.17e-02
307 cuckucy cccuccc 2.020 2.17e-02
315 cuckucy cugaucc 2.020 2.17e-02
337 wcwwc gcaac 1.696 4.49e-02
341 cuckucy cccuugc 1.860 3.14e-02
348 cuckucy cgcaucc 1.840 3.29e-02
360 wcwwc acuuu 1.696 4.49e-02
361 cuckucy cuuugcc 1.850 3.22e-02
385 wcwwc acuuu 2.186 1.44e-02
398 wcwwc acuua 1.941 2.61e-02
402 wcwwc acaac 2.676 3.73e-03
405 wcwwc acacc 2.186 1.44e-02
420 cuckucy cgcgacu 2.360 9.14e-03
422 cuckucy cgacucu 1.800 3.59e-02
425 cuckucy cucuccc 2.980 1.44e-03
426 wcwwc ucucc 2.186 1.44e-02
429 cuckucy cccgacg 1.800 3.59e-02
444 cuckucy cuauucu 3.240 5.98e-04
445 wcwwc uauuc 1.941 2.61e-02
447 cuckucy uucugcc 2.580 4.94e-03
448 wcwwc ucugc 1.941 2.61e-02
452 cuckucy cccauuu 1.810 3.51e-02
464 cuckucy cacuucc 3.250 5.77e-04
465 wcwwc acuuc 2.431 7.53e-03
466 cuckucy cuucccc 1.940 2.62e-02
469 cuckucy ccccgcc 1.940 2.62e-02
470 cuckucy cccgccg 1.840 3.29e-02
472 cuckucy cgccgcu 1.840 3.29e-02
475 cuckucy cgcugcc 2.490 6.39e-03
481 cuckucy caggacc 1.930 2.68e-02
486 cuckucy cccgcuu 1.930 2.68e-02
488 cuckucy cgcuucu 3.250 5.77e-04
490 cuckucy cuucucu 2.490 6.39e-03
493 cuckucy cucugaa 1.820 3.44e-02
503 cuckucy cucuccu 2.930 1.69e-03
505 cuckucy cuccuug 1.770 3.84e-02
506 cuckucy uccuugc 1.770 3.84e-02
513 cuckucy agcugcu 1.770 3.84e-02
578 wcwwc ucaac 2.676 3.73e-03
587 wcwwc gcuuc 2.373 8.82e-03
590 wcwwc ucacc 2.647 4.06e-03
593 wcwwc ccaac 2.657 3.94e-03
602 wcwwc acuau 2.657 3.94e-03
608 wcwwc accuc 2.402 8.15e-03
610 cuckucy cucgacu 2.030 2.12e-02
611 wcwwc ucgac 2.412 7.93e-03
614 wcwwc acuac 3.392 3.47e-04
617 wcwwc acgac 2.657 3.94e-03
635 wcwwc auuuc 2.765 2.85e-03
637 cuckucy uucuacu 1.860 3.14e-02
638 wcwwc ucuac 3.745 9.02e-05
641 wcwwc acugc 2.735 3.12e-03
656 wcwwc agaac 2.676 3.73e-03
658 cuckucy aacuucu 1.820 3.44e-02
659 wcwwc acuuc 3.539 2.01e-04
661 cuckucy uucuacc 1.690 4.55e-02
662 wcwwc ucuac 3.412 3.22e-04
744 cuckucy cccgccc 1.860 3.14e-02
750 cuckucy ccugucc 2.310 1.04e-02
751 cuckucy cuguccc 2.310 1.04e-02
756 cuckucy cccuagc 1.840 3.29e-02
758 cuckucy cuagccg 1.840 3.29e-02
763 cuckucy cgccgcu 1.860 3.14e-02
765 cuckucy ccgcucc 1.860 3.14e-02
766 cuckucy cgcuccg 1.860 3.14e-02
770 cuckucy ccgggcu 1.850 3.22e-02
775 cuckucy cucugcu 3.090 1.00e-03
777 cuckucy cugcucg 1.820 3.44e-02
780 cuckucy cucgccc 3.250 5.77e-04
783 cuckucy gcccucc 1.950 2.56e-02
784 cuckucy cccuccu 2.660 3.91e-03
786 cuckucy cuccuac 2.660 3.91e-03
788 wcwwc ccuac 1.824 3.41e-02
801 cuckucy cacaccc 1.860 3.14e-02
802 wcwwc acacc 2.373 8.82e-03
805 cuckucy cccuucu 3.100 9.68e-04
806 wcwwc ccuuc 2.373 8.82e-03
807 cuckucy cuucucc 2.370 8.89e-03
808 cuckucy uucuccc 2.370 8.89e-03
809 wcwwc ucucc 2.373 8.82e-03
812 cuckucy cccuucg 2.220 1.32e-02
813 wcwwc ccuuc 2.373 8.82e-03
824 wcwwc acaac 2.892 1.91e-03
827 wcwwc acgac 2.412 7.93e-03
844 cuckucy agcuucu 1.780 3.75e-02
845 wcwwc gcuuc 2.186 1.44e-02
846 cuckucy cuucucc 1.780 3.75e-02
848 wcwwc ucucc 2.186 1.44e-02
852 cuckucy cacggcc 1.780 3.75e-02
896 wcwwc acaug 1.941 2.61e-02
902 wcwwc ugaac 1.941 2.61e-02
914 wcwwc ucauc 2.794 2.60e-03
917 wcwwc ucugc 2.618 4.42e-03
929 wcwwc acgac 2.843 2.23e-03
938 wcwwc ccuuc 2.882 1.98e-03
941 wcwwc ucauc 3.765 8.33e-05
944 wcwwc ucaaa 2.833 2.31e-03
947 wcwwc aaaac 2.833 2.31e-03
950 wcwwc acauc 3.745 9.02e-05
953 wcwwc ucauc 3.745 9.02e-05
955 cuckucy aucaucc 1.660 4.85e-02
956 wcwwc ucauc 3.745 9.02e-05
976 cuckucy agcggcu 2.170 1.50e-02
979 cuckucy ggcuucu 2.820 2.40e-03
981 cuckucy cuucucg 2.090 1.83e-02
984 cuckucy cucggcc 3.250 5.77e-04
990 cuckucy cgccgcc 2.130 1.66e-02
1000 cuckucy cucgucu 3.780 7.84e-05
1015 cuckucy cuggccu 2.560 5.23e-03
1017 cuckucy ggccucc 1.910 2.81e-02
1018 cuckucy gccuccu 1.910 2.81e-02
1020 cuckucy cuccuac 2.530 5.70e-03
1021 cuckucy uccuacc 1.910 2.81e-02
1060 cuckucy cccgccc 2.000 2.27e-02
1066 cuckucy cgcggcc 2.030 2.12e-02
1073 wcwwc acagc 1.696 4.49e-02
1075 cuckucy agcgucu 2.040 2.07e-02
1078 cuckucy gucugcu 2.040 2.07e-02
1079 wcwwc ucugc 1.696 4.49e-02
1080 cuckucy cugcucc 2.040 2.07e-02
1083 cuckucy cuccacc 2.040 2.07e-02
1084 wcwwc uccac 1.696 4.49e-02
1086 cuckucy caccucc 2.030 2.12e-02
1087 wcwwc accuc 1.696 4.49e-02
1095 cuckucy cuuguac 2.020 2.17e-02
1097 wcwwc uguac 1.696 4.49e-02
1133 wcwwc gcauc 1.941 2.61e-02
1135 cuckucy aucgacc 2.310 1.04e-02
1136 wcwwc ucgac 1.941 2.61e-02
1147 cuckucy guggucu 2.310 1.04e-02
1150 cuckucy gucuucc 2.670 3.79e-03
1151 wcwwc ucuuc 3.353 4.00e-04
1155 cuckucy ccccuac 1.840 3.29e-02
1156 cuckucy cccuacc 2.530 5.70e-03
1157 wcwwc ccuac 2.618 4.42e-03
1158 cuckucy cuacccu 1.840 3.29e-02
1160 cuckucy acccucu 1.850 3.22e-02
1161 cuckucy cccucuc 1.840 3.29e-02
1163 cuckucy cucucaa 1.840 3.29e-02
1165 cuckucy cucaacg 1.840 3.29e-02
1166 wcwwc ucaac 3.167 7.70e-04
1169 wcwwc acgac 2.431 7.53e-03
1172 wcwwc acagc 2.431 7.53e-03
1179 cuckucy cucgccc 2.580 4.94e-03
1185 cuckucy caagucc 2.040 2.07e-02
1194 cuckucy cgccucg 1.660 4.85e-02
1197 cuckucy cucgcaa 1.670 4.75e-02
1201 cuckucy caagacu 1.670 4.75e-02
1210 cuckucy agcgccu 1.680 4.65e-02
1212 cuckucy cgccuuc 1.680 4.65e-02
1213 cuckucy gccuucu 2.390 8.42e-03
1214 wcwwc ccuuc 1.696 4.49e-02
1215 cuckucy cuucucu 2.570 5.08e-03
1216 cuckucy uucucuc 1.860 3.14e-02
1218 cuckucy cucuccg 2.580 4.94e-03
1219 wcwwc ucucc 1.882 2.99e-02
1220 cuckucy cuccguc 1.860 3.14e-02
1221 cuckucy uccgucc 2.580 4.94e-03
1222 cuckucy ccguccu 1.860 3.14e-02
1224 cuckucy guccucg 1.860 3.14e-02
1225 wcwwc uccuc 1.912 2.79e-02
1227 cuckucy cucggau 2.580 4.94e-03
1230 cuckucy ggauucu 1.860 3.14e-02
1232 cuckucy auucucu 1.860 3.14e-02
1235 cuckucy cucugcu 3.110 9.35e-04
1236 wcwwc ucugc 1.912 2.79e-02
1237 cuckucy cugcucu 2.580 4.94e-03
1240 cuckucy cucuccu 3.110 9.35e-04
1241 wcwwc ucucc 1.882 2.99e-02
1242 cuckucy cuccucg 2.580 4.94e-03
1243 wcwwc uccuc 1.882 2.99e-02
1245 cuckucy cucgacg 2.570 5.08e-03
1246 wcwwc ucgac 1.824 3.41e-02
1251 cuckucy ggagucc 1.860 3.14e-02
1254 cuckucy guccucc 2.560 5.23e-03
1255 cuckucy uccuccc 1.850 3.22e-02
1257 cuckucy cuccccg 1.860 3.14e-02
1413 cuckucy accuucu 1.670 4.75e-02
1414 wcwwc ccuuc 1.696 4.49e-02
1416 cuckucy uucugcu 1.860 3.14e-02
1417 wcwwc ucugc 1.824 3.41e-02
1430 wcwwc acagc 1.882 2.99e-02
1437 wcwwc accuc 1.912 2.79e-02
1439 cuckucy cuccuca 2.210 1.36e-02
1440 wcwwc uccuc 1.882 2.99e-02
1445 wcwwc acagc 1.824 3.41e-02
1451 cuckucy cacuggu 1.770 3.84e-02
1453 cuckucy cuggucc 2.930 1.69e-03
1456 cuckucy guccuca 1.770 3.84e-02
1457 wcwwc uccuc 2.412 7.93e-03
1460 wcwwc ucaag 2.422 7.72e-03
1471 cuckucy cacgucu 2.750 2.98e-03
1472 wcwwc acguc 2.784 2.68e-03
1473 cuckucy cgucucc 1.670 4.75e-02
1474 cuckucy gucucca 1.670 4.75e-02
1475 wcwwc ucucc 2.784 2.68e-03
1476 cuckucy cuccaca 1.680 4.65e-02
1477 wcwwc uccac 2.784 2.68e-03
1482 wcwwc acauc 3.637 1.38e-04
1485 wcwwc ucagc 2.784 2.68e-03
1490 wcwwc acaac 3.627 1.43e-04
1493 wcwwc acuac 3.627 1.43e-04
1502 cuckucy cgccucc 1.860 3.14e-02
1509 cuckucy cuccacu 1.860 3.14e-02
1510 wcwwc uccac 2.431 7.53e-03
1524 cuckucy cuauccu 1.860 3.14e-02
1574 wcwwc agauc 1.941 2.61e-02
1577 wcwwc ucagc 1.941 2.61e-02
1580 wcwwc gcaac 1.941 2.61e-02
1583 wcwwc acaac 2.431 7.53e-03
1631 wcwwc ucaag 2.314 1.03e-02
1646 wcwwc acaac 2.431 7.53e-03
1649 wcwwc acguc 1.941 2.61e-02
1652 wcwwc ucuug 1.941 2.61e-02
1751 wcwwc uuauc 1.941 2.61e-02
1775 wcwwc acauc 1.941 2.61e-02
1783 cuckucy uccgucc 1.780 3.75e-02
1807 cuckucy cucauuu 1.780 3.75e-02
1823 wcwwc acuug 1.696 4.49e-02
1836 wcwwc acgac 1.696 4.49e-02
1842 wcwwc agaac 1.882 2.99e-02
1856 wcwwc acaaa 1.912 2.79e-02
1860 wcwwc acuug 1.912 2.79e-02
1863 wcwwc ugaac 1.882 2.99e-02
1866 wcwwc acagc 1.882 2.99e-02
1869 wcwwc gcuac 1.824 3.41e-02
1878 cuckucy cucuugu 1.690 4.55e-02
1879 wcwwc ucuug 1.882 2.99e-02
1938 wcwwc ucacc 1.696 4.49e-02
1945 wcwwc ugaac 1.824 3.41e-02
1948 wcwwc acuug 1.882 2.99e-02
1955 wcwwc ucaaa 1.912 2.79e-02
1964 wcwwc ugauc 2.402 8.15e-03
1967 wcwwc ucaaa 2.402 8.15e-03
1973 wcwwc gcaac 2.402 8.15e-03
1976 wcwwc accuc 2.373 8.82e-03
1981 wcwwc acaac 2.794 2.60e-03
1996 wcwwc ucuug 1.941 2.61e-02
2034 wcwwc ucaaa 1.696 4.49e-02
2043 wcwwc acuuu 1.824 3.41e-02
2057 wcwwc agaac 1.824 3.41e-02
2060 wcwwc acuuu 1.696 4.49e-02
2061 cuckucy cuuuuuu 1.950 2.56e-02
2075 wcwwc ccauc 1.882 2.99e-02
2077 cuckucy aucuuuu 1.950 2.56e-02
2078 wcwwc ucuuu 1.882 2.99e-02
2079 cuckucy cuuuuuu 1.950 2.56e-02
2085 cuckucy uuuuucu 1.950 2.56e-02
2086 wcwwc uuuuc 1.696 4.49e-02
2089 wcwwc ucuuu 1.696 4.49e-02
2092 wcwwc uuaac 1.696 4.49e-02
2231 wcwwc aguac 1.696 4.49e-02
2304 cuckucy uuuuucu 1.680 4.65e-02
2309 cuckucy cuauugu 1.680 4.65e-02
Protein: SRSF5(Hs/Mm)
Sequence Position Motif K-mer Z-score P-value
49 yywcwsg ucccugg 1.914 2.78e-02
84 yywcwsg cuucuca 2.484 6.50e-03
86 yywcwsg ucucaga 2.462 6.91e-03
88 yywcwsg ucagagg 2.398 8.24e-03
147 yywcwsg uuucggg 2.269 1.16e-02
162 yywcwsg uaacucg 2.312 1.04e-02
295 yywcwsg ccucugg 2.613 4.49e-03
308 yywcwsg ccucccg 2.591 4.78e-03
390 yywcwsg gcacugg 1.828 3.38e-02
426 yywcwsg ucucccg 1.925 2.71e-02
490 yywcwsg cuucucu 2.323 1.01e-02
492 yywcwsg ucucuga 2.312 1.04e-02
519 yywcwsg uuagacg 2.516 5.93e-03
533 yywcwsg uuuuucg 2.462 6.91e-03
535 yywcwsg uuucggg 2.559 5.25e-03
559 yywcwsg ccucccg 2.301 1.07e-02
588 yywcwsg cuucacc 2.086 1.85e-02
594 yywcwsg caacagg 2.398 8.24e-03
618 yywcwsg cgacucg 2.043 2.05e-02
639 yywcwsg cuacugc 2.086 1.85e-02
777 yywcwsg cugcucg 2.312 1.04e-02
800 yywcwsg ucacacc 2.581 4.93e-03
807 yywcwsg cuucucc 2.462 6.91e-03
814 yywcwsg cuucggg 2.398 8.24e-03
846 yywcwsg cuucucc 1.849 3.22e-02
849 yywcwsg cuccacg 1.849 3.22e-02
981 yywcwsg cuucucg 3.032 1.21e-03
1004 yywcwsg ucucaga 2.656 3.95e-03
1071 yywcwsg ccacagc 1.882 2.99e-02
1102 yywcwsg cugcagg 2.312 1.04e-02
1124 yywcwsg ccucaga 2.462 6.91e-03
1140 yywcwsg ccccucg 2.516 5.93e-03
1162 yywcwsg ccucuca 2.323 1.01e-02
1215 yywcwsg cuucucu 2.516 5.93e-03
1217 yywcwsg ucucucc 2.613 4.49e-03
1234 yywcwsg ucucugc 2.613 4.49e-03
1242 yywcwsg cuccucg 2.613 4.49e-03
1261 yywcwsg ccgcagg 2.484 6.50e-03
1279 yywcwsg ccccugg 2.204 1.38e-02
1385 yywcwsg cuccugg 2.398 8.24e-03
1415 yywcwsg cuucugc 2.484 6.50e-03
1418 yywcwsg cugcugg 2.645 4.08e-03
1428 yywcwsg ccacagc 3.054 1.13e-03
1441 yywcwsg ccucaca 3.054 1.13e-03
1443 yywcwsg ucacagc 3.065 1.09e-03
1450 yywcwsg ccacugg 3.419 3.14e-04
1458 yywcwsg ccucaag 3.043 1.17e-03
1478 yywcwsg ccacaca 2.301 1.07e-02
1511 yywcwsg ccacucg 2.656 3.95e-03
1977 yywcwsg ccucaca 1.828 3.38e-02
2137 yywcwsg uuacaca 2.280 1.13e-02
2147 yywcwsg uuucucu 2.398 8.24e-03
2149 yywcwsg ucucugu 2.398 8.24e-03
2204 yywcwsg uuacaca 1.882 2.99e-02
2333 yywcwsg uaacugg 1.828 3.38e-02
Protein: SRSF6(Hs/Mm)
Sequence Position Motif K-mer Z-score P-value
1481 yrcrkm cacauc 2.596 4.72e-03
Protein: SRSF7(Hs/Mm)
Sequence Position Motif K-mer Z-score P-value
401 acgacg uacaac 2.282 1.12e-02
415 acgacg aaggac 2.936 1.66e-03
420 acgacg cgcgac 3.090 1.00e-03
429 acgacg cccgac 2.577 4.98e-03
545 wggacra uggaaaa 1.957 2.52e-02
567 acgacg gacgau 1.692 4.53e-02
604 acgacg uaugac 3.295 4.92e-04
610 acgacg cucgac 3.551 1.92e-04
613 acgacg gacuac 3.667 1.23e-04
616 acgacg uacgac 3.962 3.72e-05
646 acgacg gacgag 1.692 4.53e-02
650 wggacra aggagga 2.819 2.41e-03
653 wggacra aggagaa 2.819 2.41e-03
823 acgacg gacaac 3.705 1.06e-04
826 acgacg aacgac 4.038 2.70e-05
829 acgacg gacggc 3.987 3.35e-05
839 acgagagay gcgggagcu 2.375 8.77e-03
852 acgacg cacggc 3.077 1.05e-03
853 acgagagay acggccgac 1.850 3.22e-02
856 acgacg gccgac 2.782 2.70e-03
864 acgagagay gcuggagau 1.850 3.22e-02
891 acgagagay aggagacau 1.850 3.22e-02
905 acgagagay accagaguu 1.850 3.22e-02
919 acgacg ugcgac 3.256 5.65e-04
926 wggacra cggacga 2.340 9.64e-03
928 acgacg gacgac 3.897 4.87e-05
931 acgacg gacgag 3.372 3.73e-04
1135 acgacg aucgac 2.269 1.16e-02
1308 acgacg caccac 2.705 3.42e-03
1315 acgagagay agcagcgac 2.200 1.39e-02
1318 acgacg agcgac 2.897 1.88e-03
1328 wggacra aggagga 3.234 6.10e-04
1346 wggacra aggaaga 3.447 2.83e-04
1370 wggacra uggaaaa 2.340 9.64e-03
1471 acgacg cacguc 2.641 4.13e-03
1489 acgacg cacaac 2.167 1.51e-02
1492 acgacg aacuac 2.205 1.37e-02
1622 wggacra aggagaa 2.436 7.43e-03
1645 acgacg cacaac 2.090 1.83e-02
1648 acgacg aacguc 2.718 3.28e-03
1721 wggacra uggaaaa 1.957 2.52e-02
1819 acgacg gaggac 3.231 6.17e-04
1835 acgacg aacgac 3.564 1.83e-04
1836 wggacra acgacga 2.798 2.57e-03
1838 acgacg gacgag 3.231 6.17e-04
1890 wggacra aggaaaa 2.340 9.64e-03
1900 wggacra aggaaaa 2.340 9.64e-03
Protein: SRSF9(Hs/Mm)
Sequence Position Motif K-mer Z-score P-value
113 kgrwgsm ggaggga 2.986 1.41e-03
116 kgrwgsm gggaggg 2.775 2.76e-03
117 kgrwgsm ggaggga 2.986 1.41e-03
650 akgavmr aggagga 3.831 6.38e-05
653 akgavmr aggagaa 3.985 3.37e-05
668 akgavmr agcagca 3.662 1.25e-04
671 akgavmr agcagca 3.662 1.25e-04
674 akgavmr agcagca 3.538 2.02e-04
1295 akgavmr aggagac 1.985 2.36e-02
1328 akgavmr aggagga 3.646 1.33e-04
1331 akgavmr aggaaca 3.831 6.38e-05
1346 akgavmr aggaaga 3.138 8.51e-04
1347 kgrwgsm ggaagaa 2.254 1.21e-02
1666 akgavmr aggagga 3.031 1.22e-03
1669 akgavmr aggaacg 2.985 1.42e-03
1796 akgavmr aggagca 1.938 2.63e-02
Protein: TARDBP(Hs/Mm)
Sequence Position Motif K-mer Z-score P-value
967 ugugug uguaug 2.550 5.39e-03
969 ugugug uaugug 2.550 5.39e-03
971 ugugug ugugga 1.972 2.43e-02
1362 ugugug uguuuc 1.908 2.82e-02
1364 ugugug uuucug 1.908 2.82e-02
1366 ugugug ucugug 2.294 1.09e-02
1368 ugugug ugugga 1.908 2.82e-02
1700 ugugug ugcgug 1.991 2.32e-02
1880 ugugug cuugug 1.679 4.66e-02
1882 ugugug ugugcg 2.064 1.95e-02
1884 ugugug ugcgua 1.679 4.66e-02
Protein: TIA1(Hs/Mm)
Sequence Position Motif K-mer Z-score P-value
145 uuuuubk guuuucg 1.784 3.72e-02
146 uuuuubk uuuucgg 1.686 4.59e-02
530 uuuuubk auuuuuu 3.108 9.42e-04
531 uuuuubk uuuuuuu 3.431 3.01e-04
532 uuuuubk uuuuuuc 3.353 4.00e-04
533 uuuuubk uuuuucg 3.412 3.22e-04
534 uuuuubk uuuucgg 2.824 2.37e-03
1361 uuuuubk uuguuuc 1.765 3.88e-02
1689 uuuuubk cuuuuuu 2.422 7.72e-03
1690 uuuuubk uuuuuug 2.775 2.76e-03
1691 uuuuubk uuuuugc 2.480 6.57e-03
2061 uuuuubk cuuuuuu 3.343 4.14e-04
2062 uuuuubk uuuuuua 3.676 1.18e-04
2063 uuuuubk uuuuuau 3.412 3.22e-04
2064 uuuuubk uuuuaug 3.363 3.85e-04
2078 uuuuubk ucuuuuu 3.147 8.25e-04
2079 uuuuubk cuuuuuu 3.343 4.14e-04
2080 uuuuubk uuuuuuu 3.794 7.41e-05
2081 uuuuubk uuuuuuu 3.794 7.41e-05
2082 uuuuubk uuuuuuu 3.794 7.41e-05
2083 uuuuubk uuuuuuu 3.794 7.41e-05
2084 uuuuubk uuuuuuc 3.676 1.18e-04
2085 uuuuubk uuuuucu 3.549 1.93e-04
2086 uuuuubk uuuucuu 3.147 8.25e-04
2087 uuuuubk uuucuuu 3.147 8.25e-04
2088 uuuuubk uucuuua 3.020 1.26e-03
2114 uuuuubk uuguuuu 2.471 6.74e-03
2115 uuuuubk uguuuuu 2.471 6.74e-03
2116 uuuuubk guuuuua 2.520 5.87e-03
2117 uuuuubk uuuuuaa 2.559 5.25e-03
2263 uuuuubk auuuuuu 3.333 4.30e-04
2264 uuuuubk uuuuuuu 3.676 1.18e-04
2265 uuuuubk uuuuuuu 3.676 1.18e-04
2266 uuuuubk uuuuuua 3.578 1.73e-04
2267 uuuuubk uuuuuau 3.353 4.00e-04
2268 uuuuubk uuuuauu 3.088 1.01e-03
2269 uuuuubk uuuauuu 3.088 1.01e-03
2270 uuuuubk uuauuua 2.961 1.53e-03
2282 uuuuubk auuuugc 3.010 1.31e-03
2288 uuuuubk cuuuuua 3.206 6.73e-04
2289 uuuuubk uuuuuaa 3.275 5.28e-04
2301 uuuuubk auuuuuu 3.314 4.60e-04
2302 uuuuubk uuuuuuu 3.618 1.48e-04
2303 uuuuubk uuuuuuc 3.559 1.86e-04
2304 uuuuubk uuuuucu 3.451 2.79e-04
2305 uuuuubk uuuucua 2.931 1.69e-03
2312 uuuuubk uuguuuu 3.059 1.11e-03
2313 uuuuubk uguuuuu 3.059 1.11e-03
2314 uuuuubk guuuuua 3.118 9.10e-04
2315 uuuuubk uuuuuag 3.500 2.33e-04
Protein: TRA2A(Hs/Mm)
Sequence Position Motif K-mer Z-score P-value
190 gaagaggaag gcagagggag 1.739 4.10e-02
646 gaagaggaag gacgaggagg 1.739 4.10e-02
1327 gaagaggaag gaggaggaac 4.326 7.59e-06
1330 gaagaggaag gaggaacaag 3.815 6.81e-05
1333 gaagaggaag gaacaagaag 4.326 7.59e-06
1336 gaagaggaag caagaagaug 3.815 6.81e-05
1339 gaagaggaag gaagaugagg 4.326 7.59e-06
1342 gaagaggaag gaugaggaag 4.598 2.13e-06
1345 gaagaggaag gaggaagaaa 3.815 6.81e-05
1665 gaagaggaag gaggaggaac 1.739 4.10e-02
1792 gaagaggaag gcagaggagc 2.424 7.68e-03
1795 gaagaggaag gaggagcaaa 2.424 7.68e-03
1816 gaagaggaag gaagaggacu 2.685 3.63e-03
Protein: TRA2B(Hs/Mm)
Sequence Position Motif K-mer Z-score P-value
1330 gaagaa gaggaa 3.277 5.25e-04
1333 gaagaa gaacaa 3.277 5.25e-04
1336 gaagaa caagaa 3.277 5.25e-04
1339 gaagaa gaagau 3.277 5.25e-04
1345 gaagaa gaggaa 3.277 5.25e-04
1348 gaagaa gaagaa 3.652 1.30e-04
1554 aaguguu caguguc 1.821 3.43e-02
1823 aaguguu acuuguu 2.105 1.76e-02
1844 aaguguu aacaguu 1.916 2.77e-02
1923 aaguguu aaauguc 2.200 1.39e-02
1948 aaguguu acuuguu 2.200 1.39e-02
1993 aaguguu gagucuu 1.916 2.77e-02
2008 aaguguu aagauuu 2.105 1.76e-02
2059 aaguguu aacuuuu 1.726 4.22e-02
2094 aaguguu aacagau 2.074 1.90e-02
2096 aaguguu cagauuu 2.074 1.90e-02
2099 aaguguu auuugua 2.095 1.81e-02
2101 aaguguu uuguauu 2.200 1.39e-02
2109 aaguguu aagaauu 2.947 1.60e-03
2112 aaguguu aauuguu 3.326 4.41e-04
2114 aaguguu uuguuuu 2.242 1.25e-02
2123 aaguguu aaaaauu 2.263 1.18e-02
2124 aaguguu aaaauuu 2.263 1.18e-02
2125 aaguguu aaauuuu 2.989 1.40e-03
2126 aaguguu aauuuua 2.263 1.18e-02
2132 aaguguu aagauuu 3.021 1.26e-03
2142 aaguguu caauguu 2.558 5.26e-03
2143 aaguguu aauguuu 1.853 3.19e-02
2144 aaguguu auguuuc 1.884 2.98e-02
2156 aaguguu aaauauu 2.526 5.77e-03
2169 aaguguu aaaugua 2.432 7.51e-03
2179 aaguguu aacuuua 1.768 3.85e-02
2189 aaguguu aaacguu 2.242 1.25e-02
2190 aaguguu aacguuu 1.684 4.61e-02
2191 aaguguu acguuua 1.684 4.61e-02
2237 aaguguu uaguauu 2.105 1.76e-02
2261 aaguguu uaauuuu 1.684 4.61e-02
2262 aaguguu aauuuuu 2.242 1.25e-02
2310 aaguguu uauuguu 1.895 2.90e-02
Protein: TUT1(Hs/Mm)
Sequence Position Motif K-mer Z-score P-value
2227 mrauacu auauagu 2.115 1.72e-02
Protein: U2AF2(Hs/Mm)
Sequence Position Motif K-mer Z-score P-value
530 uuuuuyc auuuuuu 2.905 1.84e-03
531 uuuuuyc uuuuuuu 3.190 7.11e-04
532 uuuuuyc uuuuuuc 3.371 3.74e-04
533 uuuuuyc uuuuucg 2.952 1.58e-03
1689 uuuuuyc cuuuuuu 2.638 4.17e-03
1690 uuuuuyc uuuuuug 2.857 2.14e-03
1691 uuuuuyc uuuuugc 2.857 2.14e-03
1692 uuuuuyc uuuugcc 2.562 5.20e-03
2061 uuuuuyc cuuuuuu 3.390 3.49e-04
2062 uuuuuyc uuuuuua 3.676 1.18e-04
2063 uuuuuyc uuuuuau 3.314 4.60e-04
2078 uuuuuyc ucuuuuu 3.095 9.84e-04
2079 uuuuuyc cuuuuuu 3.390 3.49e-04
2080 uuuuuyc uuuuuuu 3.752 8.77e-05
2081 uuuuuyc uuuuuuu 3.752 8.77e-05
2082 uuuuuyc uuuuuuu 3.752 8.77e-05
2083 uuuuuyc uuuuuuu 3.752 8.77e-05
2084 uuuuuyc uuuuuuc 3.943 4.02e-05
2085 uuuuuyc uuuuucu 3.533 2.05e-04
2086 uuuuuyc uuuucuu 3.219 6.43e-04
2087 uuuuuyc uuucuuu 3.095 9.84e-04
2114 uuuuuyc uuguuuu 1.990 2.33e-02
2115 uuuuuyc uguuuuu 1.990 2.33e-02
2116 uuuuuyc guuuuua 2.105 1.76e-02
2117 uuuuuyc uuuuuaa 2.095 1.81e-02
2263 uuuuuyc auuuuuu 3.143 8.36e-04
2264 uuuuuyc uuuuuuu 3.457 2.73e-04
2265 uuuuuyc uuuuuuu 3.457 2.73e-04
2266 uuuuuyc uuuuuua 3.390 3.49e-04
2267 uuuuuyc uuuuuau 3.076 1.05e-03
2268 uuuuuyc uuuuauu 2.914 1.78e-03
2269 uuuuuyc uuuauuu 2.857 2.14e-03
2282 uuuuuyc auuuugc 3.305 4.75e-04
2288 uuuuuyc cuuuuua 3.295 4.92e-04
2289 uuuuuyc uuuuuaa 3.229 6.21e-04
2301 uuuuuyc auuuuuu 3.305 4.75e-04
2302 uuuuuyc uuuuuuu 3.610 1.53e-04
2303 uuuuuyc uuuuuuc 3.790 7.53e-05
2304 uuuuuyc uuuuucu 3.438 2.93e-04
2305 uuuuuyc uuuucua 3.067 1.08e-03
2312 uuuuuyc uuguuuu 3.019 1.27e-03
2313 uuuuuyc uguuuuu 3.019 1.27e-03
2314 uuuuuyc guuuuua 3.162 7.83e-04
2315 uuuuuyc uuuuuag 3.143 8.36e-04
Protein: YBX1(Hs/Mm)
Sequence Position Motif K-mer Z-score P-value
591 caaccacaa caccaacag 1.954 2.54e-02
592 aacaucd accaaca 2.610 4.53e-03
594 caaccacaa caacaggaa 1.954 2.54e-02
612 caaccacaa cgacuacga 1.954 2.54e-02
658 aacaucd aacuucu 3.117 9.14e-04
665 aacaucd accagca 3.130 8.74e-04
668 aacaucd agcagca 2.987 1.41e-03
671 aacaucd agcagca 2.987 1.41e-03
674 aacaucd agcagca 2.987 1.41e-03
937 aacaucd accuuca 3.922 4.39e-05
940 aacaucd uucauca 3.805 7.09e-05
942 caaccacaa caucaaaaa 1.954 2.54e-02
945 caaccacaa caaaaacau 1.954 2.54e-02
949 aacaucd aacauca 4.818 7.25e-07
952 aacaucd aucauca 4.468 3.95e-06
955 aacaucd aucaucc 4.130 1.81e-05
957 caaccacaa cauccagga 1.954 2.54e-02
1050 caaccacaa cagcccgaa 1.954 2.54e-02
1068 caaccacaa cggccacag 1.954 2.54e-02
1171 aacaucd gacagca 2.234 1.27e-02
1304 caaccacaa cgcccacca 2.276 1.14e-02
1307 caaccacaa ccaccacca 2.598 4.69e-03
1309 aacaucd accacca 3.221 6.39e-04
1310 caaccacaa ccaccagca 2.759 2.90e-03
1312 aacaucd accagca 3.143 8.36e-04
1429 aacaucd cacagca 2.416 7.85e-03
1436 aacaucd aaccucc 2.000 2.27e-02
1481 aacaucd cacauca 1.662 4.83e-02
1576 aacaucd aucagca 2.909 1.81e-03
1578 caaccacaa cagcaacaa 3.391 3.48e-04
1579 aacaucd agcaaca 2.909 1.81e-03
1581 caaccacaa caacaaccg 2.920 1.75e-03
1582 aacaucd aacaacc 3.026 1.24e-03
1584 caaccacaa caaccgaaa 3.391 3.48e-04
1599 caaccacaa cagccccag 2.920 1.75e-03
1834 caaccacaa aaacgacga 2.276 1.14e-02
1837 caaccacaa cgacgagaa 2.276 1.14e-02
1851 caaccacaa gaaacacaa 2.598 4.69e-03
1853 aacaucd aacacaa 2.117 1.71e-02
1865 aacaucd aacagcu 2.299 1.08e-02
Protein: YBX2(Hs/Mm)
Sequence Position Motif K-mer Z-score P-value
551 aacawcd accagca 1.770 3.84e-02
658 aacawcd aacuucu 2.838 2.27e-03
665 aacawcd accagca 2.716 3.30e-03
668 aacawcd agcagca 2.797 2.58e-03
671 aacawcd agcagca 2.797 2.58e-03
674 aacawcd agcagca 2.797 2.58e-03
946 aacawcd aaaaaca 3.378 3.65e-04
949 aacawcd aacauca 3.743 9.09e-05
952 aacawcd aucauca 3.297 4.89e-04
955 aacawcd aucaucc 3.108 9.42e-04
1168 aacawcd aacgaca 2.203 1.38e-02
1171 aacawcd gacagca 2.095 1.81e-02
1174 aacawcd agcagcu 2.068 1.93e-02
1312 aacawcd accagca 2.743 3.04e-03
1315 aacawcd agcagcg 2.770 2.80e-03
1334 aacawcd aacaaga 2.649 4.04e-03
1429 aacawcd cacagca 2.284 1.12e-02
1436 aacawcd aaccucc 1.770 3.84e-02
1481 aacawcd cacauca 2.865 2.09e-03
1484 aacawcd aucagca 2.622 4.37e-03
1489 aacawcd cacaacu 2.905 1.84e-03
1492 aacawcd aacuacg 2.838 2.27e-03
1576 aacawcd aucagca 2.946 1.61e-03
1579 aacawcd agcaaca 3.297 4.89e-04
1582 aacawcd aacaacc 3.568 1.80e-04
[truncated: 93 more rows]

## Sheet: myc-202
Predictions for sequence: sequence1
Calculation parameters:
Genome: Human (hg38)
Selected motifs: All Human/Mouse motifs
Stringency level: Medium
Conservation filter: Off
======================================================================================================================
Protein: A1CF(Hs/Mm)
Sequence Position Motif K-mer Z-score P-value
2088 wuaauur guauuua 1.911 2.80e-02
2095 wuaauur agaauug 2.100 1.79e-02
2109 wuaauur aaaauuu 1.933 2.66e-02
2139 wuaauur guaaaua 2.344 9.54e-03
2152 wuaauur uuaaaug 2.844 2.23e-03
2158 wuaauur guaaaua 2.611 4.51e-03
2162 wuaauur auaacuu 2.633 4.23e-03
2168 wuaauur uuaauaa 2.567 5.13e-03
2245 wuaauur cuaauuu 2.889 1.93e-03
2254 wuaauur uuuauuu 2.544 5.48e-03
2255 wuaauur uuauuua 2.733 3.14e-03
2259 wuaauur uuaagua 2.944 1.62e-03
Protein: ANKHD1(Hs/Mm)
Sequence Position Motif K-mer Z-score P-value
614 agacgww agccgua 1.652 4.93e-02
912 agacgww ggacgac 2.478 6.61e-03
915 agacgww cgacgag 2.507 6.09e-03
920 agacgww agaccuu 2.725 3.22e-03
1323 agacgww agaagau 2.087 1.84e-02
1822 agacgww cgacgag 2.043 2.05e-02
Protein: BRUNOL4(Hs/Mm)
Sequence Position Motif K-mer Z-score P-value
1347 kgugukk uguuucu 2.297 1.08e-02
1351 kgugukk ucugugg 2.365 9.02e-03
2085 kgugukk uuuguau 2.811 2.47e-03
2087 kgugukk uguauuu 2.905 1.84e-03
2100 kgugukk uguuuuu 2.568 5.11e-03
2298 kgugukk uguuuuu 1.865 3.11e-02
Protein: BRUNOL5(Hs/Mm)
Sequence Position Motif K-mer Z-score P-value
1347 ugugukk uguuucu 1.950 2.56e-02
1351 ugugukk ucugugg 1.938 2.63e-02
2085 ugugukk uuuguau 1.925 2.71e-02
2087 ugugukk uguauuu 2.100 1.79e-02
2100 ugugukk uguuuuu 2.188 1.43e-02
Protein: BRUNOL6(Hs/Mm)
Sequence Position Motif K-mer Z-score P-value
1351 ugugdkg ucugugg 1.800 3.59e-02
Protein: CNOT4(Hs/Mm)
Sequence Position Motif K-mer Z-score P-value
1537 gacaga gacagu 3.435 2.96e-04
1543 gacaga gucaga 3.435 2.96e-04
1556 gacaga gacaga 3.880 5.22e-05
1626 gacaga aacaca 2.565 5.16e-03
1628 gacaga cacaca 2.228 1.29e-02
1646 gacaga gccaga 2.337 9.72e-03
1838 gacaga aacaca 1.870 3.07e-02
1840 gacaga cacaaa 1.848 3.23e-02
2192 gacaga cacaga 1.696 4.49e-02
Protein: CPEB2(Hs/Mm)
Sequence Position Motif K-mer Z-score P-value
514 chuuuuu gauuuuu 2.673 3.76e-03
515 chuuuuu auuuuuu 2.796 2.59e-03
516 chuuuuu uuuuuuu 2.837 2.28e-03
517 chuuuuu uuuuuuc 2.439 7.36e-03
1673 chuuuuu gcuuuuu 2.398 8.24e-03
1674 chuuuuu cuuuuuu 2.776 2.75e-03
1675 chuuuuu uuuuuug 2.337 9.72e-03
1794 chuuuuu cauuucu 1.673 4.72e-02
2045 chuuuuu acuuuuu 3.531 2.07e-04
2046 chuuuuu cuuuuuu 4.163 1.57e-05
2047 chuuuuu uuuuuua 3.306 4.73e-04
2061 chuuuuu caucuuu 3.429 3.03e-04
2062 chuuuuu aucuuuu 3.224 6.32e-04
2063 chuuuuu ucuuuuu 3.602 1.58e-04
2064 chuuuuu cuuuuuu 4.163 1.57e-05
2065 chuuuuu uuuuuuu 3.806 7.06e-05
2066 chuuuuu uuuuuuu 3.806 7.06e-05
2067 chuuuuu uuuuuuu 3.806 7.06e-05
2068 chuuuuu uuuuuuu 3.806 7.06e-05
2069 chuuuuu uuuuuuc 3.306 4.73e-04
2099 chuuuuu uuguuuu 2.194 1.41e-02
2100 chuuuuu uguuuuu 2.296 1.08e-02
2101 chuuuuu guuuuua 2.184 1.45e-02
2247 chuuuuu aauuuuu 3.173 7.54e-04
2248 chuuuuu auuuuuu 3.347 4.08e-04
2249 chuuuuu uuuuuuu 3.418 3.15e-04
2250 chuuuuu uuuuuuu 3.418 3.15e-04
2251 chuuuuu uuuuuua 2.929 1.70e-03
2266 chuuuuu cauuuug 3.398 3.39e-04
2272 chuuuuu gcuuuuu 3.163 7.81e-04
2273 chuuuuu cuuuuua 3.418 3.15e-04
2285 chuuuuu gauuuuu 3.173 7.54e-04
2286 chuuuuu auuuuuu 3.327 4.39e-04
2287 chuuuuu uuuuuuu 3.378 3.65e-04
2288 chuuuuu uuuuuuc 2.918 1.76e-03
2297 chuuuuu uuguuuu 2.827 2.35e-03
2298 chuuuuu uguuuuu 3.031 1.22e-03
2299 chuuuuu guuuuua 2.755 2.93e-03
Protein: CPEB4(Hs/Mm)
Sequence Position Motif K-mer Z-score P-value
514 uuuuuu gauuuu 2.713 3.33e-03
515 uuuuuu auuuuu 3.165 7.75e-04
516 uuuuuu uuuuuu 3.183 7.29e-04
517 uuuuuu uuuuuu 3.183 7.29e-04
518 uuuuuu uuuuuc 2.617 4.44e-03
1673 uuuuuu gcuuuu 2.548 5.42e-03
1674 uuuuuu cuuuuu 3.043 1.17e-03
1675 uuuuuu uuuuuu 2.957 1.55e-03
1676 uuuuuu uuuuug 2.513 5.99e-03
2045 uuuuuu acuuuu 3.104 9.55e-04
2046 uuuuuu cuuuuu 3.783 7.75e-05
2047 uuuuuu uuuuuu 3.652 1.30e-04
2048 uuuuuu uuuuua 3.009 1.31e-03
2063 uuuuuu ucuuuu 3.130 8.74e-04
2064 uuuuuu cuuuuu 3.783 7.75e-05
2065 uuuuuu uuuuuu 3.652 1.30e-04
2066 uuuuuu uuuuuu 3.652 1.30e-04
2067 uuuuuu uuuuuu 3.652 1.30e-04
2068 uuuuuu uuuuuu 3.652 1.30e-04
2069 uuuuuu uuuuuu 3.652 1.30e-04
2070 uuuuuu uuuuuc 3.009 1.31e-03
2100 uuuuuu uguuuu 2.609 4.54e-03
2101 uuuuuu guuuuu 2.896 1.89e-03
2102 uuuuuu uuuuua 2.557 5.28e-03
2111 uuuuuu aauuuu 2.643 4.11e-03
2112 uuuuuu auuuua 2.530 5.70e-03
2247 uuuuuu aauuuu 2.948 1.60e-03
2248 uuuuuu auuuuu 3.548 1.94e-04
2249 uuuuuu uuuuuu 3.583 1.70e-04
2250 uuuuuu uuuuuu 3.583 1.70e-04
2251 uuuuuu uuuuuu 3.583 1.70e-04
2252 uuuuuu uuuuua 2.948 1.60e-03
2266 uuuuuu cauuuu 3.270 5.38e-04
2267 uuuuuu auuuug 2.991 1.39e-03
2272 uuuuuu gcuuuu 3.052 1.14e-03
2273 uuuuuu cuuuuu 3.696 1.10e-04
2274 uuuuuu uuuuua 2.965 1.51e-03
2285 uuuuuu gauuuu 3.043 1.17e-03
2286 uuuuuu auuuuu 3.548 1.94e-04
2287 uuuuuu uuuuuu 3.574 1.76e-04
2288 uuuuuu uuuuuu 3.574 1.76e-04
2289 uuuuuu uuuuuc 2.948 1.60e-03
2298 uuuuuu uguuuu 3.009 1.31e-03
2299 uuuuuu guuuuu 3.409 3.26e-04
2300 uuuuuu uuuuua 2.835 2.29e-03
Protein: CUG-BP(Hs/Mm)
Sequence Position Motif K-mer Z-score P-value
226 ugcug agcug 2.133 1.65e-02
231 ugcug cgcug 2.115 1.72e-02
234 ugcug ugcgg 2.133 1.65e-02
242 ugcug uccug 2.115 1.72e-02
495 ugcug ugcag 2.142 1.61e-02
498 ugcug agcug 2.150 1.58e-02
501 ugcug ugcuu 2.142 1.61e-02
509 ugcug cgcug 2.133 1.65e-02
611 ugcug ugcag 1.743 4.07e-02
625 ugcug uacug 1.779 3.76e-02
671 ugcug agcug 1.779 3.76e-02
674 ugcug ugcag 1.743 4.07e-02
716 ugcug agcug 2.097 1.80e-02
719 ugcug ugcug 2.540 5.54e-03
763 ugcug ugcuc 1.814 3.48e-02
780 ugcug ugcgg 1.805 3.55e-02
848 ugcug agcug 2.593 4.76e-03
851 ugcug uggag 1.761 3.91e-02
854 ugcug agaug 1.761 3.91e-02
857 ugcug uggug 2.575 5.01e-03
866 ugcug agcug 2.611 4.51e-03
869 ugcug ugcug 3.053 1.13e-03
884 ugcug uggug 2.319 1.02e-02
998 ugcug agcug 1.743 4.07e-02
1014 ugcug ggcug 1.743 4.07e-02
1066 ugcug ugcuc 1.779 3.76e-02
1088 ugcug ugcag 1.814 3.48e-02
1268 ugcug uggug 1.743 4.07e-02
1271 ugcug ugcuc 1.743 4.07e-02
1344 ugcug uguug 1.814 3.48e-02
1350 ugcug uucug 2.035 2.09e-02
1371 ugcug uccug 1.779 3.76e-02
1389 ugcug gucug 1.673 4.72e-02
1401 ugcug uucug 2.097 1.80e-02
1404 ugcug ugcug 2.540 5.54e-03
1512 ugcug uccug 1.929 2.69e-02
1515 ugcug ugcug 2.372 8.85e-03
1797 ugcug uucug 1.965 2.47e-02
1811 ugcug uguug 1.965 2.47e-02
1814 ugcug ugcgg 1.965 2.47e-02
Protein: DAZAP1(Hs/Mm)
Sequence Position Motif K-mer Z-score P-value
157 uagkwwr uaguaau 1.687 4.58e-02
245 uagkwwr ugggaag 1.910 2.81e-02
268 uagkwwr uaggggg 2.045 2.04e-02
1729 uagkwwr aagguag 2.507 6.09e-03
2211 uagkwwr uauauag 2.806 2.51e-03
2230 uagkwwr uagguac 3.299 4.85e-04
Protein: ENOX1(Hs/Mm)
Sequence Position Motif K-mer Z-score P-value
1535 hrkacag uggacag 1.844 3.26e-02
1554 hrkacag gagacag 2.000 2.27e-02
1827 hrkacag agaacag 1.891 2.93e-02
Protein: ESRP2(Hs/Mm)
Sequence Position Motif K-mer Z-score P-value
245 ugggrad ugggaag 2.237 1.26e-02
443 ugggrad uggggac 1.882 2.99e-02
851 ugggrad uggagau 2.158 1.55e-02
872 ugggrad ugggagg 2.513 5.99e-03
1329 ugggrad ugaggaa 1.934 2.66e-02
Protein: FMR1(Hs/Mm)
Sequence Position Motif K-mer Z-score P-value
446 kgacarg ggacacu 2.014 2.20e-02
468 kgacarg ggacccg 2.514 5.97e-03
1518 kgacarg ugccaag 2.708 3.38e-03
1527 kgacarg ggucaag 2.986 1.41e-03
1536 kgacarg ggacagu 3.083 1.02e-03
1806 kgacarg ggacuug 2.097 1.80e-02
1822 kgacarg cgacgag 2.181 1.46e-02
Protein: FUS(Hs/Mm)
Sequence Position Motif K-mer Z-score P-value
296 cgcgc cccgc 2.289 1.10e-02
319 cgcgc uccgc 2.386 8.52e-03
455 cgcgc cccgc 2.024 2.15e-02
458 cgcgc gccgc 2.024 2.15e-02
471 cgcgc cccgc 2.024 2.15e-02
729 cgcgc cccgc 2.024 2.15e-02
746 cgcgc gccgc 2.506 6.11e-03
749 cgcgc gccgc 2.506 6.11e-03
765 cgcgc cucgc 2.036 2.09e-02
1017 cgcgc ugcgc 2.120 1.70e-02
1019 cgcgc cgcgc 1.952 2.55e-02
1099 cgcgc agcgc 2.506 6.11e-03
1102 cgcgc gccgc 2.265 1.18e-02
1105 cgcgc gccgc 2.265 1.18e-02
1164 cgcgc cucgc 2.446 7.22e-03
1177 cgcgc ugcgc 3.566 1.81e-04
1182 cgcgc cucgc 3.036 1.20e-03
1195 cgcgc agcgc 2.916 1.77e-03
1480 cgcgc uacgc 1.675 4.70e-02
1485 cgcgc agcgc 1.735 4.14e-02
Protein: FXR1(Hs/Mm)
Sequence Position Motif K-mer Z-score P-value
589 aygacr uaugac 1.986 2.35e-02
601 aygacr uacgac 1.857 3.17e-02
1633 aygacr aacguc 2.271 1.16e-02
1820 aygacr aacgac 2.057 1.98e-02
1890 aygacr aacgau 2.686 3.62e-03
1909 aygacr aauguc 3.243 5.91e-04
1921 aygacr aaucac 2.357 9.21e-03
Protein: FXR2(Hs/Mm)
Sequence Position Motif K-mer Z-score P-value
207 dgacrrr ggaagag 2.057 1.98e-02
216 dgacrrr gggcgag 2.057 1.98e-02
915 dgacrrr cgacgag 1.686 4.59e-02
1536 dgacrrr ggacagu 2.200 1.39e-02
Protein: G3BP2(Hs/Mm)
Sequence Position Motif K-mer Z-score P-value
1313 aggaudr aggagga 3.133 8.65e-04
1316 aggaudr aggaaca 2.747 3.01e-03
1325 aggaudr aagauga 3.173 7.54e-04
1331 aggaudr aggaaga 3.133 8.65e-04
1948 aggaudr augauca 1.800 3.59e-02
Protein: HNRNPA1(Hs/Mm)
Sequence Position Motif K-mer Z-score P-value
153 guaguagu gcuguagu 2.049 2.02e-02
156 guaguagu guaguaau 2.115 1.72e-02
173 rgnyag aggcag 3.145 8.30e-04
177 duagggw agaggga 1.662 4.83e-02
198 rgnyag ggcuag 2.909 1.81e-03
200 duagggw cuagggu 1.851 3.21e-02
248 duagggw gaaggga 1.716 4.31e-02
267 duagggw auagggg 1.932 2.67e-02
1536 rgnyag ggacag 2.200 1.39e-02
1555 rgnyag agacag 2.255 1.21e-02
1872 duagggw guaagga 2.568 5.11e-03
Protein: HNRNPA1L2(Hs/Mm)
Sequence Position Motif K-mer Z-score P-value
200 duagggw cuagggu 1.873 3.05e-02
267 duagggw auagggg 1.718 4.29e-02
1872 duagggw guaagga 2.296 1.08e-02
Protein: HNRNPA2B1(Hs/Mm)
Sequence Position Motif K-mer Z-score P-value
98 duagggw ggaggga 1.760 3.92e-02
102 duagggw ggaggga 1.760 3.92e-02
177 duagggw agaggga 1.800 3.59e-02
200 duagggw cuagggu 1.853 3.19e-02
248 duagggw gaaggga 1.853 3.19e-02
267 duagggw auagggg 1.947 2.58e-02
1872 duagggw guaagga 2.560 5.23e-03
2232 gguaguag gguacuau 2.569 5.10e-03
Protein: HNRNPC(Hs/Mm)
Sequence Position Motif K-mer Z-score P-value
514 huuuuuk gauuuuu 2.786 2.67e-03
515 huuuuuk auuuuuu 3.473 2.57e-04
516 huuuuuk uuuuuuu 3.348 4.07e-04
517 huuuuuk uuuuuuc 3.170 7.62e-04
1673 huuuuuk gcuuuuu 2.366 8.99e-03
1674 huuuuuk cuuuuuu 2.839 2.26e-03
1675 huuuuuk uuuuuug 2.759 2.90e-03
2045 huuuuuk acuuuuu 3.268 5.42e-04
2046 huuuuuk cuuuuuu 3.643 1.35e-04
2047 huuuuuk uuuuuua 3.339 4.20e-04
2048 huuuuuk uuuuuau 3.018 1.27e-03
2062 huuuuuk aucuuuu 3.268 5.42e-04
2063 huuuuuk ucuuuuu 3.018 1.27e-03
2064 huuuuuk cuuuuuu 3.643 1.35e-04
2065 huuuuuk uuuuuuu 3.634 1.40e-04
2066 huuuuuk uuuuuuu 3.634 1.40e-04
2067 huuuuuk uuuuuuu 3.634 1.40e-04
2068 huuuuuk uuuuuuu 3.634 1.40e-04
2069 huuuuuk uuuuuuc 3.402 3.34e-04
2070 huuuuuk uuuuucu 3.018 1.27e-03
2071 huuuuuk uuuucuu 3.018 1.27e-03
2072 huuuuuk uuucuuu 3.009 1.31e-03
2084 huuuuuk auuugua 2.964 1.52e-03
2098 huuuuuk auuguuu 2.759 2.90e-03
2099 huuuuuk uuguuuu 2.563 5.19e-03
2100 huuuuuk uguuuuu 2.563 5.19e-03
2101 huuuuuk guuuuua 2.750 2.98e-03
2111 huuuuuk aauuuua 2.527 5.75e-03
2112 huuuuuk auuuuaa 2.527 5.75e-03
2129 huuuuuk auguuuc 1.964 2.48e-02
2247 huuuuuk aauuuuu 3.339 4.20e-04
2248 huuuuuk auuuuuu 3.804 7.12e-05
2249 huuuuuk uuuuuuu 3.679 1.17e-04
2250 huuuuuk uuuuuuu 3.679 1.17e-04
2251 huuuuuk uuuuuua 3.411 3.24e-04
2252 huuuuuk uuuuuau 3.098 9.74e-04
2253 huuuuuk uuuuauu 3.098 9.74e-04
2254 huuuuuk uuuauuu 3.098 9.74e-04
2267 huuuuuk auuuugc 3.205 6.75e-04
2272 huuuuuk gcuuuuu 3.143 8.36e-04
2273 huuuuuk cuuuuua 3.527 2.10e-04
2285 huuuuuk gauuuuu 3.009 1.31e-03
2286 huuuuuk auuuuuu 3.741 9.16e-05
2287 huuuuuk uuuuuuu 3.616 1.50e-04
2288 huuuuuk uuuuuuc 3.429 3.03e-04
2289 huuuuuk uuuuucu 3.062 1.10e-03
2296 huuuuuk auuguuu 3.312 4.63e-04
2297 huuuuuk uuguuuu 3.062 1.10e-03
2298 huuuuuk uguuuuu 3.062 1.10e-03
2299 huuuuuk guuuuua 3.312 4.63e-04
Protein: HNRNPCL1(Hs/Mm)
Sequence Position Motif K-mer Z-score P-value
514 huuuuuk gauuuuu 2.781 2.71e-03
515 huuuuuk auuuuuu 3.456 2.74e-04
516 huuuuuk uuuuuuu 3.351 4.03e-04
517 huuuuuk uuuuuuc 3.149 8.19e-04
1673 huuuuuk gcuuuuu 2.377 8.73e-03
1674 huuuuuk cuuuuuu 2.833 2.31e-03
1675 huuuuuk uuuuuug 2.746 3.02e-03
2045 huuuuuk acuuuuu 3.263 5.51e-04
2046 huuuuuk cuuuuuu 3.649 1.32e-04
2047 huuuuuk uuuuuua 3.351 4.03e-04
2048 huuuuuk uuuuuau 3.053 1.13e-03
2062 huuuuuk aucuuuu 3.263 5.51e-04
2063 huuuuuk ucuuuuu 3.053 1.13e-03
2064 huuuuuk cuuuuuu 3.649 1.32e-04
2065 huuuuuk uuuuuuu 3.658 1.27e-04
2066 huuuuuk uuuuuuu 3.658 1.27e-04
2067 huuuuuk uuuuuuu 3.658 1.27e-04
2068 huuuuuk uuuuuuu 3.658 1.27e-04
2069 huuuuuk uuuuuuc 3.395 3.43e-04
2070 huuuuuk uuuuucu 3.053 1.13e-03
2071 huuuuuk uuuucuu 3.053 1.13e-03
2072 huuuuuk uuucuuu 3.044 1.17e-03
2084 huuuuuk auuugua 2.939 1.65e-03
2098 huuuuuk auuguuu 2.746 3.02e-03
2099 huuuuuk uuguuuu 2.570 5.08e-03
2100 huuuuuk uguuuuu 2.570 5.08e-03
2101 huuuuuk guuuuua 2.737 3.10e-03
2111 huuuuuk aauuuua 2.474 6.68e-03
2112 huuuuuk auuuuaa 2.474 6.68e-03
2247 huuuuuk aauuuuu 3.316 4.57e-04
2248 huuuuuk auuuuuu 3.789 7.56e-05
2249 huuuuuk uuuuuuu 3.684 1.15e-04
2250 huuuuuk uuuuuuu 3.684 1.15e-04
2251 huuuuuk uuuuuua 3.404 3.32e-04
2252 huuuuuk uuuuuau 3.114 9.23e-04
2253 huuuuuk uuuuauu 3.114 9.23e-04
2254 huuuuuk uuuauuu 3.114 9.23e-04
2267 huuuuuk auuuugc 3.149 8.19e-04
2272 huuuuuk gcuuuuu 3.132 8.68e-04
2273 huuuuuk cuuuuua 3.491 2.41e-04
2285 huuuuuk gauuuuu 3.009 1.31e-03
2286 huuuuuk auuuuuu 3.719 1.00e-04
2287 huuuuuk uuuuuuu 3.614 1.51e-04
2288 huuuuuk uuuuuuc 3.412 3.22e-04
2289 huuuuuk uuuuucu 3.079 1.04e-03
2296 huuuuuk auuguuu 3.289 5.03e-04
2297 huuuuuk uuguuuu 3.079 1.04e-03
2298 huuuuuk uguuuuu 3.079 1.04e-03
2299 huuuuuk guuuuua 3.289 5.03e-04
Protein: HNRNPF(Hs/Mm)
Sequence Position Motif K-mer Z-score P-value
180 gggug gggag 2.062 1.96e-02
190 gggug gggcg 2.062 1.96e-02
203 gggug gggug 2.955 1.56e-03
216 gggug gggcg 2.062 1.96e-02
Protein: HNRNPH1(Hs/Mm)
Sequence Position Motif K-mer Z-score P-value
208 gargag gaagag 2.920 1.75e-03
222 gargag gcagag 2.510 6.04e-03
631 gargag gacgag 2.730 3.17e-03
634 gargag gaggag 2.890 1.93e-03
637 gargag gaggag 2.890 1.93e-03
1312 gargag gaggag 3.610 1.53e-04
1315 gargag gaggaa 3.180 7.36e-04
1324 gargag gaagau 3.410 3.25e-04
1327 gargag gaugag 3.490 2.42e-04
1330 gargag gaggaa 3.180 7.36e-04
1333 gargag gaagaa 3.590 1.65e-04
1357 gargag gaaaag 2.420 7.76e-03
1606 gargag gaggag 2.550 5.39e-03
1617 gargag caagag 2.340 9.64e-03
1650 gargag gaggag 1.650 4.95e-02
1777 gargag gcagag 2.700 3.47e-03
1780 gargag gaggag 3.460 2.70e-04
1801 gargag gaagag 3.950 3.91e-05
1823 gargag gacgag 3.250 5.77e-04
1828 gargag gaacag 2.770 2.80e-03
Protein: HNRNPH2(Hs/Mm)
Sequence Position Motif K-mer Z-score P-value
62 gggaggg ggcaggg 2.544 5.48e-03
97 gggaggg cggaggg 3.189 7.14e-04
101 gggaggg gggaggg 3.444 2.87e-04
180 gggaggg gggagcg 2.922 1.74e-03
190 gggaggg gggcggc 2.778 2.73e-03
203 gggaggg gggugga 2.478 6.61e-03
246 gggaggg gggaagg 2.767 2.83e-03
247 gggaggg ggaaggg 2.789 2.64e-03
1502 gggaggg ggaagga 1.711 4.35e-02
Protein: HNRNPK(Hs/Mm)
Sequence Position Motif K-mer Z-score P-value
288 ccawmcc ccagccc 3.406 3.30e-04
292 ccawmcc cccuccc 3.072 1.06e-03
308 ccawmcc ccagcca 3.304 4.77e-04
322 ccawmcc gcaaccc 2.275 1.15e-02
724 ccawmcc cccaccc 3.319 4.52e-04
725 ccawmcc ccacccc 3.449 2.81e-04
742 ccawmcc ccuagcc 3.029 1.23e-03
1039 ccawmcc ccgaacc 2.754 2.94e-03
1040 ccawmcc cgaaccc 2.899 1.87e-03
1142 ccawmcc ccuaccc 2.261 1.19e-02
1260 ccawmcc cgagccc 2.261 1.19e-02
1418 ccawmcc gcaaacc 2.029 2.12e-02
1430 ccawmcc acagccc 1.913 2.79e-02
Protein: HNRNPL(Hs/Mm)
Sequence Position Motif K-mer Z-score P-value
387 acacrav acaacac 2.563 5.19e-03
390 acacrav acacccg 2.634 4.22e-03
392 acacrav acccgag 2.648 4.05e-03
404 acacrav acgcgac 2.648 4.05e-03
785 amayama ucacacc 1.840 3.29e-02
1285 acacrav acaccgc 1.915 2.77e-02
1463 amayama ccacaca 2.573 5.04e-03
1465 acacrav acacauc 2.394 8.33e-03
1473 acacrav gcacaac 2.296 1.08e-02
1625 amayama gaacaca 3.200 6.87e-04
1627 amayama acacaca 3.360 3.90e-04
1629 amayama acacaac 2.920 1.75e-03
1837 amayama aaacaca 3.120 9.04e-04
1839 amayama acacaaa 3.147 8.25e-04
1841 amayama acaaacu 2.587 4.84e-03
Protein: HNRNPM(Hs/Mm)
Sequence Position Motif K-mer Z-score P-value
2281 gguugguu aguugauu 2.651 4.01e-03
Protein: HNRNPU(Hs/Mm)
Sequence Position Motif K-mer Z-score P-value
2087 uguauug uguauuu 2.281 1.13e-02
2095 uguauug agaauug 2.078 1.89e-02
Protein: HNRPLL(Hs/Mm)
Sequence Position Motif K-mer Z-score P-value
785 rcahaca ucacacc 1.734 4.15e-02
1625 rcahaca gaacaca 3.152 8.11e-04
1627 rcahaca acacaca 3.304 4.77e-04
1756 rcahaca gcauaca 1.684 4.61e-02
1837 rcahaca aaacaca 2.722 3.24e-03
1839 rcahaca acacaaa 2.722 3.24e-03
1841 rcahaca acaaacu 2.494 6.32e-03
1919 rcahaca gcaauca 1.924 2.72e-02
1962 rcahaca ccucaca 1.684 4.61e-02
Protein: HuR(Hs/Mm)
Sequence Position Motif K-mer Z-score P-value
512 uukruuu uggauuu 2.549 5.40e-03
515 uukruuu auuuuuu 2.516 5.93e-03
516 uukruuu uuuuuuu 2.725 3.22e-03
2046 uukruuu cuuuuuu 2.780 2.72e-03
2064 uukruuu cuuuuuu 2.802 2.54e-03
2065 uukruuu uuuuuuu 3.330 4.34e-04
2066 uukruuu uuuuuuu 3.330 4.34e-04
2067 uukruuu uuuuuuu 3.330 4.34e-04
2068 uukruuu uuuuuuu 3.330 4.34e-04
2072 uukruuu uuucuuu 3.264 5.49e-04
2085 uukruuu uuuguau 3.110 9.35e-04
2086 uukruuu uuguauu 3.044 1.17e-03
2098 uukruuu auuguuu 3.055 1.13e-03
2099 uukruuu uuguuuu 3.176 7.47e-04
2245 uukruuu cuaauuu 2.945 1.61e-03
2248 uukruuu auuuuuu 3.044 1.17e-03
2249 uukruuu uuuuuuu 3.429 3.03e-04
2250 uukruuu uuuuuuu 3.429 3.03e-04
2254 uukruuu uuuauuu 3.538 2.02e-04
2269 uukruuu uuugcuu 3.319 4.52e-04
2270 uukruuu uugcuuu 3.758 8.56e-05
2283 uukruuu uugauuu 3.868 5.49e-05
2286 uukruuu auuuuuu 3.198 6.92e-04
2287 uukruuu uuuuuuu 3.593 1.63e-04
2296 uukruuu auuguuu 3.440 2.91e-04
2297 uukruuu uuguuuu 3.637 1.38e-04
Protein: IGF2BP2(Hs/Mm)
Sequence Position Motif K-mer Z-score P-value
931 vmahwca aaaaaca 2.479 6.59e-03
1756 vmahwca gcauaca 2.137 1.63e-02
1835 vmahwca ugaaaca 2.589 4.81e-03
1837 vmahwca aaacaca 2.849 2.19e-03
1841 vmahwca acaaacu 2.603 4.62e-03
1919 vmahwca gcaauca 2.027 2.13e-02
1942 vmahwca aaaugca 2.000 2.27e-02
2308 vmahwca aaaaaua 2.603 4.62e-03
Protein: IGF2BP3(Hs/Mm)
Sequence Position Motif K-mer Z-score P-value
931 amahwca aaaaaca 2.373 8.82e-03
1837 amahwca aaacaca 2.537 5.59e-03
1839 amahwca acacaaa 2.284 1.12e-02
1841 amahwca acaaacu 2.134 1.64e-02
1942 amahwca aaaugca 1.881 3.00e-02
2308 amahwca aaaaaua 2.612 4.50e-03
2310 amahwca aaauaaa 2.657 3.94e-03
Protein: KHDRBS1(Hs/Mm)
Sequence Position Motif K-mer Z-score P-value
1742 auaaaav uuaaaaa 2.691 3.56e-03
1744 auaaaav aaaaaag 2.629 4.28e-03
2105 auaaaav uuaaaaa 2.887 1.94e-03
2107 auaaaav aaaaaau 2.711 3.35e-03
2151 auaaaav auuaaau 3.072 1.06e-03
2152 auaaaav uuaaaug 2.825 2.36e-03
2168 auaaaav uuaauaa 2.804 2.52e-03
2171 auaaaav auaaaac 3.392 3.47e-04
2238 auaaaav auaaacc 1.866 3.10e-02
2305 auaaaav agaaaaa 2.979 1.45e-03
2307 auaaaav aaaaaau 2.876 2.01e-03
2312 auaaaav auaaaau 3.268 5.42e-04
Protein: KHDRBS2(Hs/Mm)
Sequence Position Motif K-mer Z-score P-value
1741 rauaaam cuuaaaa 1.659 4.86e-02
1743 rauaaam uaaaaaa 1.647 4.98e-02
2104 rauaaam uuuaaaa 1.671 4.74e-02
2106 rauaaam uaaaaaa 1.671 4.74e-02
2150 rauaaam cauuaaa 2.800 2.56e-03
2170 rauaaam aauaaaa 3.165 7.75e-04
2304 rauaaam uagaaaa 3.035 1.20e-03
2306 rauaaam gaaaaaa 3.282 5.15e-04
2311 rauaaam aauaaaa 3.600 1.59e-04
Protein: KHDRBS3(Hs/Mm)
Sequence Position Motif K-mer Z-score P-value
1741 auaaav cuuaaa 2.113 1.73e-02
1743 auaaav uaaaaa 2.113 1.73e-02
1744 auaaav aaaaaa 2.151 1.57e-02
1757 auaaav cauaca 2.113 1.73e-02
1928 auaaav uaugaa 1.849 3.22e-02
2104 auaaav uuuaaa 1.717 4.30e-02
2106 auaaav uaaaaa 1.717 4.30e-02
2107 auaaav aaaaaa 1.755 3.96e-02
2138 auaaav uguaaa 2.330 9.90e-03
2150 auaaav cauuaa 2.811 2.47e-03
2151 auaaav auuaaa 2.868 2.07e-03
2157 auaaav uguaaa 2.811 2.47e-03
2161 auaaav aauaac 2.868 2.07e-03
2170 auaaav aauaaa 3.151 8.14e-04
2304 auaaav uagaaa 2.887 1.94e-03
2306 auaaav gaaaaa 3.132 8.68e-04
2307 auaaav aaaaaa 2.943 1.63e-03
2311 auaaav aauaaa 3.387 3.53e-04
2316 auaaav aauaac 2.943 1.63e-03
Protein: LIN28A(Hs/Mm)
Sequence Position Motif K-mer Z-score P-value
86 hggagwa gggaaaa 1.811 3.51e-02
97 hggagwa cggaggg 2.324 1.01e-02
635 hggagwa aggagga 1.878 3.02e-02
638 hggagwa aggagaa 3.135 8.59e-04
851 hggagwa uggagau 2.541 5.53e-03
873 hggagwa gggagga 3.000 1.35e-03
876 hggagwa aggagac 3.122 8.98e-04
884 hggagwa uggugaa 2.365 9.02e-03
1313 hggagwa aggagga 2.324 1.01e-02
1332 hggagwa ggaagaa 2.703 3.44e-03
1607 hggagwa aggagaa 3.054 1.13e-03
1621 hggagwa aggcgaa 3.135 8.59e-04
1651 hggagwa aggagga 2.716 3.30e-03
1781 hggagwa aggagca 2.135 1.64e-02
Protein: MATR3(Hs/Mm)
Sequence Position Motif K-mer Z-score P-value
343 maucuur aaacuuu 1.784 3.72e-02
1843 maucuur aaacuug 1.797 3.62e-02
1862 maucuur acucuug 1.757 3.95e-02
1968 maucuur aaccuug 1.716 4.31e-02
1979 maucuur agucuug 1.716 4.31e-02
2061 maucuur caucuuu 2.459 6.97e-03
2128 maucuur aauguuu 2.081 1.87e-02
2142 maucuur aauauug 2.284 1.12e-02
2266 maucuur cauuuug 2.203 1.38e-02
Protein: MBNL1(Hs/Mm)
Sequence Position Motif K-mer Z-score P-value
47 ygcuky uccugc 2.294 1.09e-02
50 ygcuky ugccuc 2.294 1.09e-02
67 ygcuky ggcuuc 2.196 1.40e-02
78 gcuugc ggcuug 1.974 2.42e-02
112 ygcuky cgcuga 1.892 2.92e-02
128 ygcuky cgguuu 2.755 2.93e-03
129 ygcuky gguuuu 1.990 2.33e-02
135 ygcuky cggggc 2.029 2.12e-02
138 ygcuky ggcuuu 2.657 3.94e-03
152 ygcuky cgcugu 3.088 1.01e-03
155 ygcuky uguagu 1.784 3.72e-02
160 ygcuky uaauuc 1.784 3.72e-02
226 ygcuky agcugc 2.402 8.15e-03
229 ygcuky ugcgcu 1.784 3.72e-02
231 ygcuky cgcugc 2.814 2.45e-03
234 ygcuky ugcggg 1.843 3.27e-02
238 ygcuky ggcguc 1.843 3.27e-02
242 ygcuky uccugg 1.843 3.27e-02
273 ygcuky ggcuuc 2.275 1.15e-02
278 ygcuky cgccuc 2.284 1.12e-02
298 ygcuky cgcuga 2.294 1.09e-02
330 ygcuky ugccgc 2.088 1.84e-02
333 ygcuky cgcauc 2.088 1.84e-02
432 ygcuky uucugc 2.294 1.09e-02
437 ygcuky cccauu 2.039 2.07e-02
438 ygcuky ccauuu 2.039 2.07e-02
449 ygcuky cacuuc 3.059 1.11e-03
454 ygcuky ccccgc 2.275 1.15e-02
457 ygcuky cgccgc 3.059 1.11e-03
460 ygcuky cgcugc 3.618 1.48e-04
473 ygcuky cgcuuc 3.706 1.05e-04
476 ygcuky uucucu 2.284 1.12e-02
478 ygcuky cucuga 2.284 1.12e-02
486 ygcuky ggcucu 2.069 1.93e-02
488 ygcuky cucucc 2.069 1.93e-02
490 ygcuky cuccuu 2.069 1.93e-02
491 gcuugc uccuug 2.883 1.97e-03
492 ygcuky ccuugc 2.069 1.93e-02
495 ygcuky ugcagc 2.863 2.10e-03
498 ygcuky agcugc 2.863 2.10e-03
501 ygcuky ugcuua 2.402 8.15e-03
509 ygcuky cgcugg 2.402 8.15e-03
554 ygcuky cgaugc 2.069 1.93e-02
571 ygcuky agcuuc 1.990 2.33e-02
608 ygcuky cggugc 2.294 1.09e-02
611 ygcuky ugcagc 2.294 1.09e-02
625 ygcuky uacugc 2.294 1.09e-02
671 ygcuky agcugc 2.078 1.89e-02
674 ygcuky ugcagc 2.069 1.93e-02
716 ygcuky agcugc 2.500 6.21e-03
719 ygcuky ugcugc 2.912 1.80e-03
728 ygcuky ccccgc 2.039 2.07e-02
731 ygcuky cgcccc 2.039 2.07e-02
734 ygcuky cccugu 2.843 2.23e-03
748 ygcuky cgccgc 2.402 8.15e-03
751 ygcuky cgcucc 2.402 8.15e-03
758 ygcuky ggcucu 1.676 4.69e-02
760 ygcuky cucugc 2.451 7.12e-03
763 ygcuky ugcucg 1.657 4.88e-02
767 ygcuky cgcccu 1.676 4.69e-02
769 ygcuky cccucc 1.676 4.69e-02
772 ygcuky uccuac 1.676 4.69e-02
775 ygcuky uacguu 1.676 4.69e-02
777 ygcuky cguugc 2.451 7.12e-03
780 ygcuky ugcggu 2.451 7.12e-03
790 ygcuky cccuuc 2.392 8.38e-03
797 ygcuky cccuuc 2.392 8.38e-03
848 gcuugc agcugg 2.130 1.66e-02
866 ygcuky agcugc 1.892 2.92e-02
869 ygcuky ugcugg 1.892 2.92e-02
964 ygcuky ggcuuc 2.088 1.84e-02
975 ygcuky cgccgc 2.088 1.84e-02
983 gcuugc agcucg 2.078 1.89e-02
1051 ygcuky cgcggc 2.088 1.84e-02
1066 ygcuky ugcucc 2.088 1.84e-02
1101 ygcuky cgccgc 2.373 8.82e-03
1104 ygcuky cgccgc 2.373 8.82e-03
1107 ygcuky cgccuc 2.392 8.38e-03
1117 ygcuky ugcauc 2.392 8.38e-03
1174 ygcuky uccugc 2.245 1.24e-02
1179 ygcuky cgccuc 2.284 1.12e-02
1197 ygcuky cgccuu 2.402 8.15e-03
1198 ygcuky gccuuc 1.657 4.88e-02
1220 ygcuky cucugc 2.294 1.09e-02
1223 ygcuky ugcucu 2.098 1.80e-02
1268 ygcuky uggugc 2.039 2.07e-02
1271 ygcuky ugcucc 1.990 2.33e-02
1341 ygcuky cgaugu 2.196 1.40e-02
1344 ygcuky uguugu 2.294 1.09e-02
1347 ygcuky uguuuc 2.353 9.31e-03
1350 ygcuky uucugu 2.353 9.31e-03
1401 ygcuky uucugc 2.039 2.07e-02
1404 ygcuky ugcugg 2.069 1.93e-02
1482 ygcuky cgcagc 1.990 2.33e-02
1487 ygcuky cgccuc 2.196 1.40e-02
1491 ygcuky ucccuc 1.990 2.33e-02
1492 ygcuky cccucc 1.941 2.61e-02
1512 ygcuky uccugc 2.500 6.21e-03
1515 ygcuky ugcugc 2.706 3.41e-03
1672 ygcuky agcuuu 2.069 1.93e-02
1682 ygcuky cccugc 2.078 1.89e-02
1892 ygcuky cgauuc 1.892 2.92e-02
1896 ygcuky uccuuc 1.686 4.59e-02
1945 gcuugc ugcaug 2.143 1.61e-02
1969 gcuugc accuug 2.273 1.15e-02
2054 ygcuky ugcuua 2.098 1.80e-02
2073 ygcuky uucuuu 2.098 1.80e-02
2130 ygcuky uguuuc 2.039 2.07e-02
2135 ygcuky cucugu 2.039 2.07e-02
2246 ygcuky uaauuu 1.676 4.69e-02
2249 ygcuky uuuuuu 1.686 4.59e-02
2250 ygcuky uuuuuu 1.686 4.59e-02
2251 ygcuky uuuuuu 1.686 4.59e-02
2255 ygcuky uuauuu 1.686 4.59e-02
2264 ygcuky uacauu 1.892 2.92e-02
2266 ygcuky cauuuu 1.892 2.92e-02
2268 ygcuky uuuugc 1.892 2.92e-02
2271 ygcuky ugcuuu 2.912 1.80e-03
2273 ygcuky cuuuuu 1.990 2.33e-02
2284 ygcuky ugauuu 2.706 3.41e-03
2287 ygcuky uuuuuu 1.990 2.33e-02
2288 ygcuky uuuuuu 1.990 2.33e-02
2289 ygcuky uuuuuc 1.990 2.33e-02
2292 ygcuky uucuau 1.990 2.33e-02
2295 ygcuky uauugu 1.990 2.33e-02
2298 ygcuky uguuuu 2.078 1.89e-02
Protein: MSI1(Hs/Mm)
Sequence Position Motif K-mer Z-score P-value
2208 uaguwrg uaguaua 2.985 1.42e-03
2215 uaguwrg uaguacc 2.818 2.42e-03
2222 uaguwrg uaguauu 2.818 2.42e-03
2230 uaguwrg uagguac 2.879 1.99e-03
Protein: NOVA1(Hs/Mm)
Sequence Position Motif K-mer Z-score P-value
926 ycay ucau 2.750 2.98e-03
938 ycay ucau 2.750 2.98e-03
941 ycay ucau 2.750 2.98e-03
1275 ycay ccau 2.750 2.98e-03
1292 ycay ccac 2.750 2.98e-03
1295 ycay ccac 2.750 2.98e-03
1413 ycay ccac 3.380 3.62e-04
1428 ycay ucac 2.750 2.98e-03
1435 ycay ccac 3.380 3.62e-04
1455 ycay ccac 2.750 2.98e-03
Protein: PABPC1(Hs/Mm)
Sequence Position Motif K-mer Z-score P-value
87 araaaam ggaaaaa 2.608 4.55e-03
89 araaaam aaaaaga 2.539 5.56e-03
90 araaaam aaaagaa 2.392 8.38e-03
929 araaaam ucaaaaa 2.314 1.03e-02
931 araaaam aaaaaca 2.392 8.38e-03
1335 araaaam agaaauc 2.186 1.44e-02
1707 araaaam ggaaaac 2.324 1.01e-02
1709 araaaam aaaacaa 2.324 1.01e-02
1742 araaaam uuaaaaa 2.333 9.82e-03
1743 araaaam uaaaaaa 2.490 6.39e-03
1744 araaaam aaaaaag 2.490 6.39e-03
1875 araaaam aggaaaa 2.392 8.38e-03
1885 araaaam aggaaaa 2.667 3.83e-03
1886 araaaam ggaaaac 2.569 5.10e-03
2037 araaaam auaaaag 1.735 4.14e-02
2039 araaaam aaaagaa 1.745 4.05e-02
2105 araaaam uuaaaaa 2.353 9.31e-03
2106 araaaam uaaaaaa 2.510 6.04e-03
2107 araaaam aaaaaau 2.539 5.56e-03
2305 araaaam agaaaaa 3.598 1.60e-04
2306 araaaam gaaaaaa 3.284 5.12e-04
2307 araaaam aaaaaau 3.333 4.30e-04
2308 araaaam aaaaaua 3.225 6.30e-04
2309 araaaam aaaauaa 3.098 9.74e-04
2310 araaaam aaauaaa 3.098 9.74e-04
2311 araaaam aauaaaa 3.098 9.74e-04
2312 araaaam auaaaau 3.157 7.97e-04
2314 araaaam aaaauaa 3.098 9.74e-04
Protein: PABPC3(Hs/Mm)
Sequence Position Motif K-mer Z-score P-value
88 raaaacm gaaaaag 1.989 2.34e-02
89 raaaacm aaaaaga 1.943 2.60e-02
532 raaaacm gaaaacc 2.909 1.81e-03
533 raaaacm aaaacca 2.307 1.05e-02
931 raaaacm aaaaaca 1.761 3.91e-02
1357 raaaacm gaaaaga 2.080 1.88e-02
1708 raaaacm gaaaaca 2.818 2.42e-03
1717 raaaacm gaaaagg 2.386 8.52e-03
1743 raaaacm uaaaaaa 2.432 7.51e-03
1744 raaaacm aaaaaag 2.375 8.77e-03
1745 raaaacm aaaaagc 2.591 4.78e-03
1746 raaaacm aaaagcc 2.523 5.82e-03
1817 raaaacm ggaaacg 2.625 4.33e-03
1826 raaaacm gagaaca 2.784 2.68e-03
1837 raaaacm aaacaca 2.659 3.92e-03
1877 raaaacm gaaaagu 2.273 1.15e-02
1887 raaaacm gaaaacg 2.591 4.78e-03
2106 raaaacm uaaaaaa 1.784 3.72e-02
2107 raaaacm aaaaaau 1.750 4.01e-02
2108 raaaacm aaaaauu 1.750 4.01e-02
2306 raaaacm gaaaaaa 2.943 1.63e-03
2307 raaaacm aaaaaau 2.648 4.05e-03
2308 raaaacm aaaaaua 2.818 2.42e-03
2313 raaaacm uaaaaua 2.716 3.30e-03
Protein: PABPC4(Hs/Mm)
Sequence Position Motif K-mer Z-score P-value
87 aaaaaar ggaaaaa 2.609 4.54e-03
88 aaaaaar gaaaaag 2.736 3.11e-03
89 aaaaaar aaaaaga 2.945 1.61e-03
90 aaaaaar aaaagaa 2.818 2.42e-03
929 aaaaaar ucaaaaa 2.291 1.10e-02
930 aaaaaar caaaaac 2.391 8.40e-03
931 aaaaaar aaaaaca 2.609 4.54e-03
1357 aaaaaar gaaaaga 2.245 1.24e-02
1358 aaaaaar aaaagag 2.182 1.46e-02
1708 aaaaaar gaaaaca 2.227 1.30e-02
1709 aaaaaar aaaacaa 2.318 1.02e-02
1743 aaaaaar uaaaaaa 2.791 2.63e-03
1744 aaaaaar aaaaaag 2.882 1.98e-03
1745 aaaaaar aaaaagc 2.600 4.66e-03
2037 aaaaaar auaaaag 2.455 7.04e-03
2038 aaaaaar uaaaaga 2.409 8.00e-03
2039 aaaaaar aaaagaa 2.545 5.46e-03
2106 aaaaaar uaaaaaa 2.709 3.37e-03
2107 aaaaaar aaaaaau 2.736 3.11e-03
2108 aaaaaar aaaaauu 2.473 6.70e-03
2170 aaaaaar aauaaaa 2.464 6.87e-03
2171 aaaaaar auaaaac 2.336 9.75e-03
2305 aaaaaar agaaaaa 3.355 3.97e-04
2306 aaaaaar gaaaaaa 3.364 3.84e-04
2307 aaaaaar aaaaaau 3.364 3.84e-04
2308 aaaaaar aaaaaua 3.391 3.48e-04
2309 aaaaaar aaaauaa 3.182 7.31e-04
2310 aaaaaar aaauaaa 3.182 7.31e-04
2311 aaaaaar aauaaaa 3.182 7.31e-04
2312 aaaaaar auaaaau 2.864 2.09e-03
2313 aaaaaar uaaaaua 2.936 1.66e-03
2314 aaaaaar aaaauaa 3.182 7.31e-04
Protein: PABPC5(Hs/Mm)
Sequence Position Motif K-mer Z-score P-value
1323 agaaadu agaagau 2.125 1.68e-02
1335 agaaadu agaaauc 2.636 4.19e-03
1356 agaaadu ggaaaag 1.795 3.63e-02
1707 agaaadu ggaaaac 1.682 4.63e-02
1876 agaaadu ggaaaag 2.227 1.30e-02
1886 agaaadu ggaaaac 2.602 4.63e-03
1906 agaaadu agaaaug 1.966 2.46e-02
2042 agaaadu agaacuu 1.659 4.86e-02
2107 agaaadu aaaaaau 1.648 4.97e-02
2305 agaaadu agaaaaa 3.091 9.97e-04
2307 agaaadu aaaaaau 3.125 8.89e-04
2308 agaaadu aaaaaua 2.568 5.11e-03
2312 agaaadu auaaaau 3.034 1.21e-03
Protein: PABPN1(Hs/Mm)
Sequence Position Motif K-mer Z-score P-value
1320 araaga acaaga 3.185 7.24e-04
1323 araaga agaaga 3.454 2.76e-04
1326 araaga agauga 3.028 1.23e-03
1332 araaga ggaaga 3.120 9.04e-04
1358 araaga aaaaga 2.537 5.59e-03
1709 araaga aaaaca 2.065 1.95e-02
1776 araaga agcaga 2.565 5.16e-03
1779 araaga agagga 2.704 3.43e-03
1800 araaga ugaaga 2.750 2.98e-03
1803 araaga agagga 2.889 1.93e-03
1827 araaga agaaca 2.194 1.41e-02
2305 araaga agaaaa 2.944 1.62e-03
2307 araaga aaaaaa 2.787 2.66e-03
2309 araaga aaaaua 2.676 3.73e-03
2312 araaga auaaaa 2.611 4.51e-03
2314 araaga aaaaua 2.676 3.73e-03
Protein: PCBP1(Hs/Mm)
Sequence Position Motif K-mer Z-score P-value
287 ccwwhcc cccagcc 2.506 6.11e-03
288 ccwwhcc ccagccc 2.506 6.11e-03
292 ccwwhcc cccuccc 2.688 3.59e-03
307 ccwwhcc cccagcc 2.974 1.47e-03
327 ccwwhcc ccuugcc 2.909 1.81e-03
724 ccwwhcc cccaccc 3.169 7.65e-04
725 ccwwhcc ccacccc 3.091 9.97e-04
735 ccwwhcc ccugucc 3.455 2.75e-04
742 ccwwhcc ccuagcc 3.442 2.89e-04
750 ccwwhcc ccgcucc 2.948 1.60e-03
1136 ccwwhcc ucuuccc 2.390 8.42e-03
1141 ccwwhcc cccuacc 2.727 3.20e-03
1142 ccwwhcc ccuaccc 2.753 2.95e-03
1241 ccwwhcc ccucccc 2.013 2.21e-02
Protein: PCBP2(Hs/Mm)
Sequence Position Motif K-mer Z-score P-value
31 ccyycch ccguccc 2.912 1.80e-03
40 ccyycch gcucccc 2.700 3.47e-03
44 ccyycch cccuccu 2.825 2.36e-03
48 ccyycch ccugccu 2.675 3.74e-03
292 ccyycch cccuccc 2.463 6.89e-03
293 ccyycch ccucccg 2.250 1.22e-02
450 ccyycch acuuccc 2.088 1.84e-02
451 ccyycch cuucccc 2.050 2.02e-02
724 ccyycch cccaccc 2.962 1.53e-03
725 ccyycch ccacccc 2.925 1.72e-03
729 ccyycch cccgccc 2.925 1.72e-03
730 ccyycch ccgcccc 2.925 1.72e-03
1136 ccyycch ucuuccc 3.075 1.05e-03
1137 ccyycch cuucccc 2.950 1.59e-03
1141 ccyycch cccuacc 2.850 2.19e-03
1142 ccyycch ccuaccc 3.163 7.81e-04
1489 ccyycch ccucccu 2.562 5.20e-03
1492 ccyycch cccucca 2.538 5.57e-03
Protein: PCBP3(Hs/Mm)
Sequence Position Motif K-mer Z-score P-value
328 uuuycc cuugcc 1.865 3.11e-02
346 uuuycc cuuugc 2.486 6.46e-03
371 uuuycc cuuugc 1.959 2.51e-02
450 uuuycc acuucc 1.811 3.51e-02
451 uuuycc cuuccc 1.811 3.51e-02
Protein: PPRC1(Hs/Mm)
Sequence Position Motif K-mer Z-score P-value
184 ssgcgcs gcgagcg 2.026 2.14e-02
188 ssgcgcs gcgggcg 2.026 2.14e-02
235 ssgcgcs gcgggcg 2.462 6.91e-03
728 ssgcgcs ccccgcc 2.064 1.95e-02
1016 ssgcgcs cugcgcg 1.705 4.41e-02
1018 ssgcgcs gcgcgca 1.744 4.06e-02
1044 ssgcgcs ccccgcc 2.795 2.60e-03
1046 ssgcgcs ccgcccg 2.795 2.60e-03
1048 ssgcgcs gcccgcg 2.936 1.66e-03
1098 ssgcgcs gagcgcc 2.115 1.72e-02
1176 ssgcgcs cugcgcc 2.282 1.12e-02
Protein: PTBP1(Hs/Mm)
Sequence Position Motif K-mer Z-score P-value
140 cucucu cuuuau 1.884 2.98e-02
142 cucucu uuaucu 1.884 2.98e-02
146 cucucu cuaacu 1.884 2.98e-02
150 cucucu cucgcu 2.259 1.19e-02
152 cucucu cgcugu 1.884 2.98e-02
408 cucucu gacucu 1.741 4.08e-02
410 cucucu cucucc 2.107 1.76e-02
412 cucucu cucccg 1.741 4.08e-02
471 cucucu cccgcu 2.098 1.80e-02
476 cucucu uucucu 2.652 4.00e-03
478 cucucu cucuga 2.098 1.80e-02
486 cucucu ggcucu 2.098 1.80e-02
488 cucucu cucucc 2.652 4.00e-03
490 cucucu cuccuu 2.098 1.80e-02
788 cucucu cacccu 1.920 2.74e-02
791 cucucu ccuucu 1.911 2.80e-02
793 cucucu uucucc 1.884 2.98e-02
795 cucucu cucccu 2.214 1.34e-02
1126 cucucu cccucg 2.027 2.13e-02
1128 cucucu cucggu 2.027 2.13e-02
1136 ucuu ucuu 2.161 1.53e-02
1146 cucucu cccucu 2.625 4.33e-03
1148 cucucu cucuca 2.625 4.33e-03
1149 ucuu ucuc 1.884 2.98e-02
1164 cucucu cucgcc 2.027 2.13e-02
1182 cucucu cucgca 2.098 1.80e-02
1199 cucucu ccuucu 2.205 1.37e-02
1201 cucucu uucucu 2.955 1.56e-03
1203 cucucu cucucc 2.955 1.56e-03
1205 cucucu cuccgu 2.250 1.22e-02
1218 cucucu uucucu 2.955 1.56e-03
1220 cucucu cucugc 2.250 1.22e-02
1223 cucucu ugcucu 2.250 1.22e-02
1225 cucucu cucucc 2.946 1.61e-03
1242 cucucu cucccc 2.071 1.92e-02
1490 cucucu cucccu 2.205 1.37e-02
1492 cucucu cccucc 1.839 3.30e-02
1497 cucucu cacucg 1.839 3.30e-02
1509 cucucu cuaucc 1.839 3.30e-02
1864 ucuu ucuu 2.134 1.64e-02
1981 ucuu ucuu 2.161 1.53e-02
2045 ucuu acuu 2.161 1.53e-02
2047 ucuu uuuu 2.161 1.53e-02
2048 ucuu uuuu 2.161 1.53e-02
2049 ucuu uuuu 2.446 7.22e-03
2055 ucuu gcuu 2.446 7.22e-03
2063 ucuu ucuu 3.277 5.25e-04
2065 ucuu uuuu 2.446 7.22e-03
2066 ucuu uuuu 2.446 7.22e-03
2067 ucuu uuuu 2.446 7.22e-03
2068 ucuu uuuu 2.446 7.22e-03
2069 ucuu uuuu 2.446 7.22e-03
2070 ucuu uuuu 2.446 7.22e-03
2071 ucuu uuuu 2.446 7.22e-03
2074 ucuu ucuu 3.277 5.25e-04
2089 ucuu uauu 2.161 1.53e-02
2131 cucucu guuucu 1.893 2.92e-02
2133 cucucu uucucu 2.455 7.04e-03
2135 cucucu cucugu 2.455 7.04e-03
Protein: PUM2(Hs/Mm)
Sequence Position Motif K-mer Z-score P-value
117 uguanaua aguauaaa 1.864 3.12e-02
141 uguanaua uuuaucua 1.773 3.81e-02
2087 uguanaua uguauuua 2.989 1.40e-03
2100 uguanaua uguuuuua 2.852 2.17e-03
2104 uguanaua uuuaaaaa 2.830 2.33e-03
2138 uguanaua uguaaaua 4.295 8.73e-06
2157 uguanaua uguaaaua 4.375 6.07e-06
2209 uguanaua aguauaua 2.761 2.88e-03
2254 uguanaua uuuauuua 2.534 5.64e-03
2258 uguanaua uuuaagua 2.511 6.02e-03
2262 uguanaua aguacauu 2.568 5.11e-03
2298 uguanaua uguuuuua 2.409 8.00e-03
2323 uguanaua ggcaaaua 1.739 4.10e-02
Protein: QKI(Hs/Mm)
Sequence Position Motif K-mer Z-score P-value
1900 acuaay ucuaac 2.022 2.16e-02
2151 acuaay auuaaa 2.467 6.81e-03
2161 acuaay aauaac 2.641 4.13e-03
2170 acuaay aauaaa 2.609 4.54e-03
2238 acuaay auaaac 1.793 3.65e-02
Protein: RALY(Hs/Mm)
Sequence Position Motif K-mer Z-score P-value
515 uuuuuub auuuuuu 3.080 1.03e-03
516 uuuuuub uuuuuuu 3.438 2.93e-04
517 uuuuuub uuuuuuc 3.429 3.03e-04
518 uuuuuub uuuuucg 3.268 5.42e-04
1674 uuuuuub cuuuuuu 2.420 7.76e-03
1675 uuuuuub uuuuuug 2.795 2.60e-03
1676 uuuuuub uuuuugc 2.446 7.22e-03
2046 uuuuuub cuuuuuu 3.330 4.34e-04
2047 uuuuuub uuuuuua 3.750 8.84e-05
2048 uuuuuub uuuuuau 3.321 4.48e-04
2049 uuuuuub uuuuaug 3.438 2.93e-04
2063 uuuuuub ucuuuuu 3.205 6.75e-04
2064 uuuuuub cuuuuuu 3.330 4.34e-04
2065 uuuuuub uuuuuuu 3.821 6.65e-05
2066 uuuuuub uuuuuuu 3.821 6.65e-05
2067 uuuuuub uuuuuuu 3.821 6.65e-05
2068 uuuuuub uuuuuuu 3.821 6.65e-05
2069 uuuuuub uuuuuuc 3.812 6.89e-05
2070 uuuuuub uuuuucu 3.375 3.69e-04
2071 uuuuuub uuuucuu 3.205 6.75e-04
2072 uuuuuub uuucuuu 3.205 6.75e-04
2073 uuuuuub uucuuua 3.125 8.89e-04
2099 uuuuuub uuguuuu 2.420 7.76e-03
2100 uuuuuub uguuuuu 2.420 7.76e-03
2101 uuuuuub guuuuua 2.455 7.04e-03
2102 uuuuuub uuuuuaa 2.446 7.22e-03
2248 uuuuuub auuuuuu 3.312 4.63e-04
2249 uuuuuub uuuuuuu 3.696 1.10e-04
2250 uuuuuub uuuuuuu 3.696 1.10e-04
2251 uuuuuub uuuuuua 3.643 1.35e-04
2252 uuuuuub uuuuuau 3.250 5.77e-04
2253 uuuuuub uuuuauu 3.143 8.36e-04
2254 uuuuuub uuuauuu 3.143 8.36e-04
2255 uuuuuub uuauuua 3.071 1.07e-03
2273 uuuuuub cuuuuua 3.241 5.96e-04
2274 uuuuuub uuuuuaa 3.241 5.96e-04
2286 uuuuuub auuuuuu 3.286 5.08e-04
2287 uuuuuub uuuuuuu 3.643 1.35e-04
2288 uuuuuub uuuuuuc 3.634 1.40e-04
2289 uuuuuub uuuuucu 3.286 5.08e-04
2290 uuuuuub uuuucua 3.045 1.16e-03
2297 uuuuuub uuguuuu 3.116 9.17e-04
2298 uuuuuub uguuuuu 3.116 9.17e-04
2299 uuuuuub guuuuua 3.161 7.86e-04
2300 uuuuuub uuuuuag 3.420 3.13e-04
Protein: RBM28(Hs/Mm)
Sequence Position Motif K-mer Z-score P-value
634 gwguagd gaggagg 2.236 1.27e-02
Protein: RBM3(Hs/Mm)
Sequence Position Motif K-mer Z-score P-value
1818 radacka gaaacga 1.737 4.12e-02
Protein: RBM4(Hs/Mm)
Sequence Position Motif K-mer Z-score P-value
184 gcgcgss gcgagcg 3.044 1.17e-03
186 gcgcgss gagcggg 3.209 6.66e-04
188 gcgcgss gcgggcg 3.099 9.71e-04
190 gcgcgss gggcggc 3.066 1.08e-03
230 gcgcgss gcgcugc 2.593 4.76e-03
235 gcgcgss gcgggcg 2.582 4.91e-03
360 gcgcgss gcgggcg 2.253 1.21e-02
362 gcgcgss gggcggg 2.363 9.06e-03
418 gcgcgss acgcggg 1.692 4.53e-02
824 gcgcgss gcgggag 1.802 3.58e-02
Protein: RBM41(Hs/Mm)
Sequence Position Motif K-mer Z-score P-value
2072 wuacwuk uuucuuu 1.728 4.20e-02
2152 wuacwuk uuaaaug 2.173 1.49e-02
2163 wuacwuk uaacuuu 2.259 1.19e-02
2263 wuacwuk guacauu 3.025 1.24e-03
2270 wuacwuk uugcuuu 2.679 3.69e-03
Protein: RBM42(Hs/Mm)
Sequence Position Motif K-mer Z-score P-value
586 aacuamg aacuaug 2.486 6.46e-03
598 aacuamg gacuacg 2.243 1.24e-02
1880 aacuamg aaguaag 2.365 9.02e-03
2160 aacuamg aaauaac 1.811 3.51e-02
2310 aacuamg aaauaaa 2.000 2.27e-02
2315 aacuamg aaauaac 2.000 2.27e-02
Protein: RBM45(Hs/Mm)
Sequence Position Motif K-mer Z-score P-value
808 gacgamv gacaacg 3.067 1.08e-03
811 gacgamv aacgacg 3.233 6.12e-04
814 gacgamv gacggcg 3.583 1.70e-04
913 gacgamv gacgacg 2.400 8.20e-03
916 gacgamv gacgaga 2.167 1.51e-02
1315 gacgamv gaggaac 2.167 1.51e-02
1333 gacgamv gaagaaa 2.267 1.17e-02
1606 gacgamv gaggaga 1.883 2.99e-02
1804 gacgamv gaggacu 3.633 1.40e-04
1820 gacgamv aacgacg 3.367 3.80e-04
1823 gacgamv gacgaga 3.533 2.05e-04
Protein: RBM46(Hs/Mm)
Sequence Position Motif K-mer Z-score P-value
927 rausawd caucaaa 1.974 2.42e-02
1714 rausawd aaugaaa 1.671 4.74e-02
1921 rausawd aaucacc 2.013 2.21e-02
1928 rausawd uaugaac 2.526 5.77e-03
1943 rausawd aaugcau 2.763 2.86e-03
1950 rausawd gaucaaa 2.724 3.22e-03
2161 rausawd aauaacu 2.395 8.31e-03
2170 rausawd aauaaaa 2.618 4.42e-03
2311 rausawd aauaaaa 2.237 1.26e-02
2316 rausawd aauaacu 1.987 2.35e-02
Protein: RBM5(Hs/Mm)
Sequence Position Motif K-mer Z-score P-value
84 garggwr gcgggaa 2.859 2.12e-03
99 garggwr gagggag 3.167 7.70e-04
103 garggwr gagggau 3.128 8.80e-04
248 garggwr gaaggga 2.359 9.16e-03
1873 garggwr uaaggaa 2.513 5.99e-03
Protein: RBM6(Hs/Mm)
Sequence Position Motif K-mer Z-score P-value
942 hauccar cauccag 2.183 1.45e-02
1748 hauccar aagccac 2.958 1.55e-03
1761 hauccar cauccug 3.127 8.83e-04
1770 hauccar cguccaa 2.789 2.64e-03
1943 hauccar aaugcau 2.070 1.92e-02
1955 hauccar aaugcaa 2.169 1.50e-02
Protein: RBM8A(Hs/Mm)
Sequence Position Motif K-mer Z-score P-value
184 rygcgcb gcgagcg 3.541 1.99e-04
188 rygcgcb gcgggcg 3.568 1.80e-04
214 rygcgcb ccgggcg 3.189 7.14e-04
228 rygcgcb cugcgcu 3.027 1.23e-03
235 rygcgcb gcgggcg 3.297 4.89e-04
360 rygcgcb gcgggcg 2.541 5.53e-03
364 rygcgcb gcgggca 2.284 1.12e-02
668 rygcgcb gcgagcu 2.459 6.97e-03
685 rygcgcb gcgccca 2.459 6.97e-03
1016 rygcgcb cugcgcg 1.878 3.02e-02
1018 rygcgcb gcgcgca 2.027 2.13e-02
Protein: RBMS1(Hs/Mm)
Sequence Position Motif K-mer Z-score P-value
2119 kauauas gauuuac 2.452 7.10e-03
2121 kauauas uuuacac 2.356 9.24e-03
2140 kauauas uaaauau 2.575 5.01e-03
2142 kauauas aauauug 2.658 3.93e-03
2159 kauauas uaaauaa 2.781 2.71e-03
2179 kauauas uuuauag 2.781 2.71e-03
2211 kauauas uauauag 2.932 1.68e-03
2237 kauauas uauaaac 2.658 3.93e-03
2256 kauauas uauuuaa 2.164 1.52e-02
Protein: RBMS3(Hs/Mm)
Sequence Position Motif K-mer Z-score P-value
119 hauaua uauaaa 2.333 9.82e-03
2089 hauaua uauuua 1.844 3.26e-02
2140 hauaua uaaaua 2.948 1.60e-03
2142 hauaua aauauu 2.875 2.02e-03
2155 hauaua aaugua 2.771 2.79e-03
2159 hauaua uaaaua 3.094 9.87e-04
2170 hauaua aauaaa 2.688 3.59e-03
2179 hauaua uuuaua 2.865 2.09e-03
2209 hauaua aguaua 2.708 3.38e-03
2211 hauaua uauaua 3.469 2.61e-04
2226 hauaua auuaua 3.146 8.28e-04
2235 hauaua acuaua 3.229 6.21e-04
2237 hauaua uauaaa 3.042 1.18e-03
2256 hauaua uauuua 2.823 2.38e-03
2309 hauaua aaaaua 2.948 1.60e-03
2311 hauaua aauaaa 3.094 9.87e-04
2314 hauaua aaaaua 2.948 1.60e-03
2325 hauaua caaaua 2.896 1.89e-03
Protein: SAMD4A(Hs/Mm)
Sequence Position Motif K-mer Z-score P-value
63 gckgghm gcagggc 2.395 8.31e-03
84 gckgghm gcgggaa 2.407 8.04e-03
188 gckgghm gcgggcg 2.753 2.95e-03
195 gckgghm gccggcu 2.580 4.94e-03
213 gckgghm gccgggc 3.185 7.24e-04
235 gckgghm gcgggcg 2.272 1.15e-02
360 gckgghm gcgggcg 2.284 1.12e-02
364 gckgghm gcgggca 2.333 9.82e-03
849 gckgghm gcuggag 2.765 2.85e-03
870 gckgghm gcuggga 1.654 4.91e-02
999 gckgghm gcuggcc 2.889 1.93e-03
Protein: SART3(Hs/Mm)
Sequence Position Motif K-mer Z-score P-value
87 araaaam ggaaaaa 2.618 4.42e-03
89 araaaam aaaaaga 2.549 5.40e-03
90 araaaam aaaagaa 2.392 8.38e-03
929 araaaam ucaaaaa 2.324 1.01e-02
931 araaaam aaaaaca 2.402 8.15e-03
1335 araaaam agaaauc 2.186 1.44e-02
1707 araaaam ggaaaac 2.333 9.82e-03
1709 araaaam aaaacaa 2.333 9.82e-03
1742 araaaam uuaaaaa 2.343 9.56e-03
1743 araaaam uaaaaaa 2.500 6.21e-03
1744 araaaam aaaaaag 2.500 6.21e-03
1875 araaaam aggaaaa 2.392 8.38e-03
1885 araaaam aggaaaa 2.676 3.73e-03
1886 araaaam ggaaaac 2.569 5.10e-03
2037 araaaam auaaaag 1.745 4.05e-02
2039 araaaam aaaagaa 1.745 4.05e-02
2105 araaaam uuaaaaa 2.363 9.06e-03
2106 araaaam uaaaaaa 2.510 6.04e-03
2107 araaaam aaaaaau 2.539 5.56e-03
2305 araaaam agaaaaa 3.608 1.54e-04
2306 araaaam gaaaaaa 3.284 5.12e-04
2307 araaaam aaaaaau 3.333 4.30e-04
2308 araaaam aaaaaua 3.235 6.08e-04
2309 araaaam aaaauaa 3.098 9.74e-04
2310 araaaam aaauaaa 3.098 9.74e-04
2311 araaaam aauaaaa 3.098 9.74e-04
2312 araaaam auaaaau 3.157 7.97e-04
2314 araaaam aaaauaa 3.098 9.74e-04
Protein: SNRNP70(Hs/Mm)
Sequence Position Motif K-mer Z-score P-value
1167 rwucaag gcccaag 1.740 4.09e-02
1938 rwucaag uuucaaa 2.438 7.38e-03
1950 rwucaag gaucaaa 1.781 3.75e-02
Protein: SNRPA(Hs/Mm)
Sequence Position Motif K-mer Z-score P-value
348 wugcacr uugccca 3.648 1.32e-04
373 wugcacr uugcacu 3.296 4.90e-04
1944 wugcacr augcaug 1.761 3.91e-02
Protein: SRSF1(Hs/Mm)
Sequence Position Motif K-mer Z-score P-value
28 crsmsgw cggccgu 2.389 8.45e-03
98 gragga ggaggg 2.882 1.98e-03
102 gragga ggaggg 2.882 1.98e-03
391 crsmsgw cacccga 2.389 8.45e-03
633 gragga cgagga 2.516 5.93e-03
636 gragga ggagga 2.903 1.85e-03
639 gragga ggagaa 2.452 7.10e-03
703 ugrwgvh uggaaga 1.944 2.59e-02
704 ugrwgvh ggaagaa 1.944 2.59e-02
713 ugrwgvh ucgagcu 1.944 2.59e-02
719 ugrwgvh ugcugcc 1.944 2.59e-02
826 ugrwgvh gggagcu 2.333 9.82e-03
851 ugrwgvh uggagau 3.578 1.73e-04
854 ugrwgvh agauggu 2.833 2.31e-03
857 ugrwgvh uggugac 3.433 2.98e-04
873 ugrwgvh gggagga 3.156 8.00e-04
876 ugrwgvh aggagac 3.156 8.00e-04
884 ugrwgvh uggugaa 2.733 3.14e-03
887 ugrwgvh ugaacca 2.333 9.82e-03
1311 gragga ugagga 3.022 1.26e-03
1313 ugrwgvh aggagga 1.944 2.59e-02
1314 gragga ggagga 3.441 2.90e-04
1323 ugrwgvh agaagau 1.944 2.59e-02
1329 gragga ugagga 3.022 1.26e-03
1332 gragga ggaaga 3.097 9.77e-04
1392 ugrwgvh uggauca 1.744 4.06e-02
1404 ugrwgvh ugcugga 1.744 4.06e-02
1407 ugrwgvh uggaggc 2.133 1.65e-02
1648 crsmsgw cagagga 3.242 5.93e-04
1649 gragga agagga 2.484 6.50e-03
1652 gragga ggagga 2.871 2.05e-03
1656 gragga gaacga 2.312 1.04e-02
1779 gragga agagga 2.129 1.66e-02
1782 gragga ggagca 2.065 1.95e-02
1803 gragga agagga 2.129 1.66e-02
Protein: SRSF10(Hs/Mm)
Sequence Position Motif K-mer Z-score P-value
171 agagavm agaggca 2.265 1.18e-02
177 agagavm agaggga 2.253 1.21e-02
1553 agagavm ugagaca 1.880 3.01e-02
1555 agagavm agacaga 1.831 3.36e-02
1779 agagavm agaggag 1.807 3.54e-02
1803 agagavm agaggac 2.446 7.22e-03
Protein: SRSF2(Hs/Mm)
Sequence Position Motif K-mer Z-score P-value
29 ugcygyy ggccguc 2.939 1.65e-03
32 gryymcyr cgucccug 2.989 1.40e-03
38 ugcygyy uggcucc 2.162 1.53e-02
39 gryymcyr ggcucccc 2.523 5.82e-03
42 ugcygyy uccccuc 2.162 1.53e-02
47 ugcygyy uccugcc 2.707 3.39e-03
50 ugcygyy ugccucg 2.162 1.53e-02
278 ugcygyy cgccucu 1.818 3.45e-02
290 ugcygyy agcccuc 1.929 2.69e-02
295 ugcygyy ucccgcu 2.293 1.09e-02
298 ugcygyy cgcugau 1.929 2.69e-02
301 ugcygyy ugauccc 1.929 2.69e-02
314 ugcygyy agcgguc 2.111 1.74e-02
432 ugcygyy uucugcc 2.646 4.07e-03
435 ugcygyy ugcccau 2.253 1.21e-02
454 ugcygyy ccccgcc 2.253 1.21e-02
457 ugcygyy cgccgcu 2.889 1.93e-03
460 ugcygyy cgcugcc 2.646 4.07e-03
470 ugcygyy acccgcu 2.253 1.21e-02
473 ugcygyy cgcuucu 2.323 1.01e-02
486 ugcygyy ggcucuc 2.111 1.74e-02
495 ugcygyy ugcagcu 2.646 4.07e-03
498 ugcygyy agcugcu 2.535 5.62e-03
506 ugcygyy agacgcu 1.768 3.85e-02
539 ugcygyy agcagcc 1.818 3.45e-02
542 ugcygyy agccucc 1.818 3.45e-02
546 ugcygyy ucccgcg 1.818 3.45e-02
554 ugcygyy cgaugcc 1.818 3.45e-02
557 ugcygyy ugccccu 2.172 1.49e-02
611 ugcygyy ugcagcc 2.172 1.49e-02
614 ugcygyy agccgua 1.818 3.45e-02
622 ugcygyy uucuacu 1.818 3.45e-02
625 ugcygyy uacugcg 1.818 3.45e-02
635 ggagwd aggagg 1.897 2.89e-02
638 ggagwd aggaga 3.080 1.03e-03
671 ugcygyy agcugca 1.818 3.45e-02
674 ugcygyy ugcagcc 1.949 2.56e-02
716 ugcygyy agcugcu 3.071 1.07e-03
719 ugcygyy ugcugcc 3.424 3.09e-04
722 ugcygyy ugcccac 2.646 4.07e-03
728 ugcygyy ccccgcc 2.707 3.39e-03
731 ugcygyy cgccccu 2.707 3.39e-03
734 ugcygyy cccuguc 2.707 3.39e-03
737 ugcygyy ugucccc 2.707 3.39e-03
745 ugcygyy agccgcc 2.758 2.91e-03
748 ugcygyy cgccgcu 2.747 3.01e-03
760 ugcygyy cucugcu 2.253 1.21e-02
763 ugcygyy ugcucgc 2.202 1.38e-02
767 ugcygyy cgcccuc 2.202 1.38e-02
780 ugcygyy ugcgguc 2.293 1.09e-02
826 ggagwd gggagc 2.184 1.45e-02
851 ggagwd uggaga 3.529 2.09e-04
873 ggagwd gggagg 3.161 7.86e-04
876 ggagwd aggaga 3.736 9.35e-05
961 ugcygyy agcggcu 1.768 3.85e-02
964 ugcygyy ggcuucu 1.768 3.85e-02
972 ugcygyy ggccgcc 2.313 1.04e-02
975 ugcygyy cgccgcc 2.535 5.62e-03
998 ugcygyy agcuggc 1.929 2.69e-02
1201 ugcygyy uucucuc 1.929 2.69e-02
1205 ugcygyy cuccguc 1.818 3.45e-02
1220 ugcygyy cucugcu 1.929 2.69e-02
1223 ugcygyy ugcucuc 2.172 1.49e-02
1240 ugcygyy uccuccc 1.818 3.45e-02
1252 ugcygyy ggcagcc 1.818 3.45e-02
1262 ugcygyy agccccu 1.929 2.69e-02
1268 ugcygyy uggugcu 2.172 1.49e-02
1271 ugcygyy ugcucca 1.818 3.45e-02
1344 ugcygyy uguuguu 2.172 1.49e-02
1347 ugcygyy uguuucu 1.929 2.69e-02
1350 ugcygyy uucugug 1.929 2.69e-02
1368 ugcygyy ggcuccu 1.818 3.45e-02
1411 gryymcyr ggccacag 1.909 2.81e-02
1433 gryymcyr gcccacug 1.909 2.81e-02
1491 ugcygyy ucccucc 2.131 1.65e-02
1512 ugcygyy uccugcu 2.667 3.83e-03
1515 ugcygyy ugcugcc 2.586 4.85e-03
1607 ggagwd aggaga 1.954 2.54e-02
1621 ggagwd aggcga 2.471 6.74e-03
1640 ggagwd uggagc 2.103 1.77e-02
1651 ggagwd aggagg 2.322 1.01e-02
1781 ggagwd aggagc 2.241 1.25e-02
2271 ugcygyy ugcuuuu 2.172 1.49e-02
2284 ugcygyy ugauuuu 1.929 2.69e-02
2292 ugcygyy uucuauu 1.929 2.69e-02
2295 ugcygyy uauuguu 1.818 3.45e-02
Protein: SRSF3(Hs/Mm)
Sequence Position Motif K-mer Z-score P-value
26 cuckucy cccggcc 2.030 2.12e-02
30 cuckucy gccgucc 2.030 2.12e-02
41 cuckucy cuccccu 2.020 2.17e-02
43 cuckucy ccccucc 2.030 2.12e-02
44 cuckucy cccuccu 2.030 2.12e-02
46 cuckucy cuccugc 2.030 2.12e-02
67 cuckucy ggcuucu 1.950 2.56e-02
276 cuckucy uucgccu 2.020 2.17e-02
278 cuckucy cgccucu 2.020 2.17e-02
281 cuckucy cucuggc 2.020 2.17e-02
283 cuckucy cuggccc 2.020 2.17e-02
292 cuckucy cccuccc 2.020 2.17e-02
300 cuckucy cugaucc 2.020 2.17e-02
322 wcwwc gcaac 1.696 4.49e-02
326 cuckucy cccuugc 1.860 3.14e-02
333 cuckucy cgcaucc 1.840 3.29e-02
345 wcwwc acuuu 1.696 4.49e-02
346 cuckucy cuuugcc 1.850 3.22e-02
370 wcwwc acuuu 2.186 1.44e-02
383 wcwwc acuua 1.941 2.61e-02
387 wcwwc acaac 2.676 3.73e-03
390 wcwwc acacc 2.186 1.44e-02
405 cuckucy cgcgacu 2.360 9.14e-03
407 cuckucy cgacucu 1.800 3.59e-02
410 cuckucy cucuccc 2.980 1.44e-03
411 wcwwc ucucc 2.186 1.44e-02
414 cuckucy cccgacg 1.800 3.59e-02
429 cuckucy cuauucu 3.240 5.98e-04
430 wcwwc uauuc 1.941 2.61e-02
432 cuckucy uucugcc 2.580 4.94e-03
433 wcwwc ucugc 1.941 2.61e-02
437 cuckucy cccauuu 1.810 3.51e-02
449 cuckucy cacuucc 3.250 5.77e-04
450 wcwwc acuuc 2.431 7.53e-03
451 cuckucy cuucccc 1.940 2.62e-02
454 cuckucy ccccgcc 1.940 2.62e-02
455 cuckucy cccgccg 1.840 3.29e-02
457 cuckucy cgccgcu 1.840 3.29e-02
460 cuckucy cgcugcc 2.490 6.39e-03
466 cuckucy caggacc 1.930 2.68e-02
471 cuckucy cccgcuu 1.930 2.68e-02
473 cuckucy cgcuucu 3.250 5.77e-04
475 cuckucy cuucucu 2.490 6.39e-03
478 cuckucy cucugaa 1.820 3.44e-02
488 cuckucy cucuccu 2.930 1.69e-03
490 cuckucy cuccuug 1.770 3.84e-02
491 cuckucy uccuugc 1.770 3.84e-02
498 cuckucy agcugcu 1.770 3.84e-02
563 wcwwc ucaac 2.676 3.73e-03
572 wcwwc gcuuc 2.373 8.82e-03
575 wcwwc ucacc 2.647 4.06e-03
578 wcwwc ccaac 2.657 3.94e-03
587 wcwwc acuau 2.657 3.94e-03
593 wcwwc accuc 2.402 8.15e-03
595 cuckucy cucgacu 2.030 2.12e-02
596 wcwwc ucgac 2.412 7.93e-03
599 wcwwc acuac 3.392 3.47e-04
602 wcwwc acgac 2.657 3.94e-03
620 wcwwc auuuc 2.765 2.85e-03
622 cuckucy uucuacu 1.860 3.14e-02
623 wcwwc ucuac 3.745 9.02e-05
626 wcwwc acugc 2.735 3.12e-03
641 wcwwc agaac 2.676 3.73e-03
643 cuckucy aacuucu 1.820 3.44e-02
644 wcwwc acuuc 3.539 2.01e-04
646 cuckucy uucuacc 1.690 4.55e-02
647 wcwwc ucuac 3.412 3.22e-04
729 cuckucy cccgccc 1.860 3.14e-02
735 cuckucy ccugucc 2.310 1.04e-02
736 cuckucy cuguccc 2.310 1.04e-02
741 cuckucy cccuagc 1.840 3.29e-02
743 cuckucy cuagccg 1.840 3.29e-02
748 cuckucy cgccgcu 1.860 3.14e-02
750 cuckucy ccgcucc 1.860 3.14e-02
751 cuckucy cgcuccg 1.860 3.14e-02
755 cuckucy ccgggcu 1.850 3.22e-02
760 cuckucy cucugcu 3.090 1.00e-03
762 cuckucy cugcucg 1.820 3.44e-02
765 cuckucy cucgccc 3.250 5.77e-04
768 cuckucy gcccucc 1.950 2.56e-02
769 cuckucy cccuccu 2.660 3.91e-03
771 cuckucy cuccuac 2.660 3.91e-03
773 wcwwc ccuac 1.824 3.41e-02
786 cuckucy cacaccc 1.860 3.14e-02
787 wcwwc acacc 2.373 8.82e-03
790 cuckucy cccuucu 3.100 9.68e-04
791 wcwwc ccuuc 2.373 8.82e-03
792 cuckucy cuucucc 2.370 8.89e-03
793 cuckucy uucuccc 2.370 8.89e-03
794 wcwwc ucucc 2.373 8.82e-03
797 cuckucy cccuucg 2.220 1.32e-02
798 wcwwc ccuuc 2.373 8.82e-03
809 wcwwc acaac 2.892 1.91e-03
812 wcwwc acgac 2.412 7.93e-03
829 cuckucy agcuucu 1.780 3.75e-02
830 wcwwc gcuuc 2.186 1.44e-02
831 cuckucy cuucucc 1.780 3.75e-02
833 wcwwc ucucc 2.186 1.44e-02
837 cuckucy cacggcc 1.780 3.75e-02
881 wcwwc acaug 1.941 2.61e-02
887 wcwwc ugaac 1.941 2.61e-02
899 wcwwc ucauc 2.794 2.60e-03
902 wcwwc ucugc 2.618 4.42e-03
914 wcwwc acgac 2.843 2.23e-03
923 wcwwc ccuuc 2.882 1.98e-03
926 wcwwc ucauc 3.765 8.33e-05
929 wcwwc ucaaa 2.833 2.31e-03
932 wcwwc aaaac 2.833 2.31e-03
935 wcwwc acauc 3.745 9.02e-05
938 wcwwc ucauc 3.745 9.02e-05
940 cuckucy aucaucc 1.660 4.85e-02
941 wcwwc ucauc 3.745 9.02e-05
961 cuckucy agcggcu 2.170 1.50e-02
964 cuckucy ggcuucu 2.820 2.40e-03
966 cuckucy cuucucg 2.090 1.83e-02
969 cuckucy cucggcc 3.250 5.77e-04
975 cuckucy cgccgcc 2.130 1.66e-02
985 cuckucy cucgucu 3.780 7.84e-05
1000 cuckucy cuggccu 2.560 5.23e-03
1002 cuckucy ggccucc 1.910 2.81e-02
1003 cuckucy gccuccu 1.910 2.81e-02
1005 cuckucy cuccuac 2.530 5.70e-03
1006 cuckucy uccuacc 1.910 2.81e-02
1045 cuckucy cccgccc 2.000 2.27e-02
1051 cuckucy cgcggcc 2.030 2.12e-02
1058 wcwwc acagc 1.696 4.49e-02
1060 cuckucy agcgucu 2.040 2.07e-02
1063 cuckucy gucugcu 2.040 2.07e-02
1064 wcwwc ucugc 1.696 4.49e-02
1065 cuckucy cugcucc 2.040 2.07e-02
1068 cuckucy cuccacc 2.040 2.07e-02
1069 wcwwc uccac 1.696 4.49e-02
1071 cuckucy caccucc 2.030 2.12e-02
1072 wcwwc accuc 1.696 4.49e-02
1080 cuckucy cuuguac 2.020 2.17e-02
1082 wcwwc uguac 1.696 4.49e-02
1118 wcwwc gcauc 1.941 2.61e-02
1120 cuckucy aucgacc 2.310 1.04e-02
1121 wcwwc ucgac 1.941 2.61e-02
1132 cuckucy guggucu 2.310 1.04e-02
1135 cuckucy gucuucc 2.670 3.79e-03
1136 wcwwc ucuuc 3.353 4.00e-04
1140 cuckucy ccccuac 1.840 3.29e-02
1141 cuckucy cccuacc 2.530 5.70e-03
1142 wcwwc ccuac 2.618 4.42e-03
1143 cuckucy cuacccu 1.840 3.29e-02
1145 cuckucy acccucu 1.850 3.22e-02
1146 cuckucy cccucuc 1.840 3.29e-02
1148 cuckucy cucucaa 1.840 3.29e-02
1150 cuckucy cucaacg 1.840 3.29e-02
1151 wcwwc ucaac 3.167 7.70e-04
1154 wcwwc acgac 2.431 7.53e-03
1157 wcwwc acagc 2.431 7.53e-03
1164 cuckucy cucgccc 2.580 4.94e-03
1170 cuckucy caagucc 2.040 2.07e-02
1179 cuckucy cgccucg 1.660 4.85e-02
1182 cuckucy cucgcaa 1.670 4.75e-02
1186 cuckucy caagacu 1.670 4.75e-02
1195 cuckucy agcgccu 1.680 4.65e-02
1197 cuckucy cgccuuc 1.680 4.65e-02
1198 cuckucy gccuucu 2.390 8.42e-03
1199 wcwwc ccuuc 1.696 4.49e-02
1200 cuckucy cuucucu 2.570 5.08e-03
1201 cuckucy uucucuc 1.860 3.14e-02
1203 cuckucy cucuccg 2.580 4.94e-03
1204 wcwwc ucucc 1.882 2.99e-02
1205 cuckucy cuccguc 1.860 3.14e-02
1206 cuckucy uccgucc 2.580 4.94e-03
1207 cuckucy ccguccu 1.860 3.14e-02
1209 cuckucy guccucg 1.860 3.14e-02
1210 wcwwc uccuc 1.912 2.79e-02
1212 cuckucy cucggau 2.580 4.94e-03
1215 cuckucy ggauucu 1.860 3.14e-02
1217 cuckucy auucucu 1.860 3.14e-02
1220 cuckucy cucugcu 3.110 9.35e-04
1221 wcwwc ucugc 1.912 2.79e-02
1222 cuckucy cugcucu 2.580 4.94e-03
1225 cuckucy cucuccu 3.110 9.35e-04
1226 wcwwc ucucc 1.882 2.99e-02
1227 cuckucy cuccucg 2.580 4.94e-03
1228 wcwwc uccuc 1.882 2.99e-02
1230 cuckucy cucgacg 2.570 5.08e-03
1231 wcwwc ucgac 1.824 3.41e-02
1236 cuckucy ggagucc 1.860 3.14e-02
1239 cuckucy guccucc 2.560 5.23e-03
1240 cuckucy uccuccc 1.850 3.22e-02
1242 cuckucy cuccccg 1.860 3.14e-02
1398 cuckucy accuucu 1.670 4.75e-02
1399 wcwwc ccuuc 1.696 4.49e-02
1401 cuckucy uucugcu 1.860 3.14e-02
1402 wcwwc ucugc 1.824 3.41e-02
1415 wcwwc acagc 1.882 2.99e-02
1422 wcwwc accuc 1.912 2.79e-02
1424 cuckucy cuccuca 2.210 1.36e-02
1425 wcwwc uccuc 1.882 2.99e-02
1430 wcwwc acagc 1.824 3.41e-02
1436 cuckucy cacuggu 1.770 3.84e-02
1438 cuckucy cuggucc 2.930 1.69e-03
1441 cuckucy guccuca 1.770 3.84e-02
1442 wcwwc uccuc 2.412 7.93e-03
1445 wcwwc ucaag 2.422 7.72e-03
1456 cuckucy cacgucu 2.750 2.98e-03
1457 wcwwc acguc 2.784 2.68e-03
1458 cuckucy cgucucc 1.670 4.75e-02
1459 cuckucy gucucca 1.670 4.75e-02
1460 wcwwc ucucc 2.784 2.68e-03
1461 cuckucy cuccaca 1.680 4.65e-02
1462 wcwwc uccac 2.784 2.68e-03
1467 wcwwc acauc 3.637 1.38e-04
1470 wcwwc ucagc 2.784 2.68e-03
1475 wcwwc acaac 3.627 1.43e-04
1478 wcwwc acuac 3.627 1.43e-04
1487 cuckucy cgccucc 1.860 3.14e-02
1494 cuckucy cuccacu 1.860 3.14e-02
1495 wcwwc uccac 2.431 7.53e-03
1509 cuckucy cuauccu 1.860 3.14e-02
1559 wcwwc agauc 1.941 2.61e-02
1562 wcwwc ucagc 1.941 2.61e-02
1565 wcwwc gcaac 1.941 2.61e-02
1568 wcwwc acaac 2.431 7.53e-03
1616 wcwwc ucaag 2.314 1.03e-02
1631 wcwwc acaac 2.431 7.53e-03
1634 wcwwc acguc 1.941 2.61e-02
1637 wcwwc ucuug 1.941 2.61e-02
1736 wcwwc uuauc 1.941 2.61e-02
1760 wcwwc acauc 1.941 2.61e-02
1768 cuckucy uccgucc 1.780 3.75e-02
1792 cuckucy cucauuu 1.780 3.75e-02
1808 wcwwc acuug 1.696 4.49e-02
1821 wcwwc acgac 1.696 4.49e-02
1827 wcwwc agaac 1.882 2.99e-02
1841 wcwwc acaaa 1.912 2.79e-02
1845 wcwwc acuug 1.912 2.79e-02
1848 wcwwc ugaac 1.882 2.99e-02
1851 wcwwc acagc 1.882 2.99e-02
1854 wcwwc gcuac 1.824 3.41e-02
1863 cuckucy cucuugu 1.690 4.55e-02
1864 wcwwc ucuug 1.882 2.99e-02
1923 wcwwc ucacc 1.696 4.49e-02
1930 wcwwc ugaac 1.824 3.41e-02
1933 wcwwc acuug 1.882 2.99e-02
1940 wcwwc ucaaa 1.912 2.79e-02
1949 wcwwc ugauc 2.402 8.15e-03
1952 wcwwc ucaaa 2.402 8.15e-03
1958 wcwwc gcaac 2.402 8.15e-03
1961 wcwwc accuc 2.373 8.82e-03
1966 wcwwc acaac 2.794 2.60e-03
1981 wcwwc ucuug 1.941 2.61e-02
2019 wcwwc ucaaa 1.696 4.49e-02
2028 wcwwc acuuu 1.824 3.41e-02
2042 wcwwc agaac 1.824 3.41e-02
2045 wcwwc acuuu 1.696 4.49e-02
2046 cuckucy cuuuuuu 1.950 2.56e-02
2060 wcwwc ccauc 1.882 2.99e-02
2062 cuckucy aucuuuu 1.950 2.56e-02
2063 wcwwc ucuuu 1.882 2.99e-02
2064 cuckucy cuuuuuu 1.950 2.56e-02
2070 cuckucy uuuuucu 1.950 2.56e-02
2071 wcwwc uuuuc 1.696 4.49e-02
2074 wcwwc ucuuu 1.696 4.49e-02
2077 wcwwc uuaac 1.696 4.49e-02
2216 wcwwc aguac 1.696 4.49e-02
2289 cuckucy uuuuucu 1.680 4.65e-02
2294 cuckucy cuauugu 1.680 4.65e-02
Protein: SRSF5(Hs/Mm)
Sequence Position Motif K-mer Z-score P-value
34 yywcwsg ucccugg 1.914 2.78e-02
69 yywcwsg cuucuca 2.484 6.50e-03
71 yywcwsg ucucaga 2.462 6.91e-03
73 yywcwsg ucagagg 2.398 8.24e-03
132 yywcwsg uuucggg 2.269 1.16e-02
147 yywcwsg uaacucg 2.312 1.04e-02
280 yywcwsg ccucugg 2.613 4.49e-03
293 yywcwsg ccucccg 2.591 4.78e-03
375 yywcwsg gcacugg 1.828 3.38e-02
411 yywcwsg ucucccg 1.925 2.71e-02
475 yywcwsg cuucucu 2.323 1.01e-02
477 yywcwsg ucucuga 2.312 1.04e-02
504 yywcwsg uuagacg 2.516 5.93e-03
518 yywcwsg uuuuucg 2.462 6.91e-03
520 yywcwsg uuucggg 2.559 5.25e-03
544 yywcwsg ccucccg 2.301 1.07e-02
573 yywcwsg cuucacc 2.086 1.85e-02
579 yywcwsg caacagg 2.398 8.24e-03
603 yywcwsg cgacucg 2.043 2.05e-02
624 yywcwsg cuacugc 2.086 1.85e-02
762 yywcwsg cugcucg 2.312 1.04e-02
785 yywcwsg ucacacc 2.581 4.93e-03
792 yywcwsg cuucucc 2.462 6.91e-03
799 yywcwsg cuucggg 2.398 8.24e-03
831 yywcwsg cuucucc 1.849 3.22e-02
834 yywcwsg cuccacg 1.849 3.22e-02
966 yywcwsg cuucucg 3.032 1.21e-03
989 yywcwsg ucucaga 2.656 3.95e-03
1056 yywcwsg ccacagc 1.882 2.99e-02
1087 yywcwsg cugcagg 2.312 1.04e-02
1109 yywcwsg ccucaga 2.462 6.91e-03
1125 yywcwsg ccccucg 2.516 5.93e-03
1147 yywcwsg ccucuca 2.323 1.01e-02
1200 yywcwsg cuucucu 2.516 5.93e-03
1202 yywcwsg ucucucc 2.613 4.49e-03
1219 yywcwsg ucucugc 2.613 4.49e-03
1227 yywcwsg cuccucg 2.613 4.49e-03
1246 yywcwsg ccgcagg 2.484 6.50e-03
1264 yywcwsg ccccugg 2.204 1.38e-02
1370 yywcwsg cuccugg 2.398 8.24e-03
1400 yywcwsg cuucugc 2.484 6.50e-03
1403 yywcwsg cugcugg 2.645 4.08e-03
1413 yywcwsg ccacagc 3.054 1.13e-03
1426 yywcwsg ccucaca 3.054 1.13e-03
1428 yywcwsg ucacagc 3.065 1.09e-03
1435 yywcwsg ccacugg 3.419 3.14e-04
1443 yywcwsg ccucaag 3.043 1.17e-03
1463 yywcwsg ccacaca 2.301 1.07e-02
1496 yywcwsg ccacucg 2.656 3.95e-03
1962 yywcwsg ccucaca 1.828 3.38e-02
2122 yywcwsg uuacaca 2.280 1.13e-02
2132 yywcwsg uuucucu 2.398 8.24e-03
2134 yywcwsg ucucugu 2.398 8.24e-03
2189 yywcwsg uuacaca 1.882 2.99e-02
2318 yywcwsg uaacugg 1.828 3.38e-02
Protein: SRSF6(Hs/Mm)
Sequence Position Motif K-mer Z-score P-value
1466 yrcrkm cacauc 2.596 4.72e-03
Protein: SRSF7(Hs/Mm)
Sequence Position Motif K-mer Z-score P-value
386 acgacg uacaac 2.282 1.12e-02
400 acgacg aaggac 2.936 1.66e-03
405 acgacg cgcgac 3.090 1.00e-03
414 acgacg cccgac 2.577 4.98e-03
530 wggacra uggaaaa 1.957 2.52e-02
552 acgacg gacgau 1.692 4.53e-02
589 acgacg uaugac 3.295 4.92e-04
595 acgacg cucgac 3.551 1.92e-04
598 acgacg gacuac 3.667 1.23e-04
601 acgacg uacgac 3.962 3.72e-05
631 acgacg gacgag 1.692 4.53e-02
635 wggacra aggagga 2.819 2.41e-03
638 wggacra aggagaa 2.819 2.41e-03
808 acgacg gacaac 3.705 1.06e-04
811 acgacg aacgac 4.038 2.70e-05
814 acgacg gacggc 3.987 3.35e-05
824 acgagagay gcgggagcu 2.375 8.77e-03
837 acgacg cacggc 3.077 1.05e-03
838 acgagagay acggccgac 1.850 3.22e-02
841 acgacg gccgac 2.782 2.70e-03
849 acgagagay gcuggagau 1.850 3.22e-02
876 acgagagay aggagacau 1.850 3.22e-02
890 acgagagay accagaguu 1.850 3.22e-02
904 acgacg ugcgac 3.256 5.65e-04
911 wggacra cggacga 2.340 9.64e-03
913 acgacg gacgac 3.897 4.87e-05
916 acgacg gacgag 3.372 3.73e-04
1120 acgacg aucgac 2.269 1.16e-02
1293 acgacg caccac 2.705 3.42e-03
1300 acgagagay agcagcgac 2.200 1.39e-02
1303 acgacg agcgac 2.897 1.88e-03
1313 wggacra aggagga 3.234 6.10e-04
1331 wggacra aggaaga 3.447 2.83e-04
1355 wggacra uggaaaa 2.340 9.64e-03
1456 acgacg cacguc 2.641 4.13e-03
1474 acgacg cacaac 2.167 1.51e-02
1477 acgacg aacuac 2.205 1.37e-02
1607 wggacra aggagaa 2.436 7.43e-03
1630 acgacg cacaac 2.090 1.83e-02
1633 acgacg aacguc 2.718 3.28e-03
1706 wggacra uggaaaa 1.957 2.52e-02
1804 acgacg gaggac 3.231 6.17e-04
1820 acgacg aacgac 3.564 1.83e-04
1821 wggacra acgacga 2.798 2.57e-03
1823 acgacg gacgag 3.231 6.17e-04
1875 wggacra aggaaaa 2.340 9.64e-03
1885 wggacra aggaaaa 2.340 9.64e-03
Protein: SRSF9(Hs/Mm)
Sequence Position Motif K-mer Z-score P-value
98 kgrwgsm ggaggga 2.986 1.41e-03
101 kgrwgsm gggaggg 2.775 2.76e-03
102 kgrwgsm ggaggga 2.986 1.41e-03
635 akgavmr aggagga 3.831 6.38e-05
638 akgavmr aggagaa 3.985 3.37e-05
653 akgavmr agcagca 3.662 1.25e-04
656 akgavmr agcagca 3.662 1.25e-04
659 akgavmr agcagca 3.538 2.02e-04
1280 akgavmr aggagac 1.985 2.36e-02
1313 akgavmr aggagga 3.646 1.33e-04
1316 akgavmr aggaaca 3.831 6.38e-05
1331 akgavmr aggaaga 3.138 8.51e-04
1332 kgrwgsm ggaagaa 2.254 1.21e-02
1651 akgavmr aggagga 3.031 1.22e-03
1654 akgavmr aggaacg 2.985 1.42e-03
1781 akgavmr aggagca 1.938 2.63e-02
Protein: TARDBP(Hs/Mm)
Sequence Position Motif K-mer Z-score P-value
952 ugugug uguaug 2.550 5.39e-03
954 ugugug uaugug 2.550 5.39e-03
956 ugugug ugugga 1.972 2.43e-02
1347 ugugug uguuuc 1.908 2.82e-02
1349 ugugug uuucug 1.908 2.82e-02
1351 ugugug ucugug 2.294 1.09e-02
1353 ugugug ugugga 1.908 2.82e-02
1685 ugugug ugcgug 1.991 2.32e-02
1865 ugugug cuugug 1.679 4.66e-02
1867 ugugug ugugcg 2.064 1.95e-02
1869 ugugug ugcgua 1.679 4.66e-02
Protein: TIA1(Hs/Mm)
Sequence Position Motif K-mer Z-score P-value
130 uuuuubk guuuucg 1.784 3.72e-02
131 uuuuubk uuuucgg 1.686 4.59e-02
515 uuuuubk auuuuuu 3.108 9.42e-04
516 uuuuubk uuuuuuu 3.431 3.01e-04
517 uuuuubk uuuuuuc 3.353 4.00e-04
518 uuuuubk uuuuucg 3.412 3.22e-04
519 uuuuubk uuuucgg 2.824 2.37e-03
1346 uuuuubk uuguuuc 1.765 3.88e-02
1674 uuuuubk cuuuuuu 2.422 7.72e-03
1675 uuuuubk uuuuuug 2.775 2.76e-03
1676 uuuuubk uuuuugc 2.480 6.57e-03
2046 uuuuubk cuuuuuu 3.343 4.14e-04
2047 uuuuubk uuuuuua 3.676 1.18e-04
2048 uuuuubk uuuuuau 3.412 3.22e-04
2049 uuuuubk uuuuaug 3.363 3.85e-04
2063 uuuuubk ucuuuuu 3.147 8.25e-04
2064 uuuuubk cuuuuuu 3.343 4.14e-04
2065 uuuuubk uuuuuuu 3.794 7.41e-05
2066 uuuuubk uuuuuuu 3.794 7.41e-05
2067 uuuuubk uuuuuuu 3.794 7.41e-05
2068 uuuuubk uuuuuuu 3.794 7.41e-05
2069 uuuuubk uuuuuuc 3.676 1.18e-04
2070 uuuuubk uuuuucu 3.549 1.93e-04
2071 uuuuubk uuuucuu 3.147 8.25e-04
2072 uuuuubk uuucuuu 3.147 8.25e-04
2073 uuuuubk uucuuua 3.020 1.26e-03
2099 uuuuubk uuguuuu 2.471 6.74e-03
2100 uuuuubk uguuuuu 2.471 6.74e-03
2101 uuuuubk guuuuua 2.520 5.87e-03
2102 uuuuubk uuuuuaa 2.559 5.25e-03
2248 uuuuubk auuuuuu 3.333 4.30e-04
2249 uuuuubk uuuuuuu 3.676 1.18e-04
2250 uuuuubk uuuuuuu 3.676 1.18e-04
2251 uuuuubk uuuuuua 3.578 1.73e-04
2252 uuuuubk uuuuuau 3.353 4.00e-04
2253 uuuuubk uuuuauu 3.088 1.01e-03
2254 uuuuubk uuuauuu 3.088 1.01e-03
2255 uuuuubk uuauuua 2.961 1.53e-03
2267 uuuuubk auuuugc 3.010 1.31e-03
2273 uuuuubk cuuuuua 3.206 6.73e-04
2274 uuuuubk uuuuuaa 3.275 5.28e-04
2286 uuuuubk auuuuuu 3.314 4.60e-04
2287 uuuuubk uuuuuuu 3.618 1.48e-04
2288 uuuuubk uuuuuuc 3.559 1.86e-04
2289 uuuuubk uuuuucu 3.451 2.79e-04
2290 uuuuubk uuuucua 2.931 1.69e-03
2297 uuuuubk uuguuuu 3.059 1.11e-03
2298 uuuuubk uguuuuu 3.059 1.11e-03
2299 uuuuubk guuuuua 3.118 9.10e-04
2300 uuuuubk uuuuuag 3.500 2.33e-04
Protein: TRA2A(Hs/Mm)
Sequence Position Motif K-mer Z-score P-value
175 gaagaggaag gcagagggag 1.739 4.10e-02
631 gaagaggaag gacgaggagg 1.739 4.10e-02
1312 gaagaggaag gaggaggaac 4.326 7.59e-06
1315 gaagaggaag gaggaacaag 3.815 6.81e-05
1318 gaagaggaag gaacaagaag 4.326 7.59e-06
1321 gaagaggaag caagaagaug 3.815 6.81e-05
1324 gaagaggaag gaagaugagg 4.326 7.59e-06
1327 gaagaggaag gaugaggaag 4.598 2.13e-06
1330 gaagaggaag gaggaagaaa 3.815 6.81e-05
1650 gaagaggaag gaggaggaac 1.739 4.10e-02
1777 gaagaggaag gcagaggagc 2.424 7.68e-03
1780 gaagaggaag gaggagcaaa 2.424 7.68e-03
1801 gaagaggaag gaagaggacu 2.685 3.63e-03
Protein: TRA2B(Hs/Mm)
Sequence Position Motif K-mer Z-score P-value
1315 gaagaa gaggaa 3.277 5.25e-04
1318 gaagaa gaacaa 3.277 5.25e-04
1321 gaagaa caagaa 3.277 5.25e-04
1324 gaagaa gaagau 3.277 5.25e-04
1330 gaagaa gaggaa 3.277 5.25e-04
1333 gaagaa gaagaa 3.652 1.30e-04
1539 aaguguu caguguc 1.821 3.43e-02
1808 aaguguu acuuguu 2.105 1.76e-02
1829 aaguguu aacaguu 1.916 2.77e-02
1908 aaguguu aaauguc 2.200 1.39e-02
1933 aaguguu acuuguu 2.200 1.39e-02
1978 aaguguu gagucuu 1.916 2.77e-02
1993 aaguguu aagauuu 2.105 1.76e-02
2044 aaguguu aacuuuu 1.726 4.22e-02
2079 aaguguu aacagau 2.074 1.90e-02
2081 aaguguu cagauuu 2.074 1.90e-02
2084 aaguguu auuugua 2.095 1.81e-02
2086 aaguguu uuguauu 2.200 1.39e-02
2094 aaguguu aagaauu 2.947 1.60e-03
2097 aaguguu aauuguu 3.326 4.41e-04
2099 aaguguu uuguuuu 2.242 1.25e-02
2108 aaguguu aaaaauu 2.263 1.18e-02
2109 aaguguu aaaauuu 2.263 1.18e-02
2110 aaguguu aaauuuu 2.989 1.40e-03
2111 aaguguu aauuuua 2.263 1.18e-02
2117 aaguguu aagauuu 3.021 1.26e-03
2127 aaguguu caauguu 2.558 5.26e-03
2128 aaguguu aauguuu 1.853 3.19e-02
2129 aaguguu auguuuc 1.884 2.98e-02
2141 aaguguu aaauauu 2.526 5.77e-03
2154 aaguguu aaaugua 2.432 7.51e-03
2164 aaguguu aacuuua 1.768 3.85e-02
2174 aaguguu aaacguu 2.242 1.25e-02
2175 aaguguu aacguuu 1.684 4.61e-02
2176 aaguguu acguuua 1.684 4.61e-02
2222 aaguguu uaguauu 2.105 1.76e-02
2246 aaguguu uaauuuu 1.684 4.61e-02
2247 aaguguu aauuuuu 2.242 1.25e-02
2295 aaguguu uauuguu 1.895 2.90e-02
Protein: TUT1(Hs/Mm)
Sequence Position Motif K-mer Z-score P-value
2212 mrauacu auauagu 2.115 1.72e-02
Protein: U2AF2(Hs/Mm)
Sequence Position Motif K-mer Z-score P-value
515 uuuuuyc auuuuuu 2.905 1.84e-03
516 uuuuuyc uuuuuuu 3.190 7.11e-04
517 uuuuuyc uuuuuuc 3.371 3.74e-04
518 uuuuuyc uuuuucg 2.952 1.58e-03
1674 uuuuuyc cuuuuuu 2.638 4.17e-03
1675 uuuuuyc uuuuuug 2.857 2.14e-03
1676 uuuuuyc uuuuugc 2.857 2.14e-03
1677 uuuuuyc uuuugcc 2.562 5.20e-03
2046 uuuuuyc cuuuuuu 3.390 3.49e-04
2047 uuuuuyc uuuuuua 3.676 1.18e-04
2048 uuuuuyc uuuuuau 3.314 4.60e-04
2063 uuuuuyc ucuuuuu 3.095 9.84e-04
2064 uuuuuyc cuuuuuu 3.390 3.49e-04
2065 uuuuuyc uuuuuuu 3.752 8.77e-05
2066 uuuuuyc uuuuuuu 3.752 8.77e-05
2067 uuuuuyc uuuuuuu 3.752 8.77e-05
2068 uuuuuyc uuuuuuu 3.752 8.77e-05
2069 uuuuuyc uuuuuuc 3.943 4.02e-05
2070 uuuuuyc uuuuucu 3.533 2.05e-04
2071 uuuuuyc uuuucuu 3.219 6.43e-04
2072 uuuuuyc uuucuuu 3.095 9.84e-04
2099 uuuuuyc uuguuuu 1.990 2.33e-02
2100 uuuuuyc uguuuuu 1.990 2.33e-02
2101 uuuuuyc guuuuua 2.105 1.76e-02
2102 uuuuuyc uuuuuaa 2.095 1.81e-02
2248 uuuuuyc auuuuuu 3.143 8.36e-04
2249 uuuuuyc uuuuuuu 3.457 2.73e-04
2250 uuuuuyc uuuuuuu 3.457 2.73e-04
2251 uuuuuyc uuuuuua 3.390 3.49e-04
2252 uuuuuyc uuuuuau 3.076 1.05e-03
2253 uuuuuyc uuuuauu 2.914 1.78e-03
2254 uuuuuyc uuuauuu 2.857 2.14e-03
2267 uuuuuyc auuuugc 3.305 4.75e-04
2273 uuuuuyc cuuuuua 3.295 4.92e-04
2274 uuuuuyc uuuuuaa 3.229 6.21e-04
2286 uuuuuyc auuuuuu 3.305 4.75e-04
2287 uuuuuyc uuuuuuu 3.610 1.53e-04
2288 uuuuuyc uuuuuuc 3.790 7.53e-05
2289 uuuuuyc uuuuucu 3.438 2.93e-04
2290 uuuuuyc uuuucua 3.067 1.08e-03
2297 uuuuuyc uuguuuu 3.019 1.27e-03
2298 uuuuuyc uguuuuu 3.019 1.27e-03
2299 uuuuuyc guuuuua 3.162 7.83e-04
2300 uuuuuyc uuuuuag 3.143 8.36e-04
Protein: YBX1(Hs/Mm)
Sequence Position Motif K-mer Z-score P-value
576 caaccacaa caccaacag 1.954 2.54e-02
577 aacaucd accaaca 2.610 4.53e-03
579 caaccacaa caacaggaa 1.954 2.54e-02
597 caaccacaa cgacuacga 1.954 2.54e-02
643 aacaucd aacuucu 3.117 9.14e-04
650 aacaucd accagca 3.130 8.74e-04
653 aacaucd agcagca 2.987 1.41e-03
656 aacaucd agcagca 2.987 1.41e-03
659 aacaucd agcagca 2.987 1.41e-03
922 aacaucd accuuca 3.922 4.39e-05
925 aacaucd uucauca 3.805 7.09e-05
927 caaccacaa caucaaaaa 1.954 2.54e-02
930 caaccacaa caaaaacau 1.954 2.54e-02
934 aacaucd aacauca 4.818 7.25e-07
937 aacaucd aucauca 4.468 3.95e-06
940 aacaucd aucaucc 4.130 1.81e-05
942 caaccacaa cauccagga 1.954 2.54e-02
1035 caaccacaa cagcccgaa 1.954 2.54e-02
1053 caaccacaa cggccacag 1.954 2.54e-02
1156 aacaucd gacagca 2.234 1.27e-02
1289 caaccacaa cgcccacca 2.276 1.14e-02
1292 caaccacaa ccaccacca 2.598 4.69e-03
1294 aacaucd accacca 3.221 6.39e-04
1295 caaccacaa ccaccagca 2.759 2.90e-03
1297 aacaucd accagca 3.143 8.36e-04
1414 aacaucd cacagca 2.416 7.85e-03
1421 aacaucd aaccucc 2.000 2.27e-02
1466 aacaucd cacauca 1.662 4.83e-02
1561 aacaucd aucagca 2.909 1.81e-03
1563 caaccacaa cagcaacaa 3.391 3.48e-04
1564 aacaucd agcaaca 2.909 1.81e-03
1566 caaccacaa caacaaccg 2.920 1.75e-03
1567 aacaucd aacaacc 3.026 1.24e-03
1569 caaccacaa caaccgaaa 3.391 3.48e-04
1584 caaccacaa cagccccag 2.920 1.75e-03
1819 caaccacaa aaacgacga 2.276 1.14e-02
1822 caaccacaa cgacgagaa 2.276 1.14e-02
1836 caaccacaa gaaacacaa 2.598 4.69e-03
1838 aacaucd aacacaa 2.117 1.71e-02
1850 aacaucd aacagcu 2.299 1.08e-02
Protein: YBX2(Hs/Mm)
Sequence Position Motif K-mer Z-score P-value
536 aacawcd accagca 1.770 3.84e-02
643 aacawcd aacuucu 2.838 2.27e-03
650 aacawcd accagca 2.716 3.30e-03
653 aacawcd agcagca 2.797 2.58e-03
656 aacawcd agcagca 2.797 2.58e-03
659 aacawcd agcagca 2.797 2.58e-03
931 aacawcd aaaaaca 3.378 3.65e-04
934 aacawcd aacauca 3.743 9.09e-05
937 aacawcd aucauca 3.297 4.89e-04
940 aacawcd aucaucc 3.108 9.42e-04
1153 aacawcd aacgaca 2.203 1.38e-02
1156 aacawcd gacagca 2.095 1.81e-02
1159 aacawcd agcagcu 2.068 1.93e-02
1297 aacawcd accagca 2.743 3.04e-03
1300 aacawcd agcagcg 2.770 2.80e-03
1319 aacawcd aacaaga 2.649 4.04e-03
1414 aacawcd cacagca 2.284 1.12e-02
1421 aacawcd aaccucc 1.770 3.84e-02
1466 aacawcd cacauca 2.865 2.09e-03
1469 aacawcd aucagca 2.622 4.37e-03
1474 aacawcd cacaacu 2.905 1.84e-03
1477 aacawcd aacuacg 2.838 2.27e-03
1561 aacawcd aucagca 2.946 1.61e-03
1564 aacawcd agcaaca 3.297 4.89e-04
1567 aacawcd aacaacc 3.568 1.80e-04
1752 aacawcd cacagca 1.824 3.41e-02
1759 aacawcd uacaucc 1.865 3.11e-02
1820 aacawcd aacgacg 1.986 2.35e-02
1850 aacawcd aacagcu 2.554 5.32e-03
2059 aacawcd accaucu 2.284 1.12e-02
Protein: ZC3H10(Hs/Mm)
Sequence Position Motif K-mer Z-score P-value
165 ssagcgm ccagcga 3.384 3.57e-04
181 ssagcgm ggagcga 3.342 4.16e-04
185 ssagcgm cgagcgg 3.315 4.58e-04
[truncated: 83 more rows]

## Sheet: myc-205
Predictions for sequence: sequence1
Calculation parameters:
Genome: Human (hg38)
Selected motifs: All Human/Mouse motifs
Stringency level: Medium
Conservation filter: Off
======================================================================================================================
Protein: A1CF(Hs/Mm)
Sequence Position Motif K-mer Z-score P-value
1949 wuaauur guauuua 1.911 2.80e-02
1956 wuaauur agaauug 2.100 1.79e-02
1970 wuaauur aaaauuu 1.933 2.66e-02
2000 wuaauur guaaaua 2.344 9.54e-03
2013 wuaauur uuaaaug 2.844 2.23e-03
2019 wuaauur guaaaua 2.611 4.51e-03
2023 wuaauur auaacuu 2.633 4.23e-03
2029 wuaauur uuaauaa 2.567 5.13e-03
2106 wuaauur cuaauuu 2.889 1.93e-03
2115 wuaauur uuuauuu 2.544 5.48e-03
2116 wuaauur uuauuua 2.733 3.14e-03
2120 wuaauur uuaagua 2.944 1.62e-03
Protein: ANKHD1(Hs/Mm)
Sequence Position Motif K-mer Z-score P-value
475 agacgww agccgua 1.652 4.93e-02
773 agacgww ggacgac 2.478 6.61e-03
776 agacgww cgacgag 2.507 6.09e-03
781 agacgww agaccuu 2.725 3.22e-03
1184 agacgww agaagau 2.087 1.84e-02
1683 agacgww cgacgag 2.043 2.05e-02
Protein: BRUNOL4(Hs/Mm)
Sequence Position Motif K-mer Z-score P-value
1208 kgugukk uguuucu 2.297 1.08e-02
1212 kgugukk ucugugg 2.365 9.02e-03
1946 kgugukk uuuguau 2.811 2.47e-03
1948 kgugukk uguauuu 2.905 1.84e-03
1961 kgugukk uguuuuu 2.568 5.11e-03
Protein: BRUNOL5(Hs/Mm)
Sequence Position Motif K-mer Z-score P-value
1208 ugugukk uguuucu 1.950 2.56e-02
1212 ugugukk ucugugg 1.938 2.63e-02
1946 ugugukk uuuguau 1.925 2.71e-02
1948 ugugukk uguauuu 2.100 1.79e-02
1961 ugugukk uguuuuu 2.188 1.43e-02
Protein: BRUNOL6(Hs/Mm)
Sequence Position Motif K-mer Z-score P-value
1212 ugugdkg ucugugg 1.800 3.59e-02
Protein: CNOT4(Hs/Mm)
Sequence Position Motif K-mer Z-score P-value
1398 gacaga gacagu 3.435 2.96e-04
1404 gacaga gucaga 3.435 2.96e-04
1417 gacaga gacaga 3.880 5.22e-05
1487 gacaga aacaca 2.565 5.16e-03
1489 gacaga cacaca 2.228 1.29e-02
1507 gacaga gccaga 2.337 9.72e-03
1699 gacaga aacaca 1.870 3.07e-02
1701 gacaga cacaaa 1.848 3.23e-02
2053 gacaga cacaga 1.696 4.49e-02
Protein: CPEB2(Hs/Mm)
Sequence Position Motif K-mer Z-score P-value
378 chuuuuu gauuuuu 2.673 3.76e-03
379 chuuuuu auuuuuu 2.796 2.59e-03
380 chuuuuu uuuuuuu 2.837 2.28e-03
381 chuuuuu uuuuuuc 2.439 7.36e-03
1534 chuuuuu gcuuuuu 2.398 8.24e-03
1535 chuuuuu cuuuuuu 2.776 2.75e-03
1536 chuuuuu uuuuuug 2.337 9.72e-03
1655 chuuuuu cauuucu 1.673 4.72e-02
1906 chuuuuu acuuuuu 3.531 2.07e-04
1907 chuuuuu cuuuuuu 4.163 1.57e-05
1908 chuuuuu uuuuuua 3.306 4.73e-04
1922 chuuuuu caucuuu 3.429 3.03e-04
1923 chuuuuu aucuuuu 3.224 6.32e-04
1924 chuuuuu ucuuuuu 3.602 1.58e-04
1925 chuuuuu cuuuuuu 4.163 1.57e-05
1926 chuuuuu uuuuuuu 3.806 7.06e-05
1927 chuuuuu uuuuuuu 3.806 7.06e-05
1928 chuuuuu uuuuuuu 3.806 7.06e-05
1929 chuuuuu uuuuuuu 3.806 7.06e-05
1930 chuuuuu uuuuuuc 3.306 4.73e-04
1960 chuuuuu uuguuuu 2.194 1.41e-02
1961 chuuuuu uguuuuu 2.296 1.08e-02
1962 chuuuuu guuuuua 2.184 1.45e-02
2108 chuuuuu aauuuuu 3.173 7.54e-04
2109 chuuuuu auuuuuu 3.347 4.08e-04
2110 chuuuuu uuuuuuu 3.418 3.15e-04
2111 chuuuuu uuuuuuu 3.418 3.15e-04
2112 chuuuuu uuuuuua 2.929 1.70e-03
Protein: CPEB4(Hs/Mm)
Sequence Position Motif K-mer Z-score P-value
378 uuuuuu gauuuu 2.713 3.33e-03
379 uuuuuu auuuuu 3.165 7.75e-04
380 uuuuuu uuuuuu 3.183 7.29e-04
381 uuuuuu uuuuuu 3.183 7.29e-04
382 uuuuuu uuuuuc 2.617 4.44e-03
1534 uuuuuu gcuuuu 2.548 5.42e-03
1535 uuuuuu cuuuuu 3.043 1.17e-03
1536 uuuuuu uuuuuu 2.957 1.55e-03
1537 uuuuuu uuuuug 2.513 5.99e-03
1906 uuuuuu acuuuu 3.104 9.55e-04
1907 uuuuuu cuuuuu 3.783 7.75e-05
1908 uuuuuu uuuuuu 3.652 1.30e-04
1909 uuuuuu uuuuua 3.009 1.31e-03
1924 uuuuuu ucuuuu 3.130 8.74e-04
1925 uuuuuu cuuuuu 3.783 7.75e-05
1926 uuuuuu uuuuuu 3.652 1.30e-04
1927 uuuuuu uuuuuu 3.652 1.30e-04
1928 uuuuuu uuuuuu 3.652 1.30e-04
1929 uuuuuu uuuuuu 3.652 1.30e-04
1930 uuuuuu uuuuuu 3.652 1.30e-04
1931 uuuuuu uuuuuc 3.009 1.31e-03
1961 uuuuuu uguuuu 2.609 4.54e-03
1962 uuuuuu guuuuu 2.896 1.89e-03
1963 uuuuuu uuuuua 2.557 5.28e-03
1972 uuuuuu aauuuu 2.643 4.11e-03
1973 uuuuuu auuuua 2.530 5.70e-03
2108 uuuuuu aauuuu 2.948 1.60e-03
2109 uuuuuu auuuuu 3.548 1.94e-04
2110 uuuuuu uuuuuu 3.583 1.70e-04
2111 uuuuuu uuuuuu 3.583 1.70e-04
2112 uuuuuu uuuuuu 3.583 1.70e-04
2113 uuuuuu uuuuua 2.948 1.60e-03
Protein: CUG-BP(Hs/Mm)
Sequence Position Motif K-mer Z-score P-value
90 ugcug agcug 2.133 1.65e-02
95 ugcug cgcug 2.115 1.72e-02
98 ugcug ugcgg 2.133 1.65e-02
106 ugcug uccug 2.115 1.72e-02
359 ugcug ugcag 2.142 1.61e-02
362 ugcug agcug 2.150 1.58e-02
365 ugcug ugcuu 2.142 1.61e-02
373 ugcug cgcug 2.133 1.65e-02
472 ugcug ugcag 1.743 4.07e-02
486 ugcug uacug 1.779 3.76e-02
532 ugcug agcug 1.779 3.76e-02
535 ugcug ugcag 1.743 4.07e-02
577 ugcug agcug 2.097 1.80e-02
580 ugcug ugcug 2.540 5.54e-03
624 ugcug ugcuc 1.814 3.48e-02
641 ugcug ugcgg 1.805 3.55e-02
709 ugcug agcug 2.593 4.76e-03
712 ugcug uggag 1.761 3.91e-02
715 ugcug agaug 1.761 3.91e-02
718 ugcug uggug 2.575 5.01e-03
727 ugcug agcug 2.611 4.51e-03
730 ugcug ugcug 3.053 1.13e-03
745 ugcug uggug 2.319 1.02e-02
859 ugcug agcug 1.743 4.07e-02
875 ugcug ggcug 1.743 4.07e-02
927 ugcug ugcuc 1.779 3.76e-02
949 ugcug ugcag 1.814 3.48e-02
1129 ugcug uggug 1.743 4.07e-02
1132 ugcug ugcuc 1.743 4.07e-02
1205 ugcug uguug 1.814 3.48e-02
1211 ugcug uucug 2.035 2.09e-02
1232 ugcug uccug 1.779 3.76e-02
1250 ugcug gucug 1.673 4.72e-02
1262 ugcug uucug 2.097 1.80e-02
1265 ugcug ugcug 2.540 5.54e-03
1373 ugcug uccug 1.929 2.69e-02
1376 ugcug ugcug 2.372 8.85e-03
1658 ugcug uucug 1.965 2.47e-02
1672 ugcug uguug 1.965 2.47e-02
1675 ugcug ugcgg 1.965 2.47e-02
Protein: DAZAP1(Hs/Mm)
Sequence Position Motif K-mer Z-score P-value
109 uagkwwr ugggaag 1.910 2.81e-02
132 uagkwwr uaggggg 2.045 2.04e-02
1590 uagkwwr aagguag 2.507 6.09e-03
2072 uagkwwr uauauag 2.806 2.51e-03
2091 uagkwwr uagguac 3.299 4.85e-04
Protein: ENOX1(Hs/Mm)
Sequence Position Motif K-mer Z-score P-value
1396 hrkacag uggacag 1.844 3.26e-02
1415 hrkacag gagacag 2.000 2.27e-02
1688 hrkacag agaacag 1.891 2.93e-02
Protein: ESRP2(Hs/Mm)
Sequence Position Motif K-mer Z-score P-value
109 ugggrad ugggaag 2.237 1.26e-02
307 ugggrad uggggac 1.882 2.99e-02
712 ugggrad uggagau 2.158 1.55e-02
733 ugggrad ugggagg 2.513 5.99e-03
1190 ugggrad ugaggaa 1.934 2.66e-02
Protein: FMR1(Hs/Mm)
Sequence Position Motif K-mer Z-score P-value
310 kgacarg ggacacu 2.014 2.20e-02
332 kgacarg ggacccg 2.514 5.97e-03
1379 kgacarg ugccaag 2.708 3.38e-03
1388 kgacarg ggucaag 2.986 1.41e-03
1397 kgacarg ggacagu 3.083 1.02e-03
1667 kgacarg ggacuug 2.097 1.80e-02
1683 kgacarg cgacgag 2.181 1.46e-02
Protein: FUS(Hs/Mm)
Sequence Position Motif K-mer Z-score P-value
160 cgcgc cccgc 2.289 1.10e-02
183 cgcgc uccgc 2.386 8.52e-03
319 cgcgc cccgc 2.024 2.15e-02
322 cgcgc gccgc 2.024 2.15e-02
335 cgcgc cccgc 2.024 2.15e-02
590 cgcgc cccgc 2.024 2.15e-02
607 cgcgc gccgc 2.506 6.11e-03
610 cgcgc gccgc 2.506 6.11e-03
626 cgcgc cucgc 2.036 2.09e-02
878 cgcgc ugcgc 2.120 1.70e-02
880 cgcgc cgcgc 1.952 2.55e-02
960 cgcgc agcgc 2.506 6.11e-03
963 cgcgc gccgc 2.265 1.18e-02
966 cgcgc gccgc 2.265 1.18e-02
1025 cgcgc cucgc 2.446 7.22e-03
1038 cgcgc ugcgc 3.566 1.81e-04
1043 cgcgc cucgc 3.036 1.20e-03
1056 cgcgc agcgc 2.916 1.77e-03
1341 cgcgc uacgc 1.675 4.70e-02
1346 cgcgc agcgc 1.735 4.14e-02
Protein: FXR1(Hs/Mm)
Sequence Position Motif K-mer Z-score P-value
450 aygacr uaugac 1.986 2.35e-02
462 aygacr uacgac 1.857 3.17e-02
1494 aygacr aacguc 2.271 1.16e-02
1681 aygacr aacgac 2.057 1.98e-02
1751 aygacr aacgau 2.686 3.62e-03
1770 aygacr aauguc 3.243 5.91e-04
1782 aygacr aaucac 2.357 9.21e-03
Protein: FXR2(Hs/Mm)
Sequence Position Motif K-mer Z-score P-value
71 dgacrrr ggaagag 2.057 1.98e-02
80 dgacrrr gggcgag 2.057 1.98e-02
776 dgacrrr cgacgag 1.686 4.59e-02
1397 dgacrrr ggacagu 2.200 1.39e-02
Protein: G3BP2(Hs/Mm)
Sequence Position Motif K-mer Z-score P-value
1174 aggaudr aggagga 3.133 8.65e-04
1177 aggaudr aggaaca 2.747 3.01e-03
1186 aggaudr aagauga 3.173 7.54e-04
1192 aggaudr aggaaga 3.133 8.65e-04
1809 aggaudr augauca 1.800 3.59e-02
Protein: HNRNPA1(Hs/Mm)
Sequence Position Motif K-mer Z-score P-value
37 rgnyag aggcag 3.145 8.30e-04
41 duagggw agaggga 1.662 4.83e-02
62 rgnyag ggcuag 2.909 1.81e-03
64 duagggw cuagggu 1.851 3.21e-02
112 duagggw gaaggga 1.716 4.31e-02
131 duagggw auagggg 1.932 2.67e-02
1397 rgnyag ggacag 2.200 1.39e-02
1416 rgnyag agacag 2.255 1.21e-02
1733 duagggw guaagga 2.568 5.11e-03
Protein: HNRNPA1L2(Hs/Mm)
Sequence Position Motif K-mer Z-score P-value
64 duagggw cuagggu 1.873 3.05e-02
131 duagggw auagggg 1.718 4.29e-02
1733 duagggw guaagga 2.296 1.08e-02
Protein: HNRNPA2B1(Hs/Mm)
Sequence Position Motif K-mer Z-score P-value
41 duagggw agaggga 1.800 3.59e-02
64 duagggw cuagggu 1.853 3.19e-02
112 duagggw gaaggga 1.853 3.19e-02
131 duagggw auagggg 1.947 2.58e-02
1733 duagggw guaagga 2.560 5.23e-03
2093 gguaguag gguacuau 2.569 5.10e-03
Protein: HNRNPC(Hs/Mm)
Sequence Position Motif K-mer Z-score P-value
378 huuuuuk gauuuuu 2.786 2.67e-03
379 huuuuuk auuuuuu 3.473 2.57e-04
380 huuuuuk uuuuuuu 3.348 4.07e-04
381 huuuuuk uuuuuuc 3.170 7.62e-04
1534 huuuuuk gcuuuuu 2.366 8.99e-03
1535 huuuuuk cuuuuuu 2.839 2.26e-03
1536 huuuuuk uuuuuug 2.759 2.90e-03
1906 huuuuuk acuuuuu 3.268 5.42e-04
1907 huuuuuk cuuuuuu 3.643 1.35e-04
1908 huuuuuk uuuuuua 3.339 4.20e-04
1909 huuuuuk uuuuuau 3.018 1.27e-03
1923 huuuuuk aucuuuu 3.268 5.42e-04
1924 huuuuuk ucuuuuu 3.018 1.27e-03
1925 huuuuuk cuuuuuu 3.643 1.35e-04
1926 huuuuuk uuuuuuu 3.634 1.40e-04
1927 huuuuuk uuuuuuu 3.634 1.40e-04
1928 huuuuuk uuuuuuu 3.634 1.40e-04
1929 huuuuuk uuuuuuu 3.634 1.40e-04
1930 huuuuuk uuuuuuc 3.402 3.34e-04
1931 huuuuuk uuuuucu 3.018 1.27e-03
1932 huuuuuk uuuucuu 3.018 1.27e-03
1933 huuuuuk uuucuuu 3.009 1.31e-03
1945 huuuuuk auuugua 2.964 1.52e-03
1959 huuuuuk auuguuu 2.759 2.90e-03
1960 huuuuuk uuguuuu 2.563 5.19e-03
1961 huuuuuk uguuuuu 2.563 5.19e-03
1962 huuuuuk guuuuua 2.750 2.98e-03
1972 huuuuuk aauuuua 2.527 5.75e-03
1973 huuuuuk auuuuaa 2.527 5.75e-03
1990 huuuuuk auguuuc 1.964 2.48e-02
2108 huuuuuk aauuuuu 3.339 4.20e-04
2109 huuuuuk auuuuuu 3.804 7.12e-05
2110 huuuuuk uuuuuuu 3.679 1.17e-04
2111 huuuuuk uuuuuuu 3.679 1.17e-04
2112 huuuuuk uuuuuua 3.411 3.24e-04
2113 huuuuuk uuuuuau 3.098 9.74e-04
2114 huuuuuk uuuuauu 3.098 9.74e-04
2115 huuuuuk uuuauuu 3.098 9.74e-04
Protein: HNRNPCL1(Hs/Mm)
Sequence Position Motif K-mer Z-score P-value
378 huuuuuk gauuuuu 2.781 2.71e-03
379 huuuuuk auuuuuu 3.456 2.74e-04
380 huuuuuk uuuuuuu 3.351 4.03e-04
381 huuuuuk uuuuuuc 3.149 8.19e-04
1534 huuuuuk gcuuuuu 2.377 8.73e-03
1535 huuuuuk cuuuuuu 2.833 2.31e-03
1536 huuuuuk uuuuuug 2.746 3.02e-03
1906 huuuuuk acuuuuu 3.263 5.51e-04
1907 huuuuuk cuuuuuu 3.649 1.32e-04
1908 huuuuuk uuuuuua 3.351 4.03e-04
1909 huuuuuk uuuuuau 3.053 1.13e-03
1923 huuuuuk aucuuuu 3.263 5.51e-04
1924 huuuuuk ucuuuuu 3.053 1.13e-03
1925 huuuuuk cuuuuuu 3.649 1.32e-04
1926 huuuuuk uuuuuuu 3.658 1.27e-04
1927 huuuuuk uuuuuuu 3.658 1.27e-04
1928 huuuuuk uuuuuuu 3.658 1.27e-04
1929 huuuuuk uuuuuuu 3.658 1.27e-04
1930 huuuuuk uuuuuuc 3.395 3.43e-04
1931 huuuuuk uuuuucu 3.053 1.13e-03
1932 huuuuuk uuuucuu 3.053 1.13e-03
1933 huuuuuk uuucuuu 3.044 1.17e-03
1945 huuuuuk auuugua 2.939 1.65e-03
1959 huuuuuk auuguuu 2.746 3.02e-03
1960 huuuuuk uuguuuu 2.570 5.08e-03
1961 huuuuuk uguuuuu 2.570 5.08e-03
1962 huuuuuk guuuuua 2.737 3.10e-03
1972 huuuuuk aauuuua 2.474 6.68e-03
1973 huuuuuk auuuuaa 2.474 6.68e-03
2108 huuuuuk aauuuuu 3.316 4.57e-04
2109 huuuuuk auuuuuu 3.789 7.56e-05
2110 huuuuuk uuuuuuu 3.684 1.15e-04
2111 huuuuuk uuuuuuu 3.684 1.15e-04
2112 huuuuuk uuuuuua 3.404 3.32e-04
2113 huuuuuk uuuuuau 3.114 9.23e-04
2114 huuuuuk uuuuauu 3.114 9.23e-04
2115 huuuuuk uuuauuu 3.114 9.23e-04
Protein: HNRNPF(Hs/Mm)
Sequence Position Motif K-mer Z-score P-value
44 gggug gggag 2.062 1.96e-02
54 gggug gggcg 2.062 1.96e-02
67 gggug gggug 2.955 1.56e-03
80 gggug gggcg 2.062 1.96e-02
Protein: HNRNPH1(Hs/Mm)
Sequence Position Motif K-mer Z-score P-value
72 gargag gaagag 2.920 1.75e-03
86 gargag gcagag 2.510 6.04e-03
492 gargag gacgag 2.730 3.17e-03
495 gargag gaggag 2.890 1.93e-03
498 gargag gaggag 2.890 1.93e-03
1173 gargag gaggag 3.610 1.53e-04
1176 gargag gaggaa 3.180 7.36e-04
1185 gargag gaagau 3.410 3.25e-04
1188 gargag gaugag 3.490 2.42e-04
1191 gargag gaggaa 3.180 7.36e-04
1194 gargag gaagaa 3.590 1.65e-04
1218 gargag gaaaag 2.420 7.76e-03
1467 gargag gaggag 2.550 5.39e-03
1478 gargag caagag 2.340 9.64e-03
1511 gargag gaggag 1.650 4.95e-02
1638 gargag gcagag 2.700 3.47e-03
1641 gargag gaggag 3.460 2.70e-04
1662 gargag gaagag 3.950 3.91e-05
1684 gargag gacgag 3.250 5.77e-04
1689 gargag gaacag 2.770 2.80e-03
Protein: HNRNPH2(Hs/Mm)
Sequence Position Motif K-mer Z-score P-value
44 gggaggg gggagcg 2.922 1.74e-03
54 gggaggg gggcggc 2.778 2.73e-03
67 gggaggg gggugga 2.478 6.61e-03
110 gggaggg gggaagg 2.767 2.83e-03
111 gggaggg ggaaggg 2.789 2.64e-03
1363 gggaggg ggaagga 1.711 4.35e-02
Protein: HNRNPK(Hs/Mm)
Sequence Position Motif K-mer Z-score P-value
152 ccawmcc ccagccc 3.406 3.30e-04
156 ccawmcc cccuccc 3.072 1.06e-03
172 ccawmcc ccagcca 3.304 4.77e-04
186 ccawmcc gcaaccc 2.275 1.15e-02
585 ccawmcc cccaccc 3.319 4.52e-04
586 ccawmcc ccacccc 3.449 2.81e-04
603 ccawmcc ccuagcc 3.029 1.23e-03
900 ccawmcc ccgaacc 2.754 2.94e-03
901 ccawmcc cgaaccc 2.899 1.87e-03
1003 ccawmcc ccuaccc 2.261 1.19e-02
1121 ccawmcc cgagccc 2.261 1.19e-02
1279 ccawmcc gcaaacc 2.029 2.12e-02
1291 ccawmcc acagccc 1.913 2.79e-02
Protein: HNRNPL(Hs/Mm)
Sequence Position Motif K-mer Z-score P-value
251 acacrav acaacac 2.563 5.19e-03
254 acacrav acacccg 2.634 4.22e-03
256 acacrav acccgag 2.648 4.05e-03
268 acacrav acgcgac 2.648 4.05e-03
646 amayama ucacacc 1.840 3.29e-02
1146 acacrav acaccgc 1.915 2.77e-02
1324 amayama ccacaca 2.573 5.04e-03
1326 acacrav acacauc 2.394 8.33e-03
1334 acacrav gcacaac 2.296 1.08e-02
1486 amayama gaacaca 3.200 6.87e-04
1488 amayama acacaca 3.360 3.90e-04
1490 amayama acacaac 2.920 1.75e-03
1698 amayama aaacaca 3.120 9.04e-04
1700 amayama acacaaa 3.147 8.25e-04
1702 amayama acaaacu 2.587 4.84e-03
Protein: HNRNPU(Hs/Mm)
Sequence Position Motif K-mer Z-score P-value
1948 uguauug uguauuu 2.281 1.13e-02
1956 uguauug agaauug 2.078 1.89e-02
Protein: HNRPLL(Hs/Mm)
Sequence Position Motif K-mer Z-score P-value
646 rcahaca ucacacc 1.734 4.15e-02
1486 rcahaca gaacaca 3.152 8.11e-04
1488 rcahaca acacaca 3.304 4.77e-04
1617 rcahaca gcauaca 1.684 4.61e-02
1698 rcahaca aaacaca 2.722 3.24e-03
1700 rcahaca acacaaa 2.722 3.24e-03
1702 rcahaca acaaacu 2.494 6.32e-03
1780 rcahaca gcaauca 1.924 2.72e-02
1823 rcahaca ccucaca 1.684 4.61e-02
Protein: HuR(Hs/Mm)
Sequence Position Motif K-mer Z-score P-value
376 uukruuu uggauuu 2.549 5.40e-03
379 uukruuu auuuuuu 2.516 5.93e-03
380 uukruuu uuuuuuu 2.725 3.22e-03
1907 uukruuu cuuuuuu 2.780 2.72e-03
1925 uukruuu cuuuuuu 2.802 2.54e-03
1926 uukruuu uuuuuuu 3.330 4.34e-04
1927 uukruuu uuuuuuu 3.330 4.34e-04
1928 uukruuu uuuuuuu 3.330 4.34e-04
1929 uukruuu uuuuuuu 3.330 4.34e-04
1933 uukruuu uuucuuu 3.264 5.49e-04
1946 uukruuu uuuguau 3.110 9.35e-04
1947 uukruuu uuguauu 3.044 1.17e-03
1959 uukruuu auuguuu 3.055 1.13e-03
1960 uukruuu uuguuuu 3.176 7.47e-04
2106 uukruuu cuaauuu 2.945 1.61e-03
2109 uukruuu auuuuuu 3.044 1.17e-03
2110 uukruuu uuuuuuu 3.429 3.03e-04
2111 uukruuu uuuuuuu 3.429 3.03e-04
2115 uukruuu uuuauuu 3.538 2.02e-04
Protein: IGF2BP2(Hs/Mm)
Sequence Position Motif K-mer Z-score P-value
792 vmahwca aaaaaca 2.479 6.59e-03
1617 vmahwca gcauaca 2.137 1.63e-02
1696 vmahwca ugaaaca 2.589 4.81e-03
1698 vmahwca aaacaca 2.849 2.19e-03
1702 vmahwca acaaacu 2.603 4.62e-03
1780 vmahwca gcaauca 2.027 2.13e-02
1803 vmahwca aaaugca 2.000 2.27e-02
Protein: IGF2BP3(Hs/Mm)
Sequence Position Motif K-mer Z-score P-value
792 amahwca aaaaaca 2.373 8.82e-03
1698 amahwca aaacaca 2.537 5.59e-03
1700 amahwca acacaaa 2.284 1.12e-02
1702 amahwca acaaacu 2.134 1.64e-02
1803 amahwca aaaugca 1.881 3.00e-02
Protein: KHDRBS1(Hs/Mm)
Sequence Position Motif K-mer Z-score P-value
1603 auaaaav uuaaaaa 2.691 3.56e-03
1605 auaaaav aaaaaag 2.629 4.28e-03
1966 auaaaav uuaaaaa 2.887 1.94e-03
1968 auaaaav aaaaaau 2.711 3.35e-03
2012 auaaaav auuaaau 3.072 1.06e-03
2013 auaaaav uuaaaug 2.825 2.36e-03
2029 auaaaav uuaauaa 2.804 2.52e-03
2032 auaaaav auaaaac 3.392 3.47e-04
2099 auaaaav auaaacc 1.866 3.10e-02
Protein: KHDRBS2(Hs/Mm)
Sequence Position Motif K-mer Z-score P-value
1602 rauaaam cuuaaaa 1.659 4.86e-02
1604 rauaaam uaaaaaa 1.647 4.98e-02
1965 rauaaam uuuaaaa 1.671 4.74e-02
1967 rauaaam uaaaaaa 1.671 4.74e-02
2011 rauaaam cauuaaa 2.800 2.56e-03
2031 rauaaam aauaaaa 3.165 7.75e-04
Protein: KHDRBS3(Hs/Mm)
Sequence Position Motif K-mer Z-score P-value
1602 auaaav cuuaaa 2.113 1.73e-02
1604 auaaav uaaaaa 2.113 1.73e-02
1605 auaaav aaaaaa 2.151 1.57e-02
1618 auaaav cauaca 2.113 1.73e-02
1789 auaaav uaugaa 1.849 3.22e-02
1965 auaaav uuuaaa 1.717 4.30e-02
1967 auaaav uaaaaa 1.717 4.30e-02
1968 auaaav aaaaaa 1.755 3.96e-02
1999 auaaav uguaaa 2.330 9.90e-03
2011 auaaav cauuaa 2.811 2.47e-03
2012 auaaav auuaaa 2.868 2.07e-03
2018 auaaav uguaaa 2.811 2.47e-03
2022 auaaav aauaac 2.868 2.07e-03
2031 auaaav aauaaa 3.151 8.14e-04
Protein: LIN28A(Hs/Mm)
Sequence Position Motif K-mer Z-score P-value
496 hggagwa aggagga 1.878 3.02e-02
499 hggagwa aggagaa 3.135 8.59e-04
712 hggagwa uggagau 2.541 5.53e-03
734 hggagwa gggagga 3.000 1.35e-03
737 hggagwa aggagac 3.122 8.98e-04
745 hggagwa uggugaa 2.365 9.02e-03
1174 hggagwa aggagga 2.324 1.01e-02
1193 hggagwa ggaagaa 2.703 3.44e-03
1468 hggagwa aggagaa 3.054 1.13e-03
1482 hggagwa aggcgaa 3.135 8.59e-04
1512 hggagwa aggagga 2.716 3.30e-03
1642 hggagwa aggagca 2.135 1.64e-02
Protein: MATR3(Hs/Mm)
Sequence Position Motif K-mer Z-score P-value
207 maucuur aaacuuu 1.784 3.72e-02
1704 maucuur aaacuug 1.797 3.62e-02
1723 maucuur acucuug 1.757 3.95e-02
1829 maucuur aaccuug 1.716 4.31e-02
1840 maucuur agucuug 1.716 4.31e-02
1922 maucuur caucuuu 2.459 6.97e-03
1989 maucuur aauguuu 2.081 1.87e-02
2003 maucuur aauauug 2.284 1.12e-02
Protein: MBNL1(Hs/Mm)
Sequence Position Motif K-mer Z-score P-value
90 ygcuky agcugc 2.402 8.15e-03
93 ygcuky ugcgcu 1.784 3.72e-02
95 ygcuky cgcugc 2.814 2.45e-03
98 ygcuky ugcggg 1.843 3.27e-02
102 ygcuky ggcguc 1.843 3.27e-02
106 ygcuky uccugg 1.843 3.27e-02
137 ygcuky ggcuuc 2.275 1.15e-02
142 ygcuky cgccuc 2.284 1.12e-02
162 ygcuky cgcuga 2.294 1.09e-02
194 ygcuky ugccgc 2.088 1.84e-02
197 ygcuky cgcauc 2.088 1.84e-02
296 ygcuky uucugc 2.294 1.09e-02
301 ygcuky cccauu 2.039 2.07e-02
302 ygcuky ccauuu 2.039 2.07e-02
313 ygcuky cacuuc 3.059 1.11e-03
318 ygcuky ccccgc 2.275 1.15e-02
321 ygcuky cgccgc 3.059 1.11e-03
324 ygcuky cgcugc 3.618 1.48e-04
337 ygcuky cgcuuc 3.706 1.05e-04
340 ygcuky uucucu 2.284 1.12e-02
342 ygcuky cucuga 2.284 1.12e-02
350 ygcuky ggcucu 2.069 1.93e-02
352 ygcuky cucucc 2.069 1.93e-02
354 ygcuky cuccuu 2.069 1.93e-02
355 gcuugc uccuug 2.883 1.97e-03
356 ygcuky ccuugc 2.069 1.93e-02
359 ygcuky ugcagc 2.863 2.10e-03
362 ygcuky agcugc 2.863 2.10e-03
365 ygcuky ugcuua 2.402 8.15e-03
373 ygcuky cgcugg 2.402 8.15e-03
415 ygcuky cgaugc 2.039 2.07e-02
432 ygcuky agcuuc 1.990 2.33e-02
469 ygcuky cggugc 2.294 1.09e-02
472 ygcuky ugcagc 2.294 1.09e-02
486 ygcuky uacugc 2.294 1.09e-02
532 ygcuky agcugc 2.078 1.89e-02
535 ygcuky ugcagc 2.069 1.93e-02
577 ygcuky agcugc 2.500 6.21e-03
580 ygcuky ugcugc 2.912 1.80e-03
589 ygcuky ccccgc 2.039 2.07e-02
592 ygcuky cgcccc 2.039 2.07e-02
595 ygcuky cccugu 2.843 2.23e-03
609 ygcuky cgccgc 2.402 8.15e-03
612 ygcuky cgcucc 2.402 8.15e-03
619 ygcuky ggcucu 1.676 4.69e-02
621 ygcuky cucugc 2.451 7.12e-03
624 ygcuky ugcucg 1.657 4.88e-02
628 ygcuky cgcccu 1.676 4.69e-02
630 ygcuky cccucc 1.676 4.69e-02
633 ygcuky uccuac 1.676 4.69e-02
636 ygcuky uacguu 1.676 4.69e-02
638 ygcuky cguugc 2.451 7.12e-03
641 ygcuky ugcggu 2.451 7.12e-03
651 ygcuky cccuuc 2.392 8.38e-03
658 ygcuky cccuuc 2.392 8.38e-03
709 gcuugc agcugg 2.130 1.66e-02
727 ygcuky agcugc 1.892 2.92e-02
730 ygcuky ugcugg 1.892 2.92e-02
825 ygcuky ggcuuc 2.088 1.84e-02
836 ygcuky cgccgc 2.088 1.84e-02
844 gcuugc agcucg 2.078 1.89e-02
912 ygcuky cgcggc 2.088 1.84e-02
927 ygcuky ugcucc 2.088 1.84e-02
962 ygcuky cgccgc 2.373 8.82e-03
965 ygcuky cgccgc 2.373 8.82e-03
968 ygcuky cgccuc 2.392 8.38e-03
978 ygcuky ugcauc 2.392 8.38e-03
1035 ygcuky uccugc 2.245 1.24e-02
1040 ygcuky cgccuc 2.284 1.12e-02
1058 ygcuky cgccuu 2.402 8.15e-03
1059 ygcuky gccuuc 1.657 4.88e-02
1081 ygcuky cucugc 2.294 1.09e-02
1084 ygcuky ugcucu 2.098 1.80e-02
1129 ygcuky uggugc 2.039 2.07e-02
1132 ygcuky ugcucc 1.990 2.33e-02
1202 ygcuky cgaugu 2.196 1.40e-02
1205 ygcuky uguugu 2.294 1.09e-02
1208 ygcuky uguuuc 2.353 9.31e-03
1211 ygcuky uucugu 2.353 9.31e-03
1262 ygcuky uucugc 2.039 2.07e-02
1265 ygcuky ugcugg 2.069 1.93e-02
1343 ygcuky cgcagc 1.990 2.33e-02
1348 ygcuky cgccuc 2.196 1.40e-02
1352 ygcuky ucccuc 1.990 2.33e-02
1353 ygcuky cccucc 1.941 2.61e-02
1373 ygcuky uccugc 2.500 6.21e-03
1376 ygcuky ugcugc 2.706 3.41e-03
1533 ygcuky agcuuu 2.069 1.93e-02
1543 ygcuky cccugc 2.078 1.89e-02
1753 ygcuky cgauuc 1.892 2.92e-02
1757 ygcuky uccuuc 1.686 4.59e-02
1806 gcuugc ugcaug 2.143 1.61e-02
1830 gcuugc accuug 2.273 1.15e-02
1915 ygcuky ugcuua 2.098 1.80e-02
1934 ygcuky uucuuu 2.098 1.80e-02
1991 ygcuky uguuuc 2.039 2.07e-02
1996 ygcuky cucugu 2.039 2.07e-02
2107 ygcuky uaauuu 1.676 4.69e-02
2110 ygcuky uuuuuu 1.686 4.59e-02
2111 ygcuky uuuuuu 1.686 4.59e-02
2112 ygcuky uuuuuu 1.686 4.59e-02
2116 ygcuky uuauuu 1.686 4.59e-02
2125 ygcuky uacauu 1.892 2.92e-02
Protein: MSI1(Hs/Mm)
Sequence Position Motif K-mer Z-score P-value
2069 uaguwrg uaguaua 2.985 1.42e-03
2076 uaguwrg uaguacc 2.818 2.42e-03
2083 uaguwrg uaguauu 2.818 2.42e-03
2091 uaguwrg uagguac 2.879 1.99e-03
Protein: NOVA1(Hs/Mm)
Sequence Position Motif K-mer Z-score P-value
787 ycay ucau 2.750 2.98e-03
799 ycay ucau 2.750 2.98e-03
802 ycay ucau 2.750 2.98e-03
1136 ycay ccau 2.750 2.98e-03
1153 ycay ccac 2.750 2.98e-03
1156 ycay ccac 2.750 2.98e-03
1274 ycay ccac 3.380 3.62e-04
1289 ycay ucac 2.750 2.98e-03
1296 ycay ccac 3.380 3.62e-04
1316 ycay ccac 2.750 2.98e-03
Protein: PABPC1(Hs/Mm)
Sequence Position Motif K-mer Z-score P-value
790 araaaam ucaaaaa 2.314 1.03e-02
792 araaaam aaaaaca 2.392 8.38e-03
1196 araaaam agaaauc 2.186 1.44e-02
1568 araaaam ggaaaac 2.324 1.01e-02
1570 araaaam aaaacaa 2.324 1.01e-02
1603 araaaam uuaaaaa 2.333 9.82e-03
1604 araaaam uaaaaaa 2.490 6.39e-03
1605 araaaam aaaaaag 2.490 6.39e-03
1736 araaaam aggaaaa 2.392 8.38e-03
1746 araaaam aggaaaa 2.667 3.83e-03
1747 araaaam ggaaaac 2.569 5.10e-03
1898 araaaam auaaaag 1.735 4.14e-02
1900 araaaam aaaagaa 1.745 4.05e-02
1966 araaaam uuaaaaa 2.353 9.31e-03
1967 araaaam uaaaaaa 2.510 6.04e-03
1968 araaaam aaaaaau 2.539 5.56e-03
Protein: PABPC3(Hs/Mm)
Sequence Position Motif K-mer Z-score P-value
396 raaaacm gaaaacc 2.909 1.81e-03
397 raaaacm aaaacca 2.307 1.05e-02
792 raaaacm aaaaaca 1.761 3.91e-02
1218 raaaacm gaaaaga 2.080 1.88e-02
1569 raaaacm gaaaaca 2.818 2.42e-03
1578 raaaacm gaaaagg 2.386 8.52e-03
1604 raaaacm uaaaaaa 2.432 7.51e-03
1605 raaaacm aaaaaag 2.375 8.77e-03
1606 raaaacm aaaaagc 2.591 4.78e-03
1607 raaaacm aaaagcc 2.523 5.82e-03
1678 raaaacm ggaaacg 2.625 4.33e-03
1687 raaaacm gagaaca 2.784 2.68e-03
1698 raaaacm aaacaca 2.659 3.92e-03
1738 raaaacm gaaaagu 2.273 1.15e-02
1748 raaaacm gaaaacg 2.591 4.78e-03
1967 raaaacm uaaaaaa 1.784 3.72e-02
1968 raaaacm aaaaaau 1.750 4.01e-02
1969 raaaacm aaaaauu 1.750 4.01e-02
Protein: PABPC4(Hs/Mm)
Sequence Position Motif K-mer Z-score P-value
790 aaaaaar ucaaaaa 2.291 1.10e-02
791 aaaaaar caaaaac 2.391 8.40e-03
792 aaaaaar aaaaaca 2.609 4.54e-03
1218 aaaaaar gaaaaga 2.245 1.24e-02
1219 aaaaaar aaaagag 2.182 1.46e-02
1569 aaaaaar gaaaaca 2.227 1.30e-02
1570 aaaaaar aaaacaa 2.318 1.02e-02
1604 aaaaaar uaaaaaa 2.791 2.63e-03
1605 aaaaaar aaaaaag 2.882 1.98e-03
1606 aaaaaar aaaaagc 2.600 4.66e-03
1898 aaaaaar auaaaag 2.455 7.04e-03
1899 aaaaaar uaaaaga 2.409 8.00e-03
1900 aaaaaar aaaagaa 2.545 5.46e-03
1967 aaaaaar uaaaaaa 2.709 3.37e-03
1968 aaaaaar aaaaaau 2.736 3.11e-03
1969 aaaaaar aaaaauu 2.473 6.70e-03
2031 aaaaaar aauaaaa 2.464 6.87e-03
2032 aaaaaar auaaaac 2.336 9.75e-03
Protein: PABPC5(Hs/Mm)
Sequence Position Motif K-mer Z-score P-value
1184 agaaadu agaagau 2.125 1.68e-02
1196 agaaadu agaaauc 2.636 4.19e-03
1217 agaaadu ggaaaag 1.795 3.63e-02
1568 agaaadu ggaaaac 1.682 4.63e-02
1737 agaaadu ggaaaag 2.227 1.30e-02
1747 agaaadu ggaaaac 2.602 4.63e-03
1767 agaaadu agaaaug 1.966 2.46e-02
1903 agaaadu agaacuu 1.659 4.86e-02
1968 agaaadu aaaaaau 1.648 4.97e-02
Protein: PABPN1(Hs/Mm)
Sequence Position Motif K-mer Z-score P-value
1181 araaga acaaga 3.185 7.24e-04
1184 araaga agaaga 3.454 2.76e-04
1187 araaga agauga 3.028 1.23e-03
1193 araaga ggaaga 3.120 9.04e-04
1219 araaga aaaaga 2.537 5.59e-03
1570 araaga aaaaca 2.065 1.95e-02
1637 araaga agcaga 2.565 5.16e-03
1640 araaga agagga 2.704 3.43e-03
1661 araaga ugaaga 2.750 2.98e-03
1664 araaga agagga 2.889 1.93e-03
1688 araaga agaaca 2.194 1.41e-02
Protein: PCBP1(Hs/Mm)
Sequence Position Motif K-mer Z-score P-value
151 ccwwhcc cccagcc 2.506 6.11e-03
152 ccwwhcc ccagccc 2.506 6.11e-03
156 ccwwhcc cccuccc 2.688 3.59e-03
171 ccwwhcc cccagcc 2.974 1.47e-03
191 ccwwhcc ccuugcc 2.909 1.81e-03
585 ccwwhcc cccaccc 3.169 7.65e-04
586 ccwwhcc ccacccc 3.091 9.97e-04
596 ccwwhcc ccugucc 3.455 2.75e-04
603 ccwwhcc ccuagcc 3.442 2.89e-04
611 ccwwhcc ccgcucc 2.948 1.60e-03
997 ccwwhcc ucuuccc 2.390 8.42e-03
1002 ccwwhcc cccuacc 2.727 3.20e-03
1003 ccwwhcc ccuaccc 2.753 2.95e-03
1102 ccwwhcc ccucccc 2.013 2.21e-02
Protein: PCBP2(Hs/Mm)
Sequence Position Motif K-mer Z-score P-value
156 ccyycch cccuccc 2.463 6.89e-03
157 ccyycch ccucccg 2.250 1.22e-02
314 ccyycch acuuccc 2.088 1.84e-02
315 ccyycch cuucccc 2.050 2.02e-02
585 ccyycch cccaccc 2.962 1.53e-03
586 ccyycch ccacccc 2.925 1.72e-03
590 ccyycch cccgccc 2.925 1.72e-03
591 ccyycch ccgcccc 2.925 1.72e-03
997 ccyycch ucuuccc 3.075 1.05e-03
998 ccyycch cuucccc 2.950 1.59e-03
1002 ccyycch cccuacc 2.850 2.19e-03
1003 ccyycch ccuaccc 3.163 7.81e-04
1350 ccyycch ccucccu 2.562 5.20e-03
1353 ccyycch cccucca 2.538 5.57e-03
Protein: PCBP3(Hs/Mm)
Sequence Position Motif K-mer Z-score P-value
192 uuuycc cuugcc 1.865 3.11e-02
210 uuuycc cuuugc 2.486 6.46e-03
235 uuuycc cuuugc 1.959 2.51e-02
314 uuuycc acuucc 1.811 3.51e-02
315 uuuycc cuuccc 1.811 3.51e-02
Protein: PPRC1(Hs/Mm)
Sequence Position Motif K-mer Z-score P-value
48 ssgcgcs gcgagcg 2.026 2.14e-02
52 ssgcgcs gcgggcg 2.026 2.14e-02
99 ssgcgcs gcgggcg 2.462 6.91e-03
589 ssgcgcs ccccgcc 2.064 1.95e-02
877 ssgcgcs cugcgcg 1.705 4.41e-02
879 ssgcgcs gcgcgca 1.744 4.06e-02
905 ssgcgcs ccccgcc 2.795 2.60e-03
907 ssgcgcs ccgcccg 2.795 2.60e-03
909 ssgcgcs gcccgcg 2.936 1.66e-03
959 ssgcgcs gagcgcc 2.115 1.72e-02
1037 ssgcgcs cugcgcc 2.282 1.12e-02
Protein: PTBP1(Hs/Mm)
Sequence Position Motif K-mer Z-score P-value
272 cucucu gacucu 1.741 4.08e-02
274 cucucu cucucc 2.107 1.76e-02
276 cucucu cucccg 1.741 4.08e-02
335 cucucu cccgcu 2.098 1.80e-02
340 cucucu uucucu 2.652 4.00e-03
342 cucucu cucuga 2.098 1.80e-02
350 cucucu ggcucu 2.098 1.80e-02
352 cucucu cucucc 2.652 4.00e-03
354 cucucu cuccuu 2.098 1.80e-02
649 cucucu cacccu 1.920 2.74e-02
652 cucucu ccuucu 1.911 2.80e-02
654 cucucu uucucc 1.884 2.98e-02
656 cucucu cucccu 2.214 1.34e-02
987 cucucu cccucg 2.027 2.13e-02
989 cucucu cucggu 2.027 2.13e-02
997 ucuu ucuu 2.161 1.53e-02
1007 cucucu cccucu 2.625 4.33e-03
1009 cucucu cucuca 2.625 4.33e-03
1010 ucuu ucuc 1.884 2.98e-02
1025 cucucu cucgcc 2.027 2.13e-02
1043 cucucu cucgca 2.098 1.80e-02
1060 cucucu ccuucu 2.205 1.37e-02
1062 cucucu uucucu 2.955 1.56e-03
1064 cucucu cucucc 2.955 1.56e-03
1066 cucucu cuccgu 2.250 1.22e-02
1079 cucucu uucucu 2.955 1.56e-03
1081 cucucu cucugc 2.250 1.22e-02
1084 cucucu ugcucu 2.250 1.22e-02
1086 cucucu cucucc 2.946 1.61e-03
1103 cucucu cucccc 2.071 1.92e-02
1351 cucucu cucccu 2.205 1.37e-02
1353 cucucu cccucc 1.839 3.30e-02
1358 cucucu cacucg 1.839 3.30e-02
1370 cucucu cuaucc 1.839 3.30e-02
1725 ucuu ucuu 2.134 1.64e-02
1842 ucuu ucuu 2.161 1.53e-02
1906 ucuu acuu 2.161 1.53e-02
1908 ucuu uuuu 2.161 1.53e-02
1909 ucuu uuuu 2.161 1.53e-02
1910 ucuu uuuu 2.446 7.22e-03
1916 ucuu gcuu 2.446 7.22e-03
1924 ucuu ucuu 3.277 5.25e-04
1926 ucuu uuuu 2.446 7.22e-03
1927 ucuu uuuu 2.446 7.22e-03
1928 ucuu uuuu 2.446 7.22e-03
1929 ucuu uuuu 2.446 7.22e-03
1930 ucuu uuuu 2.446 7.22e-03
1931 ucuu uuuu 2.446 7.22e-03
1932 ucuu uuuu 2.446 7.22e-03
1935 ucuu ucuu 3.277 5.25e-04
1950 ucuu uauu 2.161 1.53e-02
1992 cucucu guuucu 1.893 2.92e-02
1994 cucucu uucucu 2.455 7.04e-03
1996 cucucu cucugu 2.455 7.04e-03
Protein: PUM2(Hs/Mm)
Sequence Position Motif K-mer Z-score P-value
1948 uguanaua uguauuua 2.989 1.40e-03
1961 uguanaua uguuuuua 2.852 2.17e-03
1965 uguanaua uuuaaaaa 2.830 2.33e-03
1999 uguanaua uguaaaua 4.295 8.73e-06
2018 uguanaua uguaaaua 4.375 6.07e-06
2070 uguanaua aguauaua 2.761 2.88e-03
2115 uguanaua uuuauuua 2.534 5.64e-03
2119 uguanaua uuuaagua 2.511 6.02e-03
2123 uguanaua aguacauu 2.568 5.11e-03
Protein: QKI(Hs/Mm)
Sequence Position Motif K-mer Z-score P-value
1761 acuaay ucuaac 2.022 2.16e-02
2012 acuaay auuaaa 2.467 6.81e-03
2022 acuaay aauaac 2.641 4.13e-03
2031 acuaay aauaaa 2.609 4.54e-03
2099 acuaay auaaac 1.793 3.65e-02
Protein: RALY(Hs/Mm)
Sequence Position Motif K-mer Z-score P-value
379 uuuuuub auuuuuu 3.080 1.03e-03
380 uuuuuub uuuuuuu 3.438 2.93e-04
381 uuuuuub uuuuuuc 3.429 3.03e-04
382 uuuuuub uuuuucg 3.268 5.42e-04
1535 uuuuuub cuuuuuu 2.420 7.76e-03
1536 uuuuuub uuuuuug 2.795 2.60e-03
1537 uuuuuub uuuuugc 2.446 7.22e-03
1907 uuuuuub cuuuuuu 3.330 4.34e-04
1908 uuuuuub uuuuuua 3.750 8.84e-05
1909 uuuuuub uuuuuau 3.321 4.48e-04
1910 uuuuuub uuuuaug 3.438 2.93e-04
1924 uuuuuub ucuuuuu 3.205 6.75e-04
1925 uuuuuub cuuuuuu 3.330 4.34e-04
1926 uuuuuub uuuuuuu 3.821 6.65e-05
1927 uuuuuub uuuuuuu 3.821 6.65e-05
1928 uuuuuub uuuuuuu 3.821 6.65e-05
1929 uuuuuub uuuuuuu 3.821 6.65e-05
1930 uuuuuub uuuuuuc 3.812 6.89e-05
1931 uuuuuub uuuuucu 3.375 3.69e-04
1932 uuuuuub uuuucuu 3.205 6.75e-04
1933 uuuuuub uuucuuu 3.205 6.75e-04
1934 uuuuuub uucuuua 3.125 8.89e-04
1960 uuuuuub uuguuuu 2.420 7.76e-03
1961 uuuuuub uguuuuu 2.420 7.76e-03
1962 uuuuuub guuuuua 2.455 7.04e-03
1963 uuuuuub uuuuuaa 2.446 7.22e-03
2109 uuuuuub auuuuuu 3.312 4.63e-04
2110 uuuuuub uuuuuuu 3.696 1.10e-04
2111 uuuuuub uuuuuuu 3.696 1.10e-04
2112 uuuuuub uuuuuua 3.643 1.35e-04
2113 uuuuuub uuuuuau 3.250 5.77e-04
2114 uuuuuub uuuuauu 3.143 8.36e-04
2115 uuuuuub uuuauuu 3.143 8.36e-04
2116 uuuuuub uuauuua 3.071 1.07e-03
Protein: RBM28(Hs/Mm)
Sequence Position Motif K-mer Z-score P-value
495 gwguagd gaggagg 2.236 1.27e-02
Protein: RBM3(Hs/Mm)
Sequence Position Motif K-mer Z-score P-value
1679 radacka gaaacga 1.737 4.12e-02
Protein: RBM4(Hs/Mm)
Sequence Position Motif K-mer Z-score P-value
48 gcgcgss gcgagcg 3.044 1.17e-03
50 gcgcgss gagcggg 3.209 6.66e-04
52 gcgcgss gcgggcg 3.099 9.71e-04
54 gcgcgss gggcggc 3.066 1.08e-03
94 gcgcgss gcgcugc 2.593 4.76e-03
99 gcgcgss gcgggcg 2.582 4.91e-03
224 gcgcgss gcgggcg 2.253 1.21e-02
226 gcgcgss gggcggg 2.363 9.06e-03
282 gcgcgss acgcggg 1.692 4.53e-02
685 gcgcgss gcgggag 1.802 3.58e-02
Protein: RBM41(Hs/Mm)
Sequence Position Motif K-mer Z-score P-value
1933 wuacwuk uuucuuu 1.728 4.20e-02
2013 wuacwuk uuaaaug 2.173 1.49e-02
2024 wuacwuk uaacuuu 2.259 1.19e-02
2124 wuacwuk guacauu 3.025 1.24e-03
Protein: RBM42(Hs/Mm)
Sequence Position Motif K-mer Z-score P-value
447 aacuamg aacuaug 2.486 6.46e-03
459 aacuamg gacuacg 2.243 1.24e-02
1741 aacuamg aaguaag 2.365 9.02e-03
2021 aacuamg aaauaac 1.811 3.51e-02
Protein: RBM45(Hs/Mm)
Sequence Position Motif K-mer Z-score P-value
669 gacgamv gacaacg 3.067 1.08e-03
672 gacgamv aacgacg 3.233 6.12e-04
675 gacgamv gacggcg 3.583 1.70e-04
774 gacgamv gacgacg 2.400 8.20e-03
777 gacgamv gacgaga 2.167 1.51e-02
1176 gacgamv gaggaac 2.167 1.51e-02
1194 gacgamv gaagaaa 2.267 1.17e-02
1467 gacgamv gaggaga 1.883 2.99e-02
1665 gacgamv gaggacu 3.633 1.40e-04
1681 gacgamv aacgacg 3.367 3.80e-04
1684 gacgamv gacgaga 3.533 2.05e-04
Protein: RBM46(Hs/Mm)
Sequence Position Motif K-mer Z-score P-value
788 rausawd caucaaa 1.974 2.42e-02
1575 rausawd aaugaaa 1.671 4.74e-02
1782 rausawd aaucacc 2.013 2.21e-02
1789 rausawd uaugaac 2.526 5.77e-03
1804 rausawd aaugcau 2.763 2.86e-03
1811 rausawd gaucaaa 2.724 3.22e-03
2022 rausawd aauaacu 2.395 8.31e-03
2031 rausawd aauaaaa 2.618 4.42e-03
Protein: RBM5(Hs/Mm)
Sequence Position Motif K-mer Z-score P-value
112 garggwr gaaggga 2.359 9.16e-03
1734 garggwr uaaggaa 2.513 5.99e-03
Protein: RBM6(Hs/Mm)
Sequence Position Motif K-mer Z-score P-value
803 hauccar cauccag 2.183 1.45e-02
1609 hauccar aagccac 2.958 1.55e-03
1622 hauccar cauccug 3.127 8.83e-04
1631 hauccar cguccaa 2.789 2.64e-03
1804 hauccar aaugcau 2.070 1.92e-02
1816 hauccar aaugcaa 2.169 1.50e-02
Protein: RBM8A(Hs/Mm)
Sequence Position Motif K-mer Z-score P-value
48 rygcgcb gcgagcg 3.541 1.99e-04
52 rygcgcb gcgggcg 3.568 1.80e-04
78 rygcgcb ccgggcg 3.189 7.14e-04
92 rygcgcb cugcgcu 3.027 1.23e-03
99 rygcgcb gcgggcg 3.297 4.89e-04
224 rygcgcb gcgggcg 2.541 5.53e-03
228 rygcgcb gcgggca 2.284 1.12e-02
529 rygcgcb gcgagcu 2.459 6.97e-03
546 rygcgcb gcgccca 2.459 6.97e-03
877 rygcgcb cugcgcg 1.878 3.02e-02
879 rygcgcb gcgcgca 2.027 2.13e-02
Protein: RBMS1(Hs/Mm)
Sequence Position Motif K-mer Z-score P-value
1980 kauauas gauuuac 2.452 7.10e-03
1982 kauauas uuuacac 2.356 9.24e-03
2001 kauauas uaaauau 2.575 5.01e-03
2003 kauauas aauauug 2.658 3.93e-03
2020 kauauas uaaauaa 2.781 2.71e-03
2040 kauauas uuuauag 2.781 2.71e-03
2072 kauauas uauauag 2.932 1.68e-03
2098 kauauas uauaaac 2.658 3.93e-03
2117 kauauas uauuuaa 2.164 1.52e-02
Protein: RBMS3(Hs/Mm)
Sequence Position Motif K-mer Z-score P-value
1950 hauaua uauuua 1.844 3.26e-02
2001 hauaua uaaaua 2.948 1.60e-03
2003 hauaua aauauu 2.875 2.02e-03
2016 hauaua aaugua 2.771 2.79e-03
2020 hauaua uaaaua 3.094 9.87e-04
2031 hauaua aauaaa 2.688 3.59e-03
2040 hauaua uuuaua 2.865 2.09e-03
2070 hauaua aguaua 2.708 3.38e-03
2072 hauaua uauaua 3.469 2.61e-04
2087 hauaua auuaua 3.146 8.28e-04
2096 hauaua acuaua 3.229 6.21e-04
2098 hauaua uauaaa 3.042 1.18e-03
2117 hauaua uauuua 2.823 2.38e-03
Protein: SAMD4A(Hs/Mm)
Sequence Position Motif K-mer Z-score P-value
52 gckgghm gcgggcg 2.753 2.95e-03
59 gckgghm gccggcu 2.580 4.94e-03
77 gckgghm gccgggc 3.185 7.24e-04
99 gckgghm gcgggcg 2.272 1.15e-02
224 gckgghm gcgggcg 2.284 1.12e-02
228 gckgghm gcgggca 2.333 9.82e-03
710 gckgghm gcuggag 2.765 2.85e-03
731 gckgghm gcuggga 1.654 4.91e-02
860 gckgghm gcuggcc 2.889 1.93e-03
Protein: SART3(Hs/Mm)
Sequence Position Motif K-mer Z-score P-value
790 araaaam ucaaaaa 2.324 1.01e-02
792 araaaam aaaaaca 2.402 8.15e-03
1196 araaaam agaaauc 2.186 1.44e-02
1568 araaaam ggaaaac 2.333 9.82e-03
1570 araaaam aaaacaa 2.333 9.82e-03
1603 araaaam uuaaaaa 2.343 9.56e-03
1604 araaaam uaaaaaa 2.500 6.21e-03
1605 araaaam aaaaaag 2.500 6.21e-03
1736 araaaam aggaaaa 2.392 8.38e-03
1746 araaaam aggaaaa 2.676 3.73e-03
1747 araaaam ggaaaac 2.569 5.10e-03
1898 araaaam auaaaag 1.745 4.05e-02
1900 araaaam aaaagaa 1.745 4.05e-02
1966 araaaam uuaaaaa 2.363 9.06e-03
1967 araaaam uaaaaaa 2.510 6.04e-03
1968 araaaam aaaaaau 2.539 5.56e-03
Protein: SNRNP70(Hs/Mm)
Sequence Position Motif K-mer Z-score P-value
1028 rwucaag gcccaag 1.740 4.09e-02
1799 rwucaag uuucaaa 2.438 7.38e-03
1811 rwucaag gaucaaa 1.781 3.75e-02
Protein: SNRPA(Hs/Mm)
Sequence Position Motif K-mer Z-score P-value
212 wugcacr uugccca 3.648 1.32e-04
237 wugcacr uugcacu 3.296 4.90e-04
1805 wugcacr augcaug 1.761 3.91e-02
Protein: SRSF1(Hs/Mm)
Sequence Position Motif K-mer Z-score P-value
255 crsmsgw cacccga 2.389 8.45e-03
494 gragga cgagga 2.516 5.93e-03
497 gragga ggagga 2.903 1.85e-03
500 gragga ggagaa 2.452 7.10e-03
564 ugrwgvh uggaaga 1.944 2.59e-02
565 ugrwgvh ggaagaa 1.944 2.59e-02
574 ugrwgvh ucgagcu 1.944 2.59e-02
580 ugrwgvh ugcugcc 1.944 2.59e-02
687 ugrwgvh gggagcu 2.333 9.82e-03
712 ugrwgvh uggagau 3.578 1.73e-04
715 ugrwgvh agauggu 2.833 2.31e-03
718 ugrwgvh uggugac 3.433 2.98e-04
734 ugrwgvh gggagga 3.156 8.00e-04
737 ugrwgvh aggagac 3.156 8.00e-04
745 ugrwgvh uggugaa 2.733 3.14e-03
748 ugrwgvh ugaacca 2.333 9.82e-03
1172 gragga ugagga 3.022 1.26e-03
1174 ugrwgvh aggagga 1.944 2.59e-02
1175 gragga ggagga 3.441 2.90e-04
1184 ugrwgvh agaagau 1.944 2.59e-02
1190 gragga ugagga 3.022 1.26e-03
1193 gragga ggaaga 3.097 9.77e-04
1253 ugrwgvh uggauca 1.744 4.06e-02
1265 ugrwgvh ugcugga 1.744 4.06e-02
1268 ugrwgvh uggaggc 2.133 1.65e-02
1509 crsmsgw cagagga 3.242 5.93e-04
1510 gragga agagga 2.484 6.50e-03
1513 gragga ggagga 2.871 2.05e-03
1517 gragga gaacga 2.312 1.04e-02
1640 gragga agagga 2.129 1.66e-02
1643 gragga ggagca 2.065 1.95e-02
1664 gragga agagga 2.129 1.66e-02
Protein: SRSF10(Hs/Mm)
Sequence Position Motif K-mer Z-score P-value
35 agagavm agaggca 2.265 1.18e-02
41 agagavm agaggga 2.253 1.21e-02
1414 agagavm ugagaca 1.880 3.01e-02
1416 agagavm agacaga 1.831 3.36e-02
1640 agagavm agaggag 1.807 3.54e-02
1664 agagavm agaggac 2.446 7.22e-03
Protein: SRSF2(Hs/Mm)
Sequence Position Motif K-mer Z-score P-value
142 ugcygyy cgccucu 1.818 3.45e-02
154 ugcygyy agcccuc 1.929 2.69e-02
159 ugcygyy ucccgcu 2.293 1.09e-02
162 ugcygyy cgcugau 1.929 2.69e-02
165 ugcygyy ugauccc 1.929 2.69e-02
178 ugcygyy agcgguc 2.111 1.74e-02
296 ugcygyy uucugcc 2.646 4.07e-03
299 ugcygyy ugcccau 2.253 1.21e-02
318 ugcygyy ccccgcc 2.253 1.21e-02
321 ugcygyy cgccgcu 2.889 1.93e-03
324 ugcygyy cgcugcc 2.646 4.07e-03
334 ugcygyy acccgcu 2.253 1.21e-02
337 ugcygyy cgcuucu 2.323 1.01e-02
350 ugcygyy ggcucuc 2.111 1.74e-02
359 ugcygyy ugcagcu 2.646 4.07e-03
362 ugcygyy agcugcu 2.535 5.62e-03
370 ugcygyy agacgcu 1.768 3.85e-02
418 ugcygyy ugccccu 1.949 2.56e-02
472 ugcygyy ugcagcc 2.172 1.49e-02
475 ugcygyy agccgua 1.818 3.45e-02
483 ugcygyy uucuacu 1.818 3.45e-02
486 ugcygyy uacugcg 1.818 3.45e-02
496 ggagwd aggagg 1.897 2.89e-02
499 ggagwd aggaga 3.080 1.03e-03
532 ugcygyy agcugca 1.818 3.45e-02
535 ugcygyy ugcagcc 1.949 2.56e-02
577 ugcygyy agcugcu 3.071 1.07e-03
580 ugcygyy ugcugcc 3.424 3.09e-04
583 ugcygyy ugcccac 2.646 4.07e-03
589 ugcygyy ccccgcc 2.707 3.39e-03
592 ugcygyy cgccccu 2.707 3.39e-03
595 ugcygyy cccuguc 2.707 3.39e-03
598 ugcygyy ugucccc 2.707 3.39e-03
606 ugcygyy agccgcc 2.758 2.91e-03
609 ugcygyy cgccgcu 2.747 3.01e-03
621 ugcygyy cucugcu 2.253 1.21e-02
624 ugcygyy ugcucgc 2.202 1.38e-02
628 ugcygyy cgcccuc 2.202 1.38e-02
641 ugcygyy ugcgguc 2.293 1.09e-02
687 ggagwd gggagc 2.184 1.45e-02
712 ggagwd uggaga 3.529 2.09e-04
734 ggagwd gggagg 3.161 7.86e-04
737 ggagwd aggaga 3.736 9.35e-05
822 ugcygyy agcggcu 1.768 3.85e-02
825 ugcygyy ggcuucu 1.768 3.85e-02
833 ugcygyy ggccgcc 2.313 1.04e-02
836 ugcygyy cgccgcc 2.535 5.62e-03
859 ugcygyy agcuggc 1.929 2.69e-02
1062 ugcygyy uucucuc 1.929 2.69e-02
1066 ugcygyy cuccguc 1.818 3.45e-02
1081 ugcygyy cucugcu 1.929 2.69e-02
1084 ugcygyy ugcucuc 2.172 1.49e-02
1101 ugcygyy uccuccc 1.818 3.45e-02
1113 ugcygyy ggcagcc 1.818 3.45e-02
1123 ugcygyy agccccu 1.929 2.69e-02
1129 ugcygyy uggugcu 2.172 1.49e-02
1132 ugcygyy ugcucca 1.818 3.45e-02
1205 ugcygyy uguuguu 2.172 1.49e-02
1208 ugcygyy uguuucu 1.929 2.69e-02
1211 ugcygyy uucugug 1.929 2.69e-02
1229 ugcygyy ggcuccu 1.818 3.45e-02
1272 gryymcyr ggccacag 1.909 2.81e-02
1294 gryymcyr gcccacug 1.909 2.81e-02
1352 ugcygyy ucccucc 2.131 1.65e-02
1373 ugcygyy uccugcu 2.667 3.83e-03
1376 ugcygyy ugcugcc 2.586 4.85e-03
1468 ggagwd aggaga 1.954 2.54e-02
1482 ggagwd aggcga 2.471 6.74e-03
1501 ggagwd uggagc 2.103 1.77e-02
1512 ggagwd aggagg 2.322 1.01e-02
1642 ggagwd aggagc 2.241 1.25e-02
Protein: SRSF3(Hs/Mm)
Sequence Position Motif K-mer Z-score P-value
140 cuckucy uucgccu 2.020 2.17e-02
142 cuckucy cgccucu 2.020 2.17e-02
145 cuckucy cucuggc 2.020 2.17e-02
147 cuckucy cuggccc 2.020 2.17e-02
156 cuckucy cccuccc 2.020 2.17e-02
164 cuckucy cugaucc 2.020 2.17e-02
186 wcwwc gcaac 1.696 4.49e-02
190 cuckucy cccuugc 1.860 3.14e-02
197 cuckucy cgcaucc 1.840 3.29e-02
209 wcwwc acuuu 1.696 4.49e-02
210 cuckucy cuuugcc 1.850 3.22e-02
234 wcwwc acuuu 2.186 1.44e-02
247 wcwwc acuua 1.941 2.61e-02
251 wcwwc acaac 2.676 3.73e-03
254 wcwwc acacc 2.186 1.44e-02
269 cuckucy cgcgacu 2.360 9.14e-03
271 cuckucy cgacucu 1.800 3.59e-02
274 cuckucy cucuccc 2.980 1.44e-03
275 wcwwc ucucc 2.186 1.44e-02
278 cuckucy cccgacg 1.800 3.59e-02
293 cuckucy cuauucu 3.240 5.98e-04
294 wcwwc uauuc 1.941 2.61e-02
296 cuckucy uucugcc 2.580 4.94e-03
297 wcwwc ucugc 1.941 2.61e-02
301 cuckucy cccauuu 1.810 3.51e-02
313 cuckucy cacuucc 3.250 5.77e-04
314 wcwwc acuuc 2.431 7.53e-03
315 cuckucy cuucccc 1.940 2.62e-02
318 cuckucy ccccgcc 1.940 2.62e-02
319 cuckucy cccgccg 1.840 3.29e-02
321 cuckucy cgccgcu 1.840 3.29e-02
324 cuckucy cgcugcc 2.490 6.39e-03
330 cuckucy caggacc 1.930 2.68e-02
335 cuckucy cccgcuu 1.930 2.68e-02
337 cuckucy cgcuucu 3.250 5.77e-04
339 cuckucy cuucucu 2.490 6.39e-03
342 cuckucy cucugaa 1.820 3.44e-02
352 cuckucy cucuccu 2.930 1.69e-03
354 cuckucy cuccuug 1.770 3.84e-02
355 cuckucy uccuugc 1.770 3.84e-02
362 cuckucy agcugcu 1.770 3.84e-02
424 wcwwc ucaac 2.676 3.73e-03
433 wcwwc gcuuc 2.373 8.82e-03
436 wcwwc ucacc 2.647 4.06e-03
439 wcwwc ccaac 2.657 3.94e-03
448 wcwwc acuau 2.657 3.94e-03
454 wcwwc accuc 2.402 8.15e-03
456 cuckucy cucgacu 2.030 2.12e-02
457 wcwwc ucgac 2.412 7.93e-03
460 wcwwc acuac 3.392 3.47e-04
463 wcwwc acgac 2.657 3.94e-03
481 wcwwc auuuc 2.765 2.85e-03
483 cuckucy uucuacu 1.860 3.14e-02
484 wcwwc ucuac 3.745 9.02e-05
487 wcwwc acugc 2.735 3.12e-03
502 wcwwc agaac 2.676 3.73e-03
504 cuckucy aacuucu 1.820 3.44e-02
505 wcwwc acuuc 3.539 2.01e-04
507 cuckucy uucuacc 1.690 4.55e-02
508 wcwwc ucuac 3.412 3.22e-04
590 cuckucy cccgccc 1.860 3.14e-02
596 cuckucy ccugucc 2.310 1.04e-02
597 cuckucy cuguccc 2.310 1.04e-02
602 cuckucy cccuagc 1.840 3.29e-02
604 cuckucy cuagccg 1.840 3.29e-02
609 cuckucy cgccgcu 1.860 3.14e-02
611 cuckucy ccgcucc 1.860 3.14e-02
612 cuckucy cgcuccg 1.860 3.14e-02
616 cuckucy ccgggcu 1.850 3.22e-02
621 cuckucy cucugcu 3.090 1.00e-03
623 cuckucy cugcucg 1.820 3.44e-02
626 cuckucy cucgccc 3.250 5.77e-04
629 cuckucy gcccucc 1.950 2.56e-02
630 cuckucy cccuccu 2.660 3.91e-03
632 cuckucy cuccuac 2.660 3.91e-03
634 wcwwc ccuac 1.824 3.41e-02
647 cuckucy cacaccc 1.860 3.14e-02
648 wcwwc acacc 2.373 8.82e-03
651 cuckucy cccuucu 3.100 9.68e-04
652 wcwwc ccuuc 2.373 8.82e-03
653 cuckucy cuucucc 2.370 8.89e-03
654 cuckucy uucuccc 2.370 8.89e-03
655 wcwwc ucucc 2.373 8.82e-03
658 cuckucy cccuucg 2.220 1.32e-02
659 wcwwc ccuuc 2.373 8.82e-03
670 wcwwc acaac 2.892 1.91e-03
673 wcwwc acgac 2.412 7.93e-03
690 cuckucy agcuucu 1.780 3.75e-02
691 wcwwc gcuuc 2.186 1.44e-02
692 cuckucy cuucucc 1.780 3.75e-02
694 wcwwc ucucc 2.186 1.44e-02
698 cuckucy cacggcc 1.780 3.75e-02
742 wcwwc acaug 1.941 2.61e-02
748 wcwwc ugaac 1.941 2.61e-02
760 wcwwc ucauc 2.794 2.60e-03
763 wcwwc ucugc 2.618 4.42e-03
775 wcwwc acgac 2.843 2.23e-03
784 wcwwc ccuuc 2.882 1.98e-03
787 wcwwc ucauc 3.765 8.33e-05
790 wcwwc ucaaa 2.833 2.31e-03
793 wcwwc aaaac 2.833 2.31e-03
796 wcwwc acauc 3.745 9.02e-05
799 wcwwc ucauc 3.745 9.02e-05
801 cuckucy aucaucc 1.660 4.85e-02
802 wcwwc ucauc 3.745 9.02e-05
822 cuckucy agcggcu 2.170 1.50e-02
825 cuckucy ggcuucu 2.820 2.40e-03
827 cuckucy cuucucg 2.090 1.83e-02
830 cuckucy cucggcc 3.250 5.77e-04
836 cuckucy cgccgcc 2.130 1.66e-02
846 cuckucy cucgucu 3.780 7.84e-05
861 cuckucy cuggccu 2.560 5.23e-03
863 cuckucy ggccucc 1.910 2.81e-02
864 cuckucy gccuccu 1.910 2.81e-02
866 cuckucy cuccuac 2.530 5.70e-03
867 cuckucy uccuacc 1.910 2.81e-02
906 cuckucy cccgccc 2.000 2.27e-02
912 cuckucy cgcggcc 2.030 2.12e-02
919 wcwwc acagc 1.696 4.49e-02
921 cuckucy agcgucu 2.040 2.07e-02
924 cuckucy gucugcu 2.040 2.07e-02
925 wcwwc ucugc 1.696 4.49e-02
926 cuckucy cugcucc 2.040 2.07e-02
929 cuckucy cuccacc 2.040 2.07e-02
930 wcwwc uccac 1.696 4.49e-02
932 cuckucy caccucc 2.030 2.12e-02
933 wcwwc accuc 1.696 4.49e-02
941 cuckucy cuuguac 2.020 2.17e-02
943 wcwwc uguac 1.696 4.49e-02
979 wcwwc gcauc 1.941 2.61e-02
981 cuckucy aucgacc 2.310 1.04e-02
982 wcwwc ucgac 1.941 2.61e-02
993 cuckucy guggucu 2.310 1.04e-02
996 cuckucy gucuucc 2.670 3.79e-03
997 wcwwc ucuuc 3.353 4.00e-04
1001 cuckucy ccccuac 1.840 3.29e-02
1002 cuckucy cccuacc 2.530 5.70e-03
1003 wcwwc ccuac 2.618 4.42e-03
1004 cuckucy cuacccu 1.840 3.29e-02
1006 cuckucy acccucu 1.850 3.22e-02
1007 cuckucy cccucuc 1.840 3.29e-02
1009 cuckucy cucucaa 1.840 3.29e-02
1011 cuckucy cucaacg 1.840 3.29e-02
1012 wcwwc ucaac 3.167 7.70e-04
1015 wcwwc acgac 2.431 7.53e-03
1018 wcwwc acagc 2.431 7.53e-03
1025 cuckucy cucgccc 2.580 4.94e-03
1031 cuckucy caagucc 2.040 2.07e-02
1040 cuckucy cgccucg 1.660 4.85e-02
1043 cuckucy cucgcaa 1.670 4.75e-02
1047 cuckucy caagacu 1.670 4.75e-02
1056 cuckucy agcgccu 1.680 4.65e-02
1058 cuckucy cgccuuc 1.680 4.65e-02
1059 cuckucy gccuucu 2.390 8.42e-03
1060 wcwwc ccuuc 1.696 4.49e-02
1061 cuckucy cuucucu 2.570 5.08e-03
1062 cuckucy uucucuc 1.860 3.14e-02
1064 cuckucy cucuccg 2.580 4.94e-03
1065 wcwwc ucucc 1.882 2.99e-02
1066 cuckucy cuccguc 1.860 3.14e-02
1067 cuckucy uccgucc 2.580 4.94e-03
1068 cuckucy ccguccu 1.860 3.14e-02
1070 cuckucy guccucg 1.860 3.14e-02
1071 wcwwc uccuc 1.912 2.79e-02
1073 cuckucy cucggau 2.580 4.94e-03
1076 cuckucy ggauucu 1.860 3.14e-02
1078 cuckucy auucucu 1.860 3.14e-02
1081 cuckucy cucugcu 3.110 9.35e-04
1082 wcwwc ucugc 1.912 2.79e-02
1083 cuckucy cugcucu 2.580 4.94e-03
1086 cuckucy cucuccu 3.110 9.35e-04
1087 wcwwc ucucc 1.882 2.99e-02
1088 cuckucy cuccucg 2.580 4.94e-03
1089 wcwwc uccuc 1.882 2.99e-02
1091 cuckucy cucgacg 2.570 5.08e-03
1092 wcwwc ucgac 1.824 3.41e-02
1097 cuckucy ggagucc 1.860 3.14e-02
1100 cuckucy guccucc 2.560 5.23e-03
1101 cuckucy uccuccc 1.850 3.22e-02
1103 cuckucy cuccccg 1.860 3.14e-02
1259 cuckucy accuucu 1.670 4.75e-02
1260 wcwwc ccuuc 1.696 4.49e-02
1262 cuckucy uucugcu 1.860 3.14e-02
1263 wcwwc ucugc 1.824 3.41e-02
1276 wcwwc acagc 1.882 2.99e-02
1283 wcwwc accuc 1.912 2.79e-02
1285 cuckucy cuccuca 2.210 1.36e-02
1286 wcwwc uccuc 1.882 2.99e-02
1291 wcwwc acagc 1.824 3.41e-02
1297 cuckucy cacuggu 1.770 3.84e-02
1299 cuckucy cuggucc 2.930 1.69e-03
1302 cuckucy guccuca 1.770 3.84e-02
1303 wcwwc uccuc 2.412 7.93e-03
1306 wcwwc ucaag 2.422 7.72e-03
1317 cuckucy cacgucu 2.750 2.98e-03
1318 wcwwc acguc 2.784 2.68e-03
1319 cuckucy cgucucc 1.670 4.75e-02
1320 cuckucy gucucca 1.670 4.75e-02
1321 wcwwc ucucc 2.784 2.68e-03
1322 cuckucy cuccaca 1.680 4.65e-02
1323 wcwwc uccac 2.784 2.68e-03
1328 wcwwc acauc 3.637 1.38e-04
1331 wcwwc ucagc 2.784 2.68e-03
1336 wcwwc acaac 3.627 1.43e-04
1339 wcwwc acuac 3.627 1.43e-04
1348 cuckucy cgccucc 1.860 3.14e-02
1355 cuckucy cuccacu 1.860 3.14e-02
1356 wcwwc uccac 2.431 7.53e-03
1370 cuckucy cuauccu 1.860 3.14e-02
1420 wcwwc agauc 1.941 2.61e-02
1423 wcwwc ucagc 1.941 2.61e-02
1426 wcwwc gcaac 1.941 2.61e-02
1429 wcwwc acaac 2.431 7.53e-03
1477 wcwwc ucaag 2.314 1.03e-02
1492 wcwwc acaac 2.431 7.53e-03
1495 wcwwc acguc 1.941 2.61e-02
1498 wcwwc ucuug 1.941 2.61e-02
1597 wcwwc uuauc 1.941 2.61e-02
1621 wcwwc acauc 1.941 2.61e-02
1629 cuckucy uccgucc 1.780 3.75e-02
1653 cuckucy cucauuu 1.780 3.75e-02
1669 wcwwc acuug 1.696 4.49e-02
1682 wcwwc acgac 1.696 4.49e-02
1688 wcwwc agaac 1.882 2.99e-02
1702 wcwwc acaaa 1.912 2.79e-02
1706 wcwwc acuug 1.912 2.79e-02
1709 wcwwc ugaac 1.882 2.99e-02
1712 wcwwc acagc 1.882 2.99e-02
1715 wcwwc gcuac 1.824 3.41e-02
1724 cuckucy cucuugu 1.690 4.55e-02
1725 wcwwc ucuug 1.882 2.99e-02
1784 wcwwc ucacc 1.696 4.49e-02
1791 wcwwc ugaac 1.824 3.41e-02
1794 wcwwc acuug 1.882 2.99e-02
1801 wcwwc ucaaa 1.912 2.79e-02
1810 wcwwc ugauc 2.402 8.15e-03
1813 wcwwc ucaaa 2.402 8.15e-03
1819 wcwwc gcaac 2.402 8.15e-03
1822 wcwwc accuc 2.373 8.82e-03
1827 wcwwc acaac 2.794 2.60e-03
1842 wcwwc ucuug 1.941 2.61e-02
1880 wcwwc ucaaa 1.696 4.49e-02
1889 wcwwc acuuu 1.824 3.41e-02
1903 wcwwc agaac 1.824 3.41e-02
1906 wcwwc acuuu 1.696 4.49e-02
1907 cuckucy cuuuuuu 1.950 2.56e-02
1921 wcwwc ccauc 1.882 2.99e-02
1923 cuckucy aucuuuu 1.950 2.56e-02
1924 wcwwc ucuuu 1.882 2.99e-02
1925 cuckucy cuuuuuu 1.950 2.56e-02
1931 cuckucy uuuuucu 1.950 2.56e-02
1932 wcwwc uuuuc 1.696 4.49e-02
1935 wcwwc ucuuu 1.696 4.49e-02
1938 wcwwc uuaac 1.696 4.49e-02
2077 wcwwc aguac 1.696 4.49e-02
Protein: SRSF5(Hs/Mm)
Sequence Position Motif K-mer Z-score P-value
144 yywcwsg ccucugg 2.613 4.49e-03
157 yywcwsg ccucccg 2.591 4.78e-03
239 yywcwsg gcacugg 1.828 3.38e-02
275 yywcwsg ucucccg 1.925 2.71e-02
339 yywcwsg cuucucu 2.323 1.01e-02
341 yywcwsg ucucuga 2.312 1.04e-02
368 yywcwsg uuagacg 2.516 5.93e-03
382 yywcwsg uuuuucg 2.602 4.63e-03
384 yywcwsg uuucggg 2.581 4.93e-03
405 yywcwsg ccucccg 2.505 6.12e-03
434 yywcwsg cuucacc 2.086 1.85e-02
440 yywcwsg caacagg 2.398 8.24e-03
464 yywcwsg cgacucg 2.043 2.05e-02
485 yywcwsg cuacugc 2.086 1.85e-02
623 yywcwsg cugcucg 2.312 1.04e-02
646 yywcwsg ucacacc 2.581 4.93e-03
653 yywcwsg cuucucc 2.462 6.91e-03
660 yywcwsg cuucggg 2.398 8.24e-03
692 yywcwsg cuucucc 1.849 3.22e-02
695 yywcwsg cuccacg 1.849 3.22e-02
827 yywcwsg cuucucg 3.032 1.21e-03
850 yywcwsg ucucaga 2.656 3.95e-03
917 yywcwsg ccacagc 1.882 2.99e-02
948 yywcwsg cugcagg 2.312 1.04e-02
970 yywcwsg ccucaga 2.462 6.91e-03
986 yywcwsg ccccucg 2.516 5.93e-03
1008 yywcwsg ccucuca 2.323 1.01e-02
1061 yywcwsg cuucucu 2.516 5.93e-03
1063 yywcwsg ucucucc 2.613 4.49e-03
1080 yywcwsg ucucugc 2.613 4.49e-03
1088 yywcwsg cuccucg 2.613 4.49e-03
1107 yywcwsg ccgcagg 2.484 6.50e-03
1125 yywcwsg ccccugg 2.204 1.38e-02
1231 yywcwsg cuccugg 2.398 8.24e-03
1261 yywcwsg cuucugc 2.484 6.50e-03
1264 yywcwsg cugcugg 2.645 4.08e-03
1274 yywcwsg ccacagc 3.054 1.13e-03
1287 yywcwsg ccucaca 3.054 1.13e-03
1289 yywcwsg ucacagc 3.065 1.09e-03
1296 yywcwsg ccacugg 3.419 3.14e-04
1304 yywcwsg ccucaag 3.043 1.17e-03
1324 yywcwsg ccacaca 2.301 1.07e-02
1357 yywcwsg ccacucg 2.656 3.95e-03
1823 yywcwsg ccucaca 1.828 3.38e-02
1983 yywcwsg uuacaca 2.280 1.13e-02
1993 yywcwsg uuucucu 2.398 8.24e-03
1995 yywcwsg ucucugu 2.398 8.24e-03
2050 yywcwsg uuacaca 1.882 2.99e-02
Protein: SRSF6(Hs/Mm)
Sequence Position Motif K-mer Z-score P-value
1327 yrcrkm cacauc 2.596 4.72e-03
Protein: SRSF7(Hs/Mm)
Sequence Position Motif K-mer Z-score P-value
250 acgacg uacaac 2.282 1.12e-02
264 acgacg aaggac 2.936 1.66e-03
269 acgacg cgcgac 3.090 1.00e-03
278 acgacg cccgac 2.577 4.98e-03
394 wggacra uggaaaa 1.957 2.52e-02
413 acgacg gacgau 1.692 4.53e-02
450 acgacg uaugac 3.295 4.92e-04
456 acgacg cucgac 3.551 1.92e-04
459 acgacg gacuac 3.667 1.23e-04
462 acgacg uacgac 3.962 3.72e-05
492 acgacg gacgag 1.692 4.53e-02
496 wggacra aggagga 2.819 2.41e-03
499 wggacra aggagaa 2.819 2.41e-03
669 acgacg gacaac 3.705 1.06e-04
672 acgacg aacgac 4.038 2.70e-05
675 acgacg gacggc 3.987 3.35e-05
685 acgagagay gcgggagcu 2.375 8.77e-03
698 acgacg cacggc 3.077 1.05e-03
699 acgagagay acggccgac 1.850 3.22e-02
702 acgacg gccgac 2.782 2.70e-03
710 acgagagay gcuggagau 1.850 3.22e-02
737 acgagagay aggagacau 1.850 3.22e-02
751 acgagagay accagaguu 1.850 3.22e-02
765 acgacg ugcgac 3.256 5.65e-04
772 wggacra cggacga 2.340 9.64e-03
774 acgacg gacgac 3.897 4.87e-05
777 acgacg gacgag 3.372 3.73e-04
981 acgacg aucgac 2.269 1.16e-02
1154 acgacg caccac 2.705 3.42e-03
1161 acgagagay agcagcgac 2.200 1.39e-02
1164 acgacg agcgac 2.897 1.88e-03
1174 wggacra aggagga 3.234 6.10e-04
1192 wggacra aggaaga 3.447 2.83e-04
1216 wggacra uggaaaa 2.340 9.64e-03
1317 acgacg cacguc 2.641 4.13e-03
1335 acgacg cacaac 2.167 1.51e-02
1338 acgacg aacuac 2.205 1.37e-02
1468 wggacra aggagaa 2.436 7.43e-03
1491 acgacg cacaac 2.090 1.83e-02
1494 acgacg aacguc 2.718 3.28e-03
1567 wggacra uggaaaa 1.957 2.52e-02
1665 acgacg gaggac 3.231 6.17e-04
1681 acgacg aacgac 3.564 1.83e-04
1682 wggacra acgacga 2.798 2.57e-03
1684 acgacg gacgag 3.231 6.17e-04
1736 wggacra aggaaaa 2.340 9.64e-03
1746 wggacra aggaaaa 2.340 9.64e-03
Protein: SRSF9(Hs/Mm)
Sequence Position Motif K-mer Z-score P-value
496 akgavmr aggagga 3.831 6.38e-05
499 akgavmr aggagaa 3.985 3.37e-05
514 akgavmr agcagca 3.662 1.25e-04
517 akgavmr agcagca 3.662 1.25e-04
520 akgavmr agcagca 3.538 2.02e-04
1141 akgavmr aggagac 1.985 2.36e-02
1174 akgavmr aggagga 3.646 1.33e-04
1177 akgavmr aggaaca 3.831 6.38e-05
1192 akgavmr aggaaga 3.138 8.51e-04
1193 kgrwgsm ggaagaa 2.254 1.21e-02
1512 akgavmr aggagga 3.031 1.22e-03
1515 akgavmr aggaacg 2.985 1.42e-03
1642 akgavmr aggagca 1.938 2.63e-02
Protein: TARDBP(Hs/Mm)
Sequence Position Motif K-mer Z-score P-value
813 ugugug uguaug 2.550 5.39e-03
815 ugugug uaugug 2.550 5.39e-03
817 ugugug ugugga 1.972 2.43e-02
1208 ugugug uguuuc 1.908 2.82e-02
1210 ugugug uuucug 1.908 2.82e-02
1212 ugugug ucugug 2.294 1.09e-02
1214 ugugug ugugga 1.908 2.82e-02
1546 ugugug ugcgug 1.991 2.32e-02
1726 ugugug cuugug 1.679 4.66e-02
1728 ugugug ugugcg 2.064 1.95e-02
1730 ugugug ugcgua 1.679 4.66e-02
Protein: TIA1(Hs/Mm)
Sequence Position Motif K-mer Z-score P-value
379 uuuuubk auuuuuu 3.108 9.42e-04
380 uuuuubk uuuuuuu 3.431 3.01e-04
381 uuuuubk uuuuuuc 3.353 4.00e-04
382 uuuuubk uuuuucg 3.412 3.22e-04
383 uuuuubk uuuucgg 2.824 2.37e-03
1207 uuuuubk uuguuuc 1.765 3.88e-02
1535 uuuuubk cuuuuuu 2.422 7.72e-03
1536 uuuuubk uuuuuug 2.775 2.76e-03
1537 uuuuubk uuuuugc 2.480 6.57e-03
1907 uuuuubk cuuuuuu 3.343 4.14e-04
1908 uuuuubk uuuuuua 3.676 1.18e-04
1909 uuuuubk uuuuuau 3.412 3.22e-04
1910 uuuuubk uuuuaug 3.363 3.85e-04
1924 uuuuubk ucuuuuu 3.147 8.25e-04
1925 uuuuubk cuuuuuu 3.343 4.14e-04
1926 uuuuubk uuuuuuu 3.794 7.41e-05
1927 uuuuubk uuuuuuu 3.794 7.41e-05
1928 uuuuubk uuuuuuu 3.794 7.41e-05
1929 uuuuubk uuuuuuu 3.794 7.41e-05
1930 uuuuubk uuuuuuc 3.676 1.18e-04
1931 uuuuubk uuuuucu 3.549 1.93e-04
1932 uuuuubk uuuucuu 3.147 8.25e-04
1933 uuuuubk uuucuuu 3.147 8.25e-04
1934 uuuuubk uucuuua 3.020 1.26e-03
1960 uuuuubk uuguuuu 2.471 6.74e-03
1961 uuuuubk uguuuuu 2.471 6.74e-03
1962 uuuuubk guuuuua 2.520 5.87e-03
1963 uuuuubk uuuuuaa 2.559 5.25e-03
2109 uuuuubk auuuuuu 3.333 4.30e-04
2110 uuuuubk uuuuuuu 3.676 1.18e-04
2111 uuuuubk uuuuuuu 3.676 1.18e-04
2112 uuuuubk uuuuuua 3.578 1.73e-04
2113 uuuuubk uuuuuau 3.353 4.00e-04
2114 uuuuubk uuuuauu 3.088 1.01e-03
2115 uuuuubk uuuauuu 3.088 1.01e-03
2116 uuuuubk uuauuua 2.961 1.53e-03
Protein: TRA2A(Hs/Mm)
Sequence Position Motif K-mer Z-score P-value
39 gaagaggaag gcagagggag 1.739 4.10e-02
492 gaagaggaag gacgaggagg 1.739 4.10e-02
1173 gaagaggaag gaggaggaac 4.326 7.59e-06
1176 gaagaggaag gaggaacaag 3.815 6.81e-05
1179 gaagaggaag gaacaagaag 4.326 7.59e-06
1182 gaagaggaag caagaagaug 3.815 6.81e-05
1185 gaagaggaag gaagaugagg 4.326 7.59e-06
1188 gaagaggaag gaugaggaag 4.598 2.13e-06
1191 gaagaggaag gaggaagaaa 3.815 6.81e-05
1511 gaagaggaag gaggaggaac 1.739 4.10e-02
1638 gaagaggaag gcagaggagc 2.424 7.68e-03
1641 gaagaggaag gaggagcaaa 2.424 7.68e-03
1662 gaagaggaag gaagaggacu 2.685 3.63e-03
Protein: TRA2B(Hs/Mm)
Sequence Position Motif K-mer Z-score P-value
1176 gaagaa gaggaa 3.277 5.25e-04
1179 gaagaa gaacaa 3.277 5.25e-04
1182 gaagaa caagaa 3.277 5.25e-04
1185 gaagaa gaagau 3.277 5.25e-04
1191 gaagaa gaggaa 3.277 5.25e-04
1194 gaagaa gaagaa 3.652 1.30e-04
1400 aaguguu caguguc 1.821 3.43e-02
1669 aaguguu acuuguu 2.105 1.76e-02
1690 aaguguu aacaguu 1.916 2.77e-02
1769 aaguguu aaauguc 2.200 1.39e-02
1794 aaguguu acuuguu 2.200 1.39e-02
1839 aaguguu gagucuu 1.916 2.77e-02
1854 aaguguu aagauuu 2.105 1.76e-02
1905 aaguguu aacuuuu 1.726 4.22e-02
1940 aaguguu aacagau 2.074 1.90e-02
1942 aaguguu cagauuu 2.074 1.90e-02
1945 aaguguu auuugua 2.095 1.81e-02
1947 aaguguu uuguauu 2.200 1.39e-02
1955 aaguguu aagaauu 2.947 1.60e-03
1958 aaguguu aauuguu 3.326 4.41e-04
1960 aaguguu uuguuuu 2.242 1.25e-02
1969 aaguguu aaaaauu 2.263 1.18e-02
1970 aaguguu aaaauuu 2.263 1.18e-02
1971 aaguguu aaauuuu 2.989 1.40e-03
1972 aaguguu aauuuua 2.263 1.18e-02
1978 aaguguu aagauuu 3.021 1.26e-03
1988 aaguguu caauguu 2.558 5.26e-03
1989 aaguguu aauguuu 1.853 3.19e-02
1990 aaguguu auguuuc 1.884 2.98e-02
2002 aaguguu aaauauu 2.526 5.77e-03
2015 aaguguu aaaugua 2.432 7.51e-03
2025 aaguguu aacuuua 1.768 3.85e-02
2035 aaguguu aaacguu 2.242 1.25e-02
2036 aaguguu aacguuu 1.684 4.61e-02
2037 aaguguu acguuua 1.684 4.61e-02
2083 aaguguu uaguauu 2.105 1.76e-02
2107 aaguguu uaauuuu 1.684 4.61e-02
2108 aaguguu aauuuuu 2.242 1.25e-02
Protein: TUT1(Hs/Mm)
Sequence Position Motif K-mer Z-score P-value
2073 mrauacu auauagu 2.115 1.72e-02
Protein: U2AF2(Hs/Mm)
Sequence Position Motif K-mer Z-score P-value
379 uuuuuyc auuuuuu 2.905 1.84e-03
380 uuuuuyc uuuuuuu 3.190 7.11e-04
381 uuuuuyc uuuuuuc 3.371 3.74e-04
382 uuuuuyc uuuuucg 2.952 1.58e-03
1535 uuuuuyc cuuuuuu 2.638 4.17e-03
1536 uuuuuyc uuuuuug 2.857 2.14e-03
1537 uuuuuyc uuuuugc 2.857 2.14e-03
1538 uuuuuyc uuuugcc 2.562 5.20e-03
1907 uuuuuyc cuuuuuu 3.390 3.49e-04
1908 uuuuuyc uuuuuua 3.676 1.18e-04
1909 uuuuuyc uuuuuau 3.314 4.60e-04
1924 uuuuuyc ucuuuuu 3.095 9.84e-04
1925 uuuuuyc cuuuuuu 3.390 3.49e-04
1926 uuuuuyc uuuuuuu 3.752 8.77e-05
1927 uuuuuyc uuuuuuu 3.752 8.77e-05
1928 uuuuuyc uuuuuuu 3.752 8.77e-05
1929 uuuuuyc uuuuuuu 3.752 8.77e-05
1930 uuuuuyc uuuuuuc 3.943 4.02e-05
1931 uuuuuyc uuuuucu 3.533 2.05e-04
1932 uuuuuyc uuuucuu 3.219 6.43e-04
1933 uuuuuyc uuucuuu 3.095 9.84e-04
1960 uuuuuyc uuguuuu 1.990 2.33e-02
1961 uuuuuyc uguuuuu 1.990 2.33e-02
1962 uuuuuyc guuuuua 2.105 1.76e-02
1963 uuuuuyc uuuuuaa 2.095 1.81e-02
2109 uuuuuyc auuuuuu 3.143 8.36e-04
2110 uuuuuyc uuuuuuu 3.457 2.73e-04
2111 uuuuuyc uuuuuuu 3.457 2.73e-04
2112 uuuuuyc uuuuuua 3.390 3.49e-04
2113 uuuuuyc uuuuuau 3.076 1.05e-03
2114 uuuuuyc uuuuauu 2.914 1.78e-03
2115 uuuuuyc uuuauuu 2.857 2.14e-03
Protein: YBX1(Hs/Mm)
Sequence Position Motif K-mer Z-score P-value
437 caaccacaa caccaacag 1.954 2.54e-02
438 aacaucd accaaca 2.610 4.53e-03
440 caaccacaa caacaggaa 1.954 2.54e-02
458 caaccacaa cgacuacga 1.954 2.54e-02
504 aacaucd aacuucu 3.117 9.14e-04
511 aacaucd accagca 3.130 8.74e-04
514 aacaucd agcagca 2.987 1.41e-03
517 aacaucd agcagca 2.987 1.41e-03
520 aacaucd agcagca 2.987 1.41e-03
783 aacaucd accuuca 3.922 4.39e-05
786 aacaucd uucauca 3.805 7.09e-05
788 caaccacaa caucaaaaa 1.954 2.54e-02
791 caaccacaa caaaaacau 1.954 2.54e-02
795 aacaucd aacauca 4.818 7.25e-07
798 aacaucd aucauca 4.468 3.95e-06
801 aacaucd aucaucc 4.130 1.81e-05
803 caaccacaa cauccagga 1.954 2.54e-02
896 caaccacaa cagcccgaa 1.954 2.54e-02
914 caaccacaa cggccacag 1.954 2.54e-02
1017 aacaucd gacagca 2.234 1.27e-02
1150 caaccacaa cgcccacca 2.276 1.14e-02
1153 caaccacaa ccaccacca 2.598 4.69e-03
1155 aacaucd accacca 3.221 6.39e-04
1156 caaccacaa ccaccagca 2.759 2.90e-03
1158 aacaucd accagca 3.143 8.36e-04
1275 aacaucd cacagca 2.416 7.85e-03
1282 aacaucd aaccucc 2.000 2.27e-02
1327 aacaucd cacauca 1.662 4.83e-02
1422 aacaucd aucagca 2.909 1.81e-03
1424 caaccacaa cagcaacaa 3.391 3.48e-04
1425 aacaucd agcaaca 2.909 1.81e-03
1427 caaccacaa caacaaccg 2.920 1.75e-03
1428 aacaucd aacaacc 3.026 1.24e-03
1430 caaccacaa caaccgaaa 3.391 3.48e-04
1445 caaccacaa cagccccag 2.920 1.75e-03
1680 caaccacaa aaacgacga 2.276 1.14e-02
1683 caaccacaa cgacgagaa 2.276 1.14e-02
1697 caaccacaa gaaacacaa 2.598 4.69e-03
1699 aacaucd aacacaa 2.117 1.71e-02
1711 aacaucd aacagcu 2.299 1.08e-02
Protein: YBX2(Hs/Mm)
Sequence Position Motif K-mer Z-score P-value
504 aacawcd aacuucu 2.838 2.27e-03
511 aacawcd accagca 2.716 3.30e-03
514 aacawcd agcagca 2.797 2.58e-03
517 aacawcd agcagca 2.797 2.58e-03
520 aacawcd agcagca 2.797 2.58e-03
792 aacawcd aaaaaca 3.378 3.65e-04
795 aacawcd aacauca 3.743 9.09e-05
798 aacawcd aucauca 3.297 4.89e-04
801 aacawcd aucaucc 3.108 9.42e-04
1014 aacawcd aacgaca 2.203 1.38e-02
1017 aacawcd gacagca 2.095 1.81e-02
1020 aacawcd agcagcu 2.068 1.93e-02
1158 aacawcd accagca 2.743 3.04e-03
1161 aacawcd agcagcg 2.770 2.80e-03
1180 aacawcd aacaaga 2.649 4.04e-03
1275 aacawcd cacagca 2.284 1.12e-02
1282 aacawcd aaccucc 1.770 3.84e-02
1327 aacawcd cacauca 2.865 2.09e-03
1330 aacawcd aucagca 2.622 4.37e-03
1335 aacawcd cacaacu 2.905 1.84e-03
1338 aacawcd aacuacg 2.838 2.27e-03
1422 aacawcd aucagca 2.946 1.61e-03
1425 aacawcd agcaaca 3.297 4.89e-04
1428 aacawcd aacaacc 3.568 1.80e-04
1613 aacawcd cacagca 1.824 3.41e-02
1620 aacawcd uacaucc 1.865 3.11e-02
1681 aacawcd aacgacg 1.986 2.35e-02
1711 aacawcd aacagcu 2.554 5.32e-03
1920 aacawcd accaucu 2.284 1.12e-02
Protein: ZC3H10(Hs/Mm)
Sequence Position Motif K-mer Z-score P-value
29 ssagcgm ccagcga 3.384 3.57e-04
45 ssagcgm ggagcga 3.342 4.16e-04
49 ssagcgm cgagcgg 3.315 4.58e-04
86 ssagcgm gcagagc 2.918 1.76e-03
91 ssagcgm gcugcgc 3.000 1.35e-03
96 ssagcgm gcugcgg 2.712 3.34e-03
152 ssagcgm ccagccc 2.260 1.19e-02
176 ssagcgm ccagcgg 2.466 6.83e-03
524 ssagcgm gcagagc 3.397 3.41e-04
526 ssagcgm agagcga 3.493 2.39e-04
536 ssagcgm gcagccc 3.685 1.14e-04
543 ssagcgm ccggcgc 3.534 2.05e-04
550 ssagcgm ccagcga 3.329 4.36e-04
876 ssagcgm gcugcgc 3.137 8.53e-04
889 ssagcgm acagcgg 3.329 4.36e-04
895 ssagcgm gcagccc 3.521 2.15e-04
919 ssagcgm acagcgu 2.438 7.38e-03
1036 ssagcgm ccugcgc 2.712 3.34e-03
1054 ssagcgm ccagcgc 2.014 2.20e-02
1109 ssagcgm gcagggc 2.342 9.59e-03
1114 ssagcgm gcagccc 2.384 8.56e-03
1162 ssagcgm gcagcga 1.740 4.09e-02
1344 ssagcgm gcagcgc 2.137 1.63e-02
Protein: ZC3H14(Hs/Mm)
Sequence Position Motif K-mer Z-score P-value
379 uuuduuu auuuuuu 2.134 1.64e-02
380 uuuduuu uuuuuuu 2.454 7.06e-03
381 uuuduuu uuuuuuc 2.144 1.60e-02
1907 uuuduuu cuuuuuu 3.227 6.25e-04
1908 uuuduuu uuuuuua 3.247 5.83e-04
1909 uuuduuu uuuuuau 3.247 5.83e-04
1924 uuuduuu ucuuuuu 3.186 7.21e-04
1925 uuuduuu cuuuuuu 3.247 5.83e-04
1926 uuuduuu uuuuuuu 3.856 5.76e-05
1927 uuuduuu uuuuuuu 3.856 5.76e-05
1928 uuuduuu uuuuuuu 3.856 5.76e-05
1929 uuuduuu uuuuuuu 3.856 5.76e-05
1930 uuuduuu uuuuuuc 3.247 5.83e-04
1931 uuuduuu uuuuucu 3.258 5.61e-04
1932 uuuduuu uuuucuu 3.309 4.68e-04
1933 uuuduuu uuucuuu 3.794 7.41e-05
1946 uuuduuu uuuguau 3.454 2.76e-04
1948 uuuduuu uguauuu 3.186 7.21e-04
1959 uuuduuu auuguuu 2.856 2.15e-03
1960 uuuduuu uuguuuu 2.825 2.36e-03
1961 uuuduuu uguuuuu 2.629 4.28e-03
2109 uuuduuu auuuuuu 3.196 6.97e-04
2110 uuuduuu uuuuuuu 3.763 8.39e-05
2111 uuuduuu uuuuuuu 3.763 8.39e-05
2112 uuuduuu uuuuuua 3.206 6.73e-04
2113 uuuduuu uuuuuau 3.206 6.73e-04
2114 uuuduuu uuuuauu 3.268 5.42e-04
2115 uuuduuu uuuauuu 3.763 8.39e-05
Protein: ZCRB1(Hs/Mm)
Sequence Position Motif K-mer Z-score P-value
1848 grhuuaa gacugaa 2.695 3.52e-03
1856 grhuuaa gauuuag 2.756 2.93e-03
1935 grhuuaa ucuuuaa 2.085 1.85e-02
1949 grhuuaa guauuua 2.915 1.78e-03
1950 grhuuaa uauuuaa 3.268 5.42e-04
1963 grhuuaa uuuuuaa 3.073 1.06e-03
1973 grhuuaa auuuuaa 3.073 1.06e-03
1980 grhuuaa gauuuac 2.659 3.92e-03
2010 grhuuaa ccauuaa 2.915 1.78e-03
2020 grhuuaa uaaauaa 2.744 3.03e-03
2026 grhuuaa acuuuaa 2.793 2.61e-03
2030 grhuuaa uaauaaa 2.744 3.03e-03
